# Supplementary material for: CGIAR Barley Breeding Toolbox: A diversity panel to facilitate breeding and genomic research in the developing world
Source: Front Plant Sci. 2022 Nov 14;13:1034322. doi: 10.3389/fpls.2022.1034322 (PMC9702823; doi:10.3389/fpls.2022.1034322)
Supplement: Supplementary file 3 [file Table_1.xlsx]

## Sheet: Supplementary Table S1
Supplementary Table 1: Characterization of the 530 entries of the Global Barley Panel, including their pedigree/name, row-type and origin.
Genotype	Pedigree	Row Type	Origin
G01	CI7584	6	Landrace
G02	P.STO/3/LBIRAN/UNA80//LIGNEE640/4/BLLU/5/PETUNIA 1/6/M9846//CCXX14.ARZ3/PACO/3/PALTON	6	ICARDA
G03	P.STO/3/LBIRAN/UNA80//LIGNEE640/4/BLLU/5/PETUNIA 1/6/ZIGZIG/4/EGYPT4/TERAN78//P.STO/3/QUINA	6	ICARDA
G04	C-84	6	Landrace
G05	Arta	6	ICARDA
G06	PL 172	6	India
G07	TR03189	2	Canada
G08	RD2660	6	India
G09	6B10-4515	6	USA
G10	MADRE SELVA/Keel	6	ICARDA
G11	MADRE SELVA/Barque	6	ICARDA
G12	Alanda-01/Petunia1	2	ICARDA
G13	SEN	2	ICARDA
G14	PENCO/CHEVRON-BAR//BREA/DL70	6	ICARDA
G15	BREA/DL70//3*TOCTE/3/6B89.2027/CHAMICO	6	ICARDA
G16	LEGACY/CHAMICO//TRADITION	6	ICARDA
G17	LEGACY/4/TOCTE//GOB/HUMAI10/3/ATAH92/ALELI/5/LEGACY/CHAMICO	6	ICARDA
G18	WI3167/6/ANCA/2469//TOJI/3/SHYRI/4/ATACO/5/ALELI/7/Arar/Lignee527//Zy/DL69	2	ICARDA
G19	BREA/DL70/M97.106	6	ICARDA
G20	BISON 217/3/SVANHALS-BAR/MSEL//AZAF/GOB24DH	2	ICARDA
G21	Alanda/5/Aths/4/Pro/TolI//Cer12/TolI/3/5106/6/Aths/7/Giza129	6	ICARDA
G22	STAB33/PASION	2	ICARDA
G23	RD 2794	6	India
G24	HBL 316	6	India
G25	K 409	6	India
G26	BHS 380	6	India
G27	VLB 1	6	India
G28	RD 2786	6	India
G29	VLB 118	6	India
G30	HBL 113	2	India
G31	PL 751	6	India
G32	K 603	6	India
G33	TR250	2	Canada
G34	SONU	6	India
G35	NB 1	6	India
G36	BHS 400 (BCU-8019)	6	India
G37	ASSI	6	ICARDA
G38	CANELA/BICHY2000	6	ICARDA
G39	IQBA07-22	6	ICARDA
G40	Zanbaka/5/Pyo/Cam//Avt/RM1508/3/Pon/4/Mona/Ben//Cam/6/Mundah	2	ICARDA
G41	Carina/Moroc9-75//WI3257	2	ICARDA
G42	6B89.2027/CHAMICO//TRADITION	6	ICARDA
G43	LAKHAN (K226)	6	India
G44	WI3180/4/ALISO/CI3909.2//HB602/3/MOLA/SHYRI//ARUPO*2/JET	6	ICARDA
G45	Barjouj	6	Africa
G46	Haruna Nijo	6	Other
G47	15UCM 92	2	USA
G48	IG 144015	6	Landrace
G49	IG 144107	6	Landrace
G50	IG 144146	6	Landrace
G51	IG 144149	6	Landrace
G52	IG 143951	6	Landrace
G53	IG 144146	6	Landrace
G54	Mari/aths*2	6	ICARDA
G55	IG 26731	6	Landrace
G56	IG 26051	6	Landrace
G57	IG 24770	6	Landrace
G58	IG 24414	6	Landrace
G59	Coss/OWB71080-44-1H//Viringa'S'/3/WI3180	2	ICARDA
G60	H96117004	6	Canada
G61	Tichedrette	2	Africa
G62	CABUYA/MJA//PETUNIA1/5/PENCO/CHEVRON-BAR/3/ATACO/BERMEJO//HIGO/4/PETUNIA1	6	ICARDA
G63	Petunia1	6	ICARDA
G64	Atahualpa	2	ICARDA
G65	CPOLO 9109/PETUNIA 2 M00053001 08/1G0035	6	ICARDA
G66	VMorales/6/ZIGZIG/4/EGYPT4/TERAN78//P.STO/3/QUINA CBSS04B00042S-0M-0Y-0M-0Y-1M-0AP	6	ICARDA
G67	BBSC/CONGONA//FRESA CBSS05Y00126S-20Y-0M-0Y-0M-2AP	6	ICARDA
G68	MSEL/LOGAN-BAR CBSS03B00016S-0M-0Y-0M-0Y-1M-0Y	2	ICARDA
G69	Chigwell	6	Canada
G70	Busby	2	Canada
G71	Xena	2	Canada
G72	Celebration	6	Canada
G73	CIRU/ZIGZIG	6	ICARDA
G74	ICARDA SN326	6	ICARDA
G75	HB511/JAEGER H00056005 09/3H0078	6	Other
G76	LACEY	6	USA
G77	P.STO/3/LBIRAN/UNA80//LIGNEE640/4/BLLU/5/PETUNIA 1/6/CHAMICO/TOCTE//CONGONA	6	ICARDA
G78	Legacy	6	Canada
G79	ICARO	2	USA
G80	ALELI/SCARLETT CBSS05M00148S-2M-0Y-0M-0AP-0TR	2	ICARDA
G81	SUMBARD400	6	USA
G82	DWR28	2	India
G83	FIRAT	2	Europe
G84	CABUYA/MJA//PETUNIA 1/5/PENCO/CHEVRON-BAR/3/ATACO/ BERMEJO//HIGO/4/PETUNIA 1	6	ICARDA
G85	Flagon	2	Europe
G86	Bentley	2	Canada
G87	Hooded 1	6	Other
G88	Hooded 2	6	Other
G89	Hooded 3	6	Landrace
G90	Hooded 4	6	Landrace
G91	Hooded 5	6	Landrace
G92	Hooded 6	6	Landrace
G93	Hooded 7	6	Other
G94	Hooded 8	6	Other
G95	Harrington	2	Canada
G96	Stander	6	USA
G97	Piri	2	Europe
G98	Minak	2	USA
G99	Ymer	2	USA
G100	Emir	6	USA
G101	Kenia	2	Europe
G102	DWRB 101	2	India
G103	DWRB 123	2	India
G104	DWRB137	6	India
G105	DWRB 150	2	India
G106	AC-6629	6	ICARDA
G107	San Cristobal	2	Latin-America
G108	Alanda//Lignee527/Arar/3/BF891M-617	6	ICARDA
G109	Arbayan/NK1272/6/CI01021/4/CM67/U.Sask.1800//Pro/CM67/3/DL70/5/Nacha2	6	ICARDA
G110	ATACO/COMINO//ALELI	6	ICARDA
G111	BBSC/CONGONA	6	ICARDA
G112	CWB117-9-7/3/Roho//Alger/Ceres362-1-1/4/Pamir-147/Sonata	2	ICARDA
G113	Katara//SLB34-65/Arar	6	ICARDA
G114	Massine/BF891M-596	6	ICARDA
G115	NT111//Sonata/Arta	2	ICARDA
G116	PETUNIA1/TITIRIBI	6	ICARDA
G117	Tipper/Moroc9-75	2	ICARDA
G118	WI2269/Espe/3/WI2291/Bgs//Hml-02	2	ICARDA
G119	ZIGZIG/4/BBSC/CONGONA/3/ATACO/BERMEJO//HIGO	6	ICARDA
G120	RWA.M54/3/K-247/2401-13//Vavilon/4/Meteor	6	ICARDA
G121	U.Sask.1766/Api//Cel/3/Weeah/4/Giza121/Pue	6	ICARDA
G122	OUSSAMA	6	Africa
G123	TIDDAS	2	Africa
G124	AMALOU	6	Africa
G125	ACSAD68	6	ICARDA
G126	TAFFA	6	Africa
G127	ARIG 8	6	Africa
G128	FIRDAWS	6	Africa
G129	TISSA	2	Africa
G130	TAMELLALT	2	Africa
G131	MASSINE	6	Africa
G132	ACSAD 176	6	USA
G133	AZILAL	2	Africa
G134	Furat-1	6	ICARDA
G135	YP 230	6	Other
G136	11MQ31	2	USA
G137	YP505	6	Other
G138	YP526	6	Other
G139	B081J	2	USA
G140	Alanda//Lignee527/Arar/3/Asal/4/AwBlack/Aths//Rhn-08/7/Man/4/Bal16/Pro//Apm/DwII-1Y/3/Api/CM67/5/Gas/OreS/6/Atahualpa	6	ICARDA
G141	PENCO/CHEVRON-BAR/3/LEGACY//PENCO/CHEVRON-BAR	6	ICARDA
G142	PENCO/CHEVRON-BAR//FEG53.16/3/LEGACY//PENCO/CHEVRON-BAR	6	ICARDA
G143	BICHY2000/PRTL	2	ICARDA
G144	Clipper//WI2291*2/WI2269/7/Hml-02/5/Cq/Cm//Apm/3/12410/4/Giza134-2L/6/Clipper/Volla/3/Arr/Esp//Alger/Ceres362-1-1/4/Hml	2	ICARDA
G145	Pol 3	2	Other
G146	15UCM 49	2	USA
G147	15UCM 74	2	USA
G148	15UCM 64	2	USA
G149	PENCO/CHEVRON-BAR	6	ICARDA
G150	15UCM 53	2	USA
G151	15UCM 32	2	USA
G152	15UCM 87	2	USA
G153	15UCM 79	2	USA
G154	15UCM 59	2	USA
G155	Andreia	2	Latin-America
G156	15UCM 16	2	USA
G157	15UCM 102	2	USA
G158	PETUNIA 1	6	ICARDA
G159	15UCM 18	2	USA
G160	15UCM 20	2	USA
G161	15UCM 106	2	USA
G162	15UCM 67	2	USA
G163	15UCM 92	2	USA
G164	15UCM 88	2	USA
G165	15UCM34	2	USA
G166	15UCM 22	2	USA
G167	CIRUELO	6	ICARDA
G168	15UCM 47	2	USA
G169	15UCM9	2	USA
G170	15UCM23	2	USA
G171	15UCM 72	2	USA
G172	15UCM 52	2	USA
G173	15UCM 17	2	USA
G174	15UCM 58	2	USA
G175	Scarlett	2	Europe
G176	Pasadena	2	Europe
G177	Mauritia	2	Europe
G178	Philadelphia	2	Europe
G179	Bodega	2	Europe
G180	Aricada	2	Europe
G181	Victoriana	2	Europe
G182	MSEL/FNC1	2	ICARDA
G183	Suzuka	2	Europe
G184	Cocktail	6	Europe
G185	Orria	2	Europe
G186	Barabas	2	Europe
G187	Christina	2	Europe
G188	Nymfe	2	Europe
G189	Poet	2	Europe
G190	ESMERALDA/LEGACY/6/P.STO/3/LBIRAN/UNA80//LIGNEE640/4/BLLU/5/PETUNIA 1	6	ICARDA
G191	Power	6	Europe
G192	SJ055066	2	Other
G193	SJ056089	2	Other
G194	CLASS	2	Europe
G195	KEOPS	2	Europe
G196	QUENCH	2	Europe
G197	HENLEY	2	Europe
G198	LOGAN-BAR/MSEL//AZAF	2	ICARDA
G199	FAIRYTALE	2	Europe
G200	UMBRELLA	2	Europe
G201	ANAKIN	2	Europe
G202	CHARMAY	2	Europe
G203	IRON	2	Europe
G204	JB FLAVOUR	2	Europe
G205	KONTIKI	2	Europe
G206	STINE	2	Europe
G207	CALCULE	2	Europe
G208	MAGALY	2	Europe
G209	MERIT,B/4/AZAF/3/ARUPO/K8755//MORA/5/MSEL	2	ICARDA
G210	JB MALTASIA	2	Europe
G211	ESSENTIAL	2	Europe
G212	TRADITION	6	Canada
G213	INNOVATION	6	USA
G214	STELLAR ND	6	USA
G215	6B10-4804	6	USA
G216	6B10-4905	6	USA
G217	2B10-4274	2	USA
G218	2B10-4162	2	USA
G219	ACUARIO T95/BCD12DH	2	ICARDA
G220	2B10-4543	2	USA
G221	2B09-3425	2	USA
G222	ABI VOYAGER	2	USA
G223	MERIT 57	2	Canada
G224	CONRAD	2	USA
G225	MADRE SELVA/Malt 1	6	ICARDA
G226	Harrington/Arta//Malt 1	6	ICARDA
G227	CANELA/Malt 2	6	ICARDA
G228	MADRE SELVA/Malt 2	6	ICARDA
G229	MSEL//DEFRA/CL128	2	ICARDA
G230	MEDUSA/DIAMANT-BAR//D1.72	6	ICARDA
G231	L-345	6	Other
G232	PETUNIA2/M111//QUINA/M112	2	ICARDA
G233	CC33MS/5/NY65005-18/3/13929/NUM/ASSE/4/KBR	6	ICARDA
G234	2Ab09-X06F084-51	2	USA
G235	Transit	2	USA
G236	Julie	2	USA
G237	CDC Fibar	2	Canada
G238	CDC Candle	2	Canada
G239	CDC Rattan	2	Canada
G240	CDC Alamo	2	Canada
G241	RD2668	2	India
G242	WI3167/6/ANCA/2469//TOJI/3/SHYRI/4/ATACO/5/ALELI/7/Schooner/Babunj//Noor68/Kataf	2	ICARDA
G243	DD-21/3/Harmal-02/ArabiAbiad//ER/Apm	2	ICARDA
G244	DD-21/4/ALISO/CI3909.2//HB602/3/MOLA/SHYRI//ARUPO*2/JET	6	ICARDA
G245	Rt013/Nainaa/4/Lignee527/Chn-01//Gustoe/3/Atahualpa	2	ICARDA
G246	Rhn-03//Lignee527/As45/4/Manitou/3/Arbayan-01//CI07117-9/DeirAlla106	6	ICARDA
G247	GK58/3/Kc/MullersHeydla//Sls/4/Wieselbuger//Ahor1303-61//Ste/Antares	2	ICARDA
G248	Nadawa/Rhn-03//Saida	6	ICARDA
G249	Moroc9-75//WI2291/WI2269	2	ICARDA
G250	BICHY2000/SHENMAINO.3	2	ICARDA
G251	Demhay/4/Viringa'S'//WI2291/WI2269/3/Viringa'S'	2	ICARDA
G252	Alanda/Zafraa//Gloria'S'/Copal'S'/3/F6NB_7	6	ICARDA
G253	WI2291	2	Australia
G254	Clipper//WI2291*2/WI2269/5/Soufara-02/3/RM1508/Por//WI2269/4/Hml-02/ArabiAbiad//ER/Apm	2	ICARDA
G255	Soufara-02/3/RM1508/Por//WI2269/4/Hml-02/ArabiAbiad//ER/Apm/5/((GalleonxRichard)/5)xTilga	2	ICARDA
G256	C 8806	2	Other
G257	C9430	2	Other
G258	CLE 202	2	Latin-America
G259	GoldMarker	6	Europe
G260	Isaria	2	Europe
G261	Piroline	2	USA
G262	Stirling	6	Australia
G263	ATILIR	2	Europe
G264	SEEBE	2	Canada
G265	H01063002 09/2S0009	6	USA
G266	J02006004 09/2T0095	2	USA
G267	J02077006 09/2T0166	2	USA
G268	BREA/DL70//CABUYA/3/BREA/DL70//3*CABUYA	6	ICARDA
G269	BISON 218.1/6/P.STO/3/LBIRAN/UNA80//LIGNEE640/4/BLLU/5/PETUNIA 1	6	ICARDA
G270	CONDOR-BAR/3/PATTY.B/RUDA//ALELI/4/ALELI/5/DIAMALT	2	ICARDA
G271	ZIGZIG/BLLU//PETUNIA 1	2	ICARDA
G272	Defra	2	Europe
G273	TR05671	2	Canada
G274	Braemar	2	Europe
G275	R.T.RAMAGE	2	USA
G276	C 50	2	Landrace
G277	Arar/H.spont.19-15//Hml/3/H.spont.41-1/Tadmor/4/Tadmor//ER/Apm	2	ICARDA
G278	J04079115 09/3T0039	2	USA
G279	Alanda-01//Atahualpa/IraqiBlack	2	ICARDA
G280	Arar/Rhn-03//Kabaa-03/4/Manal/3/Lignee527/NK1272//JLB70-63	6	ICARDA
G281	Aths/Lignee686/4/Avt/Attiki//Aths/3/Giza121/Pue	6	ICARDA
G282	Lignee527/Aths//Aths/Lignee686/3/Alanda	6	ICARDA
G283	LACEY/ATILIR	6	ICARDA
G284	M104/PFC 88210//DOÑA JOSEFA	6	ICARDA
G285	PENCO/CHEVRON-BAR/6/P.STO/3/LBIRAN/UNA80//LIGNEE640/4/ BLLU/5/PETUNIA 1	6	ICARDA
G286	FRESA/PETUNIA 1/7/P.STO/3/LBIRAN/UNA80//LIGNEE640/4/ BLLU/5/PETUNIA 1/6/LEGACY//PENCO/CHEVRON-BAR	6	ICARDA
G287	P.STO/3/LBIRAN/UNA80//LIGNEE640/4/BLLU/5/PETUNIA 1/6/P.STO/3/LBIRAN/UNA80//LIGNEE640/4/BLLU/5/PETUNIA 1	6	ICARDA
G288	P.STO/3/LBIRAN/UNA80//LIGNEE640/4/BLLU/5/PETUNIA 1/6/TOCTE	6	ICARDA
G289	CIRU/3/LEGACY//PENCO/CHEVRON-BAR	6	ICARDA
G290	Moronera	2	Latin-America
G291	CIRU/TOCTE	6	ICARDA
G292	GLORIA-BAR/COPAL/6/P.STO/3/LBIRAN/UNA80 //LIGNEE640/4/BLLU/5/PETUNIA 1	6	ICARDA
G293	CIRUELO/6/P.STO/3/LBIRAN/UNA80//LIGNEE640 /4/BLLU/5/PETUNIA 1	6	ICARDA
G294	RECLA 60/BICHY2000//LIMON/BICHY2000/3/ BCD12DH	2	ICARDA
G295	BLLU/3/BREA/DL70//3*CABUYA	6	ICARDA
G296	CANELA//LIMON/BICHY2000	2	ICARDA
G297	LBIRAN/UNA80//LIGNEE640/6/P.STO/3/LBIRAN/UNA80//LIGNEE640/4/BLLU/5/PETUNIA 1	6	ICARDA
G298	CANELA//ATAH92/GOB	2	ICARDA
G299	Grignon	2	Latin-America
G300	CANELA/DIAMALT	2	ICARDA
G301	Cerise/Shyri//Aleli/3/Mpyt169.1Y/Laurel//Olmo/4/Canela/5/DWRUB52	2	ICARDA
G302	CANELA/DIAMALT	2	ICARDA
G303	MSEL/ALELI	2	ICARDA
G304	SLB15-05/4/H.spont.96-3/3/Roho//Alger/Ceres362-1-1/5/Roho/4/Zanbaka/3/ER/Apm//Lignee131	2	ICARDA
G305	Moroc9-75//WI2291/WI2269/3/Nawair 1	2	ICARDA
G306	ChiCm/An57//Albert/3/Alger/Ceres362-1-1/4/Arta/5/Nawair 1	2	ICARDA
G307	QUINA/MJA//SCARLETT	6	ICARDA
G308	ChiCm/An57//Albert/3/Alger/Ceres362-1-1/4/Arta/5/Nawair 1	2	ICARDA
G309	Gloria'S'/Copal'S'//As46/Aths/3/Rhn-03/4/Lignee527/Aths//Lignee527/NK1272	6	ICARDA
G310	Hma-02//11012-2/CM67/3/Alanda/5/Rhn-03//Lignee527/NK1272/4/Lignee527/Chn-01/3/Alanda/6/AwBlack/Aths//Rhn-08/3/Malouh	6	ICARDA
G311	Gloria'S'/Copal'S'//As46/Aths/3/Rhn-03/5/QB813-2/5/Aths/Lignee686/4/Rhn-03/3/Bc/Rhn//Ky63-1294	6	ICARDA
G312	Rihane-03/3/As46/Aths*2//Aths/Lignee686/4/Momtaz	6	ICARDA
G313	Rhn-03/Eldorado/5/Rhn-03//Lignee527/NK1272/4/Lignee527/Chn-01/3/Alanda/6/Rihane-03/4/Lignee527//Bahtim/DL71/3/Api/CM67//Mzq	6	ICARDA
G314	Hma-02//11012-2/CM67/3/Alanda/5/Rhn-03//Lignee527/NK1272/4/Lignee527/Chn-01/3/Alanda/6/Rhn//Bc/Coho/3/DeirAlla106//Api/EB89-8-2-15-4/5/CM67/3/Apro//Sv02109/Mari/4/Carbo	6	ICARDA
G315	Baca'S'/3/AC253//CI08887/CI05761/4/Cen/Bglo'S'/5/Alanda-01/3/Alanda//Lignee527/Arar	6	ICARDA
G316	Rhn-03/Eldorado/5/Rhn-03//Lignee527/NK1272/4/Lignee527/Chn-01/3/Alanda/6/Aths/Lignee686/4/Avt/Attiki//Aths/3/Giza121/Pue	6	ICARDA
G317	MSEL/LOGAN-BAR	2	ICARDA
G318	Alanda//Ssn/Lignee640/3/QB813-2	6	ICARDA
G319	Avt/Attiki//M-Att-73-337-1/3/Aths/Lignee686/4/Kabaa	6	ICARDA
G320	Rhn-03//Lignee527/NK1272/3/Lignee527/Chn-01//Alanda/4/Eldorado	6	ICARDA
G321	CIRU/TOCTE	6	ICARDA
G322	SVANHALS-BAR/MSEL//AZAF/GOB24DH/3/NE167/CLE176	2	ICARDA
G323	CIRU//BREA/DL70/3/SUMBARD400	6	ICARDA
G324	TROCHU/VIVAR	6	ICARDA
G325	PENCO/CHEVRON-BAR//ATAH92/GOB	6	ICARDA
G326	MSEL//PENCO/CHEVRON-BAR	2	ICARDA
G327	FRANKLIN-BAR//LIMON/BICHY2000	2	ICARDA
G328	CHAMICO/TOCTE//CONGONA/3/LEGACY//PENCO/CHEVRON-BAR	6	ICARDA
G329	PENCO/CHEVRON-BAR//FALCON-BAR	2	ICARDA
G330	PETUNIA 1/RITA PELADA	6	ICARDA
G331	Granger	2	Australia
G332	Gairdner	2	Australia
G333	Flinders	2	Australia
G334	Fleet	2	Australia
G335	AZAF/SCARLETT	2	ICARDA
G336	Flagship	2	Australia
G337	Fathom	2	Australia
G338	Commander	2	Australia
G339	Compass	2	Australia
G340	Capstan	2	Australia
G341	Buloke	2	Australia
G342	Baudin	2	Australia
G343	Barque	2	Australia
G344	Harmal	2	ICARDA
G345	ESMERALDA/3/SLLO/ROBUST//QUINA/4/M104	6	ICARDA
G346	Hindmarsh	2	Australia
G347	Keel	2	Australia
G348	La Trobe	2	Australia
G349	Martime	2	Australia
G350	Rosalind	2	Australia
G351	Schooner	2	Australia
G352	BRS195/SCARLETT	2	ICARDA
G353	Shepherd	2	Australia
G354	Skipper	2	Australia
G355	Sloop	2	Australia
G356	Westminster	2	Europe
G357	BL10	6	India
G358	BL16	6	India
G359	DWRUB52	2	India
G360	PFC9202//LM 844/QUILMES PAMPA/3/CANELA	2	ICARDA
G361	Furat-3	2	ICARDA
G362	Kardia	2	USA
G363	PFC9214//PENCO/CHEVRON-BAR	2	ICARDA
G364	08ARS028-20	2	USA
G365	LIMON/BICHY2000/4/ALELI/3/ARUPO/K8755//MORA/5/MSEL	2	ICARDA
G366	80.5162/MSEL//GLORIA-BAR/IAR.H.485	2	ICARDA
G367	11ARS108-4	2	USA
G368	10ARS041-1	2	USA
G369	Rihane03/Atahualpa	2	ICARDA
G370	CHAMICO	6	ICARDA
G371	LIMON/BICHY2000//CANELA/3/MSEL	2	ICARDA
G372	SC 36Z47-L2	2	Europe
G373	Zeppelin (variedad europea)	2	Europe
G374	CANELA//ATAH92/GOB	2	ICARDA
G375	CANELA//ND16680/ND13111	2	ICARDA
G376	BRS195/ND19098-1	2	ICARDA
G377	BISON 216.4/6/P.STO/3/LBIRAN/UNA80//LIGNEE640/4/BLLU/5/PETUNIA 1	2	ICARDA
G378	LIMON/BICHY2000/3/ALELI/CANELA//GOB96DH/4/ASAHI 5/2*ALELI	2	ICARDA
G379	CIRU/TOCTE	6	ICARDA
G380	BISON 136/CANELA	2	ICARDA
G381	CIRU/3/LEGACY//PENCO/CHEVRON-BAR	6	ICARDA
G382	P.STO/3/LBIRAN/UNA80//LIGNEE640/4/BLLU/5/PETUNIA 1/6/KENTUCKY36	6	ICARDA
G383	MSEL//LIMON/BICHY2000	2	ICARDA
G384	Alexis	2	Europe
G385	Atribut	2	Europe
G386	BICHY2000//GOB/HUMAI10	2	ICARDA
G387	Chanell	2	Europe
G388	Derkado	2	Europe
G389	Harry	2	USA
G390	Reem/TR05671	2	ICARDA
G391	P.STO/3/LBIRAN/UNA80//LIGNEE640/4/BLLU/5/PETUNIA 1/6/M111/7/LEGACY/3/SVANHALSBAR/MSEL//AZAF/GOB24DH	6	ICARDA
G392	Xena/Nawair-01	2	ICARDA
G393	MSEL/FNC1//Canela	2	ICARDA
G394	Melusine/Aleli/3/Matico/Jet//Shyri/4/Canela/5/Canela	2	ICARDA
G395	Melusine/Aleli/3/Matico/Jet//Shyri/4/Canela/5/MSEL//DEFRA/CL128	2	ICARDA
G396	ChiCm/An57//Albert/3/Alger/Ceres362-1-1/4/Arta/5/Hml	2	ICARDA
G397	Hauran-3/MADRE SELVA	2	ICARDA
G398	MADRE SELVA/4/Clipper/Volla/3/Arr/Esp//Alger/Ceres362-1-1/4/Hml	2	ICARDA
G399	Cerise/Shyri//Aleli/3/Mpyt169-1Y/Laurel//Olmo/4/Canela/5/Leb71/CBB37//Leb71/CBB29/3/Lignee527/Chn-01	2	ICARDA
G400	CompCr229//As46/Pro/3/Srs/4/RWA-M47/5/Carbo/Hamra/4/Rhn-08/3/DeirAlla106//DL71/Strain205	6	ICARDA
G401	Nawair-01	2	ICARDA
G402	MSEL/LA MOLINA 95	2	ICARDA
G403	Rhn//Bc/Coho/3/DeirAlla106//Api/EB89-8-2-15-4/5/CM67/3/Apro//Sv02109/Mari/4/Carbo/6/Beecher	6	ICARDA
G404	Rhn//Bc/Coho/3/DeirAlla106//Api/EB89-8-2-15-4/5/CM67/3/Apro//Sv02109/Mari/4/Carbo/6/IPA7	6	ICARDA
G405	Aths/IPA7	6	ICARDA
G406	Manal/6/P.STO/3/LBIRAN/UNA80//LIGNEE640/4/BLLU/5/PETUNIA 1	6	ICARDA
G407	ATACO/COMINO//ALELI/6/P.STO/3/LBIRAN/UNA80//LIGNEE640/4/BLLU/5/PETUNIA 1	6	ICARDA
G408	Giza132/Ishi	6	ICARDA
G409	Momtaz/6/ESMERALDA/LEGACY/6/P.STO/3/LBIRAN/UNA80//LIGNEE640/4/BLLU/5/PETUNIA 1	6	ICARDA
G410	P.STO/3/LBIRAN/UNA80//LIGNEE640/4/BLLU/5/PETUNIA 1/6/LACEY	6	ICARDA
G411	Xena/3/MSEL//DEFRA/CL128	2	ICARDA
G412	SARA1-BAR/CAPUCHONA 20	6	ICARDA
G413	TRIUMPH-BAR/TYRA//ARUPO*2/ABN-B/3/CANELA/4/TOCTE//GOB/HUMAI10/3/ATAH92/ALELI/5/CANELA	2	ICARDA
G414	BT554/MAHIGAN	6	Other
G415	RECLA 86/3/7085-B/ND4994.15//ND7556	2	ICARDA
G416	Harmal-02/ArabiAbiad*2/4/Soufara-02/3/RM1508/Por//WI2269	2	ICARDA
G417	WI2291//Apm/PI000046/3/Hml-02/4/WI3213	2	ICARDA
G418	Mzq/Gva//PI002917/3/WI2291/WI2269/4/WI3213	2	ICARDA
G419	MSEL/ND19098-1//CANELA	2	ICARDA
G420	Tidone/8/Pld10342//Cr115/Por/3/Bahtim9/4/Ds/Apro/5/WI2291/6/WI2291/WI2269/7/WI2291/WI2269//WI2291/Bgs	2	ICARDA
G421	Clipper//WI2291*2/WI2269/5/Soufara-02/3/RM1508/Por//WI2269/4/Hml-02/ArabiAbiad//ER/Apm	2	ICARDA
G422	Mzq/Gva//PI002917/3/WI2291/WI2269/4/WI3213	2	ICARDA
G423	H.spont.41-1/WI3257	2	ICARDA
G424	WI2291//Apm/PI000046/3/Hml-02/4/Mzq/Gva//PI002917/3/WI2291/WI2269	2	ICARDA
G425	Moroc9-75//WI2291/CI01387/3/H.spont.41-1	2	ICARDA
G426	PETUNIA 2/M111	6	ICARDA
G427	RD2552	6	India
G428	RD2592	6	India
G429	CHAKIRA	2	Europe
G430	Petunia1//Atahualpa/IraqiBlack	2	ICARDA
G431	Momtaz	6	ICARDA
G432	PENCO/CHEVRON-BAR//ND20493	6	ICARDA
G433	PENCO/CHEVRON-BAR//GRIT	6	ICARDA
G434	BREA/DL70//TOCTE/3/BREA/DL70//CABUYA/4/BREA/DL70//CABUYA	6	ICARDA
G435	LEGACY/4/TOCTE//GOB/HUMAI10/3/ATAH92/ALELI/5/CIRUELO	2	ICARDA
G436	LEGACY/CHAMICO//ATAH92/GOB	6	ICARDA
G437	GADA/PYE//VADA	2	ICARDA
G438	ZIG ZIG/PUNGSANCHAPSSALBORI	6	ICARDA
G439	BGCLM 157.MBV/ND20493	6	ICARDA
G440	ORCA-BAR/WC46310	6	ICARDA
G441	ORCA-BAR/GUAYABA	2	ICARDA
G442	SHYRI/3/ZHEDAR#1/SHYRI//OLMO	2	ICARDA
G443	OPS 19/CANELA	6	ICARDA
G444	TANGO-BAR/MALEBO	2	ICARDA
G445	BISON 129/CANELA	2	ICARDA
G446	OPS 66/CANELA	2	ICARDA
G447	SICH84.80/BISON 129	2	ICARDA
G448	V Morales	6	ICARDA
G449	SICH84.80/BISON 216.4	2	ICARDA
G450	STRIDER/3/GRIT/VALERIANA//GLORIA-BAR/COPAL	2	ICARDA
G451	BH 75	6	India
G452	BH 393	6	India
G453	RAJKIRAN	6	India
G454	RD 2035	6	India
G455	BCU 73	2	India
G456	H96109010	6	Canada
G457	DL 88	6	India
G458	K 508	6	India
G459	DWRUB 64	6	India
G460	DWRB 91	2	India
G461	ALFA 93	2	Latin-America
G462	DWRB 73	2	India
G463	DWRB 92	2	India
G464	HUB 113 (BCU-8017)	6	India
G465	BH 885	2	India
G466	Frontier/RD2668	2	ICARDA
G467	San cristobal/DWR28	2	ICARDA
G468	Moroc9-75/Hml/5/Roho/4/Zanbaka/3/ER/Apm//Lignee131/6/WI2291/3/CI03309/Attiki//Hja33/4/Gustoe/5/Arar/H.spont.19-15//Hml/3/H.spont.41-1/Tadmor	2	ICARDA
G469	ArabiAbiad/Arar//H.spont.41-5/Tadmor/3/ArabiAbiad/Arar//H.spont.41-5/Tadmor/4/Weeah11//WI2291/Bgs/3/ER/Apm//AC253	2	ICARDA
G470	DWR28/RD2668	2	ICARDA
G471	T-6669//Arda/Moroc9-75	2	ICARDA
G472	WI2291/Nawair-1	2	ICARDA
G473	Weeah11//WI2291/Bgs/3/ER/Apm//AC253/4/Harmal	2	ICARDA
G474	Leb71/CBB37//Leb71/CBB29/3/Lignee527/Chn-01/6/WI2291/4/7028/2759/3/69-82//Ds/Apro/5/Zanbaka/3/ER/Apm//Lignee131	2	ICARDA
G475	Arta/3/Legia/Laurel'S//Aleli/4/Arar/H.spont.19-15//Hml/3/H.spont.41-1/Tadmor/5/Zanbakian/6/Arta/WI3167	2	ICARDA
G476	WI2198/Hml-02//INRA55-86-2/Rt1703/3/Hml/4/Weeah11//WI2291/Bgs/3/ER/Apm//AC253	2	ICARDA
G477	Gobernadora/Nawair-1	2	ICARDA
G478	Rhn-03/3/Mr25-84/Att//Mari/Aths*3-02/4/Alanda-01/5/Rhn-03/3/Mr25-84/Att//Mari/Aths*3-02/4/Ssn/Badia//Arar/3/Gloria'S'/Copal'S'	6	ICARDA
G479	Nadawa/Rhn-03/3/Lignee527/Rihane//Arar/5/Lignee527/NK1272/4/Avt/Attiki//Aths/3/Giza121/Pue	6	ICARDA
G480	QB813-2/5/Aths/Lignee686/4/Rhn-03/3/Bc/Rhn//Ky63-1294/7/Rhn-03/3/Mr25-84/Att//Mari/Aths*3-02/6/Lignee527//Bahtim/DL71/3/Api/CM67//Mzq/5/Alanda-01/4/WI2291/3/Api/CM67//L2966-69	6	ICARDA
G481	H.spont.41-3/SLB34-40/7/Lignee527//Bahtim/DL71/3/Api/CM67//Mzq/5/Alanda-01/4/WI2291/3/Api/CM67//L2966-69/6/Lignee527/Chn-01//Arar/Rhn-03	6	ICARDA
G482	Alanda//Lignee527/Arar/6/Multan/M23/4/HopRo/3/Md/AT//CM/5/24569/7/U.Sask.1766/Api//Cel/3/Weeah/4/Arar/5/Aths	6	ICARDA
G483	Zanbaka/H.spont.41-2/4/Arar/H.spont.19-15//Hml/3/H.spont.41-1/Tadmor/5/Zanbakian/7/Lignee527//Bahtim/DL71/3/Api/CM67//Mzq/5/Alanda-01/4/WI2291/3/Api/CM67//L2966-69/6/Lignee527/Chn-01//Arar/Rhn-03	6	ICARDA
G484	Arig8/Imperial//M7/3/Rt013/4/Alanda-01/5/Lignee527/NK1272//JLB70-063/3/IPA99	6	ICARDA
G485	Hma-02//11012-2/CM67/3/Alanda/5/Rhn-03//Lignee527/NK1272/4/Lignee527/Chn-01/3/Alanda/6/Rhn-03/Eldorado/5/Rhn-03//Lignee527/NK1272/4/Lignee527/Chn-01/3/Alanda	6	ICARDA
G486	Lignee527/Chn-01//Alanda/3/As57/Kc/6/Lignee527/Chn-01//Alanda/5/Arizona5908/Aths//Avt/Attiki/3/S.T.Barley/4/Aths/Lignee686	6	ICARDA
G487	Rihane-03/3/As46/Aths*2//Aths/Lignee686/6/Rhn-03/Eldorado/5/Rhn-03//Lignee527/NK1272/4/Lignee527/Chn-01/3/Alanda	6	ICARDA
G488	Aths/Lignee686/4/Avt/Attiki//Aths/3/Giza121/Pue/6/Lignee527/Chn-01//Alanda/5/Arizona5908/Aths//Avt/Attiki/3/S.T.Barley/4/Aths/Lignee686	6	ICARDA
G489	Avt/Attiki//M-Att-73-337-1/3/Aths/Lignee686/4/Kabaa/5/Alanda-01/3/Alanda//Lignee527/Arar	6	ICARDA
G490	SLB21-81/SLB22-74//Soffet no.9	6	ICARDA
G491	Lignee527/NK1272//JLB70-063/3/IPA99/5/Arig8/Imperial//M7/3/Rt013/4/Alanda-01	6	ICARDA
G492	10HBSN26 // MADERA / UC937	6	ICARDA
G493	UC1134/11HB44	6	ICARDA
G494	ISHI / 11HBSN44	6	ICARDA
G495	11HB13//UC1134/1047	6	ICARDA
G496	Giza130/4/Alanda-01//Gerbel/Harma/3/Gloria'S'/Celo'S'//Teran78	6	ICARDA
G497	UC1115 / 11HBSN44	6	ICARDA
G498	Atahualpa/Chigwell	2	ICARDA
G499	WI3167/6/ANCA/2469//TOJI/3/SHYRI/4/ATACO/5/ALELI/7/Hml/Tadmor	2	ICARDA
G500	11HB13 // UC 1134/ UC 1047	6	ICARDA
G501	UC 1047 / 11HB44	6	ICARDA
G502	WI3167/6/ANCA/2469//TOJI/3/SHYRI/4/ATACO/5/ALELI/7/BKFMaguelone1604/3/Apro//Sv.02109/Mari/4/Giza119/5/Shyri	2	ICARDA
G503	TAMALPAIS / 11HBSN44	6	ICARDA
G504	MP30/UC1323	2	ICARDA
G505	Tocada/DWRUB52	2	ICARDA
G506	29IBON20// COORS 393 / ND 22202-C	2	ICARDA
G507	Frontier/RD2668	2	ICARDA
G508	HB120/DWR28	2	ICARDA
G509	STANDER-BAR//CALI92/ROBUST/3/LOGAN-BAR/MSEL//AZAF	2	ICARDA
G510	P.STO/3/LBIRAN/UNA80//LIGNEE640/4/BLLU/5/PETUNIA 1/6/LEGACY/7/MERIT,B//CLE150/W89.11369/3/CANELA	2	ICARDA
G511	HB120/Harmal	2	ICARDA
G512	P.STO/3/LBIRAN/UNA80//LIGNEE640/4/BLLU/5/PETUNIA 1/6/CIRU/7/P.STO/3/LBIRAN/UNA80//LIGNEE640/4/BLLU/5/PETUNIA 1/6/IBTA80/8/LIMON/BICHY2000//CANELA/3/MSEL	2	ICARDA
G513	29IBON20//ORCA/ND 22202	2	ICARDA
G514	P.STO/3/LBIRAN/UNA80//LIGNEE640/4/BLLU/5/PETUNIA 1/6/LEGACY/7/MADRE SELVA	2	ICARDA
G515	P.STO/3/LBIRAN/UNA80//LIGNEE640/4/BLLU/5/PETUNIA 1/6/LEGACY/7/MADRE SELVA	6	ICARDA
G516	ZACATECAS 4 (LEGACY/CHAMICO)//CIRU/BLLU	6	ICARDA
G517	ZACATECAS 4 (LEGACY/CHAMICO)/5/EXCEL-BAR/4/GLORIA-BAR/COME//LIGNEE640/3/S.P-B	6	ICARDA
G518	ZARZA//ATAH92/GOB/7/GLORIA-BAR/COPAL/6/P.STO/3/LBIRAN/UNA80//LIGNEE640/4/BLLU/5/PETUNIA 1	6	ICARDA
G519	ZARZA//ATAH92/GOB/7/P.STO/3/LBIRAN/UNA80//LIGNEE640/4/BLLU/5/PETUNIA 1/6/P.STO/3/LBIRAN/UNA80//LIGNEE640/4/BLLU/5/PETUNIA 1	6	ICARDA
G520	UC 1047 / BELLA UNION	6	ICARDA
G521	P.STO/3/LBIRAN/UNA80//LIGNEE640/4/BLLU/5/PETUNIA 1/6/CIRU/7/P.STO/3/LBIRAN/UNA80//LIGNEE640/4/BLLU/5/PETUNIA 1/6/IBTA80/8/CABUYA	6	ICARDA
G522	X // INDIAN BBARLEY/3*NK 1272	6	ICARDA
G523	UC1118 // UC1116 / YUMA	6	ICARDA
G524	22IBYT7 / UC 1047 // UC 1108	6	ICARDA
G525	SVANHALS-BAR/MSEL//AZAF/GOB24DH/3/NE167/CLE176	2	ICARDA
G526	Xena/DWRUB52	2	ICARDA
G527	Ishi *2/Giza 132	6	ICARDA
G528	Rhn//Bc/Coho/3/DeirAlla106//Api/EB89-8-2-15-4/5/CM67/3/Apro//Sv02109/Mari/4/Carbo/6/Lignee527/NK1272//JLB70-063/3/Rhn-03	6	ICARDA
G529	Ishi//Rihane/221BYT7	6	ICARDA
G530	DOÑA JOSEFA/3/BREA/DL70//3*CABUYA	6	ICARDA
