# Supplementary material for: CGIAR Barley Breeding Toolbox: A diversity panel to facilitate breeding and genomic research in the developing world
Source: Front Plant Sci. 2022 Nov 14;13:1034322. doi: 10.3389/fpls.2022.1034322 (PMC9702823; doi:10.3389/fpls.2022.1034322)
Supplement: Supplementary file 4 [file Table_2.xlsx]

## Sheet: Supplementary Table S2
Supplementary Table S2. Characterization of the 39,199 markers used in the population structure analysis.
Site Name	Chromosome	Physical Position	Major Allele	Major Allele Proportion	Major Allele Frequency	Minor Allele	Minor Allele Proportion	Minor Allele Frequency	PIC
SCRI_RS_169369	1H	142369	T	0.69434	0.70095	C	0.29623	0.29905	0.419238
JHI-Hv50k-2016-358	1H	145558	C	0.90943	0.91115	G	0.08868	0.08885	0.161911
JHI-Hv50k-2016-343	1H	146097	A	0.89057	0.89057	G	0.10943	0.10943	0.19491
JHI-Hv50k-2016-342	1H	146155	C	0.9434	0.9434	T	0.0566	0.0566	0.106793
SCRI_RS_149838	1H	146218	A	0.79434	0.79584	G	0.20377	0.20416	0.324957
SCRI_RS_227491	1H	147494	G	0.79434	0.79584	A	0.20377	0.20416	0.324957
JHI-Hv50k-2016-284	1H	158861	G	0.66226	0.66857	T	0.3283	0.33143	0.443168
JHI-Hv50k-2016-270	1H	159936	G	0.72075	0.7304	T	0.26604	0.2696	0.393832
JHI-Hv50k-2016-256	1H	162979	A	0.8566	0.85985	C	0.13962	0.14015	0.241016
JHI-Hv50k-2016-237	1H	164176	A	0.77925	0.78517	C	0.21321	0.21483	0.337356
BOPA2_12_30653	1H	164469	A	0.68302	0.68561	G	0.31321	0.31439	0.431098
JHI-Hv50k-2016-211	1H	167034	T	0.81887	0.82042	C	0.17925	0.17958	0.294662
JHI-Hv50k-2016-200	1H	167678	G	0.79811	0.80114	A	0.19811	0.19886	0.318629
BOPA1_2511-533	1H	173286	A	0.68302	0.68431	G	0.31509	0.31569	0.43206
JHI-Hv50k-2016-180	1H	173286	A	0.68113	0.68371	G	0.31509	0.31629	0.432501
JHI-Hv50k-2016-170	1H	174905	G	0.73774	0.8112	C	0.1717	0.1888	0.306309
JHI-Hv50k-2016-157	1H	182791	G	0.81321	0.83689	A	0.15849	0.16311	0.27301
JHI-Hv50k-2016-141	1H	187179	A	0.83774	0.84571	G	0.15283	0.15429	0.260969
JHI-Hv50k-2016-137	1H	188138	A	0.50377	0.50473	T	0.49434	0.49527	0.499955
SCRI_RS_204276	1H	188459	C	0.76981	0.77273	T	0.22642	0.22727	0.351237
JHI-Hv50k-2016-7	1H	244437	T	0.76792	0.77376	C	0.22453	0.22624	0.350111
JHI-Hv50k-2016-24	1H	246374	T	0.60189	0.60646	C	0.39057	0.39354	0.477333
JHI-Hv50k-2016-64	1H	250025	A	0.60755	0.61217	G	0.38491	0.38783	0.474836
JHI-Hv50k-2016-66	1H	250175	T	0.83585	0.84061	C	0.15849	0.15939	0.26797
JHI-Hv50k-2016-72	1H	250949	C	0.54151	0.54253	G	0.4566	0.45747	0.496382
JHI-Hv50k-2016-88	1H	252327	A	0.83774	0.83932	G	0.16038	0.16068	0.269724
JHI-Hv50k-2016-97	1H	252831	C	0.62075	0.62429	A	0.37358	0.37571	0.469104
JHI-Hv50k-2016-115	1H	281981	A	0.76981	0.77273	G	0.22642	0.22727	0.351237
BOPA2_12_10420	1H	282251	A	0.62264	0.62619	C	0.3717	0.37381	0.468152
BOPA1_3107-422	1H	282390	G	0.68491	0.6875	A	0.31132	0.3125	0.429688
JHI-Hv50k-2016-121	1H	282390	G	0.68491	0.6875	A	0.31132	0.3125	0.429688
JHI-Hv50k-2016-127	1H	282766	C	0.63019	0.63258	T	0.36604	0.36742	0.464845
JHI-Hv50k-2016-745	1H	370062	A	0.76226	0.76371	G	0.23585	0.23629	0.360914
JHI-Hv50k-2016-721	1H	371237	G	0.9566	0.95841	A	0.04151	0.04159	0.0797205
SCRI_RS_138156	1H	475320	G	0.83962	0.85577	A	0.14151	0.14423	0.246855
JHI-Hv50k-2016-498	1H	603322	C	0.81698	0.81698	T	0.18302	0.18302	0.299047
JHI-Hv50k-2016-468	1H	647796	G	0.82264	0.85658	A	0.13774	0.14342	0.245701
BOPA1_7174-365	1H	648318	C	0.86604	0.90533	G	0.09057	0.09467	0.171415
JHI-Hv50k-2016-449	1H	648966	A	0.58302	0.62551	G	0.34906	0.37449	0.468494
JHI-Hv50k-2016-408	1H	652156	G	0.65472	0.66859	A	0.32453	0.33141	0.443155
JHI-Hv50k-2016-392	1H	652531	C	0.67736	0.69574	T	0.29623	0.30426	0.423372
JHI-Hv50k-2016-786	1H	930032	A	0.9283	0.93006	C	0.06981	0.06994	0.130097
JHI-Hv50k-2016-823	1H	931238	C	0.65472	0.65472	T	0.34528	0.34528	0.452123
JHI-Hv50k-2016-847	1H	932629	G	0.59811	0.59811	A	0.40189	0.40189	0.480749
JHI-Hv50k-2016-872	1H	934070	G	0.95849	0.9603	T	0.03962	0.0397	0.0762478
JHI-Hv50k-2016-877	1H	934775	C	0.59811	0.59811	T	0.40189	0.40189	0.480749
BOPA2_12_30969	1H	938921	G	0.7434	0.7448	A	0.25472	0.2552	0.380146
BOPA2_12_30968	1H	939024	G	0.93962	0.93962	C	0.06038	0.06038	0.113469
JHI-Hv50k-2016-912	1H	939905	T	0.59811	0.59811	C	0.40189	0.40189	0.480749
BOPA1_8670-388	1H	940441	C	0.59811	0.59924	G	0.4	0.40076	0.480303
JHI-Hv50k-2016-752	1H	946524	T	0.56038	0.56144	C	0.43774	0.43856	0.49245
SCRI_RS_120053	1H	1025257	C	0.78302	0.78598	T	0.21321	0.21402	0.336431
JHI-Hv50k-2016-2693	1H	1246418	T	0.79057	0.80268	C	0.19434	0.19732	0.31677
SCRI_RS_142714	1H	1275212	A	0.54151	0.54459	G	0.45283	0.45541	0.496023
JHI-Hv50k-2016-2374	1H	1369132	G	0.93208	0.93208	A	0.06792	0.06792	0.126614
JHI-Hv50k-2016-2345	1H	1371015	C	0.32453	0.67717	G	0.15472	0.32283	0.437222
JHI-Hv50k-2016-2322	1H	1372955	A	0.89057	0.89734	G	0.10189	0.10266	0.184242
BOPA1_6195-2137	1H	1431782	G	0.73396	0.73396	A	0.26604	0.26604	0.390525
JHI-Hv50k-2016-2199	1H	1433162	T	0.38302	0.89427	G	0.04528	0.10573	0.189102
JHI-Hv50k-2016-2146	1H	1441454	C	0.51132	0.51718	T	0.47736	0.48282	0.49941
JHI-Hv50k-2016-2092	1H	1463148	T	0.51321	0.51418	G	0.48491	0.48582	0.499598
SCRI_RS_124234	1H	1542790	T	0.83019	0.83491	C	0.16415	0.16509	0.275671
JHI-Hv50k-2016-1972	1H	1548868	A	0.73585	0.73724	G	0.26226	0.26276	0.387434
JHI-Hv50k-2016-1971	1H	1548972	C	0.77925	0.78072	T	0.21887	0.21928	0.342393
BOPA2_12_30944	1H	1565312	C	0.92075	0.9225	A	0.07736	0.0775	0.142988
BOPA1_3220-723	1H	1565457	A	0.74717	0.75285	C	0.24528	0.24715	0.372134
JHI-Hv50k-2016-1951	1H	1565569	C	0.88868	0.88868	T	0.11132	0.11132	0.197856
JHI-Hv50k-2016-1906	1H	1591235	C	0.96038	0.96038	T	0.03962	0.03962	0.0761005
JHI-Hv50k-2016-1895	1H	1591837	G	0.63208	0.63327	A	0.36604	0.36673	0.464478
JHI-Hv50k-2016-1864	1H	1750701	C	0.89623	0.89792	T	0.10189	0.10208	0.183319
JHI-Hv50k-2016-1863	1H	1750752	A	0.86226	0.87048	G	0.1283	0.12952	0.225489
JHI-Hv50k-2016-1545	1H	1904849	A	0.67358	0.68391	G	0.31132	0.31609	0.432354
BOPA1_5514-472	1H	1950468	G	0.73396	0.73674	A	0.26226	0.26326	0.387908
JHI-Hv50k-2016-1677	1H	1950599	C	0.90566	0.90737	T	0.09245	0.09263	0.168099
JHI-Hv50k-2016-1679	1H	1950815	T	0.87736	0.88235	C	0.11698	0.11765	0.207617
JHI-Hv50k-2016-1691	1H	1951259	T	0.58302	0.58634	G	0.41132	0.41366	0.485091
BOPA2_12_30715	1H	1966053	C	0.85472	0.85472	A	0.14528	0.14528	0.248347
JHI-Hv50k-2016-1755	1H	1968189	A	0.80189	0.80798	G	0.19057	0.19202	0.310297
JHI-Hv50k-2016-1369	1H	2037649	C	0.83019	0.83019	A	0.16981	0.16981	0.281949
JHI-Hv50k-2016-1377	1H	2038420	T	0.80377	0.80682	C	0.19245	0.19318	0.311723
JHI-Hv50k-2016-1417	1H	2049810	C	0.7283	0.73384	A	0.26415	0.26616	0.390638
JHI-Hv50k-2016-1422	1H	2050073	A	0.89245	0.89583	T	0.10377	0.10417	0.186637
JHI-Hv50k-2016-1432	1H	2050881	G	0.73396	0.73396	A	0.26604	0.26604	0.390525
JHI-Hv50k-2016-1434	1H	2051080	T	0.94717	0.94896	C	0.05094	0.05104	0.0968698
SCRI_RS_113745	1H	2054356	C	0.75472	0.75901	T	0.23962	0.24099	0.365828
JHI-Hv50k-2016-1197	1H	2163594	A	0.62642	0.64341	G	0.34717	0.35659	0.458867
JHI-Hv50k-2016-1198	1H	2163664	G	0.7717	0.77609	A	0.22264	0.22391	0.347549
JHI-Hv50k-2016-1218	1H	2166119	A	0.61509	0.61742	G	0.38113	0.38258	0.472425
SCRI_RS_120059	1H	2417178	C	0.78302	0.7845	T	0.21509	0.2155	0.33812
JHI-Hv50k-2016-2855	1H	2520652	T	0.50189	0.50958	A	0.48302	0.49042	0.499816
JHI-Hv50k-2016-2914	1H	2575967	C	0.68679	0.68679	T	0.31321	0.31321	0.430219
JHI-Hv50k-2016-2931	1H	2576882	A	0.86226	0.87048	G	0.1283	0.12952	0.225489
BOPA2_12_11311	1H	2581192	G	0.98113	0.98113	A	0.01887	0.01887	0.0370278
JHI-Hv50k-2016-3093	1H	2587010	A	0.88679	0.89354	G	0.10566	0.10646	0.190253
JHI-Hv50k-2016-3260	1H	2954752	C	0.90377	0.93372	A	0.06415	0.06628	0.123774
JHI-Hv50k-2016-3293	1H	2955953	A	0.86038	0.86857	G	0.13019	0.13143	0.228312
JHI-Hv50k-2016-3532	1H	3453791	A	0.65472	0.9013	G	0.0717	0.0987	0.177917
JHI-Hv50k-2016-6144	1H	3466751	C	0.66604	0.92408	T	0.05472	0.07592	0.140312
JHI-Hv50k-2016-6159	1H	3467535	C	0.88868	0.91992	T	0.07736	0.08008	0.147334
JHI-Hv50k-2016-6206	1H	3470194	G	0.73962	0.75676	A	0.23774	0.24324	0.368149
JHI-Hv50k-2016-6222	1H	3470523	G	0.70189	0.71954	C	0.27358	0.28046	0.403604
JHI-Hv50k-2016-6236	1H	3471221	C	0.73208	0.74472	T	0.25094	0.25528	0.380224
JHI-Hv50k-2016-6497	1H	3530490	G	0.50189	0.51852	C	0.46604	0.48148	0.499314
JHI-Hv50k-2016-6496	1H	3530557	T	0.89057	0.92008	C	0.07736	0.07992	0.147066
JHI-Hv50k-2016-6448	1H	3533317	A	0.93019	0.94084	G	0.05849	0.05916	0.11132
JHI-Hv50k-2016-6447	1H	3533448	G	0.96981	0.97905	T	0.02075	0.02095	0.0410222
JHI-Hv50k-2016-6438	1H	3533674	A	0.87358	0.89555	G	0.10189	0.10445	0.18708
JHI-Hv50k-2016-6437	1H	3533728	T	0.6	0.61036	C	0.38302	0.38964	0.475641
JHI-Hv50k-2016-6424	1H	3534275	C	0.85849	0.86832	T	0.13019	0.13168	0.228681
JHI-Hv50k-2016-6421	1H	3534427	G	0.50755	0.51631	C	0.47547	0.48369	0.499468
JHI-Hv50k-2016-6373	1H	3577496	C	0.88679	0.90385	A	0.09434	0.09615	0.17381
JHI-Hv50k-2016-6679	1H	3611095	T	0.7283	0.74231	C	0.25283	0.25769	0.382572
JHI-Hv50k-2016-6656	1H	3612069	C	0.79811	0.92157	T	0.06792	0.07843	0.144557
JHI-Hv50k-2016-6652	1H	3612184	T	0.80189	0.87629	C	0.11321	0.12371	0.216812
JHI-Hv50k-2016-6626	1H	3614405	G	0.45849	0.95294	T	0.02264	0.04706	0.0896907
JHI-Hv50k-2016-6625	1H	3614479	G	0.73585	0.74286	A	0.25472	0.25714	0.382038
JHI-Hv50k-2016-6607	1H	3615157	A	0.88868	0.89714	G	0.10189	0.10286	0.18456
JHI-Hv50k-2016-6527	1H	3712539	G	0.96226	0.96226	T	0.03774	0.03774	0.0726314
JHI-Hv50k-2016-6529	1H	3712882	T	0.92075	0.9313	C	0.06792	0.0687	0.127961
JHI-Hv50k-2016-6532	1H	3713200	A	0.85472	0.85958	G	0.13962	0.14042	0.241404
JHI-Hv50k-2016-6533	1H	3713258	A	0.85472	0.85633	G	0.1434	0.14367	0.246058
JHI-Hv50k-2016-6534	1H	3713319	G	0.85472	0.85958	A	0.13962	0.14042	0.241404
JHI-Hv50k-2016-6543	1H	3713927	C	0.86981	0.87476	T	0.12453	0.12524	0.21911
JHI-Hv50k-2016-6556	1H	3715944	G	0.7717	0.77609	A	0.22264	0.22391	0.347549
SCRI_RS_198544	1H	3716184	G	0.75094	0.75522	A	0.2434	0.24478	0.369726
JHI-Hv50k-2016-7067	1H	3804543	T	0.98491	0.98491	C	0.01509	0.01509	0.0297246
JHI-Hv50k-2016-7066	1H	3804667	G	0.79434	0.79584	A	0.20377	0.20416	0.324957
BOPA2_12_30933	1H	3805296	G	0.53019	0.5322	A	0.46604	0.4678	0.497926
BOPA2_12_11011	1H	3805610	G	0.91698	0.91871	A	0.08113	0.08129	0.149364
SCRI_RS_179144	1H	3806595	A	0.66604	0.6673	G	0.33208	0.3327	0.444021
JHI-Hv50k-2016-7035	1H	3807340	C	0.71698	0.72658	T	0.26981	0.27342	0.397323
JHI-Hv50k-2016-7033	1H	3807400	A	0.6566	0.65909	G	0.33962	0.34091	0.449381
JHI-Hv50k-2016-7025	1H	3807725	T	0.92075	0.92075	C	0.07925	0.07925	0.145939
JHI-Hv50k-2016-6897	1H	3816077	A	0.91887	0.95303	C	0.04528	0.04697	0.0895276
JHI-Hv50k-2016-6845	1H	3818301	A	0.88302	0.88302	G	0.11698	0.11698	0.206591
JHI-Hv50k-2016-6838	1H	3818855	C	0.96604	0.96604	T	0.03396	0.03396	0.0656134
JHI-Hv50k-2016-6091	1H	4228377	A	0.40943	0.99541	G	0.00189	0.00459	0.00913786
JHI-Hv50k-2016-6057	1H	4246522	G	0.93962	0.95038	A	0.04906	0.04962	0.0943157
JHI-Hv50k-2016-6050	1H	4247089	A	0.96981	0.97164	G	0.0283	0.02836	0.0551114
JHI-Hv50k-2016-6049	1H	4247296	A	0.90566	0.90566	G	0.09434	0.09434	0.17088
JHI-Hv50k-2016-6041	1H	4247692	A	0.87547	0.87879	C	0.12075	0.12121	0.213036
JHI-Hv50k-2016-6030	1H	4249516	T	0.88679	0.89015	C	0.10943	0.10985	0.195566
JHI-Hv50k-2016-5993	1H	4253461	G	0.70566	0.71103	A	0.28679	0.28897	0.410933
JHI-Hv50k-2016-5960	1H	4258427	A	0.63208	0.63447	G	0.36415	0.36553	0.463836
JHI-Hv50k-2016-5929	1H	4261495	G	0.79434	0.88075	C	0.10755	0.11925	0.210059
JHI-Hv50k-2016-5927	1H	4261655	A	0.94528	0.96161	G	0.03774	0.03839	0.0738324
JHI-Hv50k-2016-5784	1H	4308567	T	0.88679	0.89354	A	0.10566	0.10646	0.190253
SCRI_RS_194326	1H	4405317	G	0.83019	0.8365	C	0.16226	0.1635	0.273535
JHI-Hv50k-2016-5633	1H	4473327	G	0.96038	0.96038	C	0.03962	0.03962	0.0761005
JHI-Hv50k-2016-5663	1H	4478386	G	0.64151	0.64272	A	0.3566	0.35728	0.459262
JHI-Hv50k-2016-5674	1H	4479349	C	0.96038	0.96219	T	0.03774	0.03781	0.0727608
JHI-Hv50k-2016-5675	1H	4479431	A	0.90377	0.90548	G	0.09434	0.09452	0.171172
BOPA2_12_31144	1H	4612745	A	0.78868	0.79771	G	0.2	0.20229	0.322738
JHI-Hv50k-2016-5369	1H	4612863	T	0.76038	0.76326	C	0.23585	0.23674	0.361388
JHI-Hv50k-2016-5404	1H	4614371	G	0.95094	0.95274	A	0.04717	0.04726	0.090053
JHI-Hv50k-2016-5409	1H	4616251	T	0.6	0.60687	C	0.38868	0.39313	0.477158
BOPA1_4456-443	1H	4616251	A	0.59623	0.60421	G	0.39057	0.39579	0.478281
JHI-Hv50k-2016-5448	1H	4634007	C	0.49811	0.50286	T	0.49245	0.49714	0.499984
SCRI_RS_207257	1H	4635988	A	0.63396	0.63636	G	0.36226	0.36364	0.462812
JHI-Hv50k-2016-5486	1H	4636344	C	0.54151	0.54563	G	0.45094	0.45437	0.495836
JHI-Hv50k-2016-5493	1H	4636759	T	0.83962	0.8428	G	0.1566	0.1572	0.264976
JHI-Hv50k-2016-5571	1H	4649543	T	0.90566	0.90737	C	0.09245	0.09263	0.168099
JHI-Hv50k-2016-5579	1H	4650505	C	0.90755	0.90755	T	0.09245	0.09245	0.167806
JHI-Hv50k-2016-5139	1H	4798466	T	0.85849	0.86174	C	0.13774	0.13826	0.238288
JHI-Hv50k-2016-5157	1H	4799419	G	0.52264	0.52863	C	0.46604	0.47137	0.498361
JHI-Hv50k-2016-5180	1H	4800356	G	0.64151	0.64762	A	0.34906	0.35238	0.456417
JHI-Hv50k-2016-5228	1H	4806091	G	0.87925	0.88258	A	0.11698	0.11742	0.207265
JHI-Hv50k-2016-5246	1H	4807006	C	0.83774	0.84571	A	0.15283	0.15429	0.260969
JHI-Hv50k-2016-5286	1H	4817979	G	0.89811	0.89981	A	0.1	0.10019	0.180304
JHI-Hv50k-2016-5042	1H	4838291	C	0.92642	0.92642	T	0.07358	0.07358	0.136332
JHI-Hv50k-2016-5040	1H	4838384	T	0.56792	0.57008	C	0.4283	0.42992	0.490178
JHI-Hv50k-2016-5030	1H	4838741	A	0.92075	0.926	C	0.07358	0.074	0.137048
JHI-Hv50k-2016-5029	1H	4838815	T	0.82264	0.84825	C	0.14717	0.15175	0.257444
JHI-Hv50k-2016-4971	1H	4849109	G	0.82453	0.83238	A	0.16604	0.16762	0.279047
JHI-Hv50k-2016-4957	1H	4850808	A	0.51509	0.52907	T	0.45849	0.47093	0.49831
JHI-Hv50k-2016-4942	1H	4853657	A	0.93585	0.93762	C	0.06226	0.06238	0.116977
BOPA2_12_10410	1H	4854215	G	0.97925	0.97925	C	0.02075	0.02075	0.0406389
JHI-Hv50k-2016-4935	1H	4854346	C	0.85472	0.86616	A	0.13208	0.13384	0.231854
JHI-Hv50k-2016-4918	1H	4864632	T	0.59057	0.59393	C	0.40377	0.40607	0.482354
JHI-Hv50k-2016-4906	1H	4865264	G	0.75849	0.77457	A	0.22075	0.22543	0.349223
JHI-Hv50k-2016-4897	1H	4868929	C	0.53396	0.53905	G	0.4566	0.46095	0.49695
BOPA2_12_10636	1H	4880881	G	0.89623	0.89623	A	0.10377	0.10377	0.186004
JHI-Hv50k-2016-4822	1H	4882186	G	0.82453	0.82765	A	0.1717	0.17235	0.285291
JHI-Hv50k-2016-4790	1H	4891285	G	0.91509	0.91509	A	0.08491	0.08491	0.155401
JHI-Hv50k-2016-4775	1H	4892078	C	0.98302	0.98302	T	0.01698	0.01698	0.0333834
JHI-Hv50k-2016-4774	1H	4892080	T	0.9	0.9017	C	0.09811	0.0983	0.177274
JHI-Hv50k-2016-4713	1H	4944559	C	0.89057	0.90249	T	0.09623	0.09751	0.176004
JHI-Hv50k-2016-4712	1H	4944574	C	0.79057	0.79356	T	0.20566	0.20644	0.327645
JHI-Hv50k-2016-4711	1H	4944630	G	0.86604	0.89474	A	0.10189	0.10526	0.188361
SCRI_RS_204348	1H	5016346	A	0.81887	0.90605	G	0.08491	0.09395	0.170247
SCRI_RS_60293	1H	5016452	G	0.78679	0.87789	A	0.10943	0.12211	0.214398
JHI-Hv50k-2016-4387	1H	5038054	C	0.97547	0.97547	T	0.02453	0.02453	0.0478566
BOPA1_3101-111	1H	5038970	A	0.66604	0.66856	G	0.33019	0.33144	0.443175
JHI-Hv50k-2016-4414	1H	5039499	A	0.87547	0.88213	C	0.11698	0.11787	0.207953
JHI-Hv50k-2016-4422	1H	5039840	A	0.97547	0.97547	G	0.02453	0.02453	0.0478566
JHI-Hv50k-2016-4426	1H	5040210	A	0.81132	0.81439	C	0.18491	0.18561	0.302318
JHI-Hv50k-2016-4445	1H	5042018	G	0.95094	0.95455	A	0.04528	0.04545	0.0867686
JHI-Hv50k-2016-4478	1H	5046637	T	0.74717	0.75142	C	0.24717	0.24858	0.373576
JHI-Hv50k-2016-4520	1H	5048489	G	0.60755	0.62042	A	0.3717	0.37958	0.470998
JHI-Hv50k-2016-4522	1H	5048809	G	0.70566	0.70566	T	0.29434	0.29434	0.415408
JHI-Hv50k-2016-4532	1H	5049248	A	0.59811	0.60038	G	0.39811	0.39962	0.479848
SCRI_RS_82277	1H	5050411	C	0.78302	0.7845	T	0.21509	0.2155	0.33812
JHI-Hv50k-2016-4599	1H	5069285	A	0.93585	0.93762	C	0.06226	0.06238	0.116977
JHI-Hv50k-2016-4622	1H	5070735	G	0.60755	0.60985	A	0.38868	0.39015	0.475866
SCRI_RS_60145	1H	5071012	C	0.59245	0.59696	T	0.4	0.40304	0.481198
JHI-Hv50k-2016-4657	1H	5076908	G	0.31132	0.53746	C	0.26792	0.46254	0.497193
SCRI_RS_149683	1H	5077360	C	0.4	0.69737	T	0.17358	0.30263	0.42209
JHI-Hv50k-2016-4298	1H	5490427	T	0.76415	0.76705	G	0.23208	0.23295	0.357369
JHI-Hv50k-2016-4216	1H	5492597	G	0.71509	0.71509	C	0.28491	0.28491	0.407473
JHI-Hv50k-2016-4209	1H	5493676	A	0.8	0.80151	G	0.19811	0.19849	0.318183
JHI-Hv50k-2016-4203	1H	5494397	A	0.89245	0.89414	G	0.10566	0.10586	0.189307
JHI-Hv50k-2016-4173	1H	5519884	T	0.69811	0.70476	C	0.29245	0.29524	0.416147
JHI-Hv50k-2016-4167	1H	5520131	A	0.9566	0.9566	G	0.0434	0.0434	0.0830329
JHI-Hv50k-2016-4166	1H	5520340	T	0.9566	0.9566	C	0.0434	0.0434	0.0830329
JHI-Hv50k-2016-4164	1H	5520528	C	0.9566	0.9566	T	0.0434	0.0434	0.0830329
JHI-Hv50k-2016-4160	1H	5521412	C	0.97547	0.97547	T	0.02453	0.02453	0.0478566
JHI-Hv50k-2016-4156	1H	5521838	A	0.71132	0.71537	C	0.28302	0.28463	0.407232
JHI-Hv50k-2016-4257	1H	5569780	T	0.97358	0.97358	C	0.02642	0.02642	0.051444
JHI-Hv50k-2016-4228	1H	5571401	C	0.58491	0.58824	A	0.40943	0.41176	0.484427
JHI-Hv50k-2016-6735	1H	5581542	G	0.91509	0.9309	A	0.06792	0.0691	0.12865
JHI-Hv50k-2016-3778	1H	5592255	A	0.73585	0.74856	C	0.24717	0.25144	0.376436
JHI-Hv50k-2016-3779	1H	5592329	G	0.84151	0.85769	A	0.13962	0.14231	0.244116
SCRI_RS_232577	1H	5592653	C	0.51698	0.52591	T	0.46604	0.47409	0.498657
JHI-Hv50k-2016-3800	1H	5593300	T	0.94906	0.95992	C	0.03962	0.04008	0.0769472
JHI-Hv50k-2016-3887	1H	5625849	C	0.62264	0.62738	T	0.36981	0.37262	0.467549
JHI-Hv50k-2016-3888	1H	5625903	C	0.51132	0.51916	T	0.47358	0.48084	0.499266
JHI-Hv50k-2016-3891	1H	5626037	A	0.51132	0.51718	G	0.47736	0.48282	0.49941
JHI-Hv50k-2016-3897	1H	5626275	A	0.50566	0.51145	C	0.48302	0.48855	0.499738
JHI-Hv50k-2016-3902	1H	5626656	C	0.87925	0.88091	T	0.11887	0.11909	0.209815
JHI-Hv50k-2016-3964	1H	5676995	G	0.71887	0.72989	A	0.26604	0.27011	0.394301
JHI-Hv50k-2016-4046	1H	5698404	A	0.42642	0.89683	G	0.04906	0.10317	0.185052
JHI-Hv50k-2016-7270	1H	5854131	T	0.88679	0.95918	G	0.03774	0.04082	0.0783075
JHI-Hv50k-2016-7266	1H	5854656	A	0.78868	0.79167	G	0.20755	0.20833	0.329857
JHI-Hv50k-2016-7265	1H	5854725	A	0.86415	0.86578	G	0.13396	0.13422	0.23241
JHI-Hv50k-2016-7264	1H	5854806	G	0.78679	0.79127	A	0.20755	0.20873	0.330324
JHI-Hv50k-2016-7263	1H	5855051	C	0.99623	0.99623	T	0.00377	0.00377	0.00751157
JHI-Hv50k-2016-7238	1H	5903740	A	0.81887	0.82042	T	0.17925	0.17958	0.294662
JHI-Hv50k-2016-7237	1H	5903919	A	0.80755	0.80755	T	0.19245	0.19245	0.310826
JHI-Hv50k-2016-7228	1H	5905342	A	0.50189	0.50474	G	0.49245	0.49526	0.499955
JHI-Hv50k-2016-7222	1H	5906126	A	0.85472	0.85633	G	0.1434	0.14367	0.246058
JHI-Hv50k-2016-7221	1H	5906283	C	0.92453	0.96078	G	0.03774	0.03922	0.0753636
JHI-Hv50k-2016-7219	1H	5906662	T	0.87736	0.91356	A	0.08302	0.08644	0.157936
JHI-Hv50k-2016-7218	1H	5906716	C	0.74717	0.77495	T	0.21698	0.22505	0.348805
JHI-Hv50k-2016-7452	1H	5943827	G	0.76038	0.76038	A	0.23962	0.23962	0.364405
JHI-Hv50k-2016-7449	1H	5944104	C	0.76415	0.77143	A	0.22642	0.22857	0.352652
JHI-Hv50k-2016-7443	1H	5944599	G	0.71698	0.71834	A	0.28113	0.28166	0.404655
JHI-Hv50k-2016-7423	1H	5945700	C	0.76981	0.77863	T	0.21887	0.22137	0.344731
JHI-Hv50k-2016-7405	1H	5967647	C	0.53774	0.5408	G	0.4566	0.4592	0.496671
JHI-Hv50k-2016-7404	1H	5967705	G	0.77358	0.77799	A	0.22075	0.22201	0.345443
JHI-Hv50k-2016-7394	1H	5967912	G	0.78868	0.79317	A	0.20566	0.20683	0.328103
JHI-Hv50k-2016-7390	1H	5967998	G	0.77358	0.77799	A	0.22075	0.22201	0.345443
JHI-Hv50k-2016-7619	1H	6022280	C	0.91132	0.91477	A	0.08491	0.08523	0.155932
JHI-Hv50k-2016-7618	1H	6022381	C	0.70943	0.70943	T	0.29057	0.29057	0.412278
JHI-Hv50k-2016-7695	1H	6144157	T	0.59434	0.59434	C	0.40566	0.40566	0.4822
SCRI_RS_162524	1H	6144440	G	0.56226	0.56333	A	0.43585	0.43667	0.491979
JHI-Hv50k-2016-7701	1H	6144923	T	0.6	0.60227	A	0.39623	0.39773	0.479082
JHI-Hv50k-2016-7843	1H	6400197	C	0.71887	0.72159	T	0.27736	0.27841	0.401796
JHI-Hv50k-2016-7841	1H	6400456	T	0.84906	0.85227	C	0.14717	0.14773	0.251812
JHI-Hv50k-2016-7793	1H	6409524	C	0.87547	0.87879	T	0.12075	0.12121	0.213036
JHI-Hv50k-2016-7758	1H	6427946	C	0.74717	0.74858	T	0.25094	0.25142	0.376416
JHI-Hv50k-2016-7757	1H	6428040	G	0.73962	0.74102	T	0.25849	0.25898	0.383819
JHI-Hv50k-2016-7755	1H	6428072	C	0.96981	0.96981	T	0.03019	0.03019	0.0585571
JHI-Hv50k-2016-7753	1H	6428198	C	0.69057	0.7052	T	0.28868	0.2948	0.415786
JHI-Hv50k-2016-7752	1H	6428316	A	0.74717	0.74858	G	0.25094	0.25142	0.376416
JHI-Hv50k-2016-7860	1H	6473679	G	0.74528	0.76255	A	0.23208	0.23745	0.362135
JHI-Hv50k-2016-7866	1H	6479600	G	0.64528	0.65392	A	0.34151	0.34608	0.452617
JHI-Hv50k-2016-7869	1H	6480036	T	0.96038	0.96038	C	0.03962	0.03962	0.0761005
JHI-Hv50k-2016-7870	1H	6480140	T	0.53962	0.53962	A	0.46038	0.46038	0.496861
JHI-Hv50k-2016-7921	1H	6628564	C	0.93396	0.94106	T	0.05849	0.05894	0.110932
JHI-Hv50k-2016-7922	1H	6628637	C	0.83585	0.83902	G	0.16038	0.16098	0.270131
JHI-Hv50k-2016-7936	1H	6630554	G	0.94151	0.94151	A	0.05849	0.05849	0.110138
JHI-Hv50k-2016-7948	1H	6633246	G	0.85849	0.86011	A	0.13962	0.13989	0.240642
JHI-Hv50k-2016-7963	1H	6637789	C	0.92264	0.92439	T	0.07547	0.07561	0.139786
JHI-Hv50k-2016-7965	1H	6637939	C	0.5283	0.5303	G	0.46792	0.4697	0.498164
BOPA1_7372-1253	1H	6638669	G	0.56981	0.57524	A	0.42075	0.42476	0.488678
JHI-Hv50k-2016-7974	1H	6638982	A	0.98491	0.98491	G	0.01509	0.01509	0.0297246
JHI-Hv50k-2016-7888	1H	6715397	G	0.91887	0.93474	A	0.06415	0.06526	0.122002
JHI-Hv50k-2016-7887	1H	6715520	G	0.91509	0.9309	A	0.06792	0.0691	0.12865
JHI-Hv50k-2016-7883	1H	6717539	G	0.75283	0.76731	A	0.2283	0.23269	0.357091
BOPA1_6949-895	1H	6725625	G	0.80566	0.80718	A	0.19245	0.19282	0.311281
SCRI_RS_184274	1H	6817553	A	0.88868	0.89374	C	0.10566	0.10626	0.189938
JHI-Hv50k-2016-8060	1H	6817863	T	0.78679	0.78828	C	0.21132	0.21172	0.333789
JHI-Hv50k-2016-8002	1H	6931684	C	0.69811	0.70076	G	0.29811	0.29924	0.419391
JHI-Hv50k-2016-7989	1H	6932542	G	0.9283	0.93006	A	0.06981	0.06994	0.130097
JHI-Hv50k-2016-7986	1H	6932737	C	0.88679	0.88679	T	0.11321	0.11321	0.200787
JHI-Hv50k-2016-7985	1H	6932738	G	0.65283	0.65283	A	0.34717	0.34717	0.453286
JHI-Hv50k-2016-7983	1H	6932847	C	0.57736	0.57845	T	0.42075	0.42155	0.487691
JHI-Hv50k-2016-8214	1H	7106206	T	0.94528	0.94528	C	0.05472	0.05472	0.103451
JHI-Hv50k-2016-8208	1H	7106353	G	0.54528	0.54631	A	0.45283	0.45369	0.495711
JHI-Hv50k-2016-8128	1H	7210122	A	0.91698	0.91871	G	0.08113	0.08129	0.149364
JHI-Hv50k-2016-8131	1H	7210388	A	0.92075	0.92075	C	0.07925	0.07925	0.145939
JHI-Hv50k-2016-8132	1H	7210503	A	0.69623	0.73069	G	0.2566	0.26931	0.393564
JHI-Hv50k-2016-8173	1H	7213381	C	0.93585	0.93585	A	0.06415	0.06415	0.12007
SCRI_RS_1929	1H	7253074	A	0.62075	0.62311	C	0.37547	0.37689	0.469688
JHI-Hv50k-2016-8306	1H	7254189	A	0.93208	0.93384	G	0.06604	0.06616	0.123566
JHI-Hv50k-2016-8325	1H	7255127	T	0.96981	0.96981	C	0.03019	0.03019	0.0585571
JHI-Hv50k-2016-8341	1H	7256062	C	0.76981	0.77127	T	0.2283	0.22873	0.352825
JHI-Hv50k-2016-8361	1H	7257134	A	0.99623	0.99623	G	0.00377	0.00377	0.00751157
JHI-Hv50k-2016-8401	1H	7408664	T	0.75094	0.75094	C	0.24906	0.24906	0.374058
JHI-Hv50k-2016-8403	1H	7409200	G	0.98302	0.98302	A	0.01698	0.01698	0.0333834
JHI-Hv50k-2016-8460	1H	7416494	A	0.92264	0.94038	G	0.05849	0.05962	0.112131
JHI-Hv50k-2016-8493	1H	7419729	A	0.70377	0.70778	G	0.29057	0.29222	0.413655
JHI-Hv50k-2016-8507	1H	7420440	C	0.99623	0.99623	T	0.00377	0.00377	0.00751157
JHI-Hv50k-2016-8602	1H	7530872	G	0.47925	0.99219	A	0.00377	0.00781	0.015498
JHI-Hv50k-2016-8609	1H	7532197	A	0.73019	0.73157	T	0.26792	0.26843	0.392751
JHI-Hv50k-2016-8618	1H	7533418	A	0.56792	0.57008	T	0.4283	0.42992	0.490178
JHI-Hv50k-2016-8627	1H	7533678	C	0.95094	0.95094	T	0.04906	0.04906	0.0933062
JHI-Hv50k-2016-8842	1H	7740910	G	0.74717	0.74717	T	0.25283	0.25283	0.377814
JHI-Hv50k-2016-8841	1H	7741021	T	0.85283	0.85283	C	0.14717	0.14717	0.251022
JHI-Hv50k-2016-8840	1H	7741171	C	0.93962	0.94318	T	0.0566	0.05682	0.107183
SCRI_RS_222250	1H	7750494	A	0.60755	0.61101	G	0.38679	0.38899	0.475354
JHI-Hv50k-2016-8809	1H	7750724	T	0.92075	0.92075	C	0.07925	0.07925	0.145939
JHI-Hv50k-2016-8804	1H	7751260	C	0.98491	0.98491	T	0.01509	0.01509	0.0297246
JHI-Hv50k-2016-8797	1H	7752237	T	0.79434	0.79735	C	0.20189	0.20265	0.323166
JHI-Hv50k-2016-8793	1H	7752498	C	0.73396	0.73535	A	0.26415	0.26465	0.389221
SCRI_RS_165792	1H	7752583	C	0.73208	0.73485	A	0.26415	0.26515	0.389691
JHI-Hv50k-2016-8791	1H	7752943	T	0.91509	0.91682	C	0.08302	0.08318	0.152522
JHI-Hv50k-2016-8786	1H	7753467	G	0.98491	0.98491	A	0.01509	0.01509	0.0297246
JHI-Hv50k-2016-8779	1H	7753665	C	0.51321	0.51321	G	0.48679	0.48679	0.499651
JHI-Hv50k-2016-8723	1H	7767432	A	0.76604	0.76894	G	0.23019	0.23106	0.355343
JHI-Hv50k-2016-8710	1H	7768368	G	0.5283	0.5303	C	0.46792	0.4697	0.498164
JHI-Hv50k-2016-8950	1H	7803569	T	0.98302	0.98302	C	0.01698	0.01698	0.0333834
JHI-Hv50k-2016-8961	1H	7804798	T	0.93774	0.93951	C	0.06038	0.06049	0.113662
JHI-Hv50k-2016-8968	1H	7805879	G	0.97547	0.98102	A	0.01887	0.01898	0.0372395
JHI-Hv50k-2016-9033	1H	7819012	T	0.96792	0.96792	C	0.03208	0.03208	0.0621017
BOPA2_12_31149	1H	7820301	G	0.89057	0.90944	A	0.08868	0.09056	0.164718
JHI-Hv50k-2016-9131	1H	7832431	G	0.89245	0.946	A	0.05094	0.054	0.102168
JHI-Hv50k-2016-9149	1H	7834139	C	0.97925	0.9811	T	0.01887	0.0189	0.0370856
JHI-Hv50k-2016-9160	1H	7835369	C	0.94528	0.94528	T	0.05472	0.05472	0.103451
JHI-Hv50k-2016-9210	1H	7884869	G	0.53208	0.53612	C	0.46038	0.46388	0.497391
JHI-Hv50k-2016-9204	1H	7885131	C	0.97925	0.98295	A	0.01698	0.01705	0.0335186
JHI-Hv50k-2016-9183	1H	7886665	C	0.96792	0.96792	A	0.03208	0.03208	0.0621017
JHI-Hv50k-2016-9238	1H	7940012	A	0.96792	0.97343	C	0.02642	0.02657	0.0517281
JHI-Hv50k-2016-9237	1H	7940077	G	0.76415	0.7685	C	0.23019	0.2315	0.355816
JHI-Hv50k-2016-9232	1H	7940702	A	0.97925	0.9811	G	0.01887	0.0189	0.0370856
JHI-Hv50k-2016-9229	1H	7947269	T	0.96604	0.96786	C	0.03208	0.03214	0.062214
JHI-Hv50k-2016-8553	1H	8143367	G	0.67736	0.68642	A	0.30943	0.31358	0.430495
JHI-Hv50k-2016-9500	1H	8194873	C	0.83962	0.84121	T	0.15849	0.15879	0.267151
SCRI_RS_134663	1H	8194952	G	0.76792	0.7723	A	0.22642	0.2277	0.351705
JHI-Hv50k-2016-9518	1H	8196318	G	0.89245	0.95556	A	0.04151	0.04444	0.0849302
JHI-Hv50k-2016-9519	1H	8196391	C	0.79623	0.82422	T	0.16981	0.17578	0.289763
JHI-Hv50k-2016-9524	1H	8196745	C	0.86415	0.86578	A	0.13396	0.13422	0.23241
JHI-Hv50k-2016-9563	1H	8199429	C	0.91509	0.91509	T	0.08491	0.08491	0.155401
JHI-Hv50k-2016-9567	1H	8200002	G	0.79811	0.80114	T	0.19811	0.19886	0.318629
JHI-Hv50k-2016-9597	1H	8211982	T	0.99434	0.99622	C	0.00377	0.00378	0.00753142
JHI-Hv50k-2016-9600	1H	8212971	A	0.93774	0.93774	C	0.06226	0.06226	0.116767
JHI-Hv50k-2016-9615	1H	8216014	T	0.91698	0.93642	C	0.06226	0.06358	0.119075
JHI-Hv50k-2016-9618	1H	8216257	C	0.77736	0.82565	T	0.16415	0.17435	0.287904
JHI-Hv50k-2016-9620	1H	8216360	G	0.9434	0.99602	A	0.00377	0.00398	0.00792832
BOPA2_12_30918	1H	8216427	A	0.56415	0.6004	G	0.37547	0.3996	0.47984
JHI-Hv50k-2016-9624	1H	8216682	A	0.99434	0.99434	G	0.00566	0.00566	0.0112559
BOPA2_12_30919	1H	8216824	G	0.57925	0.614	A	0.36415	0.386	0.474008
JHI-Hv50k-2016-9863	1H	8296464	C	0.82264	0.82264	T	0.17736	0.17736	0.291807
JHI-Hv50k-2016-9857	1H	8298835	C	0.71132	0.71402	A	0.28491	0.28598	0.408391
BOPA2_12_30952	1H	8300088	A	0.73208	0.73346	T	0.26604	0.26654	0.390993
JHI-Hv50k-2016-9842	1H	8300129	C	0.82264	0.8242	T	0.17547	0.1758	0.289789
BOPA2_12_30950	1H	8300229	A	0.94717	0.94896	G	0.05094	0.05104	0.0968698
JHI-Hv50k-2016-9748	1H	8379280	T	0.52075	0.52075	A	0.47925	0.47925	0.499139
JHI-Hv50k-2016-9731	1H	8380184	G	0.76981	0.77419	A	0.22453	0.22581	0.34964
JHI-Hv50k-2016-9721	1H	8388074	G	0.99623	0.99623	A	0.00377	0.00377	0.00751157
JHI-Hv50k-2016-9703	1H	8390162	G	0.50566	0.50662	C	0.49245	0.49338	0.499912
JHI-Hv50k-2016-9699	1H	8390877	T	0.97925	0.97925	G	0.02075	0.02075	0.0406389
JHI-Hv50k-2016-9680	1H	8394868	G	0.92642	0.92817	A	0.0717	0.07183	0.133341
JHI-Hv50k-2016-8951	1H	8451854	A	0.98302	0.98302	T	0.01698	0.01698	0.0333834
JHI-Hv50k-2016-10019	1H	8509687	G	0.76604	0.76894	A	0.23019	0.23106	0.355343
JHI-Hv50k-2016-10004	1H	8510536	G	0.50566	0.50566	C	0.49434	0.49434	0.499936
JHI-Hv50k-2016-9989	1H	8511170	C	0.96604	0.96604	G	0.03396	0.03396	0.0656134
JHI-Hv50k-2016-9987	1H	8511263	A	0.74906	0.83755	G	0.14528	0.16245	0.27212
JHI-Hv50k-2016-9983	1H	8511495	C	0.51132	0.51229	A	0.48679	0.48771	0.499698
JHI-Hv50k-2016-9963	1H	8512325	C	0.61509	0.61626	T	0.38302	0.38374	0.472967
JHI-Hv50k-2016-9956	1H	8512593	C	0.78302	0.78598	T	0.21321	0.21402	0.336431
SCRI_RS_129789	1H	8512623	C	0.78491	0.78639	T	0.21321	0.21361	0.335962
JHI-Hv50k-2016-9903	1H	8521552	A	0.85283	0.85444	G	0.14528	0.14556	0.248745
JHI-Hv50k-2016-9902	1H	8521624	A	0.97547	0.97547	G	0.02453	0.02453	0.0478566
JHI-Hv50k-2016-9240	1H	8587197	G	0.76981	0.76981	A	0.23019	0.23019	0.354405
SCRI_RS_148560	1H	8661330	G	0.57736	0.57845	T	0.42075	0.42155	0.487691
JHI-Hv50k-2016-10222	1H	9033357	A	0.83585	0.83743	G	0.16226	0.16257	0.272282
JHI-Hv50k-2016-10223	1H	9033373	G	0.51509	0.51607	C	0.48302	0.48393	0.499484
JHI-Hv50k-2016-10241	1H	9035017	A	0.99434	0.99434	C	0.00566	0.00566	0.0112559
JHI-Hv50k-2016-10265	1H	9136722	C	0.81698	0.82319	T	0.17547	0.17681	0.291096
JHI-Hv50k-2016-10262	1H	9137572	C	0.77925	0.78667	A	0.21132	0.21333	0.335641
JHI-Hv50k-2016-10260	1H	9137736	C	0.76792	0.77524	T	0.22264	0.22476	0.348486
JHI-Hv50k-2016-10280	1H	9166578	C	0.99245	0.99433	A	0.00566	0.00567	0.0112757
JHI-Hv50k-2016-10283	1H	9166923	C	0.82642	0.82955	T	0.16981	0.17045	0.282794
JHI-Hv50k-2016-10286	1H	9167187	A	0.88868	0.89036	G	0.10943	0.10964	0.195238
JHI-Hv50k-2016-10289	1H	9167212	A	0.99434	0.99434	G	0.00566	0.00566	0.0112559
JHI-Hv50k-2016-10366	1H	9446036	C	0.97547	0.97732	T	0.02264	0.02268	0.0443312
JHI-Hv50k-2016-10365	1H	9446222	C	0.85849	0.86011	T	0.13962	0.13989	0.240642
JHI-Hv50k-2016-10363	1H	9446439	A	0.63962	0.64205	G	0.3566	0.35795	0.459644
JHI-Hv50k-2016-10336	1H	9453689	G	0.57925	0.58034	A	0.41887	0.41966	0.487091
JHI-Hv50k-2016-10333	1H	9455088	C	0.99434	0.99434	T	0.00566	0.00566	0.0112559
JHI-Hv50k-2016-10330	1H	9455625	T	0.89811	0.89811	C	0.10189	0.10189	0.183017
SCRI_RS_148733	1H	9456185	G	0.59057	0.5928	A	0.40566	0.4072	0.482776
JHI-Hv50k-2016-10325	1H	9456596	C	0.96792	0.96792	T	0.03208	0.03208	0.0621017
JHI-Hv50k-2016-10164	1H	9603205	A	0.8283	0.93603	C	0.0566	0.06397	0.119756
JHI-Hv50k-2016-10419	1H	9734340	G	0.99434	0.99434	A	0.00566	0.00566	0.0112559
JHI-Hv50k-2016-10432	1H	9735919	T	0.99434	0.99434	C	0.00566	0.00566	0.0112559
JHI-Hv50k-2016-10440	1H	9737253	A	0.99434	0.99434	C	0.00566	0.00566	0.0112559
JHI-Hv50k-2016-10443	1H	9737601	G	0.99057	0.99432	T	0.00566	0.00568	0.0112955
JHI-Hv50k-2016-10445	1H	9737693	A	0.99434	0.99434	G	0.00566	0.00566	0.0112559
SCRI_RS_137023	1H	9739401	G	0.73396	0.73814	A	0.26038	0.26186	0.386579
SCRI_RS_164150	1H	9740804	C	0.83019	0.83019	T	0.16981	0.16981	0.281949
JHI-Hv50k-2016-10472	1H	9740810	T	0.96604	0.96604	C	0.03396	0.03396	0.0656134
JHI-Hv50k-2016-10491	1H	9742532	C	0.73962	0.74102	G	0.25849	0.25898	0.383819
JHI-Hv50k-2016-10391	1H	9833943	A	0.83962	0.85907	G	0.13774	0.14093	0.242137
JHI-Hv50k-2016-10570	1H	10179999	C	0.52075	0.52273	T	0.47547	0.47727	0.498967
JHI-Hv50k-2016-10678	1H	10398847	G	0.86604	0.96632	A	0.03019	0.03368	0.0650913
JHI-Hv50k-2016-10692	1H	10400211	C	0.76981	0.78011	T	0.21698	0.21989	0.343077
JHI-Hv50k-2016-10645	1H	10425546	T	0.93396	0.9375	C	0.06226	0.0625	0.117188
JHI-Hv50k-2016-10643	1H	10425721	T	0.96981	0.96981	C	0.03019	0.03019	0.0585571
JHI-Hv50k-2016-10642	1H	10425772	G	0.9	0.9	T	0.1	0.1	0.18
JHI-Hv50k-2016-10609	1H	10452881	T	0.70189	0.70455	C	0.29434	0.29545	0.416319
JHI-Hv50k-2016-10800	1H	10477515	T	0.53396	0.53802	G	0.45849	0.46198	0.497109
JHI-Hv50k-2016-10782	1H	10478874	G	0.81132	0.81285	A	0.18679	0.18715	0.30425
JHI-Hv50k-2016-10780	1H	10478972	A	0.65472	0.70961	G	0.26792	0.29039	0.412127
JHI-Hv50k-2016-10779	1H	10479128	C	0.73019	0.73157	T	0.26792	0.26843	0.392751
JHI-Hv50k-2016-10875	1H	10562310	T	0.84717	0.84717	G	0.15283	0.15283	0.258946
JHI-Hv50k-2016-10930	1H	10564680	C	0.70377	0.71731	A	0.27736	0.28269	0.405553
JHI-Hv50k-2016-10958	1H	10565496	C	0.94151	0.94151	T	0.05849	0.05849	0.110138
JHI-Hv50k-2016-10989	1H	10749426	C	0.75472	0.77519	G	0.21887	0.22481	0.348541
JHI-Hv50k-2016-10993	1H	10749603	A	0.38113	0.82449	C	0.08113	0.17551	0.289412
JHI-Hv50k-2016-10994	1H	10749660	T	0.69434	0.72727	C	0.26038	0.27273	0.396697
SCRI_RS_130600	1H	10750037	A	0.79245	0.79545	G	0.20377	0.20455	0.325419
SCRI_RS_130592	1H	10750339	G	0.58113	0.58333	A	0.41509	0.41667	0.486112
JHI-Hv50k-2016-11028	1H	10755639	C	0.79623	0.81154	T	0.18491	0.18846	0.305886
SCRI_RS_169942	1H	10762796	G	0.73585	0.73724	A	0.26226	0.26276	0.387434
JHI-Hv50k-2016-11098	1H	10789273	T	0.77736	0.77883	G	0.22075	0.22117	0.344508
JHI-Hv50k-2016-11134	1H	10810914	A	0.91132	0.91132	G	0.08868	0.08868	0.161632
JHI-Hv50k-2016-11135	1H	10811018	G	0.77925	0.78072	A	0.21887	0.21928	0.342393
JHI-Hv50k-2016-11139	1H	10811118	G	0.78113	0.78113	C	0.21887	0.21887	0.341932
JHI-Hv50k-2016-11149	1H	10819077	G	0.51698	0.51796	C	0.48113	0.48204	0.499355
JHI-Hv50k-2016-11188	1H	10836085	A	0.78868	0.79317	G	0.20566	0.20683	0.328103
JHI-Hv50k-2016-11190	1H	10836226	C	0.99245	0.99433	T	0.00566	0.00567	0.0112757
JHI-Hv50k-2016-11201	1H	10837791	A	0.96038	0.96219	G	0.03774	0.03781	0.0727608
JHI-Hv50k-2016-11234	1H	11088468	G	0.93208	0.93208	A	0.06792	0.06792	0.126614
JHI-Hv50k-2016-11230	1H	11088618	C	0.99434	0.99434	T	0.00566	0.00566	0.0112559
JHI-Hv50k-2016-11229	1H	11088757	T	0.52642	0.52741	A	0.4717	0.47259	0.498497
JHI-Hv50k-2016-11221	1H	11089084	T	0.89057	0.89225	C	0.10755	0.10775	0.19228
JHI-Hv50k-2016-11545	1H	11336990	G	0.92264	0.99593	T	0.00377	0.00407	0.00810687
JHI-Hv50k-2016-11528	1H	11338005	T	0.69811	0.70076	C	0.29811	0.29924	0.419391
JHI-Hv50k-2016-11522	1H	11338636	T	0.97925	0.98669	C	0.01321	0.01331	0.0262657
JHI-Hv50k-2016-11520	1H	11338841	G	0.99623	0.99623	A	0.00377	0.00377	0.00751157
JHI-Hv50k-2016-11495	1H	11343308	G	0.8	0.80303	A	0.19623	0.19697	0.316346
SCRI_RS_182656	1H	11457754	A	0.5434	0.55172	G	0.44151	0.44828	0.49465
BOPA2_12_30948	1H	11666190	C	0.64906	0.65399	A	0.3434	0.34601	0.452574
JHI-Hv50k-2016-11249	1H	11688864	C	0.94717	0.95437	T	0.04528	0.04563	0.0870958
JHI-Hv50k-2016-11911	1H	11704556	G	0.88113	0.8828	T	0.11698	0.1172	0.206928
JHI-Hv50k-2016-11910	1H	11704613	G	0.58868	0.58979	A	0.40943	0.41021	0.483876
JHI-Hv50k-2016-11877	1H	11741075	A	0.76792	0.76938	G	0.23019	0.23062	0.354869
JHI-Hv50k-2016-11876	1H	11741114	A	0.60943	0.61174	T	0.38679	0.38826	0.475028
JHI-Hv50k-2016-11874	1H	11741467	A	0.7434	0.82083	G	0.16226	0.17917	0.294136
JHI-Hv50k-2016-11873	1H	11741523	T	0.7434	0.82083	C	0.16226	0.17917	0.294136
JHI-Hv50k-2016-11870	1H	11741723	G	0.96792	0.97343	A	0.02642	0.02657	0.0517281
JHI-Hv50k-2016-11824	1H	11752425	A	0.99623	0.99623	C	0.00377	0.00377	0.00751157
JHI-Hv50k-2016-11808	1H	11753604	C	0.99434	0.99811	T	0.00189	0.00189	0.00377286
JHI-Hv50k-2016-11778	1H	11758735	C	0.81509	0.82129	T	0.17736	0.17871	0.293545
JHI-Hv50k-2016-11776	1H	11758834	G	0.76981	0.77127	A	0.2283	0.22873	0.352825
JHI-Hv50k-2016-11753	1H	11760865	T	0.93585	0.93939	A	0.06038	0.06061	0.113873
JHI-Hv50k-2016-11739	1H	11794187	G	0.5434	0.5434	C	0.4566	0.4566	0.496233
JHI-Hv50k-2016-11736	1H	11794418	C	0.99623	0.99623	G	0.00377	0.00377	0.00751157
SCRI_RS_13972	1H	11797610	G	0.91132	0.92176	A	0.07736	0.07824	0.144237
JHI-Hv50k-2016-11714	1H	11798189	G	0.79245	0.80153	A	0.19623	0.19847	0.318159
JHI-Hv50k-2016-11704	1H	11798805	C	0.71509	0.71645	T	0.28302	0.28355	0.406299
JHI-Hv50k-2016-11687	1H	11800097	C	0.53396	0.537	G	0.46038	0.463	0.497262
SCRI_RS_152464	1H	11800097	C	0.53396	0.53598	G	0.46226	0.46402	0.497411
JHI-Hv50k-2016-11651	1H	11942220	T	0.73019	0.73157	G	0.26792	0.26843	0.392751
JHI-Hv50k-2016-11650	1H	11942485	T	0.99623	0.99623	C	0.00377	0.00377	0.00751157
JHI-Hv50k-2016-11646	1H	11942925	G	0.8283	0.8283	A	0.1717	0.1717	0.284438
SCRI_RS_189465	1H	11966316	C	0.57358	0.57905	T	0.41698	0.42095	0.487502
SCRI_RS_139220	1H	12066647	G	0.79811	0.80418	A	0.19434	0.19582	0.314949
JHI-Hv50k-2016-11970	1H	12329957	A	0.58679	0.5879	G	0.41132	0.4121	0.484547
JHI-Hv50k-2016-11974	1H	12330594	G	0.8	0.80151	A	0.19811	0.19849	0.318183
JHI-Hv50k-2016-11980	1H	12331700	T	0.83774	0.84091	G	0.15849	0.15909	0.267561
JHI-Hv50k-2016-12122	1H	12382457	G	0.79057	0.79507	A	0.20377	0.20493	0.325867
JHI-Hv50k-2016-12117	1H	12383141	T	0.79057	0.79356	C	0.20566	0.20644	0.327645
JHI-Hv50k-2016-12110	1H	12383451	G	0.73208	0.7668	A	0.22264	0.2332	0.357636
JHI-Hv50k-2016-12094	1H	12387055	A	0.77358	0.77652	G	0.22264	0.22348	0.347073
JHI-Hv50k-2016-12217	1H	12438930	C	0.90377	0.91238	A	0.08679	0.08762	0.159885
JHI-Hv50k-2016-12372	1H	12506393	C	0.84717	0.91075	A	0.08302	0.08925	0.162569
JHI-Hv50k-2016-12355	1H	12579484	T	0.86226	0.94421	C	0.05094	0.05579	0.105355
JHI-Hv50k-2016-12349	1H	12579661	C	0.7434	0.8107	A	0.17358	0.1893	0.306931
JHI-Hv50k-2016-12344	1H	12582707	A	0.73396	0.80372	C	0.17925	0.19628	0.315508
JHI-Hv50k-2016-12336	1H	12583183	A	0.69434	0.76667	G	0.21132	0.23333	0.357774
JHI-Hv50k-2016-12514	1H	12830653	T	0.7283	0.72968	C	0.26981	0.27032	0.394494
JHI-Hv50k-2016-12517	1H	12830943	A	0.68868	0.68998	C	0.30943	0.31002	0.427815
JHI-Hv50k-2016-12523	1H	12832513	A	0.83962	0.84121	G	0.15849	0.15879	0.267151
JHI-Hv50k-2016-12547	1H	12841240	T	0.51887	0.52682	A	0.46604	0.47318	0.498561
JHI-Hv50k-2016-12594	1H	12843241	C	0.69245	0.69245	T	0.30755	0.30755	0.425926
JHI-Hv50k-2016-12602	1H	12843837	A	0.97925	0.9811	G	0.01887	0.0189	0.0370856
JHI-Hv50k-2016-12642	1H	12849340	T	0.96415	0.96415	C	0.03585	0.03585	0.0691296
JHI-Hv50k-2016-12666	1H	12851523	A	0.8566	0.85985	T	0.13962	0.14015	0.241016
JHI-Hv50k-2016-12669	1H	12851647	C	0.61509	0.61742	G	0.38113	0.38258	0.472425
JHI-Hv50k-2016-12670	1H	12851895	C	0.77358	0.77652	T	0.22264	0.22348	0.347073
JHI-Hv50k-2016-12682	1H	12899945	C	0.68113	0.71912	T	0.26604	0.28088	0.403973
JHI-Hv50k-2016-12689	1H	12900334	T	0.90755	0.90926	C	0.09057	0.09074	0.165013
JHI-Hv50k-2016-12699	1H	12901338	T	0.90566	0.90737	C	0.09245	0.09263	0.168099
JHI-Hv50k-2016-12700	1H	12901455	T	0.90377	0.90548	C	0.09434	0.09452	0.171172
JHI-Hv50k-2016-12702	1H	12901509	A	0.90566	0.90737	G	0.09245	0.09263	0.168099
JHI-Hv50k-2016-12703	1H	12901620	C	0.90377	0.90548	T	0.09434	0.09452	0.171172
JHI-Hv50k-2016-12704	1H	12901628	G	0.90566	0.90737	A	0.09245	0.09263	0.168099
JHI-Hv50k-2016-12707	1H	12901852	G	0.90566	0.90737	A	0.09245	0.09263	0.168099
JHI-Hv50k-2016-12715	1H	12902391	C	0.7	0.70132	T	0.29811	0.29868	0.418941
BOPA1_2496-1916	1H	12904255	A	0.90755	0.90926	G	0.09057	0.09074	0.165013
JHI-Hv50k-2016-12736	1H	12904451	C	0.90377	0.90548	T	0.09434	0.09452	0.171172
JHI-Hv50k-2016-12773	1H	12907737	A	0.78679	0.91247	G	0.07547	0.08753	0.159737
JHI-Hv50k-2016-12802	1H	12912571	C	0.59245	0.59583	A	0.40189	0.40417	0.481633
BOPA1_10922-503	1H	12913286	A	0.53585	0.53992	G	0.4566	0.46008	0.496813
JHI-Hv50k-2016-12821	1H	12913559	A	0.93774	0.93774	G	0.06226	0.06226	0.116767
JHI-Hv50k-2016-12829	1H	12919484	T	0.50943	0.51136	A	0.48679	0.48864	0.499742
BOPA2_12_30876	1H	12925089	A	0.77925	0.77925	G	0.22075	0.22075	0.344039
BOPA2_12_30877	1H	12925261	G	0.77547	0.77694	C	0.22264	0.22306	0.346608
JHI-Hv50k-2016-12866	1H	13028904	A	0.61887	0.64567	T	0.33962	0.35433	0.457561
JHI-Hv50k-2016-12862	1H	13029145	C	0.81132	0.84479	A	0.14906	0.15521	0.26224
SCRI_RS_141877	1H	13031817	G	0.87925	0.91552	T	0.08113	0.08448	0.154686
JHI-Hv50k-2016-12926	1H	13037311	A	0.9717	0.9717	G	0.0283	0.0283	0.0549982
JHI-Hv50k-2016-12930	1H	13037545	A	0.63396	0.65882	G	0.3283	0.34118	0.449552
JHI-Hv50k-2016-12202	1H	13057870	T	0.66792	0.70659	G	0.27736	0.29341	0.414641
JHI-Hv50k-2016-12956	1H	13283661	T	0.7283	0.7283	C	0.2717	0.2717	0.395758
JHI-Hv50k-2016-12959	1H	13283765	G	0.69811	0.70076	A	0.29811	0.29924	0.419391
JHI-Hv50k-2016-12965	1H	13284305	C	0.88679	0.88847	A	0.11132	0.11153	0.198182
JHI-Hv50k-2016-12986	1H	13288359	A	0.97925	0.97925	G	0.02075	0.02075	0.0406389
JHI-Hv50k-2016-13004	1H	13296898	G	0.62642	0.62998	T	0.36792	0.37002	0.46621
JHI-Hv50k-2016-13011	1H	13297661	T	0.62642	0.62998	C	0.36792	0.37002	0.46621
JHI-Hv50k-2016-13033	1H	13298406	C	0.73774	0.74476	T	0.25283	0.25524	0.380185
SCRI_RS_189506	1H	13588202	G	0.59434	0.59659	A	0.40189	0.40341	0.481341
JHI-Hv50k-2016-13067	1H	13606328	A	0.50189	0.50763	G	0.48679	0.49237	0.499884
JHI-Hv50k-2016-13068	1H	13606531	G	0.96226	0.96226	A	0.03774	0.03774	0.0726314
JHI-Hv50k-2016-13093	1H	13617356	G	0.4566	0.96032	A	0.01887	0.03968	0.076211
JHI-Hv50k-2016-13113	1H	13622841	C	0.7566	0.76091	T	0.23774	0.23909	0.363852
JHI-Hv50k-2016-13154	1H	13660462	T	0.81321	0.81784	G	0.18113	0.18216	0.297955
JHI-Hv50k-2016-13200	1H	13749821	A	0.78302	0.78897	T	0.20943	0.21103	0.332993
JHI-Hv50k-2016-13203	1H	13749930	G	0.28679	0.64135	A	0.16038	0.35865	0.46004
SCRI_RS_4891	1H	13754913	T	0.64528	0.6465	G	0.35283	0.3535	0.457076
SCRI_RS_124926	1H	13756300	T	0.57358	0.57685	C	0.42075	0.42315	0.488188
JHI-Hv50k-2016-13227	1H	13756587	C	0.78679	0.78977	G	0.20943	0.21023	0.332067
JHI-Hv50k-2016-13229	1H	13756936	G	0.78679	0.78977	A	0.20943	0.21023	0.332067
JHI-Hv50k-2016-13232	1H	13757873	T	0.78868	0.79317	C	0.20566	0.20683	0.328103
JHI-Hv50k-2016-13237	1H	13758483	A	0.78868	0.79167	T	0.20755	0.20833	0.329857
JHI-Hv50k-2016-13238	1H	13758848	C	0.78868	0.79167	T	0.20755	0.20833	0.329857
BOPA1_6792-1945	1H	13759669	G	0.63019	0.63378	A	0.36415	0.36622	0.464206
JHI-Hv50k-2016-13258	1H	13994755	T	0.82264	0.8242	C	0.17547	0.1758	0.289789
JHI-Hv50k-2016-13262	1H	13995996	C	0.96981	0.96981	T	0.03019	0.03019	0.0585571
JHI-Hv50k-2016-13264	1H	13996083	A	0.67547	0.68061	G	0.31698	0.31939	0.43476
JHI-Hv50k-2016-13282	1H	14001124	A	0.56604	0.56604	G	0.43396	0.43396	0.491277
JHI-Hv50k-2016-13325	1H	14121681	T	0.60566	0.61612	C	0.37736	0.38388	0.473032
JHI-Hv50k-2016-13324	1H	14121744	C	0.30943	0.64314	T	0.1717	0.35686	0.459022
SCRI_RS_182603	1H	14387522	C	0.63019	0.69151	A	0.28113	0.30849	0.426648
JHI-Hv50k-2016-13405	1H	14550299	T	0.96792	0.96792	G	0.03208	0.03208	0.0621017
JHI-Hv50k-2016-13382	1H	14551504	T	0.96792	0.96792	C	0.03208	0.03208	0.0621017
JHI-Hv50k-2016-13374	1H	14551805	G	0.51509	0.51705	C	0.48113	0.48295	0.499419
JHI-Hv50k-2016-13372	1H	14551899	G	0.59811	0.60266	T	0.39434	0.39734	0.478922
SCRI_RS_138043	1H	14708014	C	0.5717	0.58269	T	0.40943	0.41731	0.486325
BOPA1_4226-570	1H	14716342	G	0.60189	0.60762	A	0.38868	0.39238	0.476836
JHI-Hv50k-2016-13437	1H	14717137	T	0.99811	0.99811	A	0.00189	0.00189	0.00377286
JHI-Hv50k-2016-13434	1H	14717606	G	0.96792	0.96792	A	0.03208	0.03208	0.0621017
JHI-Hv50k-2016-13427	1H	14719330	G	0.66415	0.66541	C	0.33396	0.33459	0.445279
JHI-Hv50k-2016-13419	1H	14721224	G	0.8	0.80151	A	0.19811	0.19849	0.318183
JHI-Hv50k-2016-13417	1H	14721878	T	0.99811	0.99811	C	0.00189	0.00189	0.00377286
JHI-Hv50k-2016-13416	1H	14721903	T	0.51698	0.51894	A	0.47925	0.48106	0.499283
JHI-Hv50k-2016-13415	1H	14722697	A	0.66415	0.66541	G	0.33396	0.33459	0.445279
JHI-Hv50k-2016-13496	1H	14802338	T	0.76038	0.76616	C	0.23208	0.23384	0.358318
JHI-Hv50k-2016-13499	1H	14802748	C	0.83019	0.83491	T	0.16415	0.16509	0.275671
JHI-Hv50k-2016-13500	1H	14803088	A	0.78679	0.79127	G	0.20755	0.20873	0.330324
SCRI_RS_14227	1H	14803310	C	0.72264	0.74225	T	0.25094	0.25775	0.38263
JHI-Hv50k-2016-13509	1H	14804153	T	0.82642	0.83112	C	0.16792	0.16888	0.280719
JHI-Hv50k-2016-13516	1H	14805795	G	0.83208	0.83523	A	0.16415	0.16477	0.275242
JHI-Hv50k-2016-13520	1H	14806270	G	0.80377	0.81143	A	0.18679	0.18857	0.306023
JHI-Hv50k-2016-13583	1H	15156973	G	0.72264	0.87244	A	0.10566	0.12756	0.222577
JHI-Hv50k-2016-13582	1H	15157173	A	0.77925	0.7973	G	0.19811	0.2027	0.323225
JHI-Hv50k-2016-13566	1H	15161178	T	0.47358	0.57175	C	0.35472	0.42825	0.489704
JHI-Hv50k-2016-13562	1H	15162776	A	0.62075	0.74603	T	0.21132	0.25397	0.378938
JHI-Hv50k-2016-13621	1H	15662529	C	0.72264	0.87045	T	0.10755	0.12955	0.225534
SCRI_RS_122490	1H	15671314	G	0.70566	0.85194	A	0.12264	0.14806	0.252276
JHI-Hv50k-2016-13699	1H	15671371	T	0.42453	0.51487	A	0.4	0.48513	0.499558
SCRI_RS_88375	1H	15672231	G	0.68868	0.82579	A	0.14528	0.17421	0.287722
JHI-Hv50k-2016-13740	1H	15673856	C	0.62264	0.75171	A	0.20566	0.24829	0.373284
JHI-Hv50k-2016-13743	1H	15674134	C	0.5434	0.65904	T	0.28113	0.34096	0.449413
JHI-Hv50k-2016-13744	1H	15674188	C	0.5434	0.65904	G	0.28113	0.34096	0.449413
JHI-Hv50k-2016-13749	1H	15674422	G	0.62264	0.75171	A	0.20566	0.24829	0.373284
JHI-Hv50k-2016-13780	1H	15873060	A	0.69811	0.84282	G	0.13019	0.15718	0.264949
JHI-Hv50k-2016-13782	1H	15873308	G	0.62264	0.75171	A	0.20566	0.24829	0.373284
JHI-Hv50k-2016-13798	1H	15875319	T	0.62075	0.75114	C	0.20566	0.24886	0.373857
JHI-Hv50k-2016-13804	1H	15876613	A	0.61887	0.75057	G	0.20566	0.24943	0.374429
JHI-Hv50k-2016-13805	1H	15876639	G	0.61887	0.75057	T	0.20566	0.24943	0.374429
SCRI_RS_150226	1H	15901914	C	0.68679	0.8254	A	0.14528	0.1746	0.28823
JHI-Hv50k-2016-13578	1H	16060021	G	0.85283	0.85932	A	0.13962	0.14068	0.241778
JHI-Hv50k-2016-13961	1H	16247260	G	0.46604	0.56264	A	0.36226	0.43736	0.492152
JHI-Hv50k-2016-14002	1H	16521221	G	0.87358	0.87524	A	0.12453	0.12476	0.21839
JHI-Hv50k-2016-14076	1H	16527364	C	0.69811	0.70209	T	0.29623	0.29791	0.418319
SCRI_RS_217160	1H	16527463	A	0.8717	0.875	G	0.12453	0.125	0.21875
JHI-Hv50k-2016-14144	1H	16590994	G	0.80566	0.82752	T	0.16792	0.17248	0.285461
JHI-Hv50k-2016-14255	1H	16639590	C	0.72264	0.72676	G	0.2717	0.27324	0.39716
JHI-Hv50k-2016-14258	1H	16639843	A	0.72264	0.72538	G	0.27358	0.27462	0.398408
JHI-Hv50k-2016-14263	1H	16640613	G	0.50566	0.50758	C	0.49057	0.49242	0.499885
SCRI_RS_171221	1H	16641944	T	0.65283	0.65779	G	0.33962	0.34221	0.450205
JHI-Hv50k-2016-14300	1H	16646774	A	0.83208	0.83365	G	0.16604	0.16635	0.277355
JHI-Hv50k-2016-14306	1H	16647820	C	0.68868	0.69392	T	0.30377	0.30608	0.42479
JHI-Hv50k-2016-14315	1H	16650471	T	0.51509	0.51803	A	0.47925	0.48197	0.49935
SCRI_RS_151047	1H	16650795	C	0.87358	0.87524	T	0.12453	0.12476	0.21839
SCRI_RS_235243	1H	16893468	G	0.75283	0.75568	T	0.2434	0.24432	0.369255
JHI-Hv50k-2016-14323	1H	16894087	G	0.71321	0.71727	A	0.28113	0.28273	0.405587
JHI-Hv50k-2016-14331	1H	16895021	C	0.77925	0.7822	T	0.21698	0.2178	0.340726
JHI-Hv50k-2016-14332	1H	16895193	G	0.77925	0.78368	A	0.21509	0.21632	0.339051
JHI-Hv50k-2016-14342	1H	16896680	C	0.74528	0.74811	G	0.25094	0.25189	0.376883
JHI-Hv50k-2016-14345	1H	16896920	A	0.83396	0.83554	G	0.16415	0.16446	0.274826
JHI-Hv50k-2016-14349	1H	16897209	T	0.50189	0.50379	A	0.49434	0.49621	0.499971
JHI-Hv50k-2016-14418	1H	16909979	C	0.86981	0.87146	T	0.1283	0.12854	0.224035
BOPA1_2901-1137	1H	16909991	G	0.86981	0.87146	A	0.1283	0.12854	0.224035
JHI-Hv50k-2016-14570	1H	17164086	C	0.8717	0.87335	T	0.12642	0.12665	0.22122
JHI-Hv50k-2016-14553	1H	17165097	C	0.7566	0.75947	T	0.23962	0.24053	0.365351
JHI-Hv50k-2016-14551	1H	17165223	A	0.75094	0.7581	G	0.23962	0.2419	0.366769
SCRI_RS_117492	1H	17167246	A	0.6	0.60342	G	0.39434	0.39658	0.478609
JHI-Hv50k-2016-14498	1H	17168905	G	0.71698	0.7197	A	0.27925	0.2803	0.403464
JHI-Hv50k-2016-14491	1H	17169046	G	0.71509	0.71917	A	0.27925	0.28083	0.403929
JHI-Hv50k-2016-14484	1H	17172719	T	0.97358	0.97358	C	0.02642	0.02642	0.051444
JHI-Hv50k-2016-14482	1H	17173241	T	0.73774	0.74476	C	0.25283	0.25524	0.380185
JHI-Hv50k-2016-14477	1H	17174096	C	0.73396	0.74095	T	0.2566	0.25905	0.383886
JHI-Hv50k-2016-14476	1H	17174187	G	0.85094	0.85255	A	0.14717	0.14745	0.251417
JHI-Hv50k-2016-14473	1H	17174364	G	0.76792	0.77969	A	0.21698	0.22031	0.343547
JHI-Hv50k-2016-14629	1H	17436447	C	0.50943	0.51136	G	0.48679	0.48864	0.499742
JHI-Hv50k-2016-14622	1H	17438476	T	0.7434	0.7448	G	0.25472	0.2552	0.380146
JHI-Hv50k-2016-14617	1H	17440810	G	0.50943	0.51136	C	0.48679	0.48864	0.499742
JHI-Hv50k-2016-14614	1H	17441137	G	0.93774	0.93951	A	0.06038	0.06049	0.113662
JHI-Hv50k-2016-14603	1H	17509468	T	0.53962	0.54064	A	0.45849	0.45936	0.496697
JHI-Hv50k-2016-14602	1H	17509734	A	0.93774	0.93951	G	0.06038	0.06049	0.113662
JHI-Hv50k-2016-14601	1H	17509796	G	0.93774	0.93951	A	0.06038	0.06049	0.113662
JHI-Hv50k-2016-14597	1H	17509987	G	0.93774	0.93951	A	0.06038	0.06049	0.113662
BOPA1_1906-429	1H	17570246	A	0.70377	0.70778	G	0.29057	0.29222	0.413655
JHI-Hv50k-2016-14718	1H	17599315	A	0.70377	0.70644	G	0.29245	0.29356	0.414765
JHI-Hv50k-2016-14717	1H	17599459	A	0.93208	0.93916	G	0.06038	0.06084	0.114277
BOPA1_5318-436	1H	17650559	C	0.50943	0.51136	A	0.48679	0.48864	0.499742
JHI-Hv50k-2016-14691	1H	17651403	T	0.83962	0.8428	C	0.1566	0.1572	0.264976
JHI-Hv50k-2016-14683	1H	17652053	G	0.69623	0.69886	T	0.3	0.30114	0.420909
SCRI_RS_155382	1H	17652182	T	0.53962	0.54269	C	0.45472	0.45731	0.496355
JHI-Hv50k-2016-14681	1H	17652381	A	0.80189	0.80492	G	0.19434	0.19508	0.314048
JHI-Hv50k-2016-14675	1H	17654657	A	0.83208	0.8384	G	0.16038	0.1616	0.270971
JHI-Hv50k-2016-14899	1H	17721396	A	0.77358	0.77652	C	0.22264	0.22348	0.347073
JHI-Hv50k-2016-14903	1H	17723550	A	0.74717	0.75	G	0.24906	0.25	0.375
JHI-Hv50k-2016-14904	1H	17723643	C	0.55849	0.55955	T	0.43962	0.44045	0.492908
JHI-Hv50k-2016-14906	1H	17724769	T	0.7566	0.75947	G	0.23962	0.24053	0.365351
JHI-Hv50k-2016-14907	1H	17725601	C	0.75283	0.75856	T	0.23962	0.24144	0.366293
JHI-Hv50k-2016-14793	1H	17800992	A	0.81509	0.82129	G	0.17736	0.17871	0.293545
JHI-Hv50k-2016-14788	1H	17801323	C	0.51887	0.51887	G	0.48113	0.48113	0.499288
JHI-Hv50k-2016-14929	1H	17846898	T	0.80189	0.80645	A	0.19245	0.19355	0.312177
JHI-Hv50k-2016-14930	1H	17846950	C	0.52075	0.52273	G	0.47547	0.47727	0.498967
JHI-Hv50k-2016-14932	1H	17847065	T	0.55472	0.55787	C	0.43962	0.44213	0.493302
JHI-Hv50k-2016-14933	1H	17847179	T	0.81698	0.82163	G	0.17736	0.17837	0.293108
JHI-Hv50k-2016-15016	1H	17880752	G	0.81887	0.82824	A	0.16981	0.17176	0.284517
JHI-Hv50k-2016-15013	1H	17880878	C	0.82075	0.82231	T	0.17736	0.17769	0.292233
JHI-Hv50k-2016-15012	1H	17880931	C	0.98113	0.98299	T	0.01698	0.01701	0.0334413
JHI-Hv50k-2016-15008	1H	17881318	G	0.81887	0.82197	A	0.17736	0.17803	0.292671
JHI-Hv50k-2016-14950	1H	17887464	C	0.9283	0.93006	T	0.06981	0.06994	0.130097
SCRI_RS_123187	1H	17887910	C	0.78868	0.79468	T	0.20377	0.20532	0.326327
JHI-Hv50k-2016-15025	1H	17975979	C	0.81132	0.81285	A	0.18679	0.18715	0.30425
JHI-Hv50k-2016-15026	1H	17976497	C	0.98113	0.98113	T	0.01887	0.01887	0.0370278
JHI-Hv50k-2016-15027	1H	17976777	C	0.55472	0.55787	T	0.43962	0.44213	0.493302
JHI-Hv50k-2016-15028	1H	17976823	T	0.81887	0.82197	A	0.17736	0.17803	0.292671
JHI-Hv50k-2016-15029	1H	17976902	G	0.81698	0.82163	C	0.17736	0.17837	0.293108
JHI-Hv50k-2016-15033	1H	17977422	A	0.57547	0.57765	G	0.42075	0.42235	0.487941
JHI-Hv50k-2016-15043	1H	17978139	C	0.51321	0.51515	G	0.48302	0.48485	0.499541
JHI-Hv50k-2016-15048	1H	17978246	C	0.56038	0.5625	T	0.43585	0.4375	0.492188
JHI-Hv50k-2016-15050	1H	17978347	C	0.56415	0.56415	A	0.43585	0.43585	0.49177
JHI-Hv50k-2016-15051	1H	17978402	G	0.56226	0.56333	A	0.43585	0.43667	0.491979
JHI-Hv50k-2016-15062	1H	17978999	G	0.81887	0.82197	A	0.17736	0.17803	0.292671
JHI-Hv50k-2016-15065	1H	17979282	G	0.98113	0.98299	A	0.01698	0.01701	0.0334413
JHI-Hv50k-2016-15066	1H	17979426	G	0.98113	0.98113	A	0.01887	0.01887	0.0370278
JHI-Hv50k-2016-15067	1H	17979538	C	0.50189	0.50379	G	0.49434	0.49621	0.499971
JHI-Hv50k-2016-15072	1H	17979774	G	0.98113	0.98113	A	0.01887	0.01887	0.0370278
JHI-Hv50k-2016-15073	1H	17979826	T	0.55849	0.56167	C	0.43585	0.43833	0.492394
JHI-Hv50k-2016-15075	1H	17979923	T	0.56038	0.5625	C	0.43585	0.4375	0.492188
JHI-Hv50k-2016-15082	1H	17980129	C	0.55849	0.56167	G	0.43585	0.43833	0.492394
JHI-Hv50k-2016-15099	1H	17980860	T	0.56226	0.56546	G	0.43208	0.43454	0.49143
JHI-Hv50k-2016-15113	1H	17993360	C	0.82453	0.82765	T	0.1717	0.17235	0.285291
JHI-Hv50k-2016-15116	1H	17993604	A	0.65472	0.6597	T	0.33774	0.3403	0.448992
JHI-Hv50k-2016-15117	1H	17993739	G	0.76038	0.76616	T	0.23208	0.23384	0.358318
JHI-Hv50k-2016-15118	1H	17993922	T	0.96792	0.96975	C	0.03019	0.03025	0.0586699
JHI-Hv50k-2016-15129	1H	17996392	C	0.9717	0.9717	T	0.0283	0.0283	0.0549982
JHI-Hv50k-2016-15134	1H	18003004	G	0.52642	0.52642	C	0.47358	0.47358	0.498604
JHI-Hv50k-2016-15135	1H	18003268	G	0.58491	0.58601	A	0.41321	0.41399	0.485205
JHI-Hv50k-2016-15136	1H	18003481	T	0.96415	0.97148	C	0.0283	0.02852	0.0554132
JHI-Hv50k-2016-15143	1H	18003915	C	0.9717	0.9717	G	0.0283	0.0283	0.0549982
JHI-Hv50k-2016-15144	1H	18003978	G	0.82642	0.83112	T	0.16792	0.16888	0.280719
JHI-Hv50k-2016-15145	1H	18003996	T	0.60943	0.61759	C	0.37736	0.38241	0.472345
JHI-Hv50k-2016-15149	1H	18007157	C	0.64528	0.64773	T	0.35094	0.35227	0.456352
JHI-Hv50k-2016-15151	1H	18007408	G	0.96604	0.96604	A	0.03396	0.03396	0.0656134
JHI-Hv50k-2016-15152	1H	18007546	C	0.9717	0.9717	T	0.0283	0.0283	0.0549982
BOPA1_5194-1118	1H	18007672	G	0.61698	0.62049	C	0.37736	0.37951	0.470964
JHI-Hv50k-2016-15160	1H	18008012	C	0.96981	0.97164	T	0.0283	0.02836	0.0551114
JHI-Hv50k-2016-15164	1H	18008176	A	0.79623	0.82583	C	0.16792	0.17417	0.28767
JHI-Hv50k-2016-15183	1H	18048168	G	0.52453	0.52453	C	0.47547	0.47547	0.498797
JHI-Hv50k-2016-15195	1H	18048618	G	0.96981	0.96981	A	0.03019	0.03019	0.0585571
JHI-Hv50k-2016-15198	1H	18049005	A	0.58868	0.59316	G	0.40377	0.40684	0.482642
JHI-Hv50k-2016-15206	1H	18050421	C	0.52264	0.52462	G	0.47358	0.47538	0.498788
JHI-Hv50k-2016-15222	1H	18100106	A	0.96981	0.97164	C	0.0283	0.02836	0.0551114
JHI-Hv50k-2016-15232	1H	18100324	C	0.86981	0.87146	T	0.1283	0.12854	0.224035
JHI-Hv50k-2016-15252	1H	18103745	A	0.41698	0.90204	G	0.04528	0.09796	0.176728
JHI-Hv50k-2016-15254	1H	18103838	T	0.73019	0.73157	C	0.26792	0.26843	0.392751
JHI-Hv50k-2016-15255	1H	18103891	T	0.81698	0.8343	C	0.16226	0.1657	0.276487
JHI-Hv50k-2016-15256	1H	18103945	C	0.45849	0.96047	T	0.01887	0.03953	0.0759348
SCRI_RS_176084	1H	18313787	G	0.83962	0.84121	C	0.15849	0.15879	0.267151
JHI-Hv50k-2016-15283	1H	18314036	A	0.7717	0.77462	G	0.22453	0.22538	0.349168
JHI-Hv50k-2016-15302	1H	18461370	T	0.70566	0.70833	C	0.29057	0.29167	0.413197
JHI-Hv50k-2016-15319	1H	18564561	G	0.79057	0.83135	C	0.16038	0.16865	0.280414
JHI-Hv50k-2016-15317	1H	18564773	T	0.66226	0.66477	G	0.33396	0.33523	0.445702
BOPA1_6081-850	1H	18565020	A	0.66415	0.66793	C	0.33019	0.33207	0.443599
JHI-Hv50k-2016-15341	1H	18678248	T	0.52453	0.53462	A	0.4566	0.46538	0.497603
JHI-Hv50k-2016-15328	1H	18704476	T	0.76604	0.88261	C	0.10189	0.11739	0.207219
JHI-Hv50k-2016-15327	1H	18704862	G	0.83585	0.83585	A	0.16415	0.16415	0.27441
JHI-Hv50k-2016-15324	1H	18706696	A	0.83585	0.83585	G	0.16415	0.16415	0.27441
JHI-Hv50k-2016-15323	1H	18709041	C	0.83396	0.83554	T	0.16415	0.16446	0.274826
JHI-Hv50k-2016-15322	1H	18709771	T	0.65283	0.65406	A	0.34528	0.34594	0.452531
JHI-Hv50k-2016-15127	1H	18795528	G	0.95094	0.97864	A	0.02075	0.02136	0.0418075
JHI-Hv50k-2016-15348	1H	18841080	T	0.78113	0.78261	C	0.21698	0.21739	0.340263
JHI-Hv50k-2016-15349	1H	18841317	A	0.82453	0.82765	G	0.1717	0.17235	0.285291
JHI-Hv50k-2016-15350	1H	18841384	G	0.83019	0.8365	A	0.16226	0.1635	0.273535
JHI-Hv50k-2016-15419	1H	18933715	A	0.66415	0.6835	G	0.30755	0.3165	0.432655
JHI-Hv50k-2016-15414	1H	18935209	C	0.57358	0.59144	T	0.39623	0.40856	0.483277
JHI-Hv50k-2016-15410	1H	18937859	A	0.36981	0.76863	G	0.11132	0.23137	0.355676
JHI-Hv50k-2016-15408	1H	18939670	G	0.60189	0.60302	A	0.39623	0.39698	0.478774
JHI-Hv50k-2016-15407	1H	18939810	C	0.72453	0.74563	A	0.24717	0.25437	0.379332
SCRI_RS_239784	1H	18939942	A	0.76604	0.78988	G	0.20377	0.21012	0.331939
SCRI_RS_150500	1H	19152602	C	0.77358	0.77652	T	0.22264	0.22348	0.347073
JHI-Hv50k-2016-15510	1H	19247539	C	0.49623	0.50095	G	0.49434	0.49905	0.499998
JHI-Hv50k-2016-15515	1H	19248026	G	0.73774	0.74335	C	0.25472	0.25665	0.381562
JHI-Hv50k-2016-15523	1H	19248678	G	0.5	0.50285	C	0.49434	0.49715	0.499984
JHI-Hv50k-2016-15529	1H	19248929	C	0.73962	0.74383	T	0.25472	0.25617	0.381094
JHI-Hv50k-2016-15574	1H	19251314	T	0.73774	0.74335	C	0.25472	0.25665	0.381562
JHI-Hv50k-2016-15598	1H	19270754	C	0.64906	0.65275	T	0.34528	0.34725	0.453335
JHI-Hv50k-2016-15633	1H	19298578	T	0.57358	0.58915	C	0.4	0.41085	0.484105
JHI-Hv50k-2016-15630	1H	19298752	T	0.71887	0.72296	G	0.27547	0.27704	0.400578
BOPA2_12_31276	1H	19314802	A	0.59434	0.59659	C	0.40189	0.40341	0.481341
JHI-Hv50k-2016-15610	1H	19332395	T	0.98491	0.98864	A	0.01132	0.01136	0.0224619
JHI-Hv50k-2016-15609	1H	19332692	T	0.59245	0.59583	G	0.40189	0.40417	0.481633
JHI-Hv50k-2016-15608	1H	19332764	T	0.59245	0.59583	C	0.40189	0.40417	0.481633
JHI-Hv50k-2016-15607	1H	19332937	G	0.71321	0.71863	A	0.27925	0.28137	0.404402
JHI-Hv50k-2016-15722	1H	19381857	C	0.66038	0.66163	T	0.33774	0.33837	0.447751
JHI-Hv50k-2016-15719	1H	19382295	G	0.68113	0.68501	A	0.31321	0.31499	0.431543
JHI-Hv50k-2016-15718	1H	19382439	A	0.98113	0.98299	G	0.01698	0.01701	0.0334413
JHI-Hv50k-2016-15715	1H	19383520	A	0.68113	0.68762	G	0.30943	0.31238	0.429597
JHI-Hv50k-2016-15711	1H	19384033	A	0.93585	0.94476	G	0.05472	0.05524	0.104377
JHI-Hv50k-2016-15710	1H	19384129	G	0.67736	0.68251	A	0.31509	0.31749	0.43338
JHI-Hv50k-2016-15708	1H	19384615	C	0.67358	0.68522	T	0.30943	0.31478	0.431387
JHI-Hv50k-2016-15707	1H	19385015	A	0.71132	0.71537	G	0.28302	0.28463	0.407232
JHI-Hv50k-2016-15705	1H	19385361	A	0.62264	0.625	G	0.37358	0.375	0.46875
JHI-Hv50k-2016-15789	1H	19884630	G	0.69811	0.70342	A	0.29434	0.29658	0.417241
JHI-Hv50k-2016-15733	1H	19925046	C	0.98302	0.98861	T	0.01132	0.01139	0.0225205
JHI-Hv50k-2016-15732	1H	19925080	C	0.6434	0.64829	T	0.34906	0.35171	0.45602
JHI-Hv50k-2016-15731	1H	19925485	T	0.62642	0.62998	C	0.36792	0.37002	0.46621
JHI-Hv50k-2016-15730	1H	19925625	T	0.36981	0.76562	C	0.11321	0.23438	0.358892
JHI-Hv50k-2016-15868	1H	20266855	C	0.55472	0.56107	G	0.43396	0.43893	0.492541
JHI-Hv50k-2016-15869	1H	20266874	C	0.71509	0.7219	T	0.27547	0.2781	0.401521
JHI-Hv50k-2016-15870	1H	20267001	T	0.73019	0.73855	C	0.25849	0.26145	0.386188
JHI-Hv50k-2016-15952	1H	20616392	T	0.62642	0.69311	C	0.27736	0.30689	0.425417
JHI-Hv50k-2016-15964	1H	20641715	G	0.48491	0.54105	C	0.41132	0.45895	0.49663
JHI-Hv50k-2016-16019	1H	20807166	G	0.63019	0.63862	A	0.3566	0.36138	0.461569
JHI-Hv50k-2016-16025	1H	20840060	A	0.63208	0.64054	T	0.35472	0.35946	0.460497
JHI-Hv50k-2016-16026	1H	20840240	G	0.36038	0.50663	A	0.35094	0.49337	0.499912
JHI-Hv50k-2016-16033	1H	20959251	T	0.55849	0.56061	G	0.43774	0.43939	0.492653
JHI-Hv50k-2016-16035	1H	20959300	A	0.57736	0.57845	G	0.42075	0.42155	0.487691
JHI-Hv50k-2016-16053	1H	20972231	A	0.47547	0.64286	C	0.26415	0.35714	0.459182
JHI-Hv50k-2016-16067	1H	21015222	A	0.72453	0.72727	G	0.2717	0.27273	0.396697
JHI-Hv50k-2016-16066	1H	21015259	G	0.52642	0.52741	C	0.4717	0.47259	0.498497
JHI-Hv50k-2016-16065	1H	21015321	T	0.63396	0.63878	C	0.35849	0.36122	0.46148
JHI-Hv50k-2016-16064	1H	21015330	T	0.62642	0.62879	C	0.36981	0.37121	0.466826
SCRI_RS_128285	1H	21078742	T	0.56604	0.56926	C	0.4283	0.43074	0.490406
JHI-Hv50k-2016-16093	1H	21083205	T	0.5717	0.57278	C	0.42642	0.42722	0.489406
JHI-Hv50k-2016-16125	1H	21467865	T	0.51509	0.51705	A	0.48113	0.48295	0.499419
JHI-Hv50k-2016-16128	1H	21468858	C	0.9717	0.97909	T	0.02075	0.02091	0.0409455
JHI-Hv50k-2016-16129	1H	21469219	T	0.70755	0.71157	C	0.28679	0.28843	0.410476
JHI-Hv50k-2016-16132	1H	21469904	G	0.97358	0.97727	A	0.02264	0.02273	0.0444267
BOPA1_3751-1136	1H	21470491	G	0.72642	0.73194	C	0.26604	0.26806	0.392408
SCRI_RS_126734	1H	21516022	T	0.70189	0.72798	C	0.26226	0.27202	0.39605
JHI-Hv50k-2016-16143	1H	21517038	G	0.91509	0.9203	A	0.07925	0.0797	0.146696
JHI-Hv50k-2016-16150	1H	21517524	C	0.61132	0.61364	T	0.38491	0.38636	0.474172
JHI-Hv50k-2016-16158	1H	21519060	T	0.67736	0.68251	C	0.31509	0.31749	0.43338
JHI-Hv50k-2016-16159	1H	21519146	G	0.73019	0.73295	A	0.26604	0.26705	0.391469
JHI-Hv50k-2016-16218	1H	21659055	A	0.71132	0.71402	G	0.28491	0.28598	0.408391
JHI-Hv50k-2016-16219	1H	21659188	A	0.81509	0.81973	T	0.17925	0.18027	0.295545
JHI-Hv50k-2016-16224	1H	21659814	G	0.71132	0.725	C	0.26981	0.275	0.39875
JHI-Hv50k-2016-16232	1H	21661789	A	0.87736	0.88068	C	0.11887	0.11932	0.210165
JHI-Hv50k-2016-16233	1H	21661877	T	0.87547	0.88213	C	0.11698	0.11787	0.207953
JHI-Hv50k-2016-16177	1H	21755023	T	0.84906	0.85066	C	0.14906	0.14934	0.254075
JHI-Hv50k-2016-16178	1H	21755115	A	0.76038	0.76471	C	0.23396	0.23529	0.359857
JHI-Hv50k-2016-16180	1H	21755739	G	0.84528	0.85009	A	0.14906	0.14991	0.254874
JHI-Hv50k-2016-16185	1H	21790794	G	0.73774	0.74053	A	0.25849	0.25947	0.384291
JHI-Hv50k-2016-16203	1H	21791825	C	0.84717	0.85687	T	0.14151	0.14313	0.245288
JHI-Hv50k-2016-16213	1H	21792038	A	0.84717	0.87354	C	0.12264	0.12646	0.220936
JHI-Hv50k-2016-16260	1H	21841397	C	0.87358	0.88697	T	0.11132	0.11303	0.200508
JHI-Hv50k-2016-16257	1H	21842382	A	0.47925	0.50699	T	0.46604	0.49301	0.499902
JHI-Hv50k-2016-16240	1H	21914825	C	0.91132	0.91304	T	0.08679	0.08696	0.158796
JHI-Hv50k-2016-16245	1H	21936462	C	0.91132	0.91304	G	0.08679	0.08696	0.158796
JHI-Hv50k-2016-16247	1H	21936466	C	0.91132	0.91304	A	0.08679	0.08696	0.158796
JHI-Hv50k-2016-16248	1H	21937021	C	0.91132	0.91304	A	0.08679	0.08696	0.158796
JHI-Hv50k-2016-16250	1H	21937673	T	0.80566	0.80871	C	0.19057	0.19129	0.309396
JHI-Hv50k-2016-16252	1H	21937778	G	0.51509	0.51607	C	0.48302	0.48393	0.499484
JHI-Hv50k-2016-16253	1H	21937863	T	0.91132	0.91304	G	0.08679	0.08696	0.158796
JHI-Hv50k-2016-16255	1H	21938039	T	0.91132	0.91304	G	0.08679	0.08696	0.158796
JHI-Hv50k-2016-16256	1H	21938040	C	0.83774	0.90798	T	0.08491	0.09202	0.167105
JHI-Hv50k-2016-16264	1H	21942349	G	0.83962	0.90631	T	0.08679	0.09369	0.169824
JHI-Hv50k-2016-16286	1H	21947475	T	0.68679	0.74438	C	0.23585	0.25562	0.380557
JHI-Hv50k-2016-16287	1H	21947521	A	0.74906	0.80527	C	0.18113	0.19473	0.31362
JHI-Hv50k-2016-16306	1H	22419301	G	0.91698	0.91871	A	0.08113	0.08129	0.149364
BOPA1_5346-1587	1H	22420885	G	0.53208	0.53612	A	0.46038	0.46388	0.497391
JHI-Hv50k-2016-16328	1H	22425893	A	0.91132	0.91477	G	0.08491	0.08523	0.155932
JHI-Hv50k-2016-16331	1H	22426721	G	0.70377	0.7051	A	0.29434	0.2949	0.415868
JHI-Hv50k-2016-16332	1H	22427203	A	0.89057	0.89225	G	0.10755	0.10775	0.19228
JHI-Hv50k-2016-16335	1H	22427866	A	0.91321	0.91667	G	0.08302	0.08333	0.152772
JHI-Hv50k-2016-16542	1H	22604217	A	0.76415	0.77143	G	0.22642	0.22857	0.352652
JHI-Hv50k-2016-16527	1H	22605534	C	0.7	0.70132	T	0.29811	0.29868	0.418941
JHI-Hv50k-2016-16526	1H	22605542	A	0.88302	0.88805	C	0.11132	0.11195	0.198834
JHI-Hv50k-2016-16524	1H	22606108	G	0.85472	0.85795	T	0.14151	0.14205	0.243744
JHI-Hv50k-2016-16521	1H	22607428	G	0.50189	0.50379	C	0.49434	0.49621	0.499971
JHI-Hv50k-2016-16518	1H	22608081	T	0.70189	0.70722	C	0.29057	0.29278	0.41412
JHI-Hv50k-2016-16517	1H	22608103	C	0.89057	0.89225	A	0.10755	0.10775	0.19228
JHI-Hv50k-2016-16516	1H	22608184	T	0.88491	0.88658	C	0.11321	0.11342	0.201112
JHI-Hv50k-2016-16514	1H	22608437	T	0.88491	0.88658	C	0.11321	0.11342	0.201112
JHI-Hv50k-2016-16510	1H	22608497	A	0.87925	0.88762	C	0.11132	0.11238	0.199501
JHI-Hv50k-2016-16509	1H	22608572	T	0.88302	0.88805	C	0.11132	0.11195	0.198834
JHI-Hv50k-2016-16508	1H	22608992	A	0.88302	0.88636	G	0.11321	0.11364	0.201452
JHI-Hv50k-2016-16507	1H	22609235	G	0.89057	0.89225	A	0.10755	0.10775	0.19228
JHI-Hv50k-2016-16506	1H	22609408	C	0.70377	0.7051	A	0.29434	0.2949	0.415868
JHI-Hv50k-2016-16505	1H	22609841	T	0.88868	0.89544	C	0.10377	0.10456	0.187254
JHI-Hv50k-2016-16504	1H	22609949	G	0.70377	0.70644	T	0.29245	0.29356	0.414765
JHI-Hv50k-2016-16500	1H	22610888	A	0.70377	0.7051	T	0.29434	0.2949	0.415868
JHI-Hv50k-2016-16499	1H	22611040	G	0.88491	0.88826	A	0.11132	0.11174	0.198508
JHI-Hv50k-2016-16498	1H	22611136	A	0.90943	0.91461	T	0.08491	0.08539	0.156197
JHI-Hv50k-2016-16497	1H	22611337	T	0.91321	0.91493	C	0.08491	0.08507	0.155666
JHI-Hv50k-2016-16496	1H	22611535	C	0.70189	0.70455	A	0.29434	0.29545	0.416319
JHI-Hv50k-2016-16495	1H	22611634	T	0.51887	0.52083	A	0.47736	0.47917	0.499132
JHI-Hv50k-2016-16494	1H	22611713	T	0.88302	0.88636	A	0.11321	0.11364	0.201452
JHI-Hv50k-2016-16492	1H	22612097	C	0.70377	0.7051	T	0.29434	0.2949	0.415868
JHI-Hv50k-2016-16491	1H	22612345	A	0.55094	0.55619	G	0.43962	0.44381	0.493685
JHI-Hv50k-2016-16490	1H	22612692	T	0.50189	0.50379	A	0.49434	0.49621	0.499971
JHI-Hv50k-2016-16489	1H	22612884	G	0.88491	0.88658	C	0.11321	0.11342	0.201112
JHI-Hv50k-2016-16486	1H	22613017	T	0.91321	0.91493	C	0.08491	0.08507	0.155666
JHI-Hv50k-2016-16482	1H	22613517	G	0.89057	0.89225	A	0.10755	0.10775	0.19228
JHI-Hv50k-2016-16481	1H	22613601	A	0.52453	0.52952	G	0.46604	0.47048	0.498257
JHI-Hv50k-2016-16480	1H	22613761	A	0.52264	0.52762	G	0.46792	0.47238	0.498474
JHI-Hv50k-2016-16479	1H	22613880	C	0.62453	0.84872	T	0.11132	0.15128	0.256789
JHI-Hv50k-2016-16478	1H	22613981	A	0.52453	0.52852	T	0.46792	0.47148	0.498373
JHI-Hv50k-2016-16477	1H	22613984	T	0.52453	0.52852	C	0.46792	0.47148	0.498373
JHI-Hv50k-2016-16475	1H	22614282	T	0.55283	0.55703	G	0.43962	0.44297	0.493495
JHI-Hv50k-2016-16474	1H	22614308	T	0.88302	0.88636	G	0.11321	0.11364	0.201452
JHI-Hv50k-2016-16473	1H	22614432	T	0.5	0.5038	A	0.49245	0.4962	0.499971
JHI-Hv50k-2016-16472	1H	22614518	G	0.70377	0.70778	A	0.29057	0.29222	0.413655
JHI-Hv50k-2016-16470	1H	22614710	A	0.70377	0.70644	G	0.29245	0.29356	0.414765
JHI-Hv50k-2016-16469	1H	22614869	T	0.89057	0.89225	C	0.10755	0.10775	0.19228
JHI-Hv50k-2016-16468	1H	22614876	T	0.52453	0.52852	C	0.46792	0.47148	0.498373
JHI-Hv50k-2016-16467	1H	22614961	G	0.88113	0.89635	A	0.10189	0.10365	0.185813
JHI-Hv50k-2016-16466	1H	22614962	T	0.89057	0.89734	C	0.10189	0.10266	0.184242
JHI-Hv50k-2016-16465	1H	22615104	G	0.91321	0.91493	C	0.08491	0.08507	0.155666
JHI-Hv50k-2016-16464	1H	22615223	C	0.89623	0.91346	G	0.08491	0.08654	0.158102
JHI-Hv50k-2016-16462	1H	22615289	A	0.86981	0.88484	C	0.11321	0.11516	0.203796
JHI-Hv50k-2016-16461	1H	22615399	T	0.50943	0.52124	C	0.46792	0.47876	0.499098
JHI-Hv50k-2016-16460	1H	22615452	G	0.68868	0.70058	A	0.29434	0.29942	0.419535
JHI-Hv50k-2016-16459	1H	22615529	C	0.8717	0.88506	A	0.11321	0.11494	0.203458
JHI-Hv50k-2016-16456	1H	22615553	A	0.68868	0.70058	G	0.29434	0.29942	0.419535
JHI-Hv50k-2016-16451	1H	22616375	G	0.86792	0.88632	A	0.11132	0.11368	0.201514
JHI-Hv50k-2016-16450	1H	22616383	T	0.53585	0.54932	C	0.43962	0.45068	0.495135
JHI-Hv50k-2016-16449	1H	22616570	A	0.78491	0.79846	G	0.19811	0.20154	0.321843
JHI-Hv50k-2016-16448	1H	22616708	C	0.50189	0.51056	G	0.48113	0.48944	0.499777
JHI-Hv50k-2016-16446	1H	22616718	T	0.89811	0.91363	G	0.08491	0.08637	0.15782
JHI-Hv50k-2016-16445	1H	22616781	C	0.87358	0.88528	T	0.11321	0.11472	0.203119
JHI-Hv50k-2016-16444	1H	22616909	G	0.87547	0.8906	T	0.10755	0.1094	0.194863
JHI-Hv50k-2016-16442	1H	22616939	G	0.8717	0.88506	A	0.11321	0.11494	0.203458
JHI-Hv50k-2016-16437	1H	22617060	T	0.79057	0.87474	C	0.11321	0.12526	0.21914
JHI-Hv50k-2016-16414	1H	22620492	C	0.50943	0.51331	G	0.48302	0.48669	0.499646
JHI-Hv50k-2016-16413	1H	22620766	T	0.54717	0.55344	C	0.44151	0.44656	0.494288
JHI-Hv50k-2016-16405	1H	22621285	C	0.49434	0.52929	A	0.43962	0.47071	0.498284
JHI-Hv50k-2016-16404	1H	22621389	A	0.63774	0.6856	C	0.29245	0.3144	0.431105
JHI-Hv50k-2016-16403	1H	22621500	G	0.79057	0.84137	A	0.14906	0.15863	0.266933
JHI-Hv50k-2016-16401	1H	22621528	A	0.47925	0.51417	T	0.45283	0.48583	0.499598
JHI-Hv50k-2016-16400	1H	22621634	C	0.84906	0.85066	T	0.14906	0.14934	0.254075
JHI-Hv50k-2016-16399	1H	22621688	T	0.55283	0.55916	C	0.43585	0.44084	0.493
JHI-Hv50k-2016-16398	1H	22621807	A	0.93208	0.93738	G	0.06226	0.06262	0.117397
JHI-Hv50k-2016-16396	1H	22621980	G	0.6434	0.6875	A	0.29245	0.3125	0.429688
JHI-Hv50k-2016-16391	1H	22626401	A	0.57547	0.57875	G	0.41887	0.42125	0.487597
JHI-Hv50k-2016-16388	1H	22626784	G	0.59811	0.60266	A	0.39434	0.39734	0.478922
JHI-Hv50k-2016-16386	1H	22628247	C	0.94528	0.94528	A	0.05472	0.05472	0.103451
JHI-Hv50k-2016-16559	1H	22676686	G	0.57547	0.57765	C	0.42075	0.42235	0.487941
JHI-Hv50k-2016-16560	1H	22676814	A	0.65094	0.65217	G	0.34717	0.34783	0.453689
SCRI_RS_161702	1H	22676923	G	0.6283	0.63068	A	0.36792	0.36932	0.465845
SCRI_RS_116548	1H	22679665	A	0.58491	0.58824	G	0.40943	0.41176	0.484427
JHI-Hv50k-2016-16575	1H	22681214	C	0.61132	0.61364	T	0.38491	0.38636	0.474172
JHI-Hv50k-2016-16601	1H	22692131	G	0.67547	0.67675	T	0.32264	0.32325	0.437519
JHI-Hv50k-2016-16604	1H	22694432	A	0.68491	0.69011	T	0.30755	0.30989	0.427716
JHI-Hv50k-2016-16605	1H	22694469	A	0.68302	0.68691	G	0.31132	0.31309	0.430129
JHI-Hv50k-2016-16174	1H	22915320	T	0.77736	0.80312	C	0.19057	0.19688	0.316237
JHI-Hv50k-2016-16622	1H	23286490	T	0.66792	0.68872	A	0.30189	0.31128	0.42877
JHI-Hv50k-2016-16623	1H	23286517	G	0.66604	0.68945	A	0.3	0.31055	0.428217
JHI-Hv50k-2016-16624	1H	23286605	A	0.59245	0.60385	G	0.38868	0.39615	0.47843
JHI-Hv50k-2016-16625	1H	23286696	T	0.62075	0.62667	C	0.36981	0.37333	0.467909
JHI-Hv50k-2016-16626	1H	23286814	A	0.62264	0.62738	G	0.36981	0.37262	0.467549
JHI-Hv50k-2016-16644	1H	23639083	T	0.62264	0.62738	C	0.36981	0.37262	0.467549
JHI-Hv50k-2016-16641	1H	23640350	A	0.97547	0.97732	C	0.02264	0.02268	0.0443312
JHI-Hv50k-2016-16638	1H	23640604	G	0.97736	0.97736	A	0.02264	0.02264	0.0442549
JHI-Hv50k-2016-16636	1H	23640927	A	0.97547	0.97732	C	0.02264	0.02268	0.0443312
JHI-Hv50k-2016-16648	1H	23917710	C	0.68113	0.68631	T	0.31132	0.31369	0.430577
JHI-Hv50k-2016-16650	1H	23919813	G	0.50566	0.50854	C	0.48868	0.49146	0.499854
JHI-Hv50k-2016-16651	1H	23920443	G	0.68302	0.68821	A	0.30943	0.31179	0.429154
JHI-Hv50k-2016-16654	1H	23923062	A	0.62075	0.62548	G	0.3717	0.37452	0.46851
JHI-Hv50k-2016-16655	1H	23924556	G	0.61698	0.62405	A	0.3717	0.37595	0.469223
JHI-Hv50k-2016-16657	1H	23926561	G	0.62075	0.62548	A	0.3717	0.37452	0.46851
JHI-Hv50k-2016-16677	1H	26275242	T	0.78491	0.78491	C	0.21509	0.21509	0.337653
JHI-Hv50k-2016-16680	1H	26275390	A	0.90943	0.91115	G	0.08868	0.08885	0.161911
JHI-Hv50k-2016-16684	1H	26276314	T	0.58679	0.59125	G	0.40566	0.40875	0.483347
JHI-Hv50k-2016-16711	1H	26395056	T	0.58868	0.59316	A	0.40377	0.40684	0.482642
JHI-Hv50k-2016-16712	1H	26395145	G	0.81887	0.82042	A	0.17925	0.17958	0.294662
JHI-Hv50k-2016-16715	1H	26395505	C	0.58868	0.59203	G	0.40566	0.40797	0.483061
JHI-Hv50k-2016-16731	1H	26435835	T	0.58868	0.59316	C	0.40377	0.40684	0.482642
JHI-Hv50k-2016-16732	1H	26436020	T	0.60755	0.61333	C	0.38302	0.38667	0.474313
JHI-Hv50k-2016-16733	1H	26436136	C	0.51887	0.52182	G	0.47547	0.47818	0.499048
JHI-Hv50k-2016-16735	1H	26436411	T	0.85094	0.85417	G	0.14528	0.14583	0.249127
JHI-Hv50k-2016-16778	1H	26571789	C	0.58868	0.59203	T	0.40566	0.40797	0.483061
JHI-Hv50k-2016-16780	1H	26572066	C	0.60943	0.61524	T	0.38113	0.38476	0.473439
JHI-Hv50k-2016-16787	1H	26573147	C	0.61132	0.61714	T	0.37925	0.38286	0.472556
JHI-Hv50k-2016-16799	1H	26574375	C	0.61132	0.61714	T	0.37925	0.38286	0.472556
JHI-Hv50k-2016-16800	1H	26574595	C	0.60377	0.61069	T	0.38491	0.38931	0.475495
JHI-Hv50k-2016-16807	1H	26574979	C	0.60377	0.60952	T	0.38679	0.39048	0.476011
JHI-Hv50k-2016-16839	1H	27060174	T	0.66038	0.66414	G	0.33396	0.33586	0.446116
BOPA2_12_31177	1H	27060725	A	0.66038	0.66414	G	0.33396	0.33586	0.446116
JHI-Hv50k-2016-16845	1H	27062569	A	0.82453	0.82922	G	0.16981	0.17078	0.283228
JHI-Hv50k-2016-16854	1H	27064965	G	0.91132	0.91651	A	0.08302	0.08349	0.153039
JHI-Hv50k-2016-16856	1H	27065093	C	0.91887	0.93295	A	0.06604	0.06705	0.125109
JHI-Hv50k-2016-16885	1H	27298180	C	0.71321	0.74556	A	0.2434	0.25444	0.379401
JHI-Hv50k-2016-16877	1H	27367740	G	0.71132	0.71537	A	0.28302	0.28463	0.407232
JHI-Hv50k-2016-16871	1H	27369200	G	0.94906	0.95085	A	0.04906	0.04915	0.0934686
JHI-Hv50k-2016-16863	1H	27370318	C	0.75472	0.75901	T	0.23962	0.24099	0.365828
JHI-Hv50k-2016-16862	1H	27370414	G	0.93774	0.93774	A	0.06226	0.06226	0.116767
JHI-Hv50k-2016-16859	1H	27370545	G	0.94717	0.94896	A	0.05094	0.05104	0.0968698
JHI-Hv50k-2016-16943	1H	27444395	C	0.96981	0.96981	T	0.03019	0.03019	0.0585571
JHI-Hv50k-2016-16937	1H	27445293	C	0.63962	0.65825	A	0.33208	0.34175	0.449914
SCRI_RS_222748	1H	27445538	G	0.80566	0.80871	A	0.19057	0.19129	0.309396
JHI-Hv50k-2016-16935	1H	27446338	C	0.97925	0.97925	T	0.02075	0.02075	0.0406389
JHI-Hv50k-2016-16929	1H	27452743	A	0.52075	0.52174	G	0.47736	0.47826	0.499055
JHI-Hv50k-2016-16927	1H	27452959	C	0.75094	0.75522	T	0.2434	0.24478	0.369726
JHI-Hv50k-2016-16925	1H	27453059	T	0.98113	0.98113	G	0.01887	0.01887	0.0370278
JHI-Hv50k-2016-16924	1H	27453110	A	0.49434	0.51072	T	0.47358	0.48928	0.49977
JHI-Hv50k-2016-16923	1H	27453221	G	0.48868	0.50487	A	0.47925	0.49513	0.499953
JHI-Hv50k-2016-16922	1H	27453295	C	0.76415	0.79256	T	0.2	0.20744	0.328817
JHI-Hv50k-2016-16921	1H	27453436	A	0.51887	0.53711	G	0.44717	0.46289	0.497246
JHI-Hv50k-2016-16918	1H	27453528	C	0.52075	0.53801	T	0.44717	0.46199	0.49711
JHI-Hv50k-2016-16913	1H	27455193	T	0.51321	0.53333	A	0.44906	0.46667	0.497778
JHI-Hv50k-2016-16911	1H	27456438	T	0.72264	0.74805	C	0.2434	0.25195	0.376942
JHI-Hv50k-2016-16909	1H	27456501	T	0.94906	0.98051	C	0.01887	0.01949	0.0382203
JHI-Hv50k-2016-16908	1H	27456553	G	0.71698	0.74951	A	0.23962	0.25049	0.37549
JHI-Hv50k-2016-16907	1H	27456584	T	0.71887	0.74706	C	0.2434	0.25294	0.377923
JHI-Hv50k-2016-16906	1H	27456849	A	0.67547	0.70334	G	0.28491	0.29666	0.417306
JHI-Hv50k-2016-16903	1H	27457404	C	0.51132	0.53242	G	0.44906	0.46758	0.497898
BOPA1_6238-243	1H	27636684	T	0.92075	0.9225	A	0.07736	0.0775	0.142988
JHI-Hv50k-2016-16968	1H	27700028	C	0.91887	0.94015	A	0.05849	0.05985	0.112536
JHI-Hv50k-2016-16965	1H	27700251	C	0.50943	0.51136	G	0.48679	0.48864	0.499742
JHI-Hv50k-2016-16976	1H	27806560	T	0.9	0.9	G	0.1	0.1	0.18
JHI-Hv50k-2016-16991	1H	28084899	A	0.32264	0.67059	G	0.15849	0.32941	0.441798
JHI-Hv50k-2016-16996	1H	28114828	C	0.94906	0.95085	A	0.04906	0.04915	0.0934686
JHI-Hv50k-2016-16995	1H	28115299	C	0.64151	0.65259	T	0.34151	0.34741	0.453433
JHI-Hv50k-2016-17006	1H	28256389	C	0.74717	0.75285	A	0.24528	0.24715	0.372134
JHI-Hv50k-2016-17028	1H	28305345	T	0.9	0.9	G	0.1	0.1	0.18
JHI-Hv50k-2016-17026	1H	28305496	G	0.9	0.9	A	0.1	0.1	0.18
JHI-Hv50k-2016-17024	1H	28305791	A	0.9	0.9	G	0.1	0.1	0.18
JHI-Hv50k-2016-17023	1H	28305970	C	0.9	0.9	G	0.1	0.1	0.18
JHI-Hv50k-2016-17031	1H	28330793	C	0.9	0.9	T	0.1	0.1	0.18
JHI-Hv50k-2016-17036	1H	28473171	T	0.9	0.9	C	0.1	0.1	0.18
JHI-Hv50k-2016-17038	1H	28473213	A	0.9	0.9	G	0.1	0.1	0.18
JHI-Hv50k-2016-17043	1H	28550730	C	0.51509	0.52907	G	0.45849	0.47093	0.49831
JHI-Hv50k-2016-17066	1H	28628930	A	0.24528	0.52	G	0.22642	0.48	0.4992
JHI-Hv50k-2016-17082	1H	28657587	A	0.53774	0.54493	C	0.44906	0.45507	0.495963
JHI-Hv50k-2016-17085	1H	28658010	G	0.53774	0.54183	T	0.45472	0.45817	0.496501
JHI-Hv50k-2016-17086	1H	28658114	T	0.53396	0.54111	C	0.45283	0.45889	0.49662
JHI-Hv50k-2016-17142	1H	28954603	G	0.5566	0.55977	A	0.43774	0.44023	0.492855
JHI-Hv50k-2016-17159	1H	29031763	C	0.53585	0.53992	T	0.4566	0.46008	0.496813
JHI-Hv50k-2016-17163	1H	29033325	T	0.78491	0.79087	C	0.20755	0.20913	0.330789
JHI-Hv50k-2016-17164	1H	29033373	G	0.53585	0.5389	A	0.45849	0.4611	0.496974
JHI-Hv50k-2016-17165	1H	29033693	C	0.79057	0.79206	T	0.20755	0.20794	0.329402
JHI-Hv50k-2016-16945	1H	29083600	T	0.68113	0.68371	C	0.31509	0.31629	0.432501
JHI-Hv50k-2016-16946	1H	29084374	G	0.98113	0.98113	A	0.01887	0.01887	0.0370278
JHI-Hv50k-2016-17206	1H	29389117	C	0.51509	0.51901	T	0.47736	0.48099	0.499277
JHI-Hv50k-2016-17218	1H	29394440	C	0.51698	0.51992	T	0.47736	0.48008	0.499206
JHI-Hv50k-2016-17219	1H	29394536	G	0.53396	0.537	A	0.46038	0.463	0.497262
JHI-Hv50k-2016-17222	1H	29394802	G	0.79245	0.79395	A	0.20566	0.20605	0.327187
JHI-Hv50k-2016-17226	1H	29394869	G	0.79245	0.79395	A	0.20566	0.20605	0.327187
JHI-Hv50k-2016-17238	1H	29402487	G	0.50377	0.51248	C	0.47925	0.48752	0.499688
JHI-Hv50k-2016-17241	1H	29402981	T	0.67925	0.68182	C	0.31698	0.31818	0.433883
JHI-Hv50k-2016-17265	1H	29560263	C	0.65472	0.6572	T	0.34151	0.3428	0.450576
JHI-Hv50k-2016-17273	1H	29561334	G	0.65283	0.65283	A	0.34717	0.34717	0.453286
BOPA2_12_11498	1H	29561835	G	0.94717	0.94896	A	0.05094	0.05104	0.0968698
JHI-Hv50k-2016-17275	1H	29562046	C	0.78302	0.7845	G	0.21509	0.2155	0.33812
JHI-Hv50k-2016-17277	1H	29562136	C	0.78302	0.7845	T	0.21509	0.2155	0.33812
JHI-Hv50k-2016-17331	1H	29623503	C	0.94717	0.95256	A	0.04717	0.04744	0.0903789
JHI-Hv50k-2016-17346	1H	29668001	G	0.4283	0.88672	A	0.05472	0.11328	0.200895
JHI-Hv50k-2016-17362	1H	29671474	A	0.56415	0.56736	G	0.43019	0.43264	0.490925
JHI-Hv50k-2016-17364	1H	29671776	C	0.90566	0.9505	G	0.04717	0.0495	0.0940995
JHI-Hv50k-2016-17393	1H	29675455	A	0.60189	0.60417	C	0.39434	0.39583	0.478297
JHI-Hv50k-2016-17394	1H	29675671	T	0.56604	0.56926	C	0.4283	0.43074	0.490406
JHI-Hv50k-2016-17431	1H	29690842	G	0.86038	0.862	A	0.13774	0.138	0.237912
JHI-Hv50k-2016-17441	1H	29691119	C	0.58679	0.62325	T	0.35472	0.37675	0.469619
JHI-Hv50k-2016-17442	1H	29691182	T	0.78679	0.79278	A	0.20566	0.20722	0.32856
BOPA2_12_30336	1H	29731326	A	0.7283	0.73106	G	0.26792	0.26894	0.393223
JHI-Hv50k-2016-17481	1H	29731416	G	0.78302	0.78598	A	0.21321	0.21402	0.336431
SCRI_RS_114047	1H	29745896	A	0.73208	0.73485	G	0.26415	0.26515	0.389691
SCRI_RS_193392	1H	29746195	G	0.52453	0.52652	C	0.4717	0.47348	0.498593
JHI-Hv50k-2016-17526	1H	30067246	G	0.62264	0.62619	A	0.3717	0.37381	0.468152
JHI-Hv50k-2016-17545	1H	30221676	G	0.99434	0.99434	A	0.00566	0.00566	0.0112559
JHI-Hv50k-2016-17533	1H	30227233	A	0.68868	0.6979	G	0.29811	0.3021	0.421671
SCRI_RS_153785	1H	31443966	G	0.65094	0.65465	T	0.3434	0.34535	0.452167
JHI-Hv50k-2016-17683	1H	31444147	T	0.81132	0.81439	G	0.18491	0.18561	0.302318
SCRI_RS_170869	1H	31746907	G	0.70189	0.70722	A	0.29057	0.29278	0.41412
JHI-Hv50k-2016-17754	1H	31857293	C	0.88491	0.89163	G	0.10755	0.10837	0.193252
JHI-Hv50k-2016-17765	1H	31858698	C	0.7717	0.77609	A	0.22264	0.22391	0.347549
BOPA1_5381-1950	1H	31859874	A	0.66038	0.6654	G	0.33208	0.3346	0.445286
JHI-Hv50k-2016-17850	1H	33378458	C	0.66415	0.74894	A	0.22264	0.25106	0.376058
JHI-Hv50k-2016-17849	1H	33378919	A	0.66415	0.74735	G	0.22453	0.25265	0.377636
JHI-Hv50k-2016-17846	1H	33380216	T	0.66226	0.74681	C	0.22453	0.25319	0.37817
JHI-Hv50k-2016-17879	1H	33426638	A	0.70755	0.71293	C	0.28491	0.28707	0.409322
JHI-Hv50k-2016-17907	1H	33573843	C	0.76981	0.77863	T	0.21887	0.22137	0.344731
JHI-Hv50k-2016-17906	1H	33573937	T	0.70377	0.72147	C	0.2717	0.27853	0.401902
JHI-Hv50k-2016-17905	1H	33574076	G	0.77547	0.77989	C	0.21887	0.22011	0.343323
JHI-Hv50k-2016-17904	1H	33574086	C	0.50189	0.5057	G	0.49057	0.4943	0.499935
JHI-Hv50k-2016-17903	1H	33574358	T	0.49245	0.50289	C	0.48679	0.49711	0.499983
JHI-Hv50k-2016-17902	1H	33574603	A	0.71509	0.72745	G	0.26792	0.27255	0.396533
JHI-Hv50k-2016-17901	1H	33574698	C	0.51321	0.5181	T	0.47736	0.4819	0.499345
JHI-Hv50k-2016-17900	1H	33575012	G	0.71698	0.72519	A	0.2717	0.27481	0.398579
JHI-Hv50k-2016-17898	1H	33575521	C	0.52453	0.52952	T	0.46604	0.47048	0.498257
JHI-Hv50k-2016-17896	1H	33575712	A	0.72264	0.72676	G	0.2717	0.27324	0.39716
JHI-Hv50k-2016-17895	1H	33575942	C	0.51321	0.51711	T	0.47925	0.48289	0.499414
JHI-Hv50k-2016-17894	1H	33575950	C	0.72264	0.72814	T	0.26981	0.27186	0.395904
JHI-Hv50k-2016-17893	1H	33576220	A	0.72264	0.72676	C	0.2717	0.27324	0.39716
JHI-Hv50k-2016-17892	1H	33576780	A	0.77547	0.77989	G	0.21887	0.22011	0.343323
JHI-Hv50k-2016-17888	1H	33577716	T	0.71887	0.73269	C	0.26226	0.26731	0.391711
SCRI_RS_189483	1H	33578002	G	0.77547	0.78137	A	0.21698	0.21863	0.341662
JHI-Hv50k-2016-17885	1H	33578493	T	0.7717	0.77905	C	0.21887	0.22095	0.344262
JHI-Hv50k-2016-17884	1H	33579213	C	0.51321	0.51711	G	0.47925	0.48289	0.499414
JHI-Hv50k-2016-17883	1H	33579217	A	0.72264	0.72676	G	0.2717	0.27324	0.39716
SCRI_RS_230987	1H	33596268	A	0.60755	0.6087	C	0.39057	0.3913	0.476369
JHI-Hv50k-2016-17967	1H	33677382	C	0.51887	0.51985	G	0.47925	0.48015	0.499212
JHI-Hv50k-2016-17966	1H	33677657	G	0.6	0.60227	A	0.39623	0.39773	0.479082
JHI-Hv50k-2016-17965	1H	33678163	G	0.6	0.60227	A	0.39623	0.39773	0.479082
SCRI_RS_140837	1H	33678226	G	0.53019	0.53119	A	0.46792	0.46881	0.498054
JHI-Hv50k-2016-17926	1H	33779122	C	0.59245	0.5947	T	0.40377	0.4053	0.482064
JHI-Hv50k-2016-17996	1H	33901061	C	0.9566	0.95841	G	0.04151	0.04159	0.0797205
SCRI_RS_184784	1H	33902063	C	0.83396	0.83554	T	0.16415	0.16446	0.274826
JHI-Hv50k-2016-17993	1H	33902585	G	0.5434	0.54753	A	0.44906	0.45247	0.495482
SCRI_RS_11615	1H	34104533	C	0.76981	0.77273	T	0.22642	0.22727	0.351237
JHI-Hv50k-2016-18006	1H	34104691	T	0.7434	0.74621	C	0.25283	0.25379	0.378761
JHI-Hv50k-2016-18027	1H	34115367	T	0.54151	0.54563	C	0.45094	0.45437	0.495836
JHI-Hv50k-2016-18032	1H	34120523	G	0.74906	0.75189	A	0.24717	0.24811	0.373103
JHI-Hv50k-2016-18039	1H	34121689	T	0.90943	0.91461	G	0.08491	0.08539	0.156197
JHI-Hv50k-2016-18042	1H	34121955	C	0.76415	0.77143	T	0.22642	0.22857	0.352652
JHI-Hv50k-2016-18043	1H	34122081	T	0.74906	0.75189	C	0.24717	0.24811	0.373103
SCRI_RS_189637	1H	34122430	T	0.54151	0.54563	C	0.45094	0.45437	0.495836
SCRI_RS_160545	1H	34127209	G	0.67358	0.67614	A	0.32264	0.32386	0.437949
JHI-Hv50k-2016-18068	1H	34383093	A	0.53396	0.537	T	0.46038	0.463	0.497262
JHI-Hv50k-2016-18149	1H	34679473	T	0.70943	0.71347	C	0.28491	0.28653	0.408861
JHI-Hv50k-2016-18148	1H	34679746	T	0.93585	0.94118	C	0.05849	0.05882	0.11072
JHI-Hv50k-2016-18142	1H	34680669	T	0.6434	0.64583	G	0.35283	0.35417	0.457467
JHI-Hv50k-2016-18141	1H	34680672	T	0.63774	0.65	G	0.3434	0.35	0.455
JHI-Hv50k-2016-18139	1H	34680769	C	0.6434	0.64583	T	0.35283	0.35417	0.457467
JHI-Hv50k-2016-18138	1H	34680986	G	0.6434	0.64829	A	0.34906	0.35171	0.45602
JHI-Hv50k-2016-18134	1H	34681426	G	0.65283	0.6553	A	0.3434	0.3447	0.451764
SCRI_RS_147042	1H	34681438	T	0.6434	0.64583	C	0.35283	0.35417	0.457467
JHI-Hv50k-2016-18133	1H	34681438	A	0.64151	0.64516	G	0.35283	0.35484	0.457857
JHI-Hv50k-2016-18132	1H	34681552	G	0.71132	0.71402	A	0.28491	0.28598	0.408391
JHI-Hv50k-2016-18153	1H	34681970	G	0.94151	0.94151	C	0.05849	0.05849	0.110138
JHI-Hv50k-2016-18158	1H	34682269	T	0.63962	0.64449	G	0.35283	0.35551	0.458245
JHI-Hv50k-2016-18159	1H	34682329	G	0.7283	0.73524	A	0.26226	0.26476	0.389324
JHI-Hv50k-2016-18160	1H	34682710	T	0.77736	0.78178	C	0.21698	0.21822	0.3412
BOPA1_409-1643	1H	34685545	G	0.65472	0.6597	A	0.33774	0.3403	0.448992
JHI-Hv50k-2016-18180	1H	34747205	C	0.5434	0.55598	G	0.43396	0.44402	0.493732
SCRI_RS_187264	1H	34748254	A	0.72642	0.72917	T	0.26981	0.27083	0.394962
JHI-Hv50k-2016-18164	1H	34748692	G	0.74906	0.75619	C	0.24151	0.24381	0.368733
BOPA1_3277-446	1H	34748891	G	0.73585	0.73864	A	0.26038	0.26136	0.386102
JHI-Hv50k-2016-18163	1H	34748891	C	0.73208	0.73764	T	0.26038	0.26236	0.387054
JHI-Hv50k-2016-18189	1H	34787015	C	0.91698	0.91698	A	0.08302	0.08302	0.152255
JHI-Hv50k-2016-18188	1H	34788076	C	0.77358	0.78095	T	0.21698	0.21905	0.342134
JHI-Hv50k-2016-18214	1H	34941093	C	0.75094	0.75954	T	0.23774	0.24046	0.365278
SCRI_RS_183171	1H	34941903	T	0.73585	0.73864	C	0.26038	0.26136	0.386102
JHI-Hv50k-2016-18211	1H	34943096	G	0.77547	0.78137	A	0.21698	0.21863	0.341662
JHI-Hv50k-2016-18209	1H	34943311	T	0.53396	0.53396	A	0.46604	0.46604	0.497693
JHI-Hv50k-2016-18206	1H	34944443	A	0.54528	0.54839	T	0.44906	0.45161	0.495317
JHI-Hv50k-2016-18221	1H	35169512	A	0.37358	0.88789	C	0.04717	0.11211	0.199083
JHI-Hv50k-2016-18243	1H	35282363	T	0.75283	0.76	C	0.23774	0.24	0.3648
BOPA1_6382-396	1H	35284213	A	0.76415	0.7656	G	0.23396	0.2344	0.358913
JHI-Hv50k-2016-18239	1H	35284699	A	0.51887	0.51985	G	0.47925	0.48015	0.499212
SCRI_RS_141140	1H	35728402	G	0.75472	0.76046	T	0.23774	0.23954	0.364321
JHI-Hv50k-2016-18338	1H	36142272	C	0.75849	0.76281	T	0.23585	0.23719	0.361862
JHI-Hv50k-2016-18354	1H	36149639	G	0.53585	0.5389	C	0.45849	0.4611	0.496974
JHI-Hv50k-2016-18360	1H	36152144	A	0.5434	0.5434	G	0.4566	0.4566	0.496233
JHI-Hv50k-2016-18373	1H	36337704	T	0.51887	0.51985	C	0.47925	0.48015	0.499212
JHI-Hv50k-2016-18380	1H	36369937	A	0.75472	0.76046	G	0.23774	0.23954	0.364321
JHI-Hv50k-2016-18381	1H	36370084	G	0.54151	0.54356	A	0.45472	0.45644	0.496205
JHI-Hv50k-2016-18382	1H	36370328	G	0.52075	0.52471	C	0.4717	0.47529	0.498779
JHI-Hv50k-2016-18385	1H	36416668	C	0.75849	0.76281	A	0.23585	0.23719	0.361862
JHI-Hv50k-2016-18386	1H	36416952	A	0.51887	0.51887	G	0.48113	0.48113	0.499288
JHI-Hv50k-2016-18400	1H	36427060	G	0.63774	0.64015	A	0.35849	0.35985	0.460716
JHI-Hv50k-2016-18401	1H	36427379	A	0.67736	0.67992	G	0.31887	0.32008	0.435258
BOPA1_2314-1412	1H	36687040	G	0.52075	0.52174	A	0.47736	0.47826	0.499055
BOPA1_6720-641	1H	36735204	G	0.93019	0.93371	A	0.06604	0.06629	0.123791
JHI-Hv50k-2016-18413	1H	36735303	G	0.93019	0.93371	T	0.06604	0.06629	0.123791
JHI-Hv50k-2016-18411	1H	36735792	T	0.51509	0.51705	A	0.48113	0.48295	0.499419
JHI-Hv50k-2016-18410	1H	36735910	C	0.93585	0.93939	T	0.06038	0.06061	0.113873
JHI-Hv50k-2016-18468	1H	37012470	G	0.93208	0.93384	C	0.06604	0.06616	0.123566
JHI-Hv50k-2016-18467	1H	37012590	C	0.55094	0.55303	G	0.44528	0.44697	0.494376
JHI-Hv50k-2016-18465	1H	37013704	G	0.90943	0.91461	A	0.08491	0.08539	0.156197
JHI-Hv50k-2016-18464	1H	37014013	C	0.7	0.70532	A	0.29245	0.29468	0.415687
JHI-Hv50k-2016-18462	1H	37014405	A	0.53774	0.54183	T	0.45472	0.45817	0.496501
JHI-Hv50k-2016-18456	1H	37017181	G	0.90943	0.91461	C	0.08491	0.08539	0.156197
SCRI_RS_199178	1H	37017192	C	0.65472	0.6572	T	0.34151	0.3428	0.450576
JHI-Hv50k-2016-18451	1H	37017533	A	0.70189	0.70588	G	0.29245	0.29412	0.415227
JHI-Hv50k-2016-18450	1H	37017627	C	0.93208	0.93384	T	0.06604	0.06616	0.123566
JHI-Hv50k-2016-18448	1H	37017826	C	0.90943	0.91288	A	0.08679	0.08712	0.15906
JHI-Hv50k-2016-18443	1H	37018193	C	0.55094	0.55303	G	0.44528	0.44697	0.494376
SCRI_RS_199179	1H	37018883	G	0.66415	0.93122	T	0.04906	0.06878	0.128099
SCRI_RS_9480	1H	37020282	T	0.95094	0.95274	C	0.04717	0.04726	0.090053
JHI-Hv50k-2016-18514	1H	37626461	G	0.91887	0.92235	C	0.07736	0.07765	0.143241
SCRI_RS_132461	1H	37627211	G	0.88868	0.89374	A	0.10566	0.10626	0.189938
BOPA2_12_30268	1H	37941423	A	0.93208	0.93561	G	0.06415	0.06439	0.120488
JHI-Hv50k-2016-18530	1H	38729694	G	0.52075	0.52571	A	0.46981	0.47429	0.498678
JHI-Hv50k-2016-18529	1H	38731020	A	0.86415	0.86578	C	0.13396	0.13422	0.23241
JHI-Hv50k-2016-18534	1H	38810700	C	0.76226	0.7666	T	0.23208	0.2334	0.357849
JHI-Hv50k-2016-18542	1H	38812794	T	0.76226	0.76515	C	0.23396	0.23485	0.359391
JHI-Hv50k-2016-18575	1H	38972670	T	0.76226	0.76806	G	0.23019	0.23194	0.356288
JHI-Hv50k-2016-18603	1H	38980824	C	0.76226	0.76806	G	0.23019	0.23194	0.356288
JHI-Hv50k-2016-18606	1H	38980994	A	0.76038	0.78101	G	0.21321	0.21899	0.342067
JHI-Hv50k-2016-18607	1H	38981204	T	0.76226	0.77099	C	0.22642	0.22901	0.353129
JHI-Hv50k-2016-18608	1H	38981352	A	0.51887	0.52182	T	0.47547	0.47818	0.499048
JHI-Hv50k-2016-18612	1H	38982121	A	0.68302	0.68821	G	0.30943	0.31179	0.429154
JHI-Hv50k-2016-18614	1H	38982312	T	0.75849	0.76426	C	0.23396	0.23574	0.360333
JHI-Hv50k-2016-18626	1H	38983674	T	0.76226	0.76806	G	0.23019	0.23194	0.356288
JHI-Hv50k-2016-18628	1H	38983814	G	0.76226	0.76515	T	0.23396	0.23485	0.359391
SCRI_RS_214559	1H	39417646	A	0.53396	0.54008	G	0.45472	0.45992	0.496787
JHI-Hv50k-2016-18682	1H	39417751	C	0.53585	0.5389	G	0.45849	0.4611	0.496974
JHI-Hv50k-2016-18613	1H	41442533	C	0.72642	0.75639	T	0.23396	0.24361	0.368528
JHI-Hv50k-2016-18696	1H	41844917	G	0.96792	0.96975	A	0.03019	0.03025	0.0586699
JHI-Hv50k-2016-18697	1H	42106597	G	0.96792	0.96975	T	0.03019	0.03025	0.0586699
BOPA2_12_10314	1H	43706821	C	0.82642	0.82955	A	0.16981	0.17045	0.282794
JHI-Hv50k-2016-18699	1H	45472084	C	0.61321	0.61553	T	0.38302	0.38447	0.473306
BOPA2_12_20641	1H	49443170	A	0.93774	0.94129	C	0.05849	0.05871	0.110526
BOPA1_ABC12199-1-1-25	1H	53355395	A	0.93774	0.94129	G	0.05849	0.05871	0.110526
JHI-Hv50k-2016-18712	1H	53668009	A	0.6283	0.6355	C	0.36038	0.3645	0.46328
JHI-Hv50k-2016-18720	1H	53859158	C	0.5717	0.57495	T	0.42264	0.42505	0.488765
JHI-Hv50k-2016-18721	1H	53859525	C	0.5717	0.57495	T	0.42264	0.42505	0.488765
JHI-Hv50k-2016-18725	1H	53860200	C	0.5717	0.57495	T	0.42264	0.42505	0.488765
JHI-Hv50k-2016-18726	1H	53860443	T	0.56981	0.57414	C	0.42264	0.42586	0.489007
JHI-Hv50k-2016-18729	1H	53860689	T	0.56792	0.57333	C	0.42264	0.42667	0.489245
BOPA2_12_10491	1H	53860743	A	0.5717	0.57495	G	0.42264	0.42505	0.488765
JHI-Hv50k-2016-18735	1H	53861290	T	0.5717	0.57935	G	0.41509	0.42065	0.487407
JHI-Hv50k-2016-18745	1H	53862767	C	0.80943	0.81559	T	0.18302	0.18441	0.300806
JHI-Hv50k-2016-18747	1H	53863746	A	0.5283	0.53333	G	0.46226	0.46667	0.497778
JHI-Hv50k-2016-18780	1H	53989489	G	0.5717	0.57495	C	0.42264	0.42505	0.488765
JHI-Hv50k-2016-18779	1H	53989572	T	0.53585	0.54198	C	0.45283	0.45802	0.496475
JHI-Hv50k-2016-18762	1H	54045045	G	0.49434	0.50096	A	0.49245	0.49904	0.499998
JHI-Hv50k-2016-18760	1H	54045148	G	0.50943	0.51923	C	0.4717	0.48077	0.49926
JHI-Hv50k-2016-18797	1H	54477984	C	0.57736	0.58175	T	0.41509	0.41825	0.486634
JHI-Hv50k-2016-18793	1H	54479220	G	0.53396	0.54008	A	0.45472	0.45992	0.496787
JHI-Hv50k-2016-18883	1H	54697516	G	0.53585	0.54198	C	0.45283	0.45802	0.496475
JHI-Hv50k-2016-18868	1H	54732042	C	0.78113	0.78409	T	0.21509	0.21591	0.338586
JHI-Hv50k-2016-18861	1H	54732328	A	0.28113	0.61826	G	0.17358	0.38174	0.472029
JHI-Hv50k-2016-18833	1H	54744156	C	0.64906	0.65399	G	0.3434	0.34601	0.452574
JHI-Hv50k-2016-18889	1H	55091376	C	0.65283	0.6553	T	0.3434	0.3447	0.451764
JHI-Hv50k-2016-18940	1H	55157041	C	0.67358	0.67742	T	0.32075	0.32258	0.437044
JHI-Hv50k-2016-18950	1H	55162145	T	0.61887	0.6495	C	0.33396	0.3505	0.4553
JHI-Hv50k-2016-19014	1H	55564074	T	0.63208	0.64176	C	0.35283	0.35824	0.459808
BOPA1_2407-1771	1H	55565030	G	0.73585	0.7457	A	0.25094	0.2543	0.379263
JHI-Hv50k-2016-19015	1H	55565030	C	0.73585	0.7457	T	0.25094	0.2543	0.379263
BOPA1_2265-363	1H	56843771	G	0.67358	0.68	A	0.31698	0.32	0.4352
JHI-Hv50k-2016-19145	1H	56843771	C	0.67358	0.68	T	0.31698	0.32	0.4352
JHI-Hv50k-2016-19160	1H	56859785	A	0.55472	0.56214	G	0.43208	0.43786	0.492277
JHI-Hv50k-2016-19169	1H	56862923	A	0.52453	0.53155	T	0.46226	0.46845	0.498009
JHI-Hv50k-2016-19171	1H	56864494	G	0.92642	0.982	A	0.01698	0.018	0.035352
JHI-Hv50k-2016-398120	1H	56868027	A	0.69245	0.70038	G	0.29623	0.29962	0.419696
JHI-Hv50k-2016-19198	1H	56911048	A	0.55283	0.56023	G	0.43396	0.43977	0.492745
JHI-Hv50k-2016-19217	1H	57565919	T	0.67547	0.68582	C	0.30943	0.31418	0.430942
JHI-Hv50k-2016-19255	1H	58797257	A	0.52264	0.52964	T	0.46415	0.47036	0.498243
JHI-Hv50k-2016-19261	1H	59406586	A	0.55849	0.56597	G	0.4283	0.43403	0.491296
JHI-Hv50k-2016-19267	1H	59577895	G	0.63774	0.64627	A	0.34906	0.35373	0.45721
BOPA1_3710-852	1H	59577896	G	0.63962	0.64449	A	0.35283	0.35551	0.458245
JHI-Hv50k-2016-19285	1H	60974435	G	0.91321	0.91841	A	0.08113	0.08159	0.149866
JHI-Hv50k-2016-19311	1H	61847786	T	0.54717	0.55449	C	0.43962	0.44551	0.494062
BOPA2_12_31467	1H	62314300	G	0.55094	0.55619	A	0.43962	0.44381	0.493685
JHI-Hv50k-2016-19334	1H	62610664	T	0.66792	0.67429	C	0.32264	0.32571	0.439246
SCRI_RS_151764	1H	62620056	T	0.52642	0.53244	C	0.46226	0.46756	0.497895
JHI-Hv50k-2016-19345	1H	62621914	T	0.5	0.50766	A	0.48491	0.49234	0.499883
JHI-Hv50k-2016-19396	1H	63069149	T	0.59434	0.60229	C	0.39245	0.39771	0.479074
JHI-Hv50k-2016-19406	1H	63681909	T	0.54717	0.5482	A	0.45094	0.4518	0.495354
JHI-Hv50k-2016-19484	1H	64832088	C	0.52264	0.53065	T	0.46226	0.46935	0.498121
JHI-Hv50k-2016-19489	1H	64834912	A	0.52075	0.52975	C	0.46226	0.47025	0.49823
JHI-Hv50k-2016-19505	1H	64978434	T	0.52453	0.53155	G	0.46226	0.46845	0.498009
BOPA2_12_30683	1H	65184980	A	0.52075	0.52874	G	0.46415	0.47126	0.498348
JHI-Hv50k-2016-19512	1H	65193364	A	0.60566	0.61143	G	0.38491	0.38857	0.475167
JHI-Hv50k-2016-19518	1H	65196250	G	0.60566	0.61377	C	0.38113	0.38623	0.474113
JHI-Hv50k-2016-19531	1H	65399490	T	0.51887	0.52682	C	0.46604	0.47318	0.498561
JHI-Hv50k-2016-19521	1H	65414088	G	0.62453	0.63654	A	0.3566	0.36346	0.462714
JHI-Hv50k-2016-19660	1H	67718888	G	0.6717	0.6781	A	0.31887	0.3219	0.436561
JHI-Hv50k-2016-19669	1H	67777270	G	0.67358	0.67871	C	0.31887	0.32129	0.436125
JHI-Hv50k-2016-19675	1H	67921394	G	0.63962	0.64695	A	0.34906	0.35305	0.456811
JHI-Hv50k-2016-19699	1H	68103271	A	0.51887	0.52581	G	0.46792	0.47419	0.498668
JHI-Hv50k-2016-19718	1H	68401596	A	0.52642	0.53448	G	0.45849	0.46552	0.497622
JHI-Hv50k-2016-19711	1H	68472477	G	0.51698	0.5229	A	0.4717	0.4771	0.498951
JHI-Hv50k-2016-19725	1H	68512188	G	0.56038	0.5625	C	0.43585	0.4375	0.492188
JHI-Hv50k-2016-19743	1H	68907744	C	0.59811	0.60728	T	0.38679	0.39272	0.476982
JHI-Hv50k-2016-19752	1H	69178332	C	0.98868	0.98868	A	0.01132	0.01132	0.0223837
JHI-Hv50k-2016-19803	1H	69427262	T	0.43585	0.93145	A	0.03208	0.06855	0.127702
JHI-Hv50k-2016-19826	1H	69633776	T	0.83774	0.92308	C	0.06981	0.07692	0.142007
JHI-Hv50k-2016-19899	1H	69774159	C	0.96604	0.96786	T	0.03208	0.03214	0.062214
JHI-Hv50k-2016-19887	1H	69774711	A	0.96604	0.96786	G	0.03208	0.03214	0.062214
JHI-Hv50k-2016-19864	1H	69787769	A	0.3	0.63347	G	0.17358	0.36653	0.464372
JHI-Hv50k-2016-19938	1H	70133335	G	0.54528	0.54943	C	0.44717	0.45057	0.495113
SCRI_RS_188937	1H	70223421	C	0.78679	0.78977	T	0.20943	0.21023	0.332067
JHI-Hv50k-2016-19943	1H	70224800	T	0.67736	0.68251	C	0.31509	0.31749	0.43338
SCRI_RS_182631	1H	70225172	A	0.79623	0.79924	G	0.2	0.20076	0.320911
JHI-Hv50k-2016-19959	1H	70230586	G	0.70943	0.71483	A	0.28302	0.28517	0.407696
JHI-Hv50k-2016-19966	1H	70234924	T	0.71132	0.74067	G	0.24906	0.25933	0.384156
BOPA1_8166-525	1H	72212187	A	0.80377	0.80682	G	0.19245	0.19318	0.311723
BOPA2_12_11301	1H	73040617	A	0.88302	0.88636	G	0.11321	0.11364	0.201452
SCRI_RS_160916	1H	73677203	A	0.80377	0.80682	G	0.19245	0.19318	0.311723
BOPA1_5019-879	1H	78310629	A	0.74906	0.77237	G	0.22075	0.22763	0.351629
JHI-Hv50k-2016-20099	1H	78914957	C	0.96038	0.96219	T	0.03774	0.03781	0.0727608
BOPA2_12_10235	1H	79022114	C	0.80377	0.80682	A	0.19245	0.19318	0.311723
JHI-Hv50k-2016-20069	1H	79024087	G	0.73019	0.74138	A	0.25472	0.25862	0.383471
JHI-Hv50k-2016-20076	1H	79050568	T	0.73019	0.73574	C	0.26226	0.26426	0.388853
SCRI_RS_85918	1H	79050682	A	0.73019	0.73574	G	0.26226	0.26426	0.388853
SCRI_RS_85917	1H	79051285	G	0.73019	0.73714	A	0.26038	0.26286	0.387529
JHI-Hv50k-2016-20261	1H	79591623	A	0.96038	0.96219	G	0.03774	0.03781	0.0727608
JHI-Hv50k-2016-20270	1H	79917704	A	0.93396	0.9375	T	0.06226	0.0625	0.117188
JHI-Hv50k-2016-20344	1H	80682161	C	0.51321	0.51515	G	0.48302	0.48485	0.499541
JHI-Hv50k-2016-20318	1H	80691516	T	0.9283	0.93182	C	0.06792	0.06818	0.127063
JHI-Hv50k-2016-20303	1H	80698574	A	0.9283	0.93359	G	0.06604	0.06641	0.123999
JHI-Hv50k-2016-20368	1H	81058426	T	0.96226	0.96408	G	0.03585	0.03592	0.0692595
JHI-Hv50k-2016-20391	1H	81845554	T	0.79057	0.79962	C	0.19811	0.20038	0.320456
JHI-Hv50k-2016-20404	1H	82056426	C	0.96792	0.96975	G	0.03019	0.03025	0.0586699
JHI-Hv50k-2016-20414	1H	82503515	C	0.79245	0.79848	T	0.2	0.20152	0.321819
JHI-Hv50k-2016-20419	1H	82569066	C	0.78679	0.79278	T	0.20566	0.20722	0.32856
JHI-Hv50k-2016-20431	1H	82573344	C	0.89057	0.89905	A	0.1	0.10095	0.181518
JHI-Hv50k-2016-20460	1H	83348053	G	0.96792	0.96975	A	0.03019	0.03025	0.0586699
BOPA1_ConsensusGBS0342-1	1H	83348076	A	0.78679	0.79429	G	0.20377	0.20571	0.326787
JHI-Hv50k-2016-20454	1H	83349224	A	0.96226	0.96408	G	0.03585	0.03592	0.0692595
SCRI_RS_82327	1H	83552592	A	0.79434	0.79886	C	0.2	0.20114	0.321365
JHI-Hv50k-2016-20488	1H	83561704	T	0.8	0.80455	C	0.19434	0.19545	0.314499
JHI-Hv50k-2016-20498	1H	83758402	A	0.79811	0.80418	G	0.19434	0.19582	0.314949
JHI-Hv50k-2016-20512	1H	83993038	T	0.8	0.80608	C	0.19245	0.19392	0.31263
JHI-Hv50k-2016-20517	1H	84192232	A	0.50566	0.50662	T	0.49245	0.49338	0.499912
BOPA2_12_30796	1H	84338615	A	0.79811	0.80114	G	0.19811	0.19886	0.318629
JHI-Hv50k-2016-20532	1H	84419093	A	0.96038	0.96952	G	0.03019	0.03048	0.0591019
JHI-Hv50k-2016-20549	1H	85373873	C	0.79434	0.80038	T	0.19811	0.19962	0.319544
JHI-Hv50k-2016-20551	1H	85386859	C	0.8	0.80455	T	0.19434	0.19545	0.314499
JHI-Hv50k-2016-20569	1H	85942094	G	0.96604	0.9697	A	0.03019	0.0303	0.0587638
JHI-Hv50k-2016-20585	1H	86726221	C	0.79434	0.79886	A	0.2	0.20114	0.321365
BOPA1_3444-1044	1H	86744107	A	0.79245	0.79848	G	0.2	0.20152	0.321819
JHI-Hv50k-2016-20590	1H	86744107	A	0.78868	0.79771	G	0.2	0.20229	0.322738
JHI-Hv50k-2016-20614	1H	87260991	T	0.80566	0.80718	G	0.19245	0.19282	0.311281
JHI-Hv50k-2016-20629	1H	87272569	C	0.96415	0.96964	T	0.03019	0.03036	0.0588765
JHI-Hv50k-2016-20636	1H	87793116	C	0.79434	0.80038	G	0.19811	0.19962	0.319544
SCRI_RS_17924	1H	88564567	G	0.79434	0.8019	T	0.19623	0.1981	0.317713
JHI-Hv50k-2016-20692	1H	89212673	C	0.79245	0.8	T	0.19811	0.2	0.32
JHI-Hv50k-2016-20687	1H	89237364	G	0.38868	0.9717	A	0.01132	0.0283	0.0549982
JHI-Hv50k-2016-20684	1H	89241270	A	0.79811	0.80418	G	0.19434	0.19582	0.314949
JHI-Hv50k-2016-20725	1H	90356366	G	0.79245	0.79696	C	0.20189	0.20304	0.32363
SCRI_RS_139785	1H	92553333	C	0.6566	0.6616	T	0.33585	0.3384	0.447771
BOPA2_12_10159	1H	92556729	A	0.82453	0.82765	C	0.1717	0.17235	0.285291
JHI-Hv50k-2016-20746	1H	94186768	G	0.68491	0.69011	A	0.30755	0.30989	0.427716
BOPA2_12_30438	1H	98026235	G	0.82453	0.82765	A	0.1717	0.17235	0.285291
JHI-Hv50k-2016-20757	1H	99126110	C	0.9566	0.96388	T	0.03585	0.03612	0.0696307
JHI-Hv50k-2016-18574	1H	99907066	C	0.76038	0.76616	T	0.23208	0.23384	0.358318
JHI-Hv50k-2016-20766	1H	100672980	C	0.50189	0.50284	T	0.49623	0.49716	0.499984
JHI-Hv50k-2016-20767	1H	101900430	G	0.5	0.50285	A	0.49434	0.49715	0.499984
BOPA2_12_30436	1H	102549697	C	0.89434	0.89603	A	0.10377	0.10397	0.18632
JHI-Hv50k-2016-20769	1H	104484810	G	0.96038	0.96402	A	0.03585	0.03598	0.0693709
JHI-Hv50k-2016-20770	1H	105198600	T	0.68491	0.69011	G	0.30755	0.30989	0.427716
BOPA1_ABC07133-1-1-56	1H	108053057	A	0.99623	0.99623	G	0.00377	0.00377	0.00751157
JHI-Hv50k-2016-20773	1H	108054720	G	0.9434	0.94518	A	0.05472	0.05482	0.10363
BOPA1_8613-278	1H	110245253	C	0.68679	0.6907	A	0.30755	0.3093	0.427267
JHI-Hv50k-2016-20776	1H	110245253	C	0.68302	0.68952	A	0.30755	0.31048	0.428164
JHI-Hv50k-2016-20781	1H	111955942	G	0.50189	0.50284	A	0.49623	0.49716	0.499984
JHI-Hv50k-2016-20787	1H	115060484	A	0.94717	0.95985	C	0.03962	0.04015	0.077076
JHI-Hv50k-2016-20789	1H	118727449	G	0.5	0.50285	A	0.49434	0.49715	0.499984
JHI-Hv50k-2016-20796	1H	120942845	T	0.49623	0.50191	G	0.49245	0.49809	0.499993
BOPA2_12_30762	1H	123228569	G	0.89434	0.89603	A	0.10377	0.10397	0.18632
JHI-Hv50k-2016-20804	1H	126687599	C	0.5	0.5038	T	0.49245	0.4962	0.499971
JHI-Hv50k-2016-20816	1H	131617032	G	0.9283	0.93359	C	0.06604	0.06641	0.123999
JHI-Hv50k-2016-20819	1H	131920498	A	0.96038	0.96402	G	0.03585	0.03598	0.0693709
JHI-Hv50k-2016-20825	1H	135209112	G	0.5	0.50189	A	0.49623	0.49811	0.499993
JHI-Hv50k-2016-20828	1H	136201711	G	0.68491	0.69011	A	0.30755	0.30989	0.427716
JHI-Hv50k-2016-20838	1H	146597510	A	0.93208	0.93384	G	0.06604	0.06616	0.123566
JHI-Hv50k-2016-20842	1H	150507697	A	0.51509	0.51705	T	0.48113	0.48295	0.499419
JHI-Hv50k-2016-20851	1H	157045729	G	0.96038	0.96402	T	0.03585	0.03598	0.0693709
JHI-Hv50k-2016-20853	1H	157779446	A	0.68491	0.69011	G	0.30755	0.30989	0.427716
JHI-Hv50k-2016-20858	1H	160737225	G	0.81698	0.89095	A	0.1	0.10905	0.194316
JHI-Hv50k-2016-20888	1H	170015172	C	0.65472	0.68307	A	0.30377	0.31693	0.432971
JHI-Hv50k-2016-20896	1H	173392537	G	0.50189	0.50474	A	0.49245	0.49526	0.499955
BOPA2_12_30498	1H	174825728	G	0.99623	0.99623	A	0.00377	0.00377	0.00751157
JHI-Hv50k-2016-20908	1H	176531009	C	0.5	0.50189	T	0.49623	0.49811	0.499993
JHI-Hv50k-2016-20928	1H	184635167	G	0.89623	0.89792	T	0.10189	0.10208	0.183319
JHI-Hv50k-2016-20930	1H	185000507	G	0.9566	0.95841	A	0.04151	0.04159	0.0797205
JHI-Hv50k-2016-20934	1H	186451058	C	0.9566	0.95841	T	0.04151	0.04159	0.0797205
JHI-Hv50k-2016-20959	1H	195020010	G	0.47547	0.98824	A	0.00566	0.01176	0.0232434
JHI-Hv50k-2016-20967	1H	200857131	G	0.6283	0.63068	A	0.36792	0.36932	0.465845
JHI-Hv50k-2016-20976	1H	208102100	G	0.96038	0.96402	T	0.03585	0.03598	0.0693709
JHI-Hv50k-2016-20985	1H	214112973	G	0.47547	0.98824	T	0.00566	0.01176	0.0232434
JHI-Hv50k-2016-20994	1H	217849414	A	0.46038	0.96443	T	0.01698	0.03557	0.0686096
JHI-Hv50k-2016-21018	1H	227252858	C	0.50377	0.50473	T	0.49434	0.49527	0.499955
BOPA2_12_10506	1H	228030652	A	0.89623	0.89792	G	0.10189	0.10208	0.183319
JHI-Hv50k-2016-21022	1H	230139006	G	0.53019	0.53422	A	0.46226	0.46578	0.497658
JHI-Hv50k-2016-21026	1H	232871056	C	0.66604	0.66983	T	0.3283	0.33017	0.442316
JHI-Hv50k-2016-21036	1H	238851960	C	0.51321	0.51515	A	0.48302	0.48485	0.499541
JHI-Hv50k-2016-21042	1H	240982740	G	0.51509	0.51607	A	0.48302	0.48393	0.499484
JHI-Hv50k-2016-21053	1H	247601110	C	0.93208	0.93384	G	0.06604	0.06616	0.123566
BOPA1_ABC14148-1-1-177	1H	248994856	A	0.98113	0.98299	G	0.01698	0.01701	0.0334413
JHI-Hv50k-2016-21063	1H	251350776	G	0.96038	0.96402	A	0.03585	0.03598	0.0693709
JHI-Hv50k-2016-21067	1H	252344004	G	0.9566	0.96023	A	0.03962	0.03977	0.0763767
JHI-Hv50k-2016-21076	1H	255603658	C	0.68491	0.69011	T	0.30755	0.30989	0.427716
JHI-Hv50k-2016-21079	1H	256405670	C	0.6	0.60342	T	0.39434	0.39658	0.478609
JHI-Hv50k-2016-21080	1H	256407852	T	0.62642	0.62998	C	0.36792	0.37002	0.46621
JHI-Hv50k-2016-21081	1H	256410175	A	0.6	0.60227	G	0.39623	0.39773	0.479082
JHI-Hv50k-2016-21086	1H	256727581	T	0.28491	0.59216	C	0.19623	0.40784	0.483013
JHI-Hv50k-2016-21094	1H	257313565	C	0.52075	0.52273	T	0.47547	0.47727	0.498967
JHI-Hv50k-2016-21104	1H	257923924	C	0.6	0.60342	G	0.39434	0.39658	0.478609
JHI-Hv50k-2016-21127	1H	258821553	G	0.60377	0.60721	A	0.39057	0.39279	0.477012
JHI-Hv50k-2016-21131	1H	258936689	C	0.62642	0.62879	T	0.36981	0.37121	0.466826
JHI-Hv50k-2016-21136	1H	259328440	T	0.62642	0.62879	C	0.36981	0.37121	0.466826
BOPA1_4511-1878	1H	259329483	A	0.89434	0.89603	T	0.10377	0.10397	0.18632
JHI-Hv50k-2016-21166	1H	259568791	T	0.50755	0.51238	C	0.48302	0.48762	0.499693
JHI-Hv50k-2016-21173	1H	259791288	G	0.96604	0.96604	A	0.03396	0.03396	0.0656134
JHI-Hv50k-2016-21235	1H	261275792	C	0.51698	0.51698	G	0.48302	0.48302	0.499423
JHI-Hv50k-2016-21248	1H	261434597	A	0.96604	0.96604	G	0.03396	0.03396	0.0656134
JHI-Hv50k-2016-21238	1H	261440364	C	0.91132	0.91825	A	0.08113	0.08175	0.150134
JHI-Hv50k-2016-21289	1H	261672822	C	0.96604	0.96604	T	0.03396	0.03396	0.0656134
JHI-Hv50k-2016-21380	1H	262299433	A	0.5434	0.54857	T	0.44717	0.45143	0.495282
JHI-Hv50k-2016-21397	1H	262856281	T	0.96038	0.96584	C	0.03396	0.03416	0.0659862
JHI-Hv50k-2016-21391	1H	262882643	C	0.52642	0.53042	A	0.46604	0.46958	0.498149
JHI-Hv50k-2016-21386	1H	262887147	T	0.96415	0.96597	C	0.03396	0.03403	0.0657439
JHI-Hv50k-2016-21445	1H	263618996	T	0.53962	0.5458	G	0.44906	0.4542	0.495805
JHI-Hv50k-2016-21464	1H	264057009	C	0.96604	0.96604	G	0.03396	0.03396	0.0656134
JHI-Hv50k-2016-21472	1H	264061950	G	0.53962	0.54476	A	0.45094	0.45524	0.495993
JHI-Hv50k-2016-21478	1H	264308247	T	0.96604	0.96604	G	0.03396	0.03396	0.0656134
JHI-Hv50k-2016-21519	1H	265252225	C	0.9283	0.9283	A	0.0717	0.0717	0.133118
JHI-Hv50k-2016-21571	1H	265889366	G	0.92075	0.92776	A	0.0717	0.07224	0.134043
JHI-Hv50k-2016-21574	1H	265891024	T	0.9283	0.9283	C	0.0717	0.0717	0.133118
JHI-Hv50k-2016-21579	1H	266090097	G	0.92642	0.92817	T	0.0717	0.07183	0.133341
JHI-Hv50k-2016-21592	1H	266665138	G	0.52642	0.53244	C	0.46226	0.46756	0.497895
JHI-Hv50k-2016-21604	1H	266904930	A	0.9283	0.9283	G	0.0717	0.0717	0.133118
JHI-Hv50k-2016-21611	1H	266908585	T	0.53019	0.53422	A	0.46226	0.46578	0.497658
JHI-Hv50k-2016-21677	1H	268198915	A	0.49623	0.50095	G	0.49434	0.49905	0.499998
JHI-Hv50k-2016-21679	1H	268201940	A	0.5	0.50573	G	0.48868	0.49427	0.499934
JHI-Hv50k-2016-21727	1H	269158160	G	0.5717	0.57714	T	0.41887	0.42286	0.488099
JHI-Hv50k-2016-21742	1H	269653631	C	0.5	0.50476	T	0.49057	0.49524	0.499955
JHI-Hv50k-2016-21751	1H	269751261	T	0.5	0.5038	C	0.49245	0.4962	0.499971
JHI-Hv50k-2016-21784	1H	270367860	C	0.43774	0.91339	T	0.04151	0.08661	0.158217
JHI-Hv50k-2016-21844	1H	270922024	G	0.5717	0.57714	A	0.41887	0.42286	0.488099
JHI-Hv50k-2016-21846	1H	271080474	T	0.5	0.50476	C	0.49057	0.49524	0.499955
JHI-Hv50k-2016-21879	1H	271810179	C	0.9283	0.9283	G	0.0717	0.0717	0.133118
JHI-Hv50k-2016-21897	1H	272376143	G	0.9283	0.9283	A	0.0717	0.0717	0.133118
JHI-Hv50k-2016-21903	1H	272762926	G	0.5566	0.5619	A	0.43396	0.4381	0.492337
JHI-Hv50k-2016-21932	1H	273711256	A	0.55849	0.56274	G	0.43396	0.43726	0.492127
JHI-Hv50k-2016-21954	1H	274261042	C	0.93019	0.93019	T	0.06981	0.06981	0.129873
JHI-Hv50k-2016-21966	1H	274334632	T	0.53019	0.53019	A	0.46981	0.46981	0.498177
JHI-Hv50k-2016-22016	1H	275037988	C	0.93019	0.93195	T	0.06792	0.06805	0.126838
JHI-Hv50k-2016-22038	1H	275363861	G	0.93019	0.93019	A	0.06981	0.06981	0.129873
JHI-Hv50k-2016-22058	1H	275485580	A	0.50189	0.50474	G	0.49245	0.49526	0.499955
JHI-Hv50k-2016-22069	1H	275954438	A	0.5	0.50573	G	0.48868	0.49427	0.499934
JHI-Hv50k-2016-22091	1H	276390168	C	0.53962	0.54476	G	0.45094	0.45524	0.495993
JHI-Hv50k-2016-22123	1H	277782518	C	0.93019	0.93019	G	0.06981	0.06981	0.129873
JHI-Hv50k-2016-22138	1H	278365276	G	0.5	0.50573	A	0.48868	0.49427	0.499934
JHI-Hv50k-2016-22145	1H	278666625	G	0.55283	0.56023	A	0.43396	0.43977	0.492745
JHI-Hv50k-2016-22200	1H	280328832	A	0.55849	0.56381	G	0.43208	0.43619	0.491857
JHI-Hv50k-2016-22255	1H	280712482	C	0.93019	0.93019	A	0.06981	0.06981	0.129873
JHI-Hv50k-2016-22269	1H	281046018	G	0.25472	0.5336	T	0.22264	0.4664	0.497742
JHI-Hv50k-2016-22293	1H	281694414	C	0.5	0.5038	T	0.49245	0.4962	0.499971
JHI-Hv50k-2016-22309	1H	281709265	G	0.53774	0.54183	C	0.45472	0.45817	0.496501
JHI-Hv50k-2016-22318	1H	282095901	G	0.56226	0.56762	C	0.4283	0.43238	0.490855
JHI-Hv50k-2016-22324	1H	282332359	C	0.49811	0.50286	T	0.49245	0.49714	0.499984
JHI-Hv50k-2016-22328	1H	282395221	G	0.93396	0.93396	T	0.06604	0.06604	0.123357
JHI-Hv50k-2016-22341	1H	282735502	C	0.55849	0.56489	T	0.43019	0.43511	0.491579
JHI-Hv50k-2016-22354	1H	283189934	G	0.56038	0.56679	T	0.4283	0.43321	0.491078
JHI-Hv50k-2016-22373	1H	284127686	T	0.93396	0.93396	C	0.06604	0.06604	0.123357
JHI-Hv50k-2016-22410	1H	284346603	A	0.5	0.5038	G	0.49245	0.4962	0.499971
JHI-Hv50k-2016-22442	1H	284622625	T	0.53774	0.54183	A	0.45472	0.45817	0.496501
JHI-Hv50k-2016-22497	1H	286172414	G	0.56226	0.56762	C	0.4283	0.43238	0.490855
JHI-Hv50k-2016-22526	1H	286846245	T	0.93396	0.93396	A	0.06604	0.06604	0.123357
JHI-Hv50k-2016-22546	1H	286877287	G	0.56038	0.56679	A	0.4283	0.43321	0.491078
JHI-Hv50k-2016-22575	1H	287275722	C	0.56226	0.56654	T	0.43019	0.43346	0.491145
JHI-Hv50k-2016-22580	1H	287278540	A	0.53208	0.53612	T	0.46038	0.46388	0.497391
JHI-Hv50k-2016-22586	1H	287352331	G	0.25472	0.54217	C	0.21509	0.45783	0.496443
JHI-Hv50k-2016-22596	1H	287602597	T	0.93396	0.93396	C	0.06604	0.06604	0.123357
JHI-Hv50k-2016-22624	1H	288097527	A	0.93396	0.93396	G	0.06604	0.06604	0.123357
BOPA2_12_30306	1H	288110696	A	0.9283	0.93359	G	0.06604	0.06641	0.123999
JHI-Hv50k-2016-22690	1H	288528705	T	0.93019	0.93019	A	0.06981	0.06981	0.129873
JHI-Hv50k-2016-22726	1H	288793487	G	0.93019	0.93019	A	0.06981	0.06981	0.129873
JHI-Hv50k-2016-22744	1H	289318680	G	0.63774	0.64137	T	0.3566	0.35863	0.460029
JHI-Hv50k-2016-22762	1H	289521358	G	0.84906	0.85389	T	0.14528	0.14611	0.249524
JHI-Hv50k-2016-22760	1H	289524917	G	0.63585	0.63947	A	0.35849	0.36053	0.461096
JHI-Hv50k-2016-22816	1H	290180708	G	0.63774	0.64137	T	0.3566	0.35863	0.460029
JHI-Hv50k-2016-22829	1H	290664854	C	0.5	0.50476	T	0.49057	0.49524	0.499955
JHI-Hv50k-2016-22836	1H	291669843	T	0.51321	0.51908	C	0.47547	0.48092	0.499272
JHI-Hv50k-2016-22850	1H	292180451	G	0.60943	0.61407	A	0.38302	0.38593	0.473976
JHI-Hv50k-2016-22858	1H	292536879	C	0.51321	0.51711	T	0.47925	0.48289	0.499414
JHI-Hv50k-2016-22859	1H	292657673	T	0.60755	0.61217	C	0.38491	0.38783	0.474836
JHI-Hv50k-2016-22869	1H	292976231	C	0.51321	0.51711	T	0.47925	0.48289	0.499414
JHI-Hv50k-2016-22875	1H	293268731	T	0.51321	0.51908	C	0.47547	0.48092	0.499272
JHI-Hv50k-2016-22885	1H	293670251	C	0.60943	0.61524	T	0.38113	0.38476	0.473439
JHI-Hv50k-2016-22887	1H	293674322	C	0.60943	0.61407	T	0.38302	0.38593	0.473976
JHI-Hv50k-2016-22898	1H	294164501	G	0.60755	0.61217	A	0.38491	0.38783	0.474836
JHI-Hv50k-2016-22894	1H	294168816	T	0.60189	0.60994	G	0.38491	0.39006	0.475826
JHI-Hv50k-2016-22927	1H	294733886	C	0.51509	0.51901	T	0.47736	0.48099	0.499277
SCRI_RS_193640	1H	296533205	G	0.51509	0.51901	A	0.47736	0.48099	0.499277
JHI-Hv50k-2016-23022	1H	296535809	C	0.51509	0.51901	T	0.47736	0.48099	0.499277
JHI-Hv50k-2016-23021	1H	296536579	G	0.60943	0.61407	A	0.38302	0.38593	0.473976
JHI-Hv50k-2016-23034	1H	296967773	G	0.28491	0.60159	A	0.18868	0.39841	0.479359
JHI-Hv50k-2016-23041	1H	297092292	C	0.51321	0.5181	T	0.47736	0.4819	0.499345
JHI-Hv50k-2016-23064	1H	297334230	T	0.51887	0.52083	C	0.47736	0.47917	0.499132
SCRI_RS_141511	1H	297414672	A	0.51509	0.51901	G	0.47736	0.48099	0.499277
BOPA1_2851-848	1H	297728534	G	0.51509	0.52099	A	0.47358	0.47901	0.499119
JHI-Hv50k-2016-23106	1H	297728534	G	0.51509	0.52099	A	0.47358	0.47901	0.499119
JHI-Hv50k-2016-23109	1H	297730969	G	0.51321	0.51711	A	0.47925	0.48289	0.499414
JHI-Hv50k-2016-23159	1H	298101551	G	0.60943	0.61407	C	0.38302	0.38593	0.473976
JHI-Hv50k-2016-23189	1H	298125194	T	0.50566	0.50951	A	0.48679	0.49049	0.499819
JHI-Hv50k-2016-23192	1H	298831042	C	0.68679	0.6907	T	0.30755	0.3093	0.427267
BOPA2_12_30562	1H	298838723	G	0.84528	0.84848	A	0.15094	0.15152	0.257123
JHI-Hv50k-2016-23217	1H	300184449	G	0.95849	0.96212	A	0.03774	0.03788	0.0728902
BOPA2_12_30043	1H	300639088	G	0.86604	0.87097	A	0.1283	0.12903	0.224763
BOPA2_12_10489	1H	304795182	A	0.97547	0.97917	G	0.02075	0.02083	0.0407922
JHI-Hv50k-2016-23277	1H	304925095	C	0.80189	0.80798	A	0.19057	0.19202	0.310297
JHI-Hv50k-2016-23273	1H	304985042	T	0.68302	0.68691	G	0.31132	0.31309	0.430129
BOPA2_12_10300	1H	305683586	A	0.87736	0.88068	G	0.11887	0.11932	0.210165
JHI-Hv50k-2016-23330	1H	305960498	A	0.64906	0.65399	G	0.3434	0.34601	0.452574
BOPA1_ABC11913-1-1-104	1H	306533607	G	0.84528	0.85171	C	0.14717	0.14829	0.2526
JHI-Hv50k-2016-23368	1H	307010067	C	0.6566	0.66286	T	0.33396	0.33714	0.446953
JHI-Hv50k-2016-23394	1H	307492706	G	0.6566	0.66286	T	0.33396	0.33714	0.446953
BOPA1_7090-1260	1H	308262183	A	0.88491	0.88826	G	0.11132	0.11174	0.198508
JHI-Hv50k-2016-23414	1H	308267661	G	0.53585	0.53686	C	0.46226	0.46314	0.497283
BOPA1_1866-866	1H	308808104	A	0.88491	0.88826	C	0.11132	0.11174	0.198508
BOPA2_12_30404	1H	308808104	A	0.88302	0.88805	C	0.11132	0.11195	0.198834
JHI-Hv50k-2016-23430	1H	309098599	G	0.81509	0.82129	A	0.17736	0.17871	0.293545
BOPA2_12_31381	1H	309775495	A	0.81698	0.82163	G	0.17736	0.17837	0.293108
JHI-Hv50k-2016-23486	1H	309783816	T	0.80755	0.81992	C	0.17736	0.18008	0.295302
JHI-Hv50k-2016-23511	1H	310020255	A	0.65849	0.66987	G	0.32453	0.33013	0.442288
JHI-Hv50k-2016-23499	1H	310044107	C	0.81698	0.82634	T	0.1717	0.17366	0.287004
JHI-Hv50k-2016-23586	1H	311180138	C	0.50943	0.51527	G	0.47925	0.48473	0.499534
JHI-Hv50k-2016-23594	1H	311281241	A	0.68491	0.69143	G	0.30566	0.30857	0.426709
JHI-Hv50k-2016-23613	1H	311594109	C	0.83774	0.84411	T	0.15472	0.15589	0.263177
JHI-Hv50k-2016-23624	1H	311782712	G	0.83585	0.84061	A	0.15849	0.15939	0.26797
JHI-Hv50k-2016-23640	1H	311792290	C	0.55094	0.55832	T	0.43585	0.44168	0.493198
JHI-Hv50k-2016-23647	1H	311909500	A	0.83774	0.8425	G	0.1566	0.1575	0.265387
JHI-Hv50k-2016-23670	1H	312086642	T	0.50943	0.51136	A	0.48679	0.48864	0.499742
SCRI_RS_124377	1H	312376845	G	0.53019	0.55424	A	0.42642	0.44576	0.494116
JHI-Hv50k-2016-23694	1H	312377430	T	0.56226	0.57088	C	0.42264	0.42912	0.489952
JHI-Hv50k-2016-23706	1H	312425755	T	0.56038	0.56571	C	0.43019	0.43429	0.491364
JHI-Hv50k-2016-23721	1H	312961557	G	0.56226	0.56654	A	0.43019	0.43346	0.491145
JHI-Hv50k-2016-23727	1H	313072983	A	0.56226	0.56654	G	0.43019	0.43346	0.491145
BOPA1_4020-643	1H	313531156	A	0.56038	0.56571	T	0.43019	0.43429	0.491364
JHI-Hv50k-2016-23754	1H	313531156	A	0.56038	0.56571	T	0.43019	0.43429	0.491364
JHI-Hv50k-2016-23818	1H	314358312	C	0.56038	0.56571	T	0.43019	0.43429	0.491364
SCRI_RS_143927	1H	314358312	G	0.55849	0.56489	A	0.43019	0.43511	0.491579
SCRI_RS_189586	1H	314625224	T	0.56038	0.56464	C	0.43208	0.43536	0.491643
JHI-Hv50k-2016-23829	1H	314628244	C	0.55283	0.56238	T	0.43019	0.43762	0.492217
JHI-Hv50k-2016-23852	1H	315077992	G	0.58491	0.58824	T	0.40943	0.41176	0.484427
BOPA2_12_31208	1H	315281923	C	0.56038	0.56571	G	0.43019	0.43429	0.491364
JHI-Hv50k-2016-23940	1H	315894235	C	0.70755	0.71293	A	0.28491	0.28707	0.409322
JHI-Hv50k-2016-23949	1H	316189584	A	0.83396	0.83871	G	0.16038	0.16129	0.270551
JHI-Hv50k-2016-23975	1H	316502141	G	0.70755	0.71565	A	0.28113	0.28435	0.40699
JHI-Hv50k-2016-24013	1H	317165849	G	0.55849	0.56489	A	0.43019	0.43511	0.491579
BOPA1_4163-1786	1H	317349136	G	0.86604	0.86932	A	0.13019	0.13068	0.227205
SCRI_RS_186830	1H	318612652	T	0.70755	0.71293	C	0.28491	0.28707	0.409322
JHI-Hv50k-2016-24165	1H	319690671	A	0.56038	0.56571	G	0.43019	0.43429	0.491364
JHI-Hv50k-2016-24315	1H	320677778	G	0.70755	0.71977	T	0.27547	0.28023	0.403402
JHI-Hv50k-2016-24407	1H	322935784	C	0.55849	0.56597	T	0.4283	0.43403	0.491296
SCRI_RS_213103	1H	322937018	C	0.56038	0.56571	T	0.43019	0.43429	0.491364
JHI-Hv50k-2016-24426	1H	323379318	G	0.83585	0.84221	A	0.1566	0.15779	0.265785
JHI-Hv50k-2016-24433	1H	323568823	G	0.56038	0.56464	A	0.43208	0.43536	0.491643
JHI-Hv50k-2016-24486	1H	324227497	G	0.81698	0.82008	A	0.17925	0.17992	0.295098
JHI-Hv50k-2016-24484	1H	324227782	A	0.54528	0.55364	G	0.43962	0.44636	0.494246
JHI-Hv50k-2016-24508	1H	324981981	T	0.8434	0.8482	C	0.15094	0.1518	0.257514
JHI-Hv50k-2016-24530	1H	324983607	G	0.8434	0.84981	A	0.14906	0.15019	0.255266
JHI-Hv50k-2016-24542	1H	325205357	C	0.88302	0.88636	A	0.11321	0.11364	0.201452
JHI-Hv50k-2016-24536	1H	325208595	T	0.90566	0.91082	C	0.08868	0.08918	0.162454
JHI-Hv50k-2016-24582	1H	325215050	C	0.90566	0.90909	T	0.09057	0.09091	0.165291
JHI-Hv50k-2016-24600	1H	325457163	G	0.63774	0.64504	A	0.35094	0.35496	0.457927
JHI-Hv50k-2016-24596	1H	325462484	G	0.63208	0.63931	C	0.3566	0.36069	0.461185
JHI-Hv50k-2016-24624	1H	325883858	A	0.78868	0.79317	G	0.20566	0.20683	0.328103
JHI-Hv50k-2016-24633	1H	326051296	C	0.56604	0.57034	T	0.42642	0.42966	0.490105
JHI-Hv50k-2016-24648	1H	326245393	G	0.64151	0.6501	A	0.34528	0.3499	0.45494
JHI-Hv50k-2016-24730	1H	327636011	G	0.64906	0.65399	A	0.3434	0.34601	0.452574
JHI-Hv50k-2016-24745	1H	327803074	C	0.23208	0.82	T	0.05094	0.18	0.2952
JHI-Hv50k-2016-24762	1H	328466564	T	0.6283	0.63429	C	0.36226	0.36571	0.463932
SCRI_RS_155439	1H	328470271	C	0.62642	0.63359	G	0.36226	0.36641	0.464307
SCRI_RS_7197	1H	329203753	G	0.52075	0.52471	A	0.4717	0.47529	0.498779
JHI-Hv50k-2016-24851	1H	329205737	T	0.5283	0.53232	C	0.46415	0.46768	0.497911
SCRI_RS_132604	1H	329205798	T	0.5283	0.53435	C	0.46038	0.46565	0.49764
JHI-Hv50k-2016-24838	1H	329207310	A	0.49623	0.5	T	0.49623	0.5	0.5
JHI-Hv50k-2016-24899	1H	329364962	C	0.92453	0.92803	A	0.0717	0.07197	0.133581
JHI-Hv50k-2016-24903	1H	329711329	A	0.83774	0.83774	C	0.16226	0.16226	0.271863
JHI-Hv50k-2016-24921	1H	329809981	A	0.90943	0.91288	T	0.08679	0.08712	0.15906
JHI-Hv50k-2016-25001	1H	329918313	A	0.57547	0.57765	G	0.42075	0.42235	0.487941
JHI-Hv50k-2016-24990	1H	329920191	G	0.63585	0.65058	A	0.34151	0.34942	0.454651
JHI-Hv50k-2016-24939	1H	329939506	C	0.52264	0.52462	G	0.47358	0.47538	0.498788
JHI-Hv50k-2016-25043	1H	330240621	T	0.57358	0.57576	A	0.42264	0.42424	0.488521
SCRI_RS_236235	1H	330240747	C	0.57925	0.58365	T	0.41321	0.41635	0.486005
SCRI_RS_151874	1H	330714327	G	0.65283	0.65779	A	0.33962	0.34221	0.450205
JHI-Hv50k-2016-25062	1H	330715815	C	0.59623	0.60076	T	0.39623	0.39924	0.479695
BOPA2_12_30592	1H	331010444	A	0.64906	0.65524	C	0.34151	0.34476	0.451801
BOPA2_12_10938	1H	331015673	C	0.90189	0.90359	G	0.09623	0.09641	0.17423
JHI-Hv50k-2016-25140	1H	331015702	T	0.65094	0.65465	C	0.3434	0.34535	0.452167
JHI-Hv50k-2016-25138	1H	331015882	C	0.90377	0.90377	T	0.09623	0.09623	0.17394
SCRI_RS_230133	1H	331359250	G	0.92453	0.9369	A	0.06226	0.0631	0.118237
JHI-Hv50k-2016-25237	1H	331359523	C	0.90943	0.91288	A	0.08679	0.08712	0.15906
SCRI_RS_216058	1H	332042680	G	0.93585	0.93585	A	0.06415	0.06415	0.12007
JHI-Hv50k-2016-25298	1H	332043281	T	0.90377	0.90377	C	0.09623	0.09623	0.17394
BOPA1_ConsensusGBS0371-2	1H	332141076	A	0.64528	0.64773	G	0.35094	0.35227	0.456352
JHI-Hv50k-2016-25364	1H	332509703	T	0.63774	0.64381	C	0.35283	0.35619	0.458637
JHI-Hv50k-2016-25399	1H	332745036	C	0.51321	0.51515	G	0.48302	0.48485	0.499541
JHI-Hv50k-2016-25378	1H	332745488	A	0.51321	0.51515	C	0.48302	0.48485	0.499541
BOPA2_12_11209	1H	333039926	G	0.89057	0.89394	C	0.10566	0.10606	0.189623
SCRI_RS_138691	1H	333135439	G	0.87736	0.87902	A	0.12075	0.12098	0.212688
JHI-Hv50k-2016-23993	1H	333136306	T	0.55472	0.56322	A	0.43019	0.43678	0.492006
JHI-Hv50k-2016-25432	1H	333193192	G	0.89245	0.89245	A	0.10755	0.10755	0.191966
JHI-Hv50k-2016-25431	1H	333195055	T	0.55094	0.55408	C	0.4434	0.44592	0.494151
JHI-Hv50k-2016-25445	1H	333457570	C	0.89245	0.89414	A	0.10566	0.10586	0.189307
JHI-Hv50k-2016-25561	1H	334277651	A	0.86981	0.87643	G	0.12264	0.12357	0.216601
JHI-Hv50k-2016-25580	1H	334351974	T	0.77547	0.78286	C	0.21509	0.21714	0.33998
BOPA2_12_31272	1H	334357194	A	0.66038	0.6654	G	0.33208	0.3346	0.445286
JHI-Hv50k-2016-25728	1H	334953298	T	0.66226	0.66603	C	0.33208	0.33397	0.444868
JHI-Hv50k-2016-25723	1H	334957226	T	0.57736	0.57845	C	0.42075	0.42155	0.487691
SCRI_RS_171543	1H	334960439	G	0.55472	0.55787	A	0.43962	0.44213	0.493302
SCRI_RS_7813	1H	334966254	C	0.73208	0.73764	T	0.26038	0.26236	0.387054
JHI-Hv50k-2016-25683	1H	334970027	A	0.50377	0.51248	C	0.47925	0.48752	0.499688
JHI-Hv50k-2016-25670	1H	334973409	C	0.73208	0.73764	T	0.26038	0.26236	0.387054
JHI-Hv50k-2016-25731	1H	335112466	T	0.59245	0.5981	C	0.39811	0.4019	0.480753
JHI-Hv50k-2016-25738	1H	335478142	C	0.54528	0.55048	T	0.44528	0.44952	0.494904
SCRI_RS_134850	1H	335481893	C	0.84528	0.84848	T	0.15094	0.15152	0.257123
JHI-Hv50k-2016-25743	1H	335481909	C	0.73396	0.73814	A	0.26038	0.26186	0.386579
JHI-Hv50k-2016-25880	1H	336524840	A	0.62075	0.62667	G	0.36981	0.37333	0.467909
JHI-Hv50k-2016-25970	1H	337765968	C	0.69623	0.70152	T	0.29623	0.29848	0.418779
BOPA1_8224-561	1H	337766588	A	0.56604	0.56926	G	0.4283	0.43074	0.490406
JHI-Hv50k-2016-26014	1H	337773284	A	0.53962	0.54167	G	0.4566	0.45833	0.496527
JHI-Hv50k-2016-26048	1H	338131933	C	0.7283	0.73384	T	0.26415	0.26616	0.390638
JHI-Hv50k-2016-26073	1H	338140840	C	0.71698	0.73077	T	0.26415	0.26923	0.39349
JHI-Hv50k-2016-26080	1H	338189448	A	0.93585	0.93762	G	0.06226	0.06238	0.116977
SCRI_RS_189248	1H	338190034	A	0.50566	0.50854	G	0.48868	0.49146	0.499854
JHI-Hv50k-2016-26103	1H	338789091	A	0.50943	0.5104	C	0.48868	0.4896	0.499784
JHI-Hv50k-2016-26139	1H	339332531	T	0.79811	0.79962	C	0.2	0.20038	0.320456
BOPA2_12_31134	1H	339332954	G	0.50943	0.51136	A	0.48679	0.48864	0.499742
SCRI_RS_122889	1H	339963117	A	0.72642	0.73333	G	0.26415	0.26667	0.391114
JHI-Hv50k-2016-26201	1H	339964326	A	0.92642	0.95898	G	0.03962	0.04102	0.0786747
JHI-Hv50k-2016-26222	1H	340297996	G	0.79811	0.80266	A	0.19623	0.19734	0.316794
SCRI_RS_189920	1H	340307456	G	0.72453	0.73282	A	0.26415	0.26718	0.39159
JHI-Hv50k-2016-26213	1H	340308467	C	0.73019	0.73435	T	0.26415	0.26565	0.39016
SCRI_RS_189898	1H	340310354	C	0.73019	0.73435	T	0.26415	0.26565	0.39016
JHI-Hv50k-2016-26255	1H	340539780	C	0.72453	0.73282	T	0.26415	0.26718	0.39159
SCRI_RS_219043	1H	341124939	C	0.72642	0.73333	T	0.26415	0.26667	0.391114
JHI-Hv50k-2016-26297	1H	341647646	C	0.79623	0.79924	A	0.2	0.20076	0.320911
JHI-Hv50k-2016-26334	1H	342117845	G	0.91509	0.91509	A	0.08491	0.08491	0.155401
SCRI_RS_116685	1H	342118049	A	0.50377	0.50568	C	0.49245	0.49432	0.499935
SCRI_RS_160466	1H	342123738	T	0.73019	0.73435	C	0.26415	0.26565	0.39016
JHI-Hv50k-2016-26344	1H	342124129	T	0.77547	0.78137	C	0.21698	0.21863	0.341662
JHI-Hv50k-2016-26359	1H	342720997	A	0.93774	0.93951	G	0.06038	0.06049	0.113662
JHI-Hv50k-2016-26363	1H	342722870	G	0.51887	0.51887	C	0.48113	0.48113	0.499288
JHI-Hv50k-2016-26365	1H	342968689	T	0.78113	0.78409	C	0.21509	0.21591	0.338586
SCRI_RS_229932	1H	342969233	C	0.73019	0.73435	T	0.26415	0.26565	0.39016
JHI-Hv50k-2016-26397	1H	343416772	C	0.91132	0.91477	T	0.08491	0.08523	0.155932
JHI-Hv50k-2016-26439	1H	343656242	G	0.80189	0.80492	A	0.19434	0.19508	0.314048
JHI-Hv50k-2016-26496	1H	343719988	G	0.72453	0.73143	A	0.26604	0.26857	0.39288
JHI-Hv50k-2016-26511	1H	343846678	T	0.71509	0.71645	C	0.28302	0.28355	0.406299
SCRI_RS_170542	1H	344129827	C	0.52642	0.53244	T	0.46226	0.46756	0.497895
JHI-Hv50k-2016-26556	1H	344130889	C	0.5283	0.53333	T	0.46226	0.46667	0.497778
JHI-Hv50k-2016-26530	1H	344139183	T	0.5283	0.5364	C	0.4566	0.4636	0.49735
SCRI_RS_125407	1H	344746488	G	0.72075	0.72901	A	0.26792	0.27099	0.395109
JHI-Hv50k-2016-26630	1H	345190277	T	0.5434	0.54962	A	0.44528	0.45038	0.495076
JHI-Hv50k-2016-26645	1H	345874741	A	0.63396	0.63878	C	0.35849	0.36122	0.46148
BOPA1_4793-777	1H	346014622	G	0.62642	0.63118	A	0.36604	0.36882	0.465584
JHI-Hv50k-2016-26700	1H	346578486	A	0.83962	0.8428	G	0.1566	0.1572	0.264976
BOPA1_5297-796	1H	346579508	A	0.75283	0.76	G	0.23774	0.24	0.3648
JHI-Hv50k-2016-26705	1H	346747365	G	0.84151	0.8431	A	0.1566	0.1569	0.264565
JHI-Hv50k-2016-26709	1H	347014393	C	0.64717	0.65458	T	0.34151	0.34542	0.45221
JHI-Hv50k-2016-26750	1H	347429998	T	0.57736	0.57955	C	0.41887	0.42045	0.487344
JHI-Hv50k-2016-26782	1H	348014387	C	0.83208	0.83365	T	0.16604	0.16635	0.277355
JHI-Hv50k-2016-26799	1H	348055459	C	0.60566	0.60911	T	0.38868	0.39089	0.47619
JHI-Hv50k-2016-26797	1H	348059904	T	0.83208	0.83365	C	0.16604	0.16635	0.277355
SCRI_RS_152642	1H	348326405	G	0.62075	0.62548	A	0.3717	0.37452	0.46851
JHI-Hv50k-2016-26803	1H	348328216	G	0.84528	0.84688	A	0.15283	0.15312	0.259349
JHI-Hv50k-2016-26822	1H	348523455	T	0.62264	0.62619	G	0.3717	0.37381	0.468152
JHI-Hv50k-2016-26859	1H	348978278	G	0.62075	0.62548	A	0.3717	0.37452	0.46851
SCRI_RS_221609	1H	348979180	G	0.62075	0.62548	T	0.3717	0.37452	0.46851
JHI-Hv50k-2016-26824	1H	349096043	C	0.84528	0.84688	T	0.15283	0.15312	0.259349
JHI-Hv50k-2016-26878	1H	349858858	C	0.63019	0.63985	G	0.35472	0.36015	0.460884
JHI-Hv50k-2016-26883	1H	350004368	A	0.63962	0.65318	G	0.33962	0.34682	0.453072
BOPA2_12_30350	1H	350302602	G	0.63962	0.64326	A	0.35472	0.35674	0.458953
JHI-Hv50k-2016-26890	1H	350302602	G	0.63962	0.64326	A	0.35472	0.35674	0.458953
JHI-Hv50k-2016-26888	1H	350303846	A	0.63962	0.64326	G	0.35472	0.35674	0.458953
JHI-Hv50k-2016-26905	1H	350524618	G	0.51887	0.51887	C	0.48113	0.48113	0.499288
JHI-Hv50k-2016-26918	1H	350841749	G	0.76226	0.7666	A	0.23208	0.2334	0.357849
JHI-Hv50k-2016-26930	1H	351287617	A	0.51698	0.51796	T	0.48113	0.48204	0.499355
JHI-Hv50k-2016-26939	1H	351773884	G	0.78868	0.79017	T	0.20943	0.20983	0.331603
JHI-Hv50k-2016-26957	1H	351797804	G	0.78868	0.79017	A	0.20943	0.20983	0.331603
SCRI_RS_141598	1H	351864573	C	0.6566	0.66412	T	0.33208	0.33588	0.446129
BOPA1_8717-244	1H	352305952	A	0.59245	0.5981	G	0.39811	0.4019	0.480753
JHI-Hv50k-2016-26964	1H	352533141	C	0.99057	0.99057	T	0.00943	0.00943	0.0186822
JHI-Hv50k-2016-26982	1H	353019065	T	0.79434	0.79584	C	0.20377	0.20416	0.324957
JHI-Hv50k-2016-26989	1H	353480403	G	0.9566	0.9566	A	0.0434	0.0434	0.0830329
JHI-Hv50k-2016-27002	1H	353812901	A	0.94906	0.94906	G	0.05094	0.05094	0.0966902
JHI-Hv50k-2016-27008	1H	354054323	G	0.5434	0.54753	C	0.44906	0.45247	0.495482
JHI-Hv50k-2016-27013	1H	354068471	T	0.56981	0.57306	C	0.42453	0.42694	0.489324
JHI-Hv50k-2016-27021	1H	354313904	A	0.59245	0.59583	G	0.40189	0.40417	0.481633
JHI-Hv50k-2016-27040	1H	354538064	C	0.98491	0.99051	T	0.00943	0.00949	0.0187999
JHI-Hv50k-2016-27050	1H	354890454	G	0.62264	0.62619	A	0.3717	0.37381	0.468152
BOPA1_1294-473	1H	355336584	G	0.73019	0.73435	A	0.26415	0.26565	0.39016
BOPA2_12_11107	1H	355434965	G	0.99057	0.99057	A	0.00943	0.00943	0.0186822
JHI-Hv50k-2016-27089	1H	355515556	G	0.62264	0.625	A	0.37358	0.375	0.46875
BOPA2_12_30110	1H	355763171	G	0.61698	0.62286	A	0.37358	0.37714	0.469811
SCRI_RS_172170	1H	355819739	A	0.51132	0.51326	G	0.48491	0.48674	0.499648
JHI-Hv50k-2016-27127	1H	355999208	T	0.57736	0.58065	C	0.41698	0.41935	0.486991
BOPA2_12_30694	1H	355999420	G	0.62075	0.62786	A	0.36792	0.37214	0.467304
JHI-Hv50k-2016-27177	1H	356306325	C	0.61132	0.6148	T	0.38302	0.3852	0.473642
JHI-Hv50k-2016-27205	1H	356427776	T	0.61132	0.61714	A	0.37925	0.38286	0.472556
JHI-Hv50k-2016-27240	1H	356691716	C	0.62075	0.62548	T	0.3717	0.37452	0.46851
BOPA1_4716-1205	1H	356693611	T	0.62075	0.62311	A	0.37547	0.37689	0.469688
JHI-Hv50k-2016-27275	1H	356702776	A	0.62075	0.62429	G	0.37358	0.37571	0.469104
JHI-Hv50k-2016-27365	1H	357182707	T	0.57547	0.57765	C	0.42075	0.42235	0.487941
JHI-Hv50k-2016-27416	1H	357294812	T	0.9566	0.9566	C	0.0434	0.0434	0.0830329
BOPA1_3689-1101	1H	357295121	G	0.63962	0.64205	A	0.3566	0.35795	0.459644
JHI-Hv50k-2016-27468	1H	357569122	G	0.6	0.60342	A	0.39434	0.39658	0.478609
JHI-Hv50k-2016-27498	1H	357833884	G	0.97547	0.97547	A	0.02453	0.02453	0.0478566
JHI-Hv50k-2016-27479	1H	357841864	T	0.97547	0.97547	C	0.02453	0.02453	0.0478566
JHI-Hv50k-2016-27514	1H	358096900	T	0.63774	0.64015	G	0.35849	0.35985	0.460716
SCRI_RS_163127	1H	358151636	A	0.50943	0.5104	C	0.48868	0.4896	0.499784
SCRI_RS_118168	1H	358372238	T	0.54151	0.54771	A	0.44717	0.45229	0.495448
JHI-Hv50k-2016-27563	1H	358809981	A	0.51698	0.51992	C	0.47736	0.48008	0.499206
JHI-Hv50k-2016-27562	1H	358811153	T	0.54151	0.54459	A	0.45283	0.45541	0.496023
JHI-Hv50k-2016-27566	1H	359069431	A	0.53962	0.54373	G	0.45283	0.45627	0.496175
JHI-Hv50k-2016-27571	1H	359504520	G	0.49811	0.5019	A	0.49434	0.4981	0.499993
SCRI_RS_109060	1H	359725995	T	0.49623	0.50191	C	0.49245	0.49809	0.499993
JHI-Hv50k-2016-27619	1H	359992133	C	0.53962	0.54269	T	0.45472	0.45731	0.496355
JHI-Hv50k-2016-27637	1H	360026692	C	0.58491	0.58824	T	0.40943	0.41176	0.484427
BOPA1_ABC13652-1-2-156	1H	360120811	G	0.57925	0.58588	A	0.40943	0.41412	0.485249
JHI-Hv50k-2016-27651	1H	360123408	C	0.58491	0.58824	T	0.40943	0.41176	0.484427
JHI-Hv50k-2016-27685	1H	360566441	C	0.58113	0.58223	T	0.41698	0.41777	0.486476
JHI-Hv50k-2016-27680	1H	360570708	A	0.7566	0.76091	G	0.23774	0.23909	0.363852
SCRI_RS_158003	1H	360661211	C	0.50566	0.50662	T	0.49245	0.49338	0.499912
SCRI_RS_153733	1H	360684767	G	0.84528	0.84848	A	0.15094	0.15152	0.257123
JHI-Hv50k-2016-27713	1H	360688835	G	0.60189	0.60302	T	0.39623	0.39698	0.478774
JHI-Hv50k-2016-27700	1H	360699759	T	0.61698	0.62049	C	0.37736	0.37951	0.470964
BOPA2_12_30786	1H	360700394	G	0.61698	0.62049	C	0.37736	0.37951	0.470964
SCRI_RS_119743	1H	360880505	C	0.61698	0.61932	T	0.37925	0.38068	0.471525
BOPA2_12_30672	1H	360882766	C	0.61698	0.62167	A	0.37547	0.37833	0.470393
JHI-Hv50k-2016-27727	1H	361108606	C	0.58491	0.58935	T	0.40755	0.41065	0.484033
JHI-Hv50k-2016-27737	1H	361249105	G	0.61887	0.62121	A	0.37736	0.37879	0.470616
JHI-Hv50k-2016-27738	1H	361249264	A	0.53585	0.53788	T	0.46038	0.46212	0.49713
SCRI_RS_148600	1H	361253182	A	0.61887	0.62239	G	0.37547	0.37761	0.470041
JHI-Hv50k-2016-27759	1H	361255002	C	0.51321	0.51321	G	0.48679	0.48679	0.499651
JHI-Hv50k-2016-27761	1H	361255390	T	0.55849	0.55955	C	0.43962	0.44045	0.492908
JHI-Hv50k-2016-27768	1H	361261023	A	0.58302	0.58523	G	0.41321	0.41477	0.485472
JHI-Hv50k-2016-27787	1H	361475356	A	0.58302	0.58634	C	0.41132	0.41366	0.485091
JHI-Hv50k-2016-27785	1H	361475491	A	0.57925	0.58365	G	0.41321	0.41635	0.486005
BOPA2_12_30499	1H	361656903	G	0.56038	0.56144	A	0.43774	0.43856	0.49245
JHI-Hv50k-2016-27810	1H	361657461	G	0.62075	0.62311	T	0.37547	0.37689	0.469688
JHI-Hv50k-2016-27806	1H	361658403	A	0.60566	0.60795	G	0.39057	0.39205	0.476694
BOPA2_12_30478	1H	361658431	A	0.60566	0.60795	G	0.39057	0.39205	0.476694
JHI-Hv50k-2016-27805	1H	361659355	T	0.60755	0.60985	G	0.38868	0.39015	0.475866
BOPA1_7800-594	1H	361727047	G	0.60189	0.60531	C	0.39245	0.39469	0.47782
JHI-Hv50k-2016-27837	1H	361732629	A	0.60189	0.60646	G	0.39057	0.39354	0.477333
JHI-Hv50k-2016-27829	1H	361739228	A	0.60566	0.60795	G	0.39057	0.39205	0.476694
BOPA1_5798-867	1H	362148631	A	0.52453	0.53155	C	0.46226	0.46845	0.498009
JHI-Hv50k-2016-27862	1H	362699511	C	0.93019	0.93371	G	0.06604	0.06629	0.123791
JHI-Hv50k-2016-27864	1H	362702043	G	0.60377	0.60606	T	0.39245	0.39394	0.477503
JHI-Hv50k-2016-27868	1H	362737709	G	0.60377	0.60606	A	0.39245	0.39394	0.477503
JHI-Hv50k-2016-27873	1H	363100003	T	0.60189	0.60646	A	0.39057	0.39354	0.477333
SCRI_RS_198546	1H	363398385	A	0.59245	0.60153	C	0.39245	0.39847	0.479383
JHI-Hv50k-2016-27889	1H	363747311	A	0.55849	0.56061	T	0.43774	0.43939	0.492653
JHI-Hv50k-2016-27903	1H	363941893	G	0.60189	0.60531	T	0.39245	0.39469	0.47782
JHI-Hv50k-2016-27916	1H	364054031	G	0.44528	0.92188	A	0.03774	0.07812	0.144035
JHI-Hv50k-2016-27921	1H	364182478	G	0.55472	0.55787	C	0.43962	0.44213	0.493302
SCRI_RS_14834	1H	364363526	T	0.56981	0.57744	A	0.41698	0.42256	0.488006
JHI-Hv50k-2016-27929	1H	364364098	C	0.51887	0.52281	A	0.47358	0.47719	0.498959
JHI-Hv50k-2016-27941	1H	364692054	G	0.60566	0.61143	T	0.38491	0.38857	0.475167
JHI-Hv50k-2016-27948	1H	365018817	G	0.51698	0.52091	T	0.47547	0.47909	0.499126
JHI-Hv50k-2016-27954	1H	365246220	A	0.60566	0.60795	G	0.39057	0.39205	0.476694
JHI-Hv50k-2016-27961	1H	365629493	C	0.51698	0.5219	A	0.47358	0.4781	0.499041
JHI-Hv50k-2016-27968	1H	365819190	A	0.78679	0.78828	G	0.21132	0.21172	0.333789
JHI-Hv50k-2016-28014	1H	366106504	G	0.54717	0.54924	A	0.44906	0.45076	0.495151
SCRI_RS_153434	1H	366453213	T	0.50189	0.50284	A	0.49623	0.49716	0.499984
BOPA2_12_30243	1H	369048503	A	0.86792	0.87287	G	0.12642	0.12713	0.221936
BOPA1_ABC10636-1-4-285	1H	370302846	C	0.89434	0.89773	G	0.10189	0.10227	0.183622
BOPA2_12_30522	1H	370569348	A	0.81132	0.81285	C	0.18679	0.18715	0.30425
SCRI_RS_167877	1H	370847592	G	0.63396	0.63757	A	0.36038	0.36243	0.462149
BOPA2_12_30348	1H	372168643	A	0.90377	0.91065	G	0.08868	0.08935	0.162733
JHI-Hv50k-2016-28052	1H	373278910	G	0.61698	0.63006	C	0.36226	0.36994	0.466169
JHI-Hv50k-2016-28053	1H	373325657	G	0.5434	0.54649	A	0.45094	0.45351	0.495677
JHI-Hv50k-2016-28062	1H	373430945	T	0.64906	0.65275	C	0.34528	0.34725	0.453335
JHI-Hv50k-2016-28056	1H	373432241	T	0.54528	0.54735	G	0.45094	0.45265	0.495516
SCRI_RS_161643	1H	373496211	C	0.66226	0.66857	T	0.3283	0.33143	0.443168
JHI-Hv50k-2016-28073	1H	373499312	A	0.54528	0.54735	G	0.45094	0.45265	0.495516
JHI-Hv50k-2016-28094	1H	373585397	T	0.8	0.80151	A	0.19811	0.19849	0.318183
BOPA2_12_30710	1H	373586572	A	0.56415	0.56736	G	0.43019	0.43264	0.490925
JHI-Hv50k-2016-28123	1H	373991046	T	0.5	0.50573	C	0.48868	0.49427	0.499934
JHI-Hv50k-2016-28125	1H	373991630	A	0.5	0.5038	T	0.49245	0.4962	0.499971
JHI-Hv50k-2016-28138	1H	374027859	T	0.5566	0.56298	C	0.43208	0.43702	0.492067
JHI-Hv50k-2016-28171	1H	374277542	C	0.51887	0.63073	T	0.30377	0.36927	0.465819
JHI-Hv50k-2016-28218	1H	375482812	G	0.51132	0.51521	C	0.48113	0.48479	0.499537
JHI-Hv50k-2016-28210	1H	375485135	T	0.52453	0.53053	C	0.46415	0.46947	0.498136
JHI-Hv50k-2016-28209	1H	375485154	T	0.51509	0.52099	C	0.47358	0.47901	0.499119
JHI-Hv50k-2016-28251	1H	375895006	C	0.51509	0.52	T	0.47547	0.48	0.4992
JHI-Hv50k-2016-28287	1H	376005574	G	0.80189	0.80798	A	0.19057	0.19202	0.310297
JHI-Hv50k-2016-28274	1H	376124864	C	0.80566	0.80871	G	0.19057	0.19129	0.309396
JHI-Hv50k-2016-28271	1H	376127031	G	0.80566	0.80871	T	0.19057	0.19129	0.309396
JHI-Hv50k-2016-28257	1H	376133022	A	0.38113	0.80159	C	0.09434	0.19841	0.318087
JHI-Hv50k-2016-28315	1H	377123227	G	0.51887	0.52481	C	0.46981	0.47519	0.498769
JHI-Hv50k-2016-28314	1H	377123343	A	0.50189	0.50667	T	0.48868	0.49333	0.499911
JHI-Hv50k-2016-28331	1H	377521773	A	0.53208	0.53612	G	0.46038	0.46388	0.497391
JHI-Hv50k-2016-28364	1H	378136383	G	0.32264	0.67589	A	0.15472	0.32411	0.438125
JHI-Hv50k-2016-28367	1H	378138048	T	0.29434	0.66953	G	0.14528	0.33047	0.442519
BOPA1_7284-710	1H	379465886	A	0.52075	0.52471	G	0.4717	0.47529	0.498779
JHI-Hv50k-2016-28380	1H	379746038	G	0.50377	0.51248	A	0.47925	0.48752	0.499688
BOPA2_12_10198	1H	379746191	G	0.7566	0.75803	A	0.24151	0.24197	0.366841
JHI-Hv50k-2016-28416	1H	379946285	G	0.51887	0.52381	A	0.4717	0.47619	0.498866
JHI-Hv50k-2016-28456	1H	380222243	T	0.71509	0.72053	C	0.27736	0.27947	0.402733
JHI-Hv50k-2016-28435	1H	380240153	C	0.89245	0.89583	T	0.10377	0.10417	0.186637
JHI-Hv50k-2016-28506	1H	380654350	A	0.89245	0.89583	G	0.10377	0.10417	0.186637
JHI-Hv50k-2016-28505	1H	380655994	T	0.71509	0.72053	C	0.27736	0.27947	0.402733
JHI-Hv50k-2016-28497	1H	380658116	G	0.71509	0.71917	A	0.27925	0.28083	0.403929
JHI-Hv50k-2016-28495	1H	380659339	T	0.89245	0.89583	C	0.10377	0.10417	0.186637
JHI-Hv50k-2016-28487	1H	380664724	A	0.89245	0.89583	G	0.10377	0.10417	0.186637
JHI-Hv50k-2016-28482	1H	380669789	T	0.82264	0.8289	C	0.16981	0.1711	0.28365
BOPA2_12_30343	1H	380670033	A	0.81509	0.826	G	0.1717	0.174	0.287448
BOPA2_12_30750	1H	380767269	G	0.61887	0.62121	A	0.37736	0.37879	0.470616
JHI-Hv50k-2016-28572	1H	380894834	G	0.90943	0.91288	T	0.08679	0.08712	0.15906
JHI-Hv50k-2016-28566	1H	380895588	G	0.95849	0.9603	T	0.03962	0.0397	0.0762478
JHI-Hv50k-2016-28548	1H	380916540	G	0.90755	0.91098	A	0.08868	0.08902	0.162191
BOPA1_8743-197	1H	380928690	C	0.62075	0.62311	G	0.37547	0.37689	0.469688
JHI-Hv50k-2016-28600	1H	381353016	C	0.95472	0.95833	A	0.04151	0.04167	0.0798672
JHI-Hv50k-2016-28631	1H	381424537	C	0.72642	0.73055	T	0.26792	0.26945	0.393693
JHI-Hv50k-2016-28635	1H	381424803	G	0.76792	0.77524	A	0.22264	0.22476	0.348486
JHI-Hv50k-2016-28716	1H	381708366	G	0.92264	0.92264	A	0.07736	0.07736	0.142751
JHI-Hv50k-2016-28720	1H	381712220	A	0.52642	0.53143	T	0.46415	0.46857	0.498024
JHI-Hv50k-2016-28721	1H	381712356	C	0.70943	0.71483	T	0.28302	0.28517	0.407696
JHI-Hv50k-2016-28765	1H	381825947	A	0.70755	0.71565	T	0.28113	0.28435	0.40699
JHI-Hv50k-2016-28763	1H	381826099	T	0.70943	0.71483	A	0.28302	0.28517	0.407696
JHI-Hv50k-2016-28745	1H	381831869	A	0.49623	0.50095	G	0.49434	0.49905	0.499998
JHI-Hv50k-2016-28743	1H	381833579	C	0.66226	0.6673	T	0.33019	0.3327	0.444021
JHI-Hv50k-2016-28734	1H	381837706	T	0.49811	0.50286	C	0.49245	0.49714	0.499984
JHI-Hv50k-2016-28733	1H	381838694	G	0.49811	0.50286	A	0.49245	0.49714	0.499984
JHI-Hv50k-2016-28732	1H	381838823	T	0.66226	0.6673	C	0.33019	0.3327	0.444021
JHI-Hv50k-2016-28834	1H	381994124	C	0.95849	0.9603	T	0.03962	0.0397	0.0762478
BOPA1_6118-595	1H	382014306	G	0.66038	0.66794	A	0.3283	0.33206	0.443592
JHI-Hv50k-2016-28880	1H	383017007	A	0.60566	0.60795	T	0.39057	0.39205	0.476694
JHI-Hv50k-2016-28956	1H	383457652	A	0.60943	0.61524	C	0.38113	0.38476	0.473439
JHI-Hv50k-2016-29000	1H	383466696	G	0.79057	0.80268	A	0.19434	0.19732	0.31677
JHI-Hv50k-2016-29001	1H	383466752	T	0.79811	0.8088	C	0.18868	0.1912	0.309285
JHI-Hv50k-2016-29015	1H	383471237	A	0.60755	0.61101	G	0.38679	0.38899	0.475354
JHI-Hv50k-2016-29031	1H	383476786	A	0.78113	0.78707	G	0.21132	0.21293	0.335182
JHI-Hv50k-2016-29039	1H	383478075	T	0.79434	0.80038	C	0.19811	0.19962	0.319544
JHI-Hv50k-2016-29053	1H	383581592	G	0.6283	0.63188	T	0.36604	0.36812	0.465215
JHI-Hv50k-2016-265803	1H	383590813	T	0.61887	0.62004	C	0.37925	0.37996	0.471181
JHI-Hv50k-2016-29056	1H	383592101	T	0.79434	0.80038	A	0.19811	0.19962	0.319544
JHI-Hv50k-2016-29106	1H	383820763	G	0.61698	0.63006	A	0.36226	0.36994	0.466169
JHI-Hv50k-2016-29136	1H	384094622	A	0.6283	0.63068	C	0.36792	0.36932	0.465845
JHI-Hv50k-2016-29135	1H	384094880	G	0.6283	0.63068	A	0.36792	0.36932	0.465845
JHI-Hv50k-2016-29153	1H	384541598	C	0.78491	0.79087	G	0.20755	0.20913	0.330789
JHI-Hv50k-2016-29162	1H	384543117	C	0.79245	0.8	A	0.19811	0.2	0.32
JHI-Hv50k-2016-29216	1H	384738658	C	0.79811	0.80571	A	0.19245	0.19429	0.313083
JHI-Hv50k-2016-29207	1H	384784934	A	0.79434	0.80038	G	0.19811	0.19962	0.319544
JHI-Hv50k-2016-29181	1H	384817896	G	0.55283	0.55598	A	0.44151	0.44402	0.493732
JHI-Hv50k-2016-29177	1H	384818149	T	0.64528	0.65019	A	0.34717	0.34981	0.454886
JHI-Hv50k-2016-29236	1H	384880014	A	0.63396	0.63757	G	0.36038	0.36243	0.462149
BOPA1_5402-929	1H	384880014	A	0.63208	0.63688	G	0.36038	0.36312	0.462528
JHI-Hv50k-2016-29224	1H	384885078	T	0.62264	0.62619	C	0.3717	0.37381	0.468152
JHI-Hv50k-2016-29220	1H	384889394	A	0.6283	0.63188	C	0.36604	0.36812	0.465215
JHI-Hv50k-2016-29259	1H	384995986	A	0.62264	0.62619	G	0.3717	0.37381	0.468152
JHI-Hv50k-2016-29255	1H	384996693	C	0.5283	0.53131	G	0.46604	0.46869	0.498039
JHI-Hv50k-2016-29272	1H	385077255	G	0.63396	0.63757	A	0.36038	0.36243	0.462149
JHI-Hv50k-2016-29271	1H	385077341	C	0.63396	0.63757	T	0.36038	0.36243	0.462149
JHI-Hv50k-2016-29288	1H	385286033	C	0.63396	0.63757	T	0.36038	0.36243	0.462149
JHI-Hv50k-2016-29301	1H	385293982	C	0.63208	0.63567	T	0.36226	0.36433	0.463187
BOPA1_8486-1964	1H	385300251	C	0.63208	0.63567	G	0.36226	0.36433	0.463187
JHI-Hv50k-2016-29333	1H	385767493	G	0.63019	0.63378	A	0.36415	0.36622	0.464206
JHI-Hv50k-2016-29435	1H	386763317	A	0.54151	0.54253	T	0.4566	0.45747	0.496382
JHI-Hv50k-2016-29428	1H	386763900	C	0.60189	0.60762	A	0.38868	0.39238	0.476836
JHI-Hv50k-2016-29421	1H	386764770	T	0.60566	0.60795	C	0.39057	0.39205	0.476694
JHI-Hv50k-2016-29420	1H	386765174	C	0.60377	0.60721	T	0.39057	0.39279	0.477012
JHI-Hv50k-2016-29419	1H	386765424	T	0.60566	0.60911	C	0.38868	0.39089	0.47619
JHI-Hv50k-2016-29418	1H	386765547	C	0.60566	0.61027	T	0.38679	0.38973	0.475681
JHI-Hv50k-2016-29481	1H	386858376	C	0.60566	0.60795	T	0.39057	0.39205	0.476694
JHI-Hv50k-2016-29468	1H	386861678	A	0.60566	0.60795	G	0.39057	0.39205	0.476694
SCRI_RS_156506	1H	386861704	A	0.60566	0.60795	G	0.39057	0.39205	0.476694
JHI-Hv50k-2016-29504	1H	387360766	C	0.54151	0.54356	A	0.45472	0.45644	0.496205
JHI-Hv50k-2016-29552	1H	387529498	C	0.62453	0.62928	T	0.36792	0.37072	0.466573
BOPA2_12_11444	1H	387529755	G	0.99245	0.99245	A	0.00755	0.00755	0.014986
JHI-Hv50k-2016-29539	1H	387541829	T	0.62264	0.625	C	0.37358	0.375	0.46875
JHI-Hv50k-2016-29574	1H	387742676	A	0.58491	0.59273	G	0.40189	0.40727	0.482802
JHI-Hv50k-2016-29607	1H	387974920	A	0.53019	0.53422	C	0.46226	0.46578	0.497658
JHI-Hv50k-2016-29606	1H	387975020	T	0.53019	0.53626	G	0.45849	0.46374	0.49737
JHI-Hv50k-2016-29605	1H	387975053	T	0.53019	0.53524	C	0.46038	0.46476	0.497516
JHI-Hv50k-2016-29600	1H	387975901	C	0.53774	0.54183	G	0.45472	0.45817	0.496501
JHI-Hv50k-2016-29680	1H	388517868	T	0.51887	0.52581	G	0.46792	0.47419	0.498668
SCRI_RS_1445	1H	388523112	C	0.52453	0.53359	T	0.45849	0.46641	0.497743
JHI-Hv50k-2016-29663	1H	388523537	G	0.5283	0.53537	A	0.45849	0.46463	0.497498
JHI-Hv50k-2016-29690	1H	388750293	G	0.54717	0.55344	A	0.44151	0.44656	0.494288
SCRI_RS_207335	1H	388752036	T	0.50943	0.51527	C	0.47925	0.48473	0.499534
SCRI_RS_193401	1H	388753452	C	0.54717	0.55449	A	0.43962	0.44551	0.494062
JHI-Hv50k-2016-29735	1H	388836434	C	0.49623	0.50287	G	0.49057	0.49713	0.499984
JHI-Hv50k-2016-29753	1H	389037906	A	0.68491	0.69143	T	0.30566	0.30857	0.426709
SCRI_RS_100503	1H	389039712	T	0.68491	0.69143	C	0.30566	0.30857	0.426709
JHI-Hv50k-2016-29770	1H	389580302	T	0.56226	0.56762	C	0.4283	0.43238	0.490855
JHI-Hv50k-2016-29798	1H	390078780	G	0.54906	0.55114	A	0.44717	0.44886	0.494769
JHI-Hv50k-2016-29796	1H	390080528	C	0.56226	0.56654	T	0.43019	0.43346	0.491145
JHI-Hv50k-2016-29780	1H	390092006	A	0.54906	0.55114	G	0.44717	0.44886	0.494769
JHI-Hv50k-2016-29828	1H	390394724	A	0.53774	0.53977	T	0.45849	0.46023	0.496837
JHI-Hv50k-2016-29827	1H	390394778	G	0.54151	0.54563	A	0.45094	0.45437	0.495836
JHI-Hv50k-2016-29837	1H	390824070	A	0.54717	0.55028	G	0.44717	0.44972	0.494944
JHI-Hv50k-2016-29848	1H	391107724	A	0.53774	0.54493	G	0.44906	0.45507	0.495963
JHI-Hv50k-2016-29847	1H	391108055	G	0.54151	0.54459	T	0.45283	0.45541	0.496023
JHI-Hv50k-2016-29845	1H	391108187	C	0.54151	0.54667	T	0.44906	0.45333	0.495644
JHI-Hv50k-2016-29861	1H	391115281	A	0.53208	0.53612	G	0.46038	0.46388	0.497391
JHI-Hv50k-2016-29881	1H	391530558	G	0.53208	0.53409	C	0.46415	0.46591	0.497676
JHI-Hv50k-2016-29876	1H	391531413	G	0.53208	0.5351	A	0.46226	0.4649	0.497536
JHI-Hv50k-2016-29875	1H	391531598	G	0.53208	0.53409	A	0.46415	0.46591	0.497676
JHI-Hv50k-2016-29941	1H	391614938	C	0.92075	0.92424	G	0.07547	0.07576	0.140041
SCRI_RS_138118	1H	391615018	C	0.83962	0.84121	T	0.15849	0.15879	0.267151
SCRI_RS_201072	1H	391617140	C	0.53962	0.54064	G	0.45849	0.45936	0.496697
SCRI_RS_165072	1H	391618046	C	0.83774	0.84091	T	0.15849	0.15909	0.267561
JHI-Hv50k-2016-29988	1H	391792522	G	0.94906	0.95085	A	0.04906	0.04915	0.0934686
JHI-Hv50k-2016-29990	1H	391792795	T	0.92075	0.92424	G	0.07547	0.07576	0.140041
JHI-Hv50k-2016-30022	1H	391959680	A	0.53396	0.53598	T	0.46226	0.46402	0.497411
JHI-Hv50k-2016-30044	1H	392513254	T	0.84906	0.85066	C	0.14906	0.14934	0.254075
SCRI_RS_225107	1H	392514019	C	0.68679	0.69202	T	0.30566	0.30798	0.426257
JHI-Hv50k-2016-30068	1H	392629843	A	0.96981	0.97164	G	0.0283	0.02836	0.0551114
SCRI_RS_207081	1H	392655993	C	0.84906	0.85227	T	0.14717	0.14773	0.251812
JHI-Hv50k-2016-30102	1H	392657253	G	0.68868	0.69524	A	0.30189	0.30476	0.423763
SCRI_RS_145305	1H	392663685	A	0.61321	0.61787	C	0.37925	0.38213	0.472213
JHI-Hv50k-2016-30124	1H	392664081	A	0.49811	0.5019	G	0.49434	0.4981	0.499993
SCRI_RS_213455	1H	392861123	G	0.69057	0.69847	T	0.29811	0.30153	0.421219
JHI-Hv50k-2016-30148	1H	392936095	A	0.79434	0.80038	C	0.19811	0.19962	0.319544
JHI-Hv50k-2016-30141	1H	392936994	A	0.92075	0.9225	T	0.07736	0.0775	0.142988
JHI-Hv50k-2016-30181	1H	393103184	A	0.5	0.50189	G	0.49623	0.49811	0.499993
JHI-Hv50k-2016-30261	1H	394487551	C	0.91887	0.92586	T	0.07358	0.07414	0.137287
JHI-Hv50k-2016-30275	1H	394761896	C	0.53962	0.54064	G	0.45849	0.45936	0.496697
JHI-Hv50k-2016-30276	1H	394762077	G	0.53962	0.5458	C	0.44906	0.4542	0.495805
JHI-Hv50k-2016-30277	1H	394762082	G	0.6717	0.67681	C	0.32075	0.32319	0.437476
JHI-Hv50k-2016-30279	1H	394762261	G	0.66981	0.6749	A	0.32264	0.3251	0.43882
JHI-Hv50k-2016-30337	1H	395726270	A	0.67547	0.67932	C	0.31887	0.32068	0.435689
JHI-Hv50k-2016-30342	1H	395726710	G	0.67358	0.67742	A	0.32075	0.32258	0.437044
JHI-Hv50k-2016-30423	1H	395845065	G	0.67358	0.68	A	0.31698	0.32	0.4352
JHI-Hv50k-2016-30422	1H	395845254	T	0.66981	0.67748	C	0.31887	0.32252	0.437002
JHI-Hv50k-2016-30421	1H	395845293	A	0.67358	0.67742	G	0.32075	0.32258	0.437044
JHI-Hv50k-2016-30416	1H	395847577	C	0.54151	0.54253	G	0.4566	0.45747	0.496382
JHI-Hv50k-2016-30415	1H	395847603	C	0.54151	0.54253	G	0.4566	0.45747	0.496382
JHI-Hv50k-2016-30414	1H	395848229	T	0.67358	0.67742	G	0.32075	0.32258	0.437044
JHI-Hv50k-2016-30413	1H	395848588	G	0.74528	0.75095	A	0.24717	0.24905	0.374048
JHI-Hv50k-2016-30410	1H	395848960	A	0.92642	0.92817	G	0.0717	0.07183	0.133341
JHI-Hv50k-2016-30408	1H	395849008	A	0.92642	0.92817	C	0.0717	0.07183	0.133341
JHI-Hv50k-2016-30407	1H	395849131	A	0.74528	0.75095	G	0.24717	0.24905	0.374048
JHI-Hv50k-2016-30384	1H	395850826	C	0.67358	0.67742	T	0.32075	0.32258	0.437044
JHI-Hv50k-2016-30353	1H	395873777	G	0.92264	0.92614	A	0.07358	0.07386	0.136809
JHI-Hv50k-2016-30436	1H	395937750	G	0.9283	0.93182	C	0.06792	0.06818	0.127063
BOPA2_12_30115	1H	395944081	A	0.69623	0.70152	C	0.29623	0.29848	0.418779
JHI-Hv50k-2016-30491	1H	396217147	T	0.81132	0.81594	C	0.18302	0.18406	0.300364
JHI-Hv50k-2016-30480	1H	396219281	A	0.94151	0.94329	G	0.0566	0.05671	0.106988
JHI-Hv50k-2016-30479	1H	396219715	T	0.94151	0.94329	C	0.0566	0.05671	0.106988
JHI-Hv50k-2016-30466	1H	396242272	G	0.80943	0.8125	C	0.18679	0.1875	0.304688
JHI-Hv50k-2016-30729	1H	396362094	T	0.69434	0.69829	C	0.3	0.30171	0.421362
JHI-Hv50k-2016-30674	1H	396369794	G	0.63396	0.63757	T	0.36038	0.36243	0.462149
JHI-Hv50k-2016-30673	1H	396369873	C	0.63208	0.63688	T	0.36038	0.36312	0.462528
JHI-Hv50k-2016-30672	1H	396369931	A	0.6283	0.63429	C	0.36226	0.36571	0.463932
JHI-Hv50k-2016-30669	1H	396370043	G	0.63208	0.63688	A	0.36038	0.36312	0.462528
JHI-Hv50k-2016-30536	1H	396415942	T	0.63396	0.63757	G	0.36038	0.36243	0.462149
JHI-Hv50k-2016-30776	1H	396739500	A	0.8	0.80762	G	0.19057	0.19238	0.31074
BOPA1_3845-1089	1H	396741189	G	0.79623	0.80228	A	0.19623	0.19772	0.317254
JHI-Hv50k-2016-30793	1H	396864796	C	0.55472	0.55894	A	0.43774	0.44106	0.493052
JHI-Hv50k-2016-30821	1H	397036956	T	0.8	0.80608	C	0.19245	0.19392	0.31263
JHI-Hv50k-2016-30804	1H	397053331	T	0.79623	0.80381	C	0.19434	0.19619	0.315399
JHI-Hv50k-2016-30803	1H	397053566	T	0.5434	0.54649	C	0.45094	0.45351	0.495677
JHI-Hv50k-2016-30881	1H	397299660	G	0.80189	0.81107	T	0.18679	0.18893	0.306471
JHI-Hv50k-2016-30856	1H	397332447	T	0.65094	0.65465	C	0.3434	0.34535	0.452167
JHI-Hv50k-2016-30859	1H	397332767	C	0.55472	0.55894	T	0.43774	0.44106	0.493052
JHI-Hv50k-2016-30876	1H	397337646	C	0.59434	0.59772	T	0.4	0.40228	0.480902
JHI-Hv50k-2016-30877	1H	397337701	T	0.60566	0.61143	C	0.38491	0.38857	0.475167
JHI-Hv50k-2016-30878	1H	397337804	G	0.60189	0.60878	C	0.38679	0.39122	0.476334
JHI-Hv50k-2016-30879	1H	397338033	T	0.59434	0.60115	C	0.39434	0.39885	0.479537
SCRI_RS_122216	1H	397546834	A	0.78491	0.79389	G	0.20377	0.20611	0.327257
JHI-Hv50k-2016-30897	1H	397546922	A	0.78491	0.78937	G	0.20943	0.21063	0.33253
JHI-Hv50k-2016-30937	1H	397640721	A	0.51509	0.51705	G	0.48113	0.48295	0.499419
JHI-Hv50k-2016-30938	1H	397640868	T	0.51509	0.51705	C	0.48113	0.48295	0.499419
SCRI_RS_152795	1H	397644985	A	0.7	0.70398	G	0.29434	0.29602	0.416784
JHI-Hv50k-2016-31007	1H	397677271	G	0.82453	0.83238	A	0.16604	0.16762	0.279047
JHI-Hv50k-2016-31006	1H	397677331	A	0.7	0.70398	G	0.29434	0.29602	0.416784
JHI-Hv50k-2016-30997	1H	397680340	G	0.69434	0.70095	A	0.29623	0.29905	0.419238
JHI-Hv50k-2016-30991	1H	397682680	C	0.51509	0.51705	T	0.48113	0.48295	0.499419
JHI-Hv50k-2016-30987	1H	397685824	G	0.82453	0.82765	A	0.1717	0.17235	0.285291
JHI-Hv50k-2016-30978	1H	397687089	T	0.78113	0.78409	C	0.21509	0.21591	0.338586
JHI-Hv50k-2016-31018	1H	397790952	G	0.49623	0.50287	C	0.49057	0.49713	0.499984
JHI-Hv50k-2016-31053	1H	398697201	A	0.5434	0.54545	T	0.45283	0.45455	0.495869
JHI-Hv50k-2016-31062	1H	398710066	C	0.65849	0.66224	T	0.33585	0.33776	0.447356
JHI-Hv50k-2016-31063	1H	398710239	T	0.65094	0.65465	C	0.3434	0.34535	0.452167
JHI-Hv50k-2016-31075	1H	399001318	T	0.89811	0.89811	C	0.10189	0.10189	0.183017
JHI-Hv50k-2016-31090	1H	399192486	A	0.5	0.50095	C	0.49811	0.49905	0.499998
JHI-Hv50k-2016-31100	1H	399202610	G	0.66038	0.6654	A	0.33208	0.3346	0.445286
JHI-Hv50k-2016-31138	1H	399289889	T	0.62642	0.63238	C	0.36415	0.36762	0.464951
JHI-Hv50k-2016-31141	1H	399290248	C	0.62642	0.63118	T	0.36604	0.36882	0.465584
JHI-Hv50k-2016-31169	1H	399530702	G	0.62642	0.63359	A	0.36226	0.36641	0.464307
JHI-Hv50k-2016-31168	1H	399531071	T	0.63208	0.63688	C	0.36038	0.36312	0.462528
JHI-Hv50k-2016-31167	1H	399531590	A	0.63208	0.63688	G	0.36038	0.36312	0.462528
JHI-Hv50k-2016-31184	1H	399726465	C	0.62642	0.63118	G	0.36604	0.36882	0.465584
JHI-Hv50k-2016-31221	1H	400034686	T	0.62453	0.62928	C	0.36792	0.37072	0.466573
JHI-Hv50k-2016-31217	1H	400038953	C	0.62264	0.62857	T	0.36792	0.37143	0.46694
JHI-Hv50k-2016-31204	1H	400051088	T	0.71698	0.72106	C	0.27736	0.27894	0.402265
JHI-Hv50k-2016-31248	1H	400207055	C	0.59811	0.60381	T	0.39245	0.39619	0.478447
JHI-Hv50k-2016-31245	1H	400207128	C	0.66981	0.67362	T	0.32453	0.32638	0.439712
JHI-Hv50k-2016-31244	1H	400207196	G	0.66792	0.68605	T	0.30566	0.31395	0.430771
JHI-Hv50k-2016-31237	1H	400207359	T	0.52453	0.52652	A	0.4717	0.47348	0.498593
JHI-Hv50k-2016-31283	1H	400230165	A	0.71698	0.72106	C	0.27736	0.27894	0.402265
JHI-Hv50k-2016-31282	1H	400230350	C	0.66604	0.67238	T	0.32453	0.32762	0.44057
JHI-Hv50k-2016-31279	1H	400230424	G	0.71698	0.72243	A	0.27547	0.27757	0.40105
JHI-Hv50k-2016-31278	1H	400230531	G	0.60755	0.60755	T	0.39245	0.39245	0.476866
JHI-Hv50k-2016-31277	1H	400230635	C	0.60755	0.60755	T	0.39245	0.39245	0.476866
JHI-Hv50k-2016-31270	1H	400235447	C	0.60755	0.60755	T	0.39245	0.39245	0.476866
JHI-Hv50k-2016-31297	1H	400337706	A	0.71698	0.72106	G	0.27736	0.27894	0.402265
JHI-Hv50k-2016-31310	1H	400344681	T	0.71132	0.71947	C	0.27736	0.28053	0.403666
JHI-Hv50k-2016-31324	1H	400707739	T	0.70943	0.71619	C	0.28113	0.28381	0.406524
JHI-Hv50k-2016-31323	1H	400708105	G	0.51698	0.5229	C	0.4717	0.4771	0.498951
JHI-Hv50k-2016-31328	1H	400919833	C	0.71132	0.71537	T	0.28302	0.28463	0.407232
JHI-Hv50k-2016-31327	1H	400919950	T	0.71132	0.71673	C	0.28113	0.28327	0.406056
JHI-Hv50k-2016-31326	1H	400920892	C	0.87358	0.87358	T	0.12642	0.12642	0.220876
JHI-Hv50k-2016-31332	1H	401384409	T	0.71132	0.71673	A	0.28113	0.28327	0.406056
JHI-Hv50k-2016-31333	1H	401384928	A	0.51887	0.52182	T	0.47547	0.47818	0.499048
JHI-Hv50k-2016-31338	1H	401566539	A	0.67358	0.67871	G	0.31887	0.32129	0.436125
JHI-Hv50k-2016-31358	1H	402339644	A	0.60566	0.63189	C	0.35283	0.36811	0.46521
JHI-Hv50k-2016-31367	1H	402349737	G	0.71698	0.72106	A	0.27736	0.27894	0.402265
JHI-Hv50k-2016-31390	1H	402366238	A	0.58302	0.59082	G	0.40377	0.40918	0.483503
JHI-Hv50k-2016-31384	1H	402395910	G	0.66792	0.67686	A	0.31887	0.32314	0.437441
JHI-Hv50k-2016-31412	1H	402598047	C	0.60566	0.60681	T	0.39245	0.39319	0.477183
JHI-Hv50k-2016-31423	1H	402616246	T	0.60189	0.60417	C	0.39434	0.39583	0.478297
JHI-Hv50k-2016-31425	1H	402616384	C	0.60566	0.60566	T	0.39434	0.39434	0.477672
SCRI_RS_130666	1H	402620579	A	0.60566	0.61494	C	0.37925	0.38506	0.473578
JHI-Hv50k-2016-31495	1H	403658830	C	0.67547	0.67932	T	0.31887	0.32068	0.435689
JHI-Hv50k-2016-31529	1H	403839280	C	0.60377	0.60377	T	0.39623	0.39623	0.478464
JHI-Hv50k-2016-31535	1H	403842570	G	0.6717	0.67552	A	0.32264	0.32448	0.438385
SCRI_RS_236104	1H	403884206	A	0.60377	0.60491	G	0.39434	0.39509	0.477988
JHI-Hv50k-2016-31556	1H	403904927	T	0.42264	0.52214	A	0.38679	0.47786	0.49902
JHI-Hv50k-2016-31576	1H	403936768	G	0.60566	0.60566	C	0.39434	0.39434	0.477672
SCRI_RS_21483	1H	403937409	A	0.56981	0.57634	C	0.41887	0.42366	0.488344
JHI-Hv50k-2016-31595	1H	404008605	C	0.60566	0.60566	T	0.39434	0.39434	0.477672
JHI-Hv50k-2016-31591	1H	404009873	A	0.66226	0.66985	G	0.32642	0.33015	0.442302
JHI-Hv50k-2016-31584	1H	404011061	A	0.60189	0.60417	G	0.39434	0.39583	0.478297
SCRI_RS_182431	1H	404239797	A	0.60566	0.60566	G	0.39434	0.39434	0.477672
JHI-Hv50k-2016-31636	1H	404328877	C	0.67358	0.67871	A	0.31887	0.32129	0.436125
JHI-Hv50k-2016-31661	1H	404457635	C	0.60566	0.60681	A	0.39245	0.39319	0.477183
JHI-Hv50k-2016-31679	1H	404573420	A	0.60566	0.60566	G	0.39434	0.39434	0.477672
JHI-Hv50k-2016-31699	1H	404668653	G	0.52642	0.52841	A	0.46981	0.47159	0.498386
JHI-Hv50k-2016-31702	1H	404670115	T	0.6566	0.66034	C	0.33774	0.33966	0.448582
BOPA2_12_30753	1H	404730859	A	0.67547	0.68061	G	0.31698	0.31939	0.43476
JHI-Hv50k-2016-31785	1H	404859670	A	0.60189	0.60417	C	0.39434	0.39583	0.478297
JHI-Hv50k-2016-31771	1H	404883135	A	0.55849	0.56167	G	0.43585	0.43833	0.492394
JHI-Hv50k-2016-31822	1H	404886064	G	0.63962	0.64695	T	0.34906	0.35305	0.456811
JHI-Hv50k-2016-31814	1H	404886957	A	0.63585	0.64313	G	0.35283	0.35687	0.459028
JHI-Hv50k-2016-31813	1H	404887091	T	0.74151	0.74857	C	0.24906	0.25143	0.376426
JHI-Hv50k-2016-31811	1H	404887336	T	0.63962	0.64449	C	0.35283	0.35551	0.458245
JHI-Hv50k-2016-31809	1H	404887406	C	0.63774	0.64381	T	0.35283	0.35619	0.458637
JHI-Hv50k-2016-31808	1H	404887661	C	0.63962	0.64571	T	0.35094	0.35429	0.457537
JHI-Hv50k-2016-31807	1H	404888043	C	0.7434	0.74905	T	0.24906	0.25095	0.375948
JHI-Hv50k-2016-31804	1H	404888461	C	0.56415	0.56736	T	0.43019	0.43264	0.490925
JHI-Hv50k-2016-31803	1H	404888593	G	0.56415	0.56736	T	0.43019	0.43264	0.490925
JHI-Hv50k-2016-31802	1H	404888604	T	0.56038	0.56464	C	0.43208	0.43536	0.491643
JHI-Hv50k-2016-31801	1H	404888950	T	0.66415	0.66667	C	0.33208	0.33333	0.444442
JHI-Hv50k-2016-31799	1H	404888966	A	0.66415	0.66667	C	0.33208	0.33333	0.444442
JHI-Hv50k-2016-31832	1H	405079053	C	0.55283	0.55388	T	0.44528	0.44612	0.494194
JHI-Hv50k-2016-31835	1H	405079789	T	0.55283	0.55388	C	0.44528	0.44612	0.494194
BOPA2_12_10201	1H	405081425	C	0.70566	0.70833	A	0.29057	0.29167	0.413197
JHI-Hv50k-2016-31848	1H	405082999	G	0.81698	0.82476	T	0.17358	0.17524	0.289062
JHI-Hv50k-2016-31873	1H	405088329	C	0.51509	0.52199	G	0.4717	0.47801	0.499033
JHI-Hv50k-2016-31892	1H	405749433	A	0.56981	0.58414	G	0.40566	0.41586	0.485841
JHI-Hv50k-2016-31897	1H	405757167	T	0.59057	0.5928	C	0.40566	0.4072	0.482776
JHI-Hv50k-2016-31914	1H	405951518	C	0.59057	0.5928	T	0.40566	0.4072	0.482776
BOPA2_12_10105	1H	406340493	G	0.98302	0.98302	C	0.01698	0.01698	0.0333834
BOPA1_1190-86	1H	406397248	G	0.59811	0.60038	A	0.39811	0.39962	0.479848
JHI-Hv50k-2016-31948	1H	406717456	A	0.59811	0.60038	G	0.39811	0.39962	0.479848
JHI-Hv50k-2016-32022	1H	407513105	G	0.53962	0.54064	A	0.45849	0.45936	0.496697
JHI-Hv50k-2016-32036	1H	407665304	C	0.93019	0.93019	T	0.06981	0.06981	0.129873
JHI-Hv50k-2016-32030	1H	407666879	G	0.56038	0.56464	A	0.43208	0.43536	0.491643
JHI-Hv50k-2016-32095	1H	407936545	A	0.61698	0.62167	G	0.37547	0.37833	0.470393
JHI-Hv50k-2016-32128	1H	408422290	A	0.88491	0.88658	G	0.11321	0.11342	0.201112
JHI-Hv50k-2016-32129	1H	408422321	T	0.91509	0.91682	C	0.08302	0.08318	0.152522
JHI-Hv50k-2016-32132	1H	408422549	C	0.90943	0.9181	T	0.08113	0.0819	0.150385
JHI-Hv50k-2016-32133	1H	408422618	G	0.5283	0.5293	C	0.46981	0.4707	0.498283
JHI-Hv50k-2016-32138	1H	408424372	A	0.91132	0.91651	G	0.08302	0.08349	0.153039
JHI-Hv50k-2016-32146	1H	408575542	C	0.91698	0.91871	T	0.08113	0.08129	0.149364
JHI-Hv50k-2016-32148	1H	408576629	G	0.91698	0.91871	C	0.08113	0.08129	0.149364
JHI-Hv50k-2016-32151	1H	408577268	C	0.91698	0.91871	T	0.08113	0.08129	0.149364
JHI-Hv50k-2016-32152	1H	408577544	G	0.91698	0.91871	T	0.08113	0.08129	0.149364
JHI-Hv50k-2016-32153	1H	408577691	C	0.96792	0.97159	T	0.0283	0.02841	0.0552057
JHI-Hv50k-2016-32154	1H	408577746	T	0.91509	0.91856	G	0.08113	0.08144	0.149615
JHI-Hv50k-2016-32155	1H	408578298	G	0.91698	0.91871	A	0.08113	0.08129	0.149364
SCRI_RS_237999	1H	408698952	G	0.53208	0.5351	A	0.46226	0.4649	0.497536
JHI-Hv50k-2016-32248	1H	408716819	T	0.90943	0.91461	G	0.08491	0.08539	0.156197
JHI-Hv50k-2016-32222	1H	408729399	G	0.81509	0.81509	A	0.18491	0.18491	0.301437
JHI-Hv50k-2016-32221	1H	408729452	T	0.91321	0.91667	C	0.08302	0.08333	0.152772
JHI-Hv50k-2016-32220	1H	408729555	T	0.91321	0.91493	C	0.08491	0.08507	0.155666
JHI-Hv50k-2016-32385	1H	408937890	A	0.49623	0.50674	G	0.48302	0.49326	0.499909
JHI-Hv50k-2016-32383	1H	408938031	G	0.51321	0.51711	A	0.47925	0.48289	0.499414
JHI-Hv50k-2016-32372	1H	408956465	G	0.50377	0.50473	C	0.49434	0.49527	0.499955
JHI-Hv50k-2016-32394	1H	408980259	A	0.71321	0.71727	G	0.28113	0.28273	0.405587
JHI-Hv50k-2016-32395	1H	408980506	C	0.81132	0.81285	T	0.18679	0.18715	0.30425
[truncated: 38,344 more rows]
