# Supplementary material for: CGIAR Barley Breeding Toolbox: A diversity panel to facilitate breeding and genomic research in the developing world
Source: Front Plant Sci. 2022 Nov 14;13:1034322. doi: 10.3389/fpls.2022.1034322 (PMC9702823; doi:10.3389/fpls.2022.1034322)
Supplement: Supplementary file 5 [file Table_3.xlsx]

## Sheet: Supplementary Table S3
Supplementary Table S3. Characterization of major flowering loci based on associated markers (A) and their linkage disequilibrium matrix (B)
A
Gene	HvCEN	HvPPD-H1	HvVRN-H3	HvVRN-H1
Marker	BOPA2_12_30265	BK_14	BK_05	BK_17
Alleles	A/G	A/G	T/C	C/G
Chromosom	2H	2H	7H	5H
Position (Bb)	470037512	23721209	38306147	537279385
Minor Allele Frequency	0.29	0.38	0.36	0.44
PIC	0.42	0.47	0.46	0.49
B
FT_Gene	HvCEN	HvPPD-H1	HvVRN-H3	HvVRN-H1
HvCEN	1	0.037	0.191	0.028
HvPPD-H1	0.037	1	0.003	0.077
HvVRN-H3	0.191	0.003	1	0.001
HvVRN-H1	0.028	0.077	0.001	1
