# Supplementary material for: CGIAR Barley Breeding Toolbox: A diversity panel to facilitate breeding and genomic research in the developing world
Source: Front Plant Sci. 2022 Nov 14;13:1034322. doi: 10.3389/fpls.2022.1034322 (PMC9702823; doi:10.3389/fpls.2022.1034322)
Supplement: Supplementary file 6 [file Table_4.xlsx]

## Sheet: Supplementary Table S4
Supplementary Table 4: List of the 530 entries of the Global Barley Panel. The origin and their SNP score at 4 markers asscoaited with relevant phenology genes is shown. The phenology allelic combination (AC) of every line is included
Geno	HvVrn-H3	HvPpd-H1	HvVrn-H1	HvCEN	AC	Origin
marker	BK_05	BK_14	BK_17
G30	C	A	G	G	AC1	India
G85	C	A	G	G	AC1	Europe
G151	C	A	G	G	AC1	USA
G152	C	A	G	G	AC1	USA
G164	C	A	G	G	AC1	USA
G175	C	A	G	G	AC1	Europe
G177	C	A	G	G	AC1	Europe
G185	C	A	G	G	AC1	Europe
G186	C	A	G	G	AC1	Europe
G187	C	A	G	G	AC1	Europe
G188	C	A	G	G	AC1	Europe
G201	C	A	G	G	AC1	Europe
G208	C	A	G	G	AC1	Europe
G217	C	A	G	G	AC1	USA
G221	C	A	G	G	AC1	USA
G224	C	A	G	G	AC1	USA
G278	C	A	G	G	AC1	USA
G290	C	A	G	G	AC1	Latin-America
G335	C	A	G	G	AC1	ICARDA
G376	C	A	G	G	AC1	ICARDA
G389	C	A	G	G	AC1	USA
G01	T	G	C	A	AC10	Landrace
G05	T	G	C	A	AC10	ICARDA
G06	T	G	C	A	AC10	India
G08	T	G	C	A	AC10	India
G19	T	G	C	A	AC10	ICARDA
G25	T	G	C	A	AC10	India
G28	T	G	C	A	AC10	India
G31	T	G	C	A	AC10	India
G36	T	G	C	A	AC10	India
G55	T	G	C	A	AC10	Landrace
G56	T	G	C	A	AC10	Landrace
G84	T	G	C	A	AC10	ICARDA
G102	T	G	C	A	AC10	India
G103	T	G	C	A	AC10	India
G108	T	G	C	A	AC10	ICARDA
G109	T	G	C	A	AC10	ICARDA
G119	T	G	C	A	AC10	ICARDA
G120	T	G	C	A	AC10	ICARDA
G191	T	G	C	A	AC10	Europe
G242	T	G	C	A	AC10	ICARDA
G249	T	G	C	A	AC10	ICARDA
G268	T	G	C	A	AC10	ICARDA
G291	T	G	C	A	AC10	ICARDA
G294	T	G	C	A	AC10	ICARDA
G313	T	G	C	A	AC10	ICARDA
G315	T	G	C	A	AC10	ICARDA
G318	T	G	C	A	AC10	ICARDA
G359	T	G	C	A	AC10	India
G379	T	G	C	A	AC10	ICARDA
G390	T	G	C	A	AC10	ICARDA
G409	T	G	C	A	AC10	ICARDA
G428	T	G	C	A	AC10	India
G432	T	G	C	A	AC10	ICARDA
G434	T	G	C	A	AC10	ICARDA
G436	T	G	C	A	AC10	ICARDA
G438	T	G	C	A	AC10	ICARDA
G463	T	G	C	A	AC10	India
G470	T	G	C	A	AC10	ICARDA
G502	T	G	C	A	AC10	ICARDA
G508	T	G	C	A	AC10	ICARDA
G529	T	G	C	A	AC10	ICARDA
G54	T	G	C	G	AC11	ICARDA
G58	T	G	C	G	AC11	Landrace
G398	T	G	C	G	AC11	ICARDA
G416	T	G	C	G	AC11	ICARDA
G505	T	G	C	G	AC11	ICARDA
G526	T	G	C	G	AC11	ICARDA
G10	T	G	G	A	AC12	ICARDA
G11	T	G	G	A	AC12	ICARDA
G21	T	G	G	A	AC12	ICARDA
G23	T	G	G	A	AC12	India
G32	T	G	G	A	AC12	India
G34	T	G	G	A	AC12	India
G45	T	G	G	A	AC12	Africa
G48	T	G	G	A	AC12	Landrace
G49	T	G	G	A	AC12	Landrace
G57	T	G	G	A	AC12	Landrace
G82	T	G	G	A	AC12	India
G104	T	G	G	A	AC12	India
G114	T	G	G	A	AC12	ICARDA
G123	T	G	G	A	AC12	Africa
G124	T	G	G	A	AC12	Africa
G126	T	G	G	A	AC12	Africa
G131	T	G	G	A	AC12	Africa
G132	T	G	G	A	AC12	USA
G230	T	G	G	A	AC12	ICARDA
G248	T	G	G	A	AC12	ICARDA
G251	T	G	G	A	AC12	ICARDA
G252	T	G	G	A	AC12	ICARDA
G254	T	G	G	A	AC12	ICARDA
G255	T	G	G	A	AC12	ICARDA
G262	T	G	G	A	AC12	Australia
G280	T	G	G	A	AC12	ICARDA
G281	T	G	G	A	AC12	ICARDA
G283	T	G	G	A	AC12	ICARDA
G309	T	G	G	A	AC12	ICARDA
G310	T	G	G	A	AC12	ICARDA
G314	T	G	G	A	AC12	ICARDA
G316	T	G	G	A	AC12	ICARDA
G320	T	G	G	A	AC12	ICARDA
G321	T	G	G	A	AC12	ICARDA
G341	T	G	G	A	AC12	Australia
G347	T	G	G	A	AC12	Australia
G349	T	G	G	A	AC12	Australia
G351	T	G	G	A	AC12	Australia
G354	T	G	G	A	AC12	Australia
G355	T	G	G	A	AC12	Australia
G361	T	G	G	A	AC12	ICARDA
G396	T	G	G	A	AC12	ICARDA
G400	T	G	G	A	AC12	ICARDA
G403	T	G	G	A	AC12	ICARDA
G404	T	G	G	A	AC12	ICARDA
G405	T	G	G	A	AC12	ICARDA
G427	T	G	G	A	AC12	India
G430	T	G	G	A	AC12	ICARDA
G431	T	G	G	A	AC12	ICARDA
G448	T	G	G	A	AC12	ICARDA
G451	T	G	G	A	AC12	India
G452	T	G	G	A	AC12	India
G457	T	G	G	A	AC12	India
G459	T	G	G	A	AC12	India
G460	T	G	G	A	AC12	India
G464	T	G	G	A	AC12	India
G466	T	G	G	A	AC12	ICARDA
G475	T	G	G	A	AC12	ICARDA
G477	T	G	G	A	AC12	ICARDA
G479	T	G	G	A	AC12	ICARDA
G483	T	G	G	A	AC12	ICARDA
G485	T	G	G	A	AC12	ICARDA
G487	T	G	G	A	AC12	ICARDA
G490	T	G	G	A	AC12	ICARDA
G528	T	G	G	A	AC12	ICARDA
G50	T	G	G	G	AC13	Landrace
G134	T	G	G	G	AC13	ICARDA
G225	T	G	G	G	AC13	ICARDA
G468	T	G	G	G	AC13	ICARDA
G469	T	G	G	G	AC13	ICARDA
G473	T	G	G	G	AC13	ICARDA
G13	C	A	G	A	AC14	ICARDA
G22	C	A	G	A	AC14	ICARDA
G29	C	A	G	A	AC14	India
G79	C	A	G	A	AC14	USA
G339	C	A	G	A	AC14	Australia
G415	C	A	G	A	AC14	ICARDA
G444	C	A	G	A	AC14	ICARDA
G449	C	A	G	A	AC14	ICARDA
G480	C	A	G	A	AC14	ICARDA
G14	T	A	C	A	AC15	ICARDA
G15	T	A	C	A	AC15	ICARDA
G16	T	A	C	A	AC15	ICARDA
G26	T	A	C	A	AC15	India
G27	T	A	C	A	AC15	India
G35	T	A	C	A	AC15	India
G42	T	A	C	A	AC15	ICARDA
G43	T	A	C	A	AC15	India
G51	T	A	C	A	AC15	Landrace
G52	T	A	C	A	AC15	Landrace
G53	T	A	C	A	AC15	Landrace
G60	T	A	C	A	AC15	Canada
G63	T	A	C	A	AC15	ICARDA
G64	T	A	C	A	AC15	ICARDA
G67	T	A	C	A	AC15	ICARDA
G68	T	A	C	A	AC15	ICARDA
G69	T	A	C	A	AC15	Canada
G73	T	A	C	A	AC15	ICARDA
G75	T	A	C	A	AC15	Other
G77	T	A	C	A	AC15	ICARDA
G81	T	A	C	A	AC15	USA
G87	T	A	C	A	AC15	Other
G88	T	A	C	A	AC15	Other
G89	T	A	C	A	AC15	Landrace
G90	T	A	C	A	AC15	Landrace
G91	T	A	C	A	AC15	Landrace
G98	T	A	C	A	AC15	USA
G105	T	A	C	A	AC15	India
G111	T	A	C	A	AC15	ICARDA
G116	T	A	C	A	AC15	ICARDA
G128	T	A	C	A	AC15	Africa
G135	T	A	C	A	AC15	Other
G137	T	A	C	A	AC15	Other
G138	T	A	C	A	AC15	Other
G141	T	A	C	A	AC15	ICARDA
G142	T	A	C	A	AC15	ICARDA
G149	T	A	C	A	AC15	ICARDA
G158	T	A	C	A	AC15	ICARDA
G167	T	A	C	A	AC15	ICARDA
G182	T	A	C	A	AC15	ICARDA
G184	T	A	C	A	AC15	Europe
G190	T	A	C	A	AC15	ICARDA
G209	T	A	C	A	AC15	ICARDA
G227	T	A	C	A	AC15	ICARDA
G231	T	A	C	A	AC15	Other
G241	T	A	C	A	AC15	India
G244	T	A	C	A	AC15	ICARDA
G250	T	A	C	A	AC15	ICARDA
G259	T	A	C	A	AC15	Europe
G265	T	A	C	A	AC15	USA
G276	T	A	C	A	AC15	Landrace
G285	T	A	C	A	AC15	ICARDA
G293	T	A	C	A	AC15	ICARDA
G295	T	A	C	A	AC15	ICARDA
G296	T	A	C	A	AC15	ICARDA
G297	T	A	C	A	AC15	ICARDA
G298	T	A	C	A	AC15	ICARDA
G301	T	A	C	A	AC15	ICARDA
G303	T	A	C	A	AC15	ICARDA
G317	T	A	C	A	AC15	ICARDA
G323	T	A	C	A	AC15	ICARDA
G326	T	A	C	A	AC15	ICARDA
G327	T	A	C	A	AC15	ICARDA
G328	T	A	C	A	AC15	ICARDA
G329	T	A	C	A	AC15	ICARDA
G345	T	A	C	A	AC15	ICARDA
G358	T	A	C	A	AC15	India
G363	T	A	C	A	AC15	ICARDA
G370	T	A	C	A	AC15	ICARDA
G371	T	A	C	A	AC15	ICARDA
G374	T	A	C	A	AC15	ICARDA
G375	T	A	C	A	AC15	ICARDA
G380	T	A	C	A	AC15	ICARDA
G382	T	A	C	A	AC15	ICARDA
G383	T	A	C	A	AC15	ICARDA
G386	T	A	C	A	AC15	ICARDA
G393	T	A	C	A	AC15	ICARDA
G394	T	A	C	A	AC15	ICARDA
G395	T	A	C	A	AC15	ICARDA
G399	T	A	C	A	AC15	ICARDA
G402	T	A	C	A	AC15	ICARDA
G406	T	A	C	A	AC15	ICARDA
G407	T	A	C	A	AC15	ICARDA
G413	T	A	C	A	AC15	ICARDA
G419	T	A	C	A	AC15	ICARDA
G439	T	A	C	A	AC15	ICARDA
G440	T	A	C	A	AC15	ICARDA
G441	T	A	C	A	AC15	ICARDA
G443	T	A	C	A	AC15	ICARDA
G454	T	A	C	A	AC15	India
G458	T	A	C	A	AC15	India
G462	T	A	C	A	AC15	India
G465	T	A	C	A	AC15	India
G492	T	A	C	A	AC15	ICARDA
G493	T	A	C	A	AC15	ICARDA
G494	T	A	C	A	AC15	ICARDA
G495	T	A	C	A	AC15	ICARDA
G496	T	A	C	A	AC15	ICARDA
G498	T	A	C	A	AC15	ICARDA
G500	T	A	C	A	AC15	ICARDA
G501	T	A	C	A	AC15	ICARDA
G503	T	A	C	A	AC15	ICARDA
G506	T	A	C	A	AC15	ICARDA
G507	T	A	C	A	AC15	ICARDA
G511	T	A	C	A	AC15	ICARDA
G513	T	A	C	A	AC15	ICARDA
G516	T	A	C	A	AC15	ICARDA
G518	T	A	C	A	AC15	ICARDA
G530	T	A	C	A	AC15	ICARDA
G02	T	A	G	A	AC16	ICARDA
G03	T	A	G	A	AC16	ICARDA
G09	T	A	G	A	AC16	USA
G17	T	A	G	A	AC16	ICARDA
G37	T	A	G	A	AC16	ICARDA
G39	T	A	G	A	AC16	ICARDA
G44	T	A	G	A	AC16	ICARDA
G59	T	A	G	A	AC16	ICARDA
G62	T	A	G	A	AC16	ICARDA
G65	T	A	G	A	AC16	ICARDA
G66	T	A	G	A	AC16	ICARDA
G72	T	A	G	A	AC16	Canada
G76	T	A	G	A	AC16	USA
G78	T	A	G	A	AC16	Canada
G92	T	A	G	A	AC16	Landrace
G93	T	A	G	A	AC16	Other
G96	T	A	G	A	AC16	USA
G97	T	A	G	A	AC16	Europe
G121	T	A	G	A	AC16	ICARDA
G140	T	A	G	A	AC16	ICARDA
G198	T	A	G	A	AC16	ICARDA
G212	T	A	G	A	AC16	Canada
G213	T	A	G	A	AC16	USA
G214	T	A	G	A	AC16	USA
G215	T	A	G	A	AC16	USA
G216	T	A	G	A	AC16	USA
G226	T	A	G	A	AC16	ICARDA
G228	T	A	G	A	AC16	ICARDA
G258	T	A	G	A	AC16	Latin-America
G271	T	A	G	A	AC16	ICARDA
G284	T	A	G	A	AC16	ICARDA
G286	T	A	G	A	AC16	ICARDA
G287	T	A	G	A	AC16	ICARDA
G288	T	A	G	A	AC16	ICARDA
G289	T	A	G	A	AC16	ICARDA
G292	T	A	G	A	AC16	ICARDA
G307	T	A	G	A	AC16	ICARDA
G325	T	A	G	A	AC16	ICARDA
G330	T	A	G	A	AC16	ICARDA
G357	T	A	G	A	AC16	India
G381	T	A	G	A	AC16	ICARDA
G408	T	A	G	A	AC16	ICARDA
G410	T	A	G	A	AC16	ICARDA
G412	T	A	G	A	AC16	ICARDA
G426	T	A	G	A	AC16	ICARDA
G433	T	A	G	A	AC16	ICARDA
G442	T	A	G	A	AC16	ICARDA
G445	T	A	G	A	AC16	ICARDA
G446	T	A	G	A	AC16	ICARDA
G447	T	A	G	A	AC16	ICARDA
G455	T	A	G	A	AC16	India
G456	T	A	G	A	AC16	Canada
G486	T	A	G	A	AC16	ICARDA
G509	T	A	G	A	AC16	ICARDA
G512	T	A	G	A	AC16	ICARDA
G515	T	A	G	A	AC16	ICARDA
G517	T	A	G	A	AC16	ICARDA
G519	T	A	G	A	AC16	ICARDA
G520	T	A	G	A	AC16	ICARDA
G521	T	A	G	A	AC16	ICARDA
G522	T	A	G	A	AC16	ICARDA
G523	T	A	G	A	AC16	ICARDA
G524	T	A	G	A	AC16	ICARDA
G527	T	A	G	A	AC16	ICARDA
G71	C	A	C	G	AC2	Canada
G83	C	A	C	G	AC2	Europe
G129	C	A	C	G	AC2	Africa
G130	C	A	C	G	AC2	Africa
G133	C	A	C	G	AC2	Africa
G139	C	A	C	G	AC2	USA
G145	C	A	C	G	AC2	Other
G148	C	A	C	G	AC2	USA
G153	C	A	C	G	AC2	USA
G154	C	A	C	G	AC2	USA
G157	C	A	C	G	AC2	USA
G162	C	A	C	G	AC2	USA
G165	C	A	C	G	AC2	USA
G171	C	A	C	G	AC2	USA
G172	C	A	C	G	AC2	USA
G173	C	A	C	G	AC2	USA
G174	C	A	C	G	AC2	USA
G176	C	A	C	G	AC2	Europe
G178	C	A	C	G	AC2	Europe
G179	C	A	C	G	AC2	Europe
G180	C	A	C	G	AC2	Europe
G181	C	A	C	G	AC2	Europe
G192	C	A	C	G	AC2	Other
G193	C	A	C	G	AC2	Other
G194	C	A	C	G	AC2	Europe
G196	C	A	C	G	AC2	Europe
G197	C	A	C	G	AC2	Europe
G202	C	A	C	G	AC2	Europe
G203	C	A	C	G	AC2	Europe
G204	C	A	C	G	AC2	Europe
G205	C	A	C	G	AC2	Europe
G206	C	A	C	G	AC2	Europe
G207	C	A	C	G	AC2	Europe
G211	C	A	C	G	AC2	Europe
G219	C	A	C	G	AC2	ICARDA
G237	C	A	C	G	AC2	Canada
G238	C	A	C	G	AC2	Canada
G239	C	A	C	G	AC2	Canada
G260	C	A	C	G	AC2	Europe
G263	C	A	C	G	AC2	Europe
G264	C	A	C	G	AC2	Canada
G274	C	A	C	G	AC2	Europe
G299	C	A	C	G	AC2	Latin-America
G302	C	A	C	G	AC2	ICARDA
G331	C	A	C	G	AC2	Australia
G332	C	A	C	G	AC2	Australia
G352	C	A	C	G	AC2	ICARDA
G353	C	A	C	G	AC2	Australia
G356	C	A	C	G	AC2	Europe
G364	C	A	C	G	AC2	USA
G367	C	A	C	G	AC2	USA
G368	C	A	C	G	AC2	USA
G372	C	A	C	G	AC2	Europe
G373	C	A	C	G	AC2	Europe
G384	C	A	C	G	AC2	Europe
G385	C	A	C	G	AC2	Europe
G387	C	A	C	G	AC2	Europe
G388	C	A	C	G	AC2	Europe
G429	C	A	C	G	AC2	Europe
G504	C	A	C	G	AC2	ICARDA
G95	T	A	G	G	AC3	Canada
G99	T	A	G	G	AC3	USA
G210	T	A	G	G	AC3	Europe
G220	T	A	G	G	AC3	USA
G234	T	A	G	G	AC3	USA
G235	T	A	G	G	AC3	USA
G236	T	A	G	G	AC3	USA
G240	T	A	G	G	AC3	Canada
G267	T	A	G	G	AC3	USA
G362	T	A	G	G	AC3	USA
G377	T	A	G	G	AC3	ICARDA
G450	T	A	G	G	AC3	ICARDA
G510	T	A	G	G	AC3	ICARDA
G147	C	G	G	G	AC4	USA
G166	C	G	G	G	AC4	USA
G170	C	G	G	G	AC4	USA
G253	C	G	G	G	AC4	Australia
G257	C	G	G	G	AC4	Other
G279	C	G	G	G	AC4	ICARDA
G344	C	G	G	G	AC4	ICARDA
G423	C	G	G	G	AC4	ICARDA
G472	C	G	G	G	AC4	ICARDA
G118	C	G	C	G	AC5	ICARDA
G143	C	G	C	G	AC5	ICARDA
G146	C	G	C	G	AC5	USA
G150	C	G	C	G	AC5	USA
G159	C	G	C	G	AC5	USA
G160	C	G	C	G	AC5	USA
G161	C	G	C	G	AC5	USA
G163	C	G	C	G	AC5	USA
G168	C	G	C	G	AC5	USA
G169	C	G	C	G	AC5	USA
G222	C	G	C	G	AC5	USA
G232	C	G	C	G	AC5	ICARDA
G256	C	G	C	G	AC5	Other
G392	C	G	C	G	AC5	ICARDA
G397	C	G	C	G	AC5	ICARDA
G467	C	G	C	G	AC5	ICARDA
G47	C	G	C	A	AC6	USA
G106	C	G	C	A	AC6	ICARDA
G113	C	G	C	A	AC6	ICARDA
G117	C	G	C	A	AC6	ICARDA
G245	C	G	C	A	AC6	ICARDA
G247	C	G	C	A	AC6	ICARDA
G275	C	G	C	A	AC6	USA
G305	C	G	C	A	AC6	ICARDA
G342	C	G	C	A	AC6	Australia
G420	C	G	C	A	AC6	ICARDA
G425	C	G	C	A	AC6	ICARDA
G437	C	G	C	A	AC6	ICARDA
G499	C	G	C	A	AC6	ICARDA
G07	T	A	C	G	AC7	Canada
G12	T	A	C	G	AC7	ICARDA
G33	T	A	C	G	AC7	Canada
G70	T	A	C	G	AC7	Canada
G80	T	A	C	G	AC7	ICARDA
G86	T	A	C	G	AC7	Canada
G94	T	A	C	G	AC7	Other
G195	T	A	C	G	AC7	Europe
G200	T	A	C	G	AC7	Europe
G218	T	A	C	G	AC7	USA
G223	T	A	C	G	AC7	Canada
G243	T	A	C	G	AC7	ICARDA
G266	T	A	C	G	AC7	USA
G270	T	A	C	G	AC7	ICARDA
G272	T	A	C	G	AC7	Europe
G273	T	A	C	G	AC7	Canada
G300	T	A	C	G	AC7	ICARDA
G350	T	A	C	G	AC7	Australia
G360	T	A	C	G	AC7	ICARDA
G366	T	A	C	G	AC7	ICARDA
G378	T	A	C	G	AC7	ICARDA
G20	C	A	C	A	AC8	ICARDA
G24	C	A	C	A	AC8	India
G61	C	A	C	A	AC8	Africa
G74	C	A	C	A	AC8	ICARDA
G101	C	A	C	A	AC8	Europe
G110	C	A	C	A	AC8	ICARDA
G112	C	A	C	A	AC8	ICARDA
G136	C	A	C	A	AC8	USA
G155	C	A	C	A	AC8	Latin-America
G156	C	A	C	A	AC8	USA
G183	C	A	C	A	AC8	Europe
G229	C	A	C	A	AC8	ICARDA
G233	C	A	C	A	AC8	ICARDA
G269	C	A	C	A	AC8	ICARDA
G333	C	A	C	A	AC8	Australia
G365	C	A	C	A	AC8	ICARDA
G391	C	A	C	A	AC8	ICARDA
G411	C	A	C	A	AC8	ICARDA
G435	C	A	C	A	AC8	ICARDA
G497	C	A	C	A	AC8	ICARDA
G525	C	A	C	A	AC8	ICARDA
G18	C	G	G	A	AC9	ICARDA
G38	C	G	G	A	AC9	ICARDA
G41	C	G	G	A	AC9	ICARDA
G46	C	G	G	A	AC9	Other
G100	C	G	G	A	AC9	USA
G122	C	G	G	A	AC9	Africa
G125	C	G	G	A	AC9	ICARDA
G127	C	G	G	A	AC9	Africa
G144	C	G	G	A	AC9	ICARDA
G246	C	G	G	A	AC9	ICARDA
G261	C	G	G	A	AC9	USA
G277	C	G	G	A	AC9	ICARDA
G282	C	G	G	A	AC9	ICARDA
G304	C	G	G	A	AC9	ICARDA
G306	C	G	G	A	AC9	ICARDA
G308	C	G	G	A	AC9	ICARDA
G311	C	G	G	A	AC9	ICARDA
G312	C	G	G	A	AC9	ICARDA
G334	C	G	G	A	AC9	Australia
G336	C	G	G	A	AC9	Australia
G337	C	G	G	A	AC9	Australia
G338	C	G	G	A	AC9	Australia
G340	C	G	G	A	AC9	Australia
G343	C	G	G	A	AC9	Australia
G346	C	G	G	A	AC9	Australia
G348	C	G	G	A	AC9	Australia
G401	C	G	G	A	AC9	ICARDA
G417	C	G	G	A	AC9	ICARDA
G418	C	G	G	A	AC9	ICARDA
G421	C	G	G	A	AC9	ICARDA
G422	C	G	G	A	AC9	ICARDA
G424	C	G	G	A	AC9	ICARDA
G461	C	G	G	A	AC9	Latin-America
G471	C	G	G	A	AC9	ICARDA
G478	C	G	G	A	AC9	ICARDA
G481	C	G	G	A	AC9	ICARDA
G482	C	G	G	A	AC9	ICARDA
G484	C	G	G	A	AC9	ICARDA
G488	C	G	G	A	AC9	ICARDA
G489	C	G	G	A	AC9	ICARDA
G491	C	G	G	A	AC9	ICARDA
G474	T	G		A	NA	ICARDA
G414	T	NA	C	A	NA	Other
G04	T	NA	C	G	NA	Landrace
G319	T	NA	G	A	NA	ICARDA
G453	T	NA	G	A	NA	India
G514	T	NA	NA	A	NA	ICARDA
G40	C	G	NA	A	NA	ICARDA
G322	A	C	A	NA	NA	ICARDA
G107	A	C	G	NA	NA	Latin-America
G189	A	C	G	NA	NA	Europe
G199	A	C	G	NA	NA	Europe
G115	G	G	A	NA	NA	ICARDA
G369	G	G	A	NA	NA	ICARDA
G476	T	A	G	NA	NA	ICARDA
G324	T	A	NA	A	NA	ICARDA
