# Supplementary material for: CGIAR Barley Breeding Toolbox: A diversity panel to facilitate breeding and genomic research in the developing world
Source: Front Plant Sci. 2022 Nov 14;13:1034322. doi: 10.3389/fpls.2022.1034322 (PMC9702823; doi:10.3389/fpls.2022.1034322)
Supplement: Supplementary file 7 [file Table_5.xlsx]

## Sheet: Supplementary Table S5
Supplementary Table 5: List of the 530 entries of the Global Barley Panel. The pedigree, row-type, origin and population belonging from 2 to 10 population is also shown. The phenology allelic combination of every line is included
Genotype	Genotype	Pedigree	Row Type	Origin	K=2	K=3	K=4	K=5	K=6	K=7	K=8	K=9	K=10	Allelic Combination
AM17_1	G01	CI7584	6	Landrace	SubPop1	Admixed	Admixed	Admixed	Admixed	Admixed	Admixed	Admixed	Admixed	AC10
AM17_108	G02	P.STO/3/LBIRAN/UNA80//LIGNEE640/4/BLLU/5/PETUNIA 1/6/M9846//CCXX14.ARZ3/PACO/3/PALTON	6	ICARDA	SubPop1	Admixed	SubPop4	SubPop2	SubPop6	SubPop5	SubPop2	SubPop5	SubPop7	AC16
AM17_110	G03	P.STO/3/LBIRAN/UNA80//LIGNEE640/4/BLLU/5/PETUNIA 1/6/ZIGZIG/4/EGYPT4/TERAN78//P.STO/3/QUINA	6	ICARDA	SubPop1	Admixed	Admixed	Admixed	Admixed	Admixed	Admixed	Admixed	SubPop9	AC16
AM17_117	G04	C-84	6	Landrace	SubPop2	Admixed	Admixed	Admixed	Admixed	Admixed	Admixed	Admixed	Admixed	NA
AM17_118	G05	Arta	6	ICARDA	SubPop1	SubPop1	Admixed	Admixed	SubPop3	SubPop1	SubPop7	SubPop1	SubPop8	AC10
AM17_119	G06	PL 172	6	India	SubPop1	SubPop1	Admixed	Admixed	SubPop3	SubPop1	SubPop7	SubPop1	SubPop8	AC10
AM17_12	G07	TR03189	2	Canada	SubPop2	SubPop2	Admixed	Admixed	Admixed	Admixed	Admixed	SubPop7	SubPop5	AC7
AM17_122	G08	RD2660	6	India	SubPop1	SubPop1	Admixed	Admixed	SubPop3	SubPop1	SubPop7	SubPop1	SubPop8	AC10
AM17_142	G09	6B10-4515	6	USA	SubPop1	SubPop1	SubPop4	SubPop2	SubPop3	Admixed	SubPop3	SubPop6	SubPop1	AC16
AM17_151	G10	MADRE SELVA/Keel	6	ICARDA	SubPop1	SubPop1	Admixed	Admixed	Admixed	Admixed	Admixed	Admixed	Admixed	AC12
AM17_152	G11	MADRE SELVA/Barque	6	ICARDA	SubPop1	SubPop1	Admixed	Admixed	Admixed	Admixed	Admixed	Admixed	Admixed	AC12
AM17_154	G12	Alanda-01/Petunia1	2	ICARDA	Admixed	Admixed	Admixed	Admixed	Admixed	Admixed	Admixed	Admixed	Admixed	AC7
AM17_156	G13	SEN	2	ICARDA	Admixed	Admixed	Admixed	Admixed	Admixed	Admixed	Admixed	Admixed	Admixed	AC14
AM17_161	G14	PENCO/CHEVRON-BAR//BREA/DL70	6	ICARDA	SubPop1	Admixed	Admixed	SubPop2	SubPop6	SubPop5	SubPop2	SubPop5	Admixed	AC15
AM17_164	G15	BREA/DL70//3*TOCTE/3/6B89.2027/CHAMICO	6	ICARDA	SubPop1	SubPop1	SubPop4	SubPop2	Admixed	Admixed	SubPop3	SubPop6	SubPop1	AC15
AM17_166	G16	LEGACY/CHAMICO//TRADITION	6	ICARDA	SubPop1	SubPop1	SubPop4	SubPop2	Admixed	Admixed	Admixed	Admixed	Admixed	AC15
AM17_167	G17	LEGACY/4/TOCTE//GOB/HUMAI10/3/ATAH92/ALELI/5/LEGACY/CHAMICO	6	ICARDA	SubPop1	SubPop1	SubPop4	SubPop2	Admixed	Admixed	Admixed	Admixed	Admixed	AC16
AM17_17	G18	WI3167/6/ANCA/2469//TOJI/3/SHYRI/4/ATACO/5/ALELI/7/Arar/Lignee527//Zy/DL69	2	ICARDA	Admixed	Admixed	Admixed	Admixed	Admixed	Admixed	Admixed	Admixed	Admixed	AC9
AM17_172	G19	BREA/DL70/M97.106	6	ICARDA	SubPop1	Admixed	Admixed	Admixed	Admixed	Admixed	Admixed	Admixed	Admixed	AC10
AM17_175	G20	BISON 217/3/SVANHALS-BAR/MSEL//AZAF/GOB24DH	2	ICARDA	SubPop1	Admixed	Admixed	Admixed	Admixed	Admixed	Admixed	Admixed	Admixed	AC8
AM17_18	G21	Alanda/5/Aths/4/Pro/TolI//Cer12/TolI/3/5106/6/Aths/7/Giza129	6	ICARDA	SubPop1	SubPop1	Admixed	Admixed	Admixed	Admixed	Admixed	Admixed	Admixed	AC12
AM17_187	G22	STAB33/PASION	2	ICARDA	Admixed	Admixed	Admixed	Admixed	Admixed	Admixed	Admixed	Admixed	Admixed	AC14
AM17_188	G23	RD 2794	6	India	SubPop1	SubPop1	SubPop4	Admixed	SubPop3	SubPop1	SubPop7	SubPop1	SubPop8	AC12
AM17_191	G24	HBL 316	6	India	SubPop1	Admixed	Admixed	Admixed	Admixed	Admixed	Admixed	Admixed	Admixed	AC8
AM17_192	G25	K 409	6	India	SubPop1	SubPop1	Admixed	Admixed	SubPop3	SubPop1	SubPop7	SubPop1	SubPop8	AC10
AM17_195	G26	BHS 380	6	India	SubPop1	Admixed	Admixed	Admixed	Admixed	Admixed	Admixed	Admixed	SubPop9	AC15
AM17_198	G27	VLB 1	6	India	SubPop1	SubPop1	Admixed	Admixed	SubPop3	SubPop1	Admixed	Admixed	Admixed	AC15
AM17_199	G28	RD 2786	6	India	SubPop1	SubPop1	SubPop4	Admixed	SubPop3	SubPop1	SubPop7	SubPop1	SubPop8	AC10
AM17_201	G29	VLB 118	6	India	SubPop1	Admixed	Admixed	Admixed	Admixed	Admixed	Admixed	Admixed	Admixed	AC14
AM17_204	G30	HBL 113	2	India	SubPop2	SubPop2	SubPop2	SubPop5	SubPop5	Admixed	Admixed	Admixed	Admixed	AC1
AM17_206	G31	PL 751	6	India	SubPop1	Admixed	Admixed	Admixed	SubPop3	SubPop1	SubPop7	SubPop1	SubPop8	AC10
AM17_208	G32	K 603	6	India	SubPop1	SubPop1	Admixed	Admixed	SubPop3	SubPop1	SubPop7	SubPop1	SubPop8	AC12
AM17_21	G33	TR250	2	Canada	SubPop2	SubPop2	Admixed	Admixed	Admixed	Admixed	Admixed	SubPop7	SubPop5	AC7
AM17_212	G34	SONU	6	India	SubPop1	SubPop1	Admixed	Admixed	Admixed	Admixed	Admixed	Admixed	Admixed	AC12
AM17_213	G35	NB 1	6	India	SubPop1	Admixed	Admixed	Admixed	Admixed	Admixed	Admixed	Admixed	Admixed	AC15
AM17_215	G36	BHS 400 (BCU-8019)	6	India	SubPop1	Admixed	Admixed	Admixed	Admixed	Admixed	Admixed	Admixed	Admixed	AC10
AM17_224	G37	ASSI	6	ICARDA	SubPop1	Admixed	Admixed	SubPop2	SubPop6	SubPop5	SubPop2	SubPop5	Admixed	AC16
AM17_225	G38	CANELA/BICHY2000	6	ICARDA	SubPop1	SubPop1	Admixed	Admixed	Admixed	Admixed	Admixed	Admixed	Admixed	AC9
AM17_226	G39	IQBA07-22	6	ICARDA	SubPop1	SubPop1	Admixed	Admixed	Admixed	Admixed	Admixed	Admixed	Admixed	AC16
AM17_231	G40	Zanbaka/5/Pyo/Cam//Avt/RM1508/3/Pon/4/Mona/Ben//Cam/6/Mundah	2	ICARDA	Admixed	Admixed	Admixed	Admixed	Admixed	Admixed	Admixed	Admixed	Admixed	NA
AM17_232	G41	Carina/Moroc9-75//WI3257	2	ICARDA	SubPop2	SubPop2	Admixed	Admixed	Admixed	Admixed	Admixed	Admixed	Admixed	AC9
AM17_234	G42	6B89.2027/CHAMICO//TRADITION	6	ICARDA	SubPop1	Admixed	SubPop4	SubPop2	Admixed	Admixed	Admixed	Admixed	Admixed	AC15
AM17_24	G43	LAKHAN (K226)	6	India	SubPop1	SubPop1	Admixed	Admixed	SubPop3	SubPop1	SubPop7	SubPop1	SubPop8	AC15
AM17_25	G44	WI3180/4/ALISO/CI3909.2//HB602/3/MOLA/SHYRI//ARUPO*2/JET	6	ICARDA	Admixed	Admixed	Admixed	Admixed	Admixed	Admixed	Admixed	Admixed	Admixed	AC16
AM17_26	G45	Barjouj	6	Africa	SubPop1	SubPop1	Admixed	Admixed	Admixed	Admixed	Admixed	Admixed	Admixed	AC12
AM17_28	G46	Haruna Nijo	6	Other	SubPop1	SubPop1	Admixed	Admixed	Admixed	Admixed	Admixed	Admixed	Admixed	AC9
AM17_280	G47	15UCM 92	2	USA	Admixed	Admixed	Admixed	Admixed	Admixed	Admixed	Admixed	Admixed	Admixed	AC6
AM17_284	G48	IG 144015	6	Landrace	SubPop1	SubPop1	Admixed	Admixed	Admixed	Admixed	Admixed	Admixed	Admixed	AC12
AM17_285	G49	IG 144107	6	Landrace	SubPop1	SubPop1	Admixed	Admixed	Admixed	Admixed	Admixed	Admixed	Admixed	AC12
AM17_286	G50	IG 144146	6	Landrace	Admixed	Admixed	Admixed	Admixed	Admixed	Admixed	Admixed	Admixed	Admixed	AC13
AM17_287	G51	IG 144149	6	Landrace	SubPop1	Admixed	Admixed	Admixed	Admixed	Admixed	Admixed	Admixed	Admixed	AC15
AM17_288	G52	IG 143951	6	Landrace	SubPop1	Admixed	Admixed	Admixed	Admixed	Admixed	Admixed	Admixed	Admixed	AC15
AM17_289	G53	IG 144146	6	Landrace	SubPop1	Admixed	Admixed	Admixed	Admixed	Admixed	Admixed	Admixed	Admixed	AC15
AM17_290	G54	Mari/aths*2	6	ICARDA	SubPop1	SubPop1	Admixed	Admixed	Admixed	Admixed	Admixed	Admixed	Admixed	AC11
AM17_291	G55	IG 26731	6	Landrace	SubPop1	Admixed	Admixed	Admixed	Admixed	SubPop1	SubPop7	SubPop1	Admixed	AC10
AM17_292	G56	IG 26051	6	Landrace	SubPop1	Admixed	Admixed	Admixed	Admixed	Admixed	SubPop7	SubPop1	Admixed	AC10
AM17_293	G57	IG 24770	6	Landrace	SubPop1	SubPop1	Admixed	Admixed	Admixed	Admixed	Admixed	Admixed	Admixed	AC12
AM17_295	G58	IG 24414	6	Landrace	SubPop1	SubPop1	Admixed	Admixed	Admixed	Admixed	Admixed	Admixed	Admixed	AC11
AM17_3	G59	Coss/OWB71080-44-1H//Viringa'S'/3/WI3180	2	ICARDA	Admixed	Admixed	Admixed	Admixed	Admixed	Admixed	Admixed	Admixed	Admixed	AC16
AM17_30	G60	H96117004	6	Canada	SubPop1	SubPop1	SubPop4	Admixed	Admixed	Admixed	Admixed	Admixed	Admixed	AC15
AM17_314	G61	Tichedrette	2	Africa	SubPop1	Admixed	Admixed	Admixed	Admixed	Admixed	Admixed	Admixed	Admixed	AC8
AM17_315	G62	CABUYA/MJA//PETUNIA1/5/PENCO/CHEVRON-BAR/3/ATACO/BERMEJO//HIGO/4/PETUNIA1	6	ICARDA	SubPop1	SubPop1	Admixed	Admixed	Admixed	Admixed	Admixed	Admixed	Admixed	AC16
AM17_317	G63	Petunia1	6	ICARDA	SubPop1	Admixed	SubPop4	SubPop2	SubPop6	SubPop5	SubPop2	SubPop5	Admixed	AC15
AM17_318	G64	Atahualpa	2	ICARDA	SubPop1	Admixed	Admixed	Admixed	Admixed	Admixed	Admixed	Admixed	Admixed	AC15
AM17_33	G65	CPOLO 9109/PETUNIA 2 M00053001 08/1G0035	6	ICARDA	SubPop1	Admixed	Admixed	Admixed	Admixed	Admixed	Admixed	Admixed	Admixed	AC16
AM17_34	G66	VMorales/6/ZIGZIG/4/EGYPT4/TERAN78//P.STO/3/QUINA CBSS04B00042S-0M-0Y-0M-0Y-1M-0AP	6	ICARDA	SubPop1	Admixed	Admixed	Admixed	Admixed	Admixed	Admixed	Admixed	SubPop9	AC16
AM17_36	G67	BBSC/CONGONA//FRESA CBSS05Y00126S-20Y-0M-0Y-0M-2AP	6	ICARDA	SubPop1	Admixed	Admixed	Admixed	Admixed	Admixed	Admixed	Admixed	Admixed	AC15
AM17_38	G68	MSEL/LOGAN-BAR CBSS03B00016S-0M-0Y-0M-0Y-1M-0Y	2	ICARDA	Admixed	Admixed	Admixed	Admixed	Admixed	Admixed	Admixed	Admixed	Admixed	AC15
AM17_40	G69	Chigwell	6	Canada	SubPop1	SubPop1	SubPop4	Admixed	Admixed	Admixed	Admixed	Admixed	Admixed	AC15
AM17_41	G70	Busby	2	Canada	SubPop2	SubPop2	Admixed	Admixed	Admixed	Admixed	Admixed	SubPop7	SubPop5	AC7
AM17_43	G71	Xena	2	Canada	SubPop2	SubPop2	SubPop2	SubPop5	SubPop5	Admixed	Admixed	Admixed	Admixed	AC2
AM17_44	G72	Celebration	6	Canada	SubPop1	SubPop1	SubPop4	SubPop2	SubPop3	Admixed	SubPop3	SubPop6	SubPop1	AC16
AM17_47	G73	CIRU/ZIGZIG	6	ICARDA	SubPop1	Admixed	Admixed	Admixed	Admixed	Admixed	Admixed	Admixed	SubPop9	AC15
AM17_5	G74	ICARDA SN326	6	ICARDA	SubPop1	Admixed	Admixed	Admixed	Admixed	Admixed	Admixed	Admixed	Admixed	AC8
AM17_51	G75	HB511/JAEGER H00056005 09/3H0078	6	Other	SubPop1	SubPop1	Admixed	Admixed	Admixed	Admixed	Admixed	Admixed	Admixed	AC15
AM17_52	G76	LACEY	6	USA	SubPop1	SubPop1	SubPop4	SubPop2	SubPop3	Admixed	SubPop3	SubPop6	SubPop1	AC16
AM17_53	G77	P.STO/3/LBIRAN/UNA80//LIGNEE640/4/BLLU/5/PETUNIA 1/6/CHAMICO/TOCTE//CONGONA	6	ICARDA	SubPop1	Admixed	Admixed	SubPop2	SubPop6	SubPop5	SubPop2	SubPop5	Admixed	AC15
AM17_54	G78	Legacy	6	Canada	SubPop1	SubPop1	SubPop4	SubPop2	SubPop3	Admixed	SubPop3	SubPop6	SubPop1	AC16
AM17_57	G79	ICARO	2	USA	Admixed	Admixed	Admixed	Admixed	Admixed	Admixed	Admixed	Admixed	Admixed	AC14
AM17_62	G80	ALELI/SCARLETT CBSS05M00148S-2M-0Y-0M-0AP-0TR	2	ICARDA	Admixed	Admixed	Admixed	Admixed	Admixed	Admixed	Admixed	Admixed	Admixed	AC7
AM17_65	G81	SUMBARD400	6	USA	SubPop1	SubPop1	SubPop4	Admixed	Admixed	Admixed	Admixed	Admixed	Admixed	AC15
AM17_67	G82	DWR28	2	India	Admixed	Admixed	Admixed	Admixed	Admixed	SubPop1	Admixed	Admixed	Admixed	AC12
AM17_69	G83	FIRAT	2	Europe	SubPop2	SubPop2	SubPop2	SubPop5	SubPop5	SubPop6	SubPop6	Admixed	Admixed	AC2
AM17_71	G84	CABUYA/MJA//PETUNIA 1/5/PENCO/CHEVRON-BAR/3/ATACO/ BERMEJO//HIGO/4/PETUNIA 1	6	ICARDA	SubPop1	Admixed	Admixed	SubPop2	Admixed	Admixed	SubPop2	SubPop5	Admixed	AC10
AM17_82	G85	Flagon	2	Europe	SubPop2	SubPop2	SubPop2	SubPop5	SubPop5	SubPop6	SubPop6	SubPop3	SubPop3	AC1
CB20_MAR_10	G86	Bentley	2	Canada	SubPop2	SubPop2	Admixed	Admixed	Admixed	Admixed	Admixed	SubPop7	SubPop5	AC7
CB20_MAR_100	G87	Hooded 1	6	Other	SubPop1	Admixed	Admixed	Admixed	Admixed	Admixed	Admixed	Admixed	Admixed	AC15
CB20_MAR_101	G88	Hooded 2	6	Other	SubPop1	Admixed	Admixed	Admixed	Admixed	Admixed	Admixed	Admixed	Admixed	AC15
CB20_MAR_102	G89	Hooded 3	6	Landrace	SubPop1	Admixed	SubPop4	SubPop2	Admixed	Admixed	Admixed	Admixed	Admixed	AC15
CB20_MAR_103	G90	Hooded 4	6	Landrace	SubPop1	Admixed	Admixed	Admixed	Admixed	Admixed	Admixed	Admixed	Admixed	AC15
CB20_MAR_104	G91	Hooded 5	6	Landrace	SubPop1	Admixed	Admixed	SubPop2	Admixed	Admixed	Admixed	Admixed	SubPop9	AC15
CB20_MAR_105	G92	Hooded 6	6	Landrace	SubPop1	Admixed	SubPop4	Admixed	Admixed	Admixed	Admixed	Admixed	Admixed	AC16
CB20_MAR_106	G93	Hooded 7	6	Other	SubPop1	Admixed	Admixed	Admixed	Admixed	Admixed	Admixed	Admixed	Admixed	AC16
CB20_MAR_107	G94	Hooded 8	6	Other	SubPop1	Admixed	Admixed	Admixed	Admixed	Admixed	Admixed	Admixed	Admixed	AC7
CB20_MAR_109	G95	Harrington	2	Canada	SubPop2	SubPop2	Admixed	Admixed	Admixed	Admixed	Admixed	SubPop7	SubPop5	AC3
CB20_MAR_11	G96	Stander	6	USA	SubPop1	SubPop1	Admixed	Admixed	Admixed	Admixed	SubPop3	SubPop6	SubPop1	AC16
CB20_MAR_110	G97	Piri	2	Europe	Admixed	Admixed	Admixed	Admixed	Admixed	Admixed	Admixed	Admixed	Admixed	AC16
CB20_MAR_111	G98	Minak	2	USA	Admixed	Admixed	Admixed	Admixed	Admixed	Admixed	Admixed	Admixed	Admixed	AC15
CB20_MAR_112	G99	Ymer	2	USA	SubPop2	SubPop2	SubPop2	SubPop5	Admixed	Admixed	Admixed	Admixed	Admixed	AC3
CB20_MAR_113	G100	Emir	6	USA	SubPop1	SubPop1	Admixed	Admixed	Admixed	Admixed	Admixed	Admixed	Admixed	AC9
CB20_MAR_114	G101	Kenia	2	Europe	SubPop1	Admixed	Admixed	Admixed	Admixed	Admixed	Admixed	Admixed	Admixed	AC8
CB20_MAR_115	G102	DWRB 101	2	India	SubPop1	Admixed	Admixed	Admixed	Admixed	Admixed	Admixed	Admixed	Admixed	AC10
CB20_MAR_116	G103	DWRB 123	2	India	SubPop1	Admixed	Admixed	Admixed	Admixed	Admixed	Admixed	Admixed	Admixed	AC10
CB20_MAR_117	G104	DWRB137	6	India	SubPop1	Admixed	Admixed	Admixed	Admixed	Admixed	Admixed	Admixed	Admixed	AC12
CB20_MAR_118	G105	DWRB 150	2	India	SubPop1	Admixed	Admixed	Admixed	Admixed	Admixed	Admixed	Admixed	Admixed	AC15
CB20_MAR_119	G106	AC-6629	6	ICARDA	SubPop1	SubPop1	Admixed	Admixed	Admixed	Admixed	Admixed	Admixed	Admixed	AC6
CB20_MAR_12	G107	San Cristobal	2	Latin-America	SubPop2	SubPop2	SubPop2	SubPop5	SubPop5	SubPop6	SubPop6	SubPop3	SubPop3	NA
CB20_MAR_120	G108	Alanda//Lignee527/Arar/3/BF891M-617	6	ICARDA	SubPop1	Admixed	Admixed	Admixed	Admixed	Admixed	Admixed	Admixed	Admixed	AC10
CB20_MAR_121	G109	Arbayan/NK1272/6/CI01021/4/CM67/U.Sask.1800//Pro/CM67/3/DL70/5/Nacha2	6	ICARDA	SubPop1	SubPop1	Admixed	Admixed	Admixed	Admixed	Admixed	Admixed	Admixed	AC10
CB20_MAR_122	G110	ATACO/COMINO//ALELI	6	ICARDA	SubPop1	Admixed	Admixed	Admixed	Admixed	Admixed	Admixed	Admixed	Admixed	AC8
CB20_MAR_123	G111	BBSC/CONGONA	6	ICARDA	SubPop1	Admixed	Admixed	Admixed	Admixed	Admixed	Admixed	Admixed	Admixed	AC15
CB20_MAR_124	G112	CWB117-9-7/3/Roho//Alger/Ceres362-1-1/4/Pamir-147/Sonata	2	ICARDA	Admixed	Admixed	Admixed	Admixed	Admixed	Admixed	Admixed	Admixed	Admixed	AC8
CB20_MAR_126	G113	Katara//SLB34-65/Arar	6	ICARDA	SubPop1	Admixed	Admixed	Admixed	Admixed	Admixed	Admixed	Admixed	Admixed	AC6
CB20_MAR_128	G114	Massine/BF891M-596	6	ICARDA	Admixed	Admixed	Admixed	Admixed	Admixed	Admixed	Admixed	Admixed	Admixed	AC12
CB20_MAR_129	G115	NT111//Sonata/Arta	2	ICARDA	Admixed	Admixed	Admixed	Admixed	Admixed	Admixed	Admixed	Admixed	Admixed	NA
CB20_MAR_130	G116	PETUNIA1/TITIRIBI	6	ICARDA	SubPop1	Admixed	Admixed	Admixed	SubPop6	Admixed	Admixed	Admixed	Admixed	AC15
CB20_MAR_131	G117	Tipper/Moroc9-75	2	ICARDA	Admixed	Admixed	Admixed	Admixed	Admixed	Admixed	Admixed	Admixed	Admixed	AC6
CB20_MAR_133	G118	WI2269/Espe/3/WI2291/Bgs//Hml-02	2	ICARDA	Admixed	Admixed	SubPop1	Admixed	SubPop2	SubPop4	SubPop4	SubPop2	SubPop6	AC5
CB20_MAR_134	G119	ZIGZIG/4/BBSC/CONGONA/3/ATACO/BERMEJO//HIGO	6	ICARDA	SubPop1	Admixed	Admixed	Admixed	Admixed	Admixed	Admixed	Admixed	Admixed	AC10
CB20_MAR_135	G120	RWA.M54/3/K-247/2401-13//Vavilon/4/Meteor	6	ICARDA	SubPop1	Admixed	Admixed	Admixed	Admixed	Admixed	Admixed	Admixed	Admixed	AC10
CB20_MAR_136	G121	U.Sask.1766/Api//Cel/3/Weeah/4/Giza121/Pue	6	ICARDA	SubPop1	Admixed	Admixed	Admixed	Admixed	Admixed	Admixed	Admixed	Admixed	AC16
CB20_MAR_137	G122	OUSSAMA	6	Africa	SubPop1	SubPop1	Admixed	SubPop3	SubPop4	SubPop7	SubPop5	SubPop9	Admixed	AC9
CB20_MAR_140	G123	TIDDAS	2	Africa	Admixed	Admixed	Admixed	Admixed	Admixed	Admixed	Admixed	Admixed	Admixed	AC12
CB20_MAR_142	G124	AMALOU	6	Africa	SubPop1	SubPop1	Admixed	Admixed	Admixed	Admixed	Admixed	Admixed	Admixed	AC12
CB20_MAR_143	G125	ACSAD68	6	ICARDA	SubPop1	SubPop1	Admixed	Admixed	Admixed	Admixed	Admixed	Admixed	Admixed	AC9
CB20_MAR_145	G126	TAFFA	6	Africa	Admixed	Admixed	Admixed	Admixed	Admixed	Admixed	Admixed	Admixed	Admixed	AC12
CB20_MAR_146	G127	ARIG 8	6	Africa	SubPop1	SubPop1	Admixed	Admixed	Admixed	Admixed	Admixed	Admixed	Admixed	AC9
CB20_MAR_147	G128	FIRDAWS	6	Africa	SubPop1	SubPop1	Admixed	Admixed	Admixed	Admixed	Admixed	Admixed	Admixed	AC15
CB20_MAR_148	G129	TISSA	2	Africa	SubPop2	SubPop2	SubPop2	SubPop5	Admixed	Admixed	Admixed	Admixed	Admixed	AC2
CB20_MAR_149	G130	TAMELLALT	2	Africa	SubPop2	SubPop2	Admixed	SubPop5	Admixed	Admixed	Admixed	Admixed	Admixed	AC2
CB20_MAR_151	G131	MASSINE	6	Africa	SubPop1	SubPop1	Admixed	Admixed	Admixed	Admixed	Admixed	Admixed	Admixed	AC12
CB20_MAR_152	G132	ACSAD 176	6	USA	SubPop1	SubPop1	Admixed	SubPop3	Admixed	Admixed	Admixed	Admixed	Admixed	AC12
CB20_MAR_153	G133	AZILAL	2	Africa	SubPop2	SubPop2	Admixed	Admixed	Admixed	Admixed	Admixed	Admixed	Admixed	AC2
CB20_MAR_155	G134	Furat-1	6	ICARDA	SubPop1	SubPop1	Admixed	SubPop3	Admixed	Admixed	Admixed	Admixed	Admixed	AC13
CB20_MAR_156	G135	YP 230	6	Other	SubPop1	Admixed	Admixed	Admixed	Admixed	Admixed	Admixed	Admixed	Admixed	AC15
CB20_MAR_157	G136	11MQ31	2	USA	SubPop1	SubPop3	SubPop3	Admixed	Admixed	Admixed	Admixed	Admixed	Admixed	AC8
CB20_MAR_158	G137	YP505	6	Other	SubPop1	Admixed	Admixed	Admixed	Admixed	Admixed	Admixed	Admixed	Admixed	AC15
CB20_MAR_159	G138	YP526	6	Other	SubPop1	Admixed	Admixed	Admixed	Admixed	Admixed	Admixed	Admixed	Admixed	AC15
CB20_MAR_16	G139	B081J	2	USA	SubPop2	SubPop2	Admixed	SubPop5	Admixed	Admixed	Admixed	Admixed	Admixed	AC2
CB20_MAR_160	G140	Alanda//Lignee527/Arar/3/Asal/4/AwBlack/Aths//Rhn-08/7/Man/4/Bal16/Pro//Apm/DwII-1Y/3/Api/CM67/5/Gas/OreS/6/Atahualpa	6	ICARDA	SubPop1	Admixed	Admixed	Admixed	Admixed	Admixed	Admixed	Admixed	Admixed	AC16
CB20_MAR_161	G141	PENCO/CHEVRON-BAR/3/LEGACY//PENCO/CHEVRON-BAR	6	ICARDA	SubPop1	Admixed	Admixed	SubPop2	Admixed	Admixed	Admixed	Admixed	Admixed	AC15
CB20_MAR_162	G142	PENCO/CHEVRON-BAR//FEG53.16/3/LEGACY//PENCO/CHEVRON-BAR	6	ICARDA	SubPop1	Admixed	Admixed	Admixed	Admixed	Admixed	Admixed	Admixed	Admixed	AC15
CB20_MAR_163	G143	BICHY2000/PRTL	2	ICARDA	Admixed	Admixed	Admixed	SubPop1	Admixed	SubPop2	SubPop1	SubPop4	SubPop10	AC5
CB20_MAR_164	G144	Clipper//WI2291*2/WI2269/7/Hml-02/5/Cq/Cm//Apm/3/12410/4/Giza134-2L/6/Clipper/Volla/3/Arr/Esp//Alger/Ceres362-1-1/4/Hml	2	ICARDA	Admixed	Admixed	SubPop1	Admixed	SubPop2	SubPop4	SubPop4	SubPop2	SubPop6	AC9
CB20_MAR_166	G145	Pol 3	2	Other	SubPop2	SubPop2	Admixed	SubPop5	Admixed	Admixed	Admixed	Admixed	Admixed	AC2
CB20_MAR_167	G146	15UCM 49	2	USA	SubPop2	Admixed	Admixed	SubPop1	Admixed	SubPop2	SubPop1	SubPop4	SubPop10	AC5
CB20_MAR_168	G147	15UCM 74	2	USA	Admixed	Admixed	Admixed	Admixed	Admixed	Admixed	Admixed	Admixed	Admixed	AC4
CB20_MAR_169	G148	15UCM 64	2	USA	Admixed	Admixed	Admixed	SubPop1	Admixed	SubPop2	SubPop1	SubPop4	SubPop10	AC2
CB20_MAR_17	G149	PENCO/CHEVRON-BAR	6	ICARDA	SubPop1	Admixed	Admixed	SubPop2	Admixed	Admixed	Admixed	Admixed	Admixed	AC15
CB20_MAR_171	G150	15UCM 53	2	USA	SubPop2	SubPop2	Admixed	SubPop1	Admixed	SubPop2	SubPop1	SubPop4	SubPop10	AC5
CB20_MAR_172	G151	15UCM 32	2	USA	Admixed	Admixed	Admixed	SubPop1	Admixed	SubPop2	SubPop1	SubPop4	SubPop10	AC1
CB20_MAR_173	G152	15UCM 87	2	USA	Admixed	Admixed	Admixed	SubPop1	Admixed	SubPop2	SubPop1	SubPop4	SubPop10	AC1
CB20_MAR_174	G153	15UCM 79	2	USA	SubPop2	SubPop2	Admixed	SubPop5	Admixed	Admixed	Admixed	Admixed	Admixed	AC2
CB20_MAR_175	G154	15UCM 59	2	USA	Admixed	Admixed	Admixed	SubPop1	Admixed	SubPop2	SubPop1	SubPop4	SubPop10	AC2
CB20_MAR_176	G155	Andreia	2	Latin-America	SubPop2	Admixed	Admixed	Admixed	Admixed	Admixed	Admixed	Admixed	Admixed	AC8
CB20_MAR_177	G156	15UCM 16	2	USA	SubPop2	Admixed	Admixed	Admixed	Admixed	Admixed	Admixed	Admixed	Admixed	AC8
CB20_MAR_179	G157	15UCM 102	2	USA	Admixed	Admixed	Admixed	SubPop1	Admixed	SubPop2	SubPop1	SubPop4	SubPop10	AC2
CB20_MAR_18	G158	PETUNIA 1	6	ICARDA	SubPop1	Admixed	SubPop4	SubPop2	SubPop6	SubPop5	SubPop2	SubPop5	Admixed	AC15
CB20_MAR_181	G159	15UCM 18	2	USA	Admixed	Admixed	Admixed	SubPop1	Admixed	SubPop2	SubPop1	SubPop4	SubPop10	AC5
CB20_MAR_182	G160	15UCM 20	2	USA	Admixed	Admixed	Admixed	SubPop1	Admixed	SubPop2	SubPop1	SubPop4	SubPop10	AC5
CB20_MAR_183	G161	15UCM 106	2	USA	Admixed	Admixed	Admixed	Admixed	Admixed	Admixed	Admixed	Admixed	Admixed	AC5
CB20_MAR_185	G162	15UCM 67	2	USA	Admixed	Admixed	Admixed	SubPop1	Admixed	SubPop2	SubPop1	SubPop4	SubPop10	AC2
CB20_MAR_186	G163	15UCM 92	2	USA	SubPop2	SubPop2	Admixed	SubPop1	Admixed	SubPop2	SubPop1	Admixed	Admixed	AC5
CB20_MAR_187	G164	15UCM 88	2	USA	Admixed	Admixed	Admixed	SubPop1	Admixed	SubPop2	SubPop1	SubPop4	SubPop10	AC1
CB20_MAR_188	G165	15UCM34	2	USA	Admixed	Admixed	Admixed	Admixed	Admixed	Admixed	Admixed	Admixed	Admixed	AC2
CB20_MAR_189	G166	15UCM 22	2	USA	Admixed	Admixed	Admixed	SubPop1	Admixed	SubPop2	SubPop1	SubPop4	SubPop10	AC4
CB20_MAR_19	G167	CIRUELO	6	ICARDA	SubPop1	Admixed	Admixed	Admixed	Admixed	Admixed	Admixed	Admixed	SubPop9	AC15
CB20_MAR_190	G168	15UCM 47	2	USA	SubPop2	SubPop2	SubPop2	SubPop1	Admixed	SubPop2	SubPop1	SubPop4	SubPop10	AC5
CB20_MAR_191	G169	15UCM9	2	USA	Admixed	Admixed	Admixed	SubPop1	Admixed	SubPop2	SubPop1	SubPop4	SubPop10	AC5
CB20_MAR_192	G170	15UCM23	2	USA	Admixed	Admixed	Admixed	Admixed	Admixed	Admixed	Admixed	Admixed	Admixed	AC4
CB20_MAR_193	G171	15UCM 72	2	USA	SubPop2	Admixed	Admixed	SubPop1	Admixed	SubPop2	SubPop1	SubPop4	SubPop10	AC2
CB20_MAR_197	G172	15UCM 52	2	USA	SubPop2	Admixed	Admixed	SubPop1	Admixed	SubPop2	SubPop1	SubPop4	SubPop10	AC2
CB20_MAR_198	G173	15UCM 17	2	USA	Admixed	Admixed	Admixed	SubPop1	Admixed	SubPop2	SubPop1	SubPop4	SubPop10	AC2
CB20_MAR_199	G174	15UCM 58	2	USA	SubPop2	SubPop2	SubPop2	SubPop1	Admixed	SubPop2	SubPop1	SubPop4	SubPop10	AC2
CB20_MAR_200	G175	Scarlett	2	Europe	SubPop2	SubPop2	SubPop2	SubPop5	SubPop5	SubPop6	SubPop6	Admixed	Admixed	AC1
CB20_MAR_201	G176	Pasadena	2	Europe	SubPop2	SubPop2	SubPop2	SubPop5	SubPop5	SubPop6	SubPop6	SubPop3	SubPop3	AC2
CB20_MAR_202	G177	Mauritia	2	Europe	SubPop2	SubPop2	SubPop2	SubPop5	SubPop5	SubPop6	SubPop6	SubPop3	SubPop3	AC1
CB20_MAR_203	G178	Philadelphia	2	Europe	SubPop2	SubPop2	SubPop2	SubPop5	SubPop5	SubPop6	SubPop6	SubPop3	SubPop3	AC2
CB20_MAR_204	G179	Bodega	2	Europe	SubPop2	SubPop2	SubPop2	SubPop5	SubPop5	SubPop6	SubPop6	SubPop3	SubPop3	AC2
CB20_MAR_207	G180	Aricada	2	Europe	SubPop2	SubPop2	SubPop2	SubPop5	SubPop5	SubPop6	SubPop6	SubPop3	SubPop3	AC2
CB20_MAR_208	G181	Victoriana	2	Europe	SubPop2	SubPop2	SubPop2	SubPop5	SubPop5	SubPop6	SubPop6	SubPop3	SubPop3	AC2
CB20_MAR_21	G182	MSEL/FNC1	2	ICARDA	Admixed	SubPop3	Admixed	Admixed	Admixed	Admixed	Admixed	Admixed	Admixed	AC15
CB20_MAR_210	G183	Suzuka	2	Europe	SubPop2	SubPop2	SubPop2	SubPop5	SubPop5	SubPop6	SubPop6	Admixed	Admixed	AC8
CB20_MAR_212	G184	Cocktail	6	Europe	SubPop1	Admixed	Admixed	Admixed	Admixed	Admixed	Admixed	Admixed	Admixed	AC15
CB20_MAR_214	G185	Orria	2	Europe	SubPop2	SubPop2	SubPop2	SubPop5	SubPop5	SubPop6	SubPop6	SubPop3	SubPop3	AC1
CB20_MAR_215	G186	Barabas	2	Europe	SubPop2	SubPop2	SubPop2	SubPop5	SubPop5	SubPop6	SubPop6	SubPop3	SubPop3	AC1
CB20_MAR_216	G187	Christina	2	Europe	SubPop2	SubPop2	SubPop2	SubPop5	SubPop5	SubPop6	SubPop6	Admixed	Admixed	AC1
CB20_MAR_218	G188	Nymfe	2	Europe	SubPop2	SubPop2	SubPop2	SubPop5	SubPop5	SubPop6	SubPop6	SubPop3	SubPop3	AC1
CB20_MAR_219	G189	Poet	2	Europe	SubPop2	SubPop2	SubPop2	SubPop5	SubPop5	SubPop6	SubPop6	SubPop3	SubPop3	NA
CB20_MAR_22	G190	ESMERALDA/LEGACY/6/P.STO/3/LBIRAN/UNA80//LIGNEE640/4/BLLU/5/PETUNIA 1	6	ICARDA	SubPop1	Admixed	SubPop4	SubPop2	Admixed	Admixed	Admixed	Admixed	Admixed	AC15
CB20_MAR_220	G191	Power	6	Europe	SubPop1	Admixed	Admixed	Admixed	Admixed	Admixed	Admixed	Admixed	Admixed	AC10
CB20_MAR_222	G192	SJ055066	2	Other	SubPop2	SubPop2	SubPop2	SubPop5	SubPop5	SubPop6	SubPop6	SubPop3	SubPop3	AC2
CB20_MAR_223	G193	SJ056089	2	Other	SubPop2	SubPop2	SubPop2	SubPop5	SubPop5	SubPop6	SubPop6	SubPop3	SubPop3	AC2
CB20_MAR_225	G194	CLASS	2	Europe	SubPop2	SubPop2	SubPop2	SubPop5	SubPop5	SubPop6	SubPop6	SubPop3	SubPop3	AC2
CB20_MAR_227	G195	KEOPS	2	Europe	SubPop2	SubPop2	SubPop2	SubPop5	SubPop5	SubPop6	SubPop6	SubPop3	SubPop3	AC7
CB20_MAR_228	G196	QUENCH	2	Europe	SubPop2	SubPop2	SubPop2	SubPop5	SubPop5	SubPop6	SubPop6	SubPop3	SubPop3	AC2
CB20_MAR_229	G197	HENLEY	2	Europe	SubPop2	SubPop2	SubPop2	SubPop5	SubPop5	SubPop6	SubPop6	SubPop3	SubPop3	AC2
CB20_MAR_23	G198	LOGAN-BAR/MSEL//AZAF	2	ICARDA	Admixed	Admixed	Admixed	Admixed	Admixed	Admixed	Admixed	Admixed	Admixed	AC16
CB20_MAR_230	G199	FAIRYTALE	2	Europe	SubPop2	SubPop2	SubPop2	SubPop5	SubPop5	SubPop6	SubPop6	SubPop3	SubPop3	NA
CB20_MAR_231	G200	UMBRELLA	2	Europe	SubPop2	SubPop2	SubPop2	SubPop5	SubPop5	SubPop6	SubPop6	SubPop3	SubPop3	AC7
CB20_MAR_232	G201	ANAKIN	2	Europe	SubPop2	SubPop2	SubPop2	SubPop5	SubPop5	SubPop6	SubPop6	SubPop3	SubPop3	AC1
CB20_MAR_233	G202	CHARMAY	2	Europe	SubPop2	SubPop2	SubPop2	SubPop5	SubPop5	SubPop6	SubPop6	SubPop3	SubPop3	AC2
CB20_MAR_234	G203	IRON	2	Europe	SubPop2	SubPop2	SubPop2	SubPop5	SubPop5	SubPop6	SubPop6	SubPop3	SubPop3	AC2
CB20_MAR_235	G204	JB FLAVOUR	2	Europe	SubPop2	SubPop2	SubPop2	SubPop5	SubPop5	SubPop6	SubPop6	SubPop3	SubPop3	AC2
CB20_MAR_236	G205	KONTIKI	2	Europe	SubPop2	SubPop2	SubPop2	SubPop5	SubPop5	SubPop6	SubPop6	SubPop3	SubPop3	AC2
CB20_MAR_237	G206	STINE	2	Europe	SubPop2	SubPop2	SubPop2	SubPop5	SubPop5	SubPop6	SubPop6	SubPop3	SubPop3	AC2
CB20_MAR_238	G207	CALCULE	2	Europe	SubPop2	SubPop2	SubPop2	SubPop5	SubPop5	SubPop6	SubPop6	SubPop3	SubPop3	AC2
CB20_MAR_239	G208	MAGALY	2	Europe	SubPop2	SubPop2	SubPop2	SubPop5	SubPop5	SubPop6	SubPop6	SubPop3	SubPop3	AC1
CB20_MAR_24	G209	MERIT,B/4/AZAF/3/ARUPO/K8755//MORA/5/MSEL	2	ICARDA	Admixed	Admixed	Admixed	Admixed	Admixed	Admixed	Admixed	Admixed	Admixed	AC15
CB20_MAR_240	G210	JB MALTASIA	2	Europe	SubPop2	SubPop2	SubPop2	SubPop5	SubPop5	SubPop6	SubPop6	SubPop3	SubPop3	AC3
CB20_MAR_242	G211	ESSENTIAL	2	Europe	SubPop2	SubPop2	SubPop2	SubPop5	SubPop5	SubPop6	SubPop6	SubPop3	SubPop3	AC2
CB20_MAR_243	G212	TRADITION	6	Canada	SubPop1	SubPop1	SubPop4	SubPop2	SubPop3	Admixed	SubPop3	SubPop6	SubPop1	AC16
CB20_MAR_244	G213	INNOVATION	6	USA	SubPop1	SubPop1	SubPop4	SubPop2	SubPop3	Admixed	SubPop3	SubPop6	SubPop1	AC16
CB20_MAR_245	G214	STELLAR ND	6	USA	SubPop1	SubPop1	SubPop4	SubPop2	SubPop3	SubPop1	SubPop3	SubPop6	SubPop1	AC16
CB20_MAR_246	G215	6B10-4804	6	USA	SubPop1	SubPop1	SubPop4	Admixed	Admixed	Admixed	SubPop3	SubPop6	SubPop1	AC16
CB20_MAR_247	G216	6B10-4905	6	USA	SubPop1	SubPop1	Admixed	Admixed	Admixed	Admixed	SubPop3	SubPop6	SubPop1	AC16
CB20_MAR_248	G217	2B10-4274	2	USA	SubPop2	SubPop2	SubPop2	Admixed	Admixed	Admixed	Admixed	SubPop7	SubPop5	AC1
CB20_MAR_249	G218	2B10-4162	2	USA	SubPop2	SubPop2	Admixed	Admixed	Admixed	Admixed	Admixed	Admixed	SubPop5	AC7
CB20_MAR_25	G219	ACUARIO T95/BCD12DH	2	ICARDA	SubPop2	SubPop2	Admixed	Admixed	Admixed	Admixed	Admixed	Admixed	Admixed	AC2
CB20_MAR_250	G220	2B10-4543	2	USA	SubPop2	SubPop2	SubPop2	Admixed	SubPop5	Admixed	Admixed	SubPop7	SubPop5	AC3
CB20_MAR_251	G221	2B09-3425	2	USA	SubPop2	SubPop2	Admixed	Admixed	Admixed	Admixed	Admixed	Admixed	Admixed	AC1
CB20_MAR_253	G222	ABI VOYAGER	2	USA	Admixed	Admixed	Admixed	Admixed	Admixed	Admixed	Admixed	Admixed	Admixed	AC5
CB20_MAR_254	G223	MERIT 57	2	Canada	SubPop2	SubPop2	SubPop2	SubPop5	SubPop5	Admixed	Admixed	SubPop7	SubPop5	AC7
CB20_MAR_255	G224	CONRAD	2	USA	SubPop2	SubPop2	SubPop2	Admixed	SubPop5	Admixed	Admixed	SubPop7	SubPop5	AC1
CB20_MAR_256	G225	MADRE SELVA/Malt 1	6	ICARDA	Admixed	Admixed	Admixed	Admixed	Admixed	Admixed	Admixed	Admixed	Admixed	AC13
CB20_MAR_257	G226	Harrington/Arta//Malt 1	6	ICARDA	SubPop1	SubPop1	SubPop4	SubPop2	Admixed	Admixed	Admixed	Admixed	Admixed	AC16
CB20_MAR_258	G227	CANELA/Malt 2	6	ICARDA	SubPop1	Admixed	Admixed	Admixed	Admixed	Admixed	Admixed	Admixed	Admixed	AC15
CB20_MAR_259	G228	MADRE SELVA/Malt 2	6	ICARDA	SubPop1	Admixed	SubPop4	SubPop2	SubPop6	SubPop5	SubPop2	SubPop5	Admixed	AC16
CB20_MAR_26	G229	MSEL//DEFRA/CL128	2	ICARDA	Admixed	Admixed	Admixed	Admixed	Admixed	Admixed	Admixed	Admixed	Admixed	AC8
CB20_MAR_260	G230	MEDUSA/DIAMANT-BAR//D1.72	6	ICARDA	SubPop1	Admixed	Admixed	Admixed	SubPop6	SubPop5	SubPop2	Admixed	SubPop7	AC12
CB20_MAR_262	G231	L-345	6	Other	SubPop1	Admixed	Admixed	Admixed	Admixed	Admixed	Admixed	Admixed	Admixed	AC15
CB20_MAR_271	G232	PETUNIA2/M111//QUINA/M112	2	ICARDA	Admixed	Admixed	SubPop1	Admixed	SubPop2	SubPop4	SubPop4	SubPop2	SubPop6	AC5
CB20_MAR_272	G233	CC33MS/5/NY65005-18/3/13929/NUM/ASSE/4/KBR	6	ICARDA	SubPop1	Admixed	Admixed	Admixed	Admixed	Admixed	Admixed	Admixed	Admixed	AC8
CB20_MAR_273	G234	2Ab09-X06F084-51	2	USA	SubPop2	SubPop2	Admixed	Admixed	Admixed	Admixed	Admixed	Admixed	Admixed	AC3
CB20_MAR_274	G235	Transit	2	USA	Admixed	Admixed	Admixed	Admixed	Admixed	Admixed	Admixed	Admixed	Admixed	AC3
CB20_MAR_275	G236	Julie	2	USA	Admixed	Admixed	Admixed	Admixed	Admixed	Admixed	Admixed	Admixed	Admixed	AC3
CB20_MAR_276	G237	CDC Fibar	2	Canada	SubPop2	SubPop2	Admixed	Admixed	Admixed	Admixed	Admixed	Admixed	Admixed	AC2
CB20_MAR_277	G238	CDC Candle	2	Canada	SubPop2	SubPop2	SubPop2	SubPop5	SubPop5	SubPop6	Admixed	SubPop7	SubPop5	AC2
CB20_MAR_278	G239	CDC Rattan	2	Canada	SubPop2	SubPop2	SubPop2	SubPop5	SubPop5	Admixed	Admixed	SubPop7	SubPop5	AC2
CB20_MAR_279	G240	CDC Alamo	2	Canada	SubPop2	SubPop2	Admixed	Admixed	Admixed	Admixed	Admixed	Admixed	Admixed	AC3
CB20_MAR_28	G241	RD2668	2	India	SubPop1	SubPop3	SubPop3	SubPop4	SubPop1	SubPop3	SubPop8	SubPop8	SubPop4	AC15
CB20_MAR_280	G242	WI3167/6/ANCA/2469//TOJI/3/SHYRI/4/ATACO/5/ALELI/7/Schooner/Babunj//Noor68/Kataf	2	ICARDA	Admixed	Admixed	Admixed	Admixed	Admixed	Admixed	Admixed	Admixed	Admixed	AC10
CB20_MAR_282	G243	DD-21/3/Harmal-02/ArabiAbiad//ER/Apm	2	ICARDA	Admixed	Admixed	Admixed	Admixed	Admixed	Admixed	Admixed	Admixed	Admixed	AC7
CB20_MAR_283	G244	DD-21/4/ALISO/CI3909.2//HB602/3/MOLA/SHYRI//ARUPO*2/JET	6	ICARDA	SubPop1	Admixed	Admixed	Admixed	Admixed	Admixed	Admixed	Admixed	Admixed	AC15
CB20_MAR_284	G245	Rt013/Nainaa/4/Lignee527/Chn-01//Gustoe/3/Atahualpa	2	ICARDA	Admixed	Admixed	Admixed	Admixed	Admixed	Admixed	Admixed	Admixed	Admixed	AC6
CB20_MAR_285	G246	Rhn-03//Lignee527/As45/4/Manitou/3/Arbayan-01//CI07117-9/DeirAlla106	6	ICARDA	SubPop1	SubPop1	Admixed	SubPop3	SubPop4	SubPop7	SubPop5	SubPop9	Admixed	AC9
CB20_MAR_286	G247	GK58/3/Kc/MullersHeydla//Sls/4/Wieselbuger//Ahor1303-61//Ste/Antares	2	ICARDA	Admixed	Admixed	Admixed	Admixed	Admixed	Admixed	Admixed	Admixed	Admixed	AC6
CB20_MAR_287	G248	Nadawa/Rhn-03//Saida	6	ICARDA	SubPop1	SubPop1	Admixed	SubPop3	Admixed	Admixed	SubPop5	Admixed	Admixed	AC12
CB20_MAR_288	G249	Moroc9-75//WI2291/WI2269	2	ICARDA	Admixed	SubPop3	Admixed	Admixed	Admixed	Admixed	Admixed	Admixed	Admixed	AC10
CB20_MAR_289	G250	BICHY2000/SHENMAINO.3	2	ICARDA	SubPop1	SubPop3	Admixed	Admixed	Admixed	Admixed	Admixed	Admixed	Admixed	AC15
CB20_MAR_291	G251	Demhay/4/Viringa'S'//WI2291/WI2269/3/Viringa'S'	2	ICARDA	SubPop1	SubPop1	Admixed	Admixed	Admixed	Admixed	Admixed	Admixed	Admixed	AC12
CB20_MAR_299	G252	Alanda/Zafraa//Gloria'S'/Copal'S'/3/F6NB_7	6	ICARDA	SubPop1	SubPop1	Admixed	Admixed	Admixed	Admixed	Admixed	Admixed	Admixed	AC12
CB20_MAR_3	G253	WI2291	2	Australia	SubPop2	SubPop2	Admixed	SubPop5	Admixed	Admixed	Admixed	Admixed	Admixed	AC4
CB20_MAR_300	G254	Clipper//WI2291*2/WI2269/5/Soufara-02/3/RM1508/Por//WI2269/4/Hml-02/ArabiAbiad//ER/Apm	2	ICARDA	SubPop2	Admixed	SubPop1	Admixed	SubPop2	SubPop4	SubPop4	SubPop2	SubPop6	AC12
CB20_MAR_301	G255	Soufara-02/3/RM1508/Por//WI2269/4/Hml-02/ArabiAbiad//ER/Apm/5/((GalleonxRichard)/5)xTilga	2	ICARDA	SubPop2	Admixed	SubPop1	Admixed	SubPop2	SubPop4	SubPop4	SubPop2	SubPop6	AC12
CB20_MAR_303	G256	C 8806	2	Other	SubPop2	SubPop2	SubPop2	SubPop5	SubPop5	Admixed	Admixed	Admixed	Admixed	AC5
CB20_MAR_304	G257	C9430	2	Other	SubPop2	SubPop2	Admixed	Admixed	Admixed	Admixed	Admixed	Admixed	Admixed	AC4
CB20_MAR_305	G258	CLE 202	2	Latin-America	SubPop2	Admixed	Admixed	Admixed	Admixed	Admixed	Admixed	SubPop7	SubPop5	AC16
CB20_MAR_306	G259	GoldMarker	6	Europe	SubPop1	Admixed	Admixed	Admixed	Admixed	Admixed	Admixed	Admixed	Admixed	AC15
CB20_MAR_307	G260	Isaria	2	Europe	SubPop2	SubPop2	SubPop2	SubPop5	SubPop5	SubPop6	SubPop6	Admixed	Admixed	AC2
CB20_MAR_308	G261	Piroline	2	USA	SubPop2	SubPop2	Admixed	Admixed	Admixed	Admixed	Admixed	Admixed	Admixed	AC9
CB20_MAR_309	G262	Stirling	6	Australia	SubPop2	Admixed	Admixed	Admixed	Admixed	Admixed	Admixed	Admixed	Admixed	AC12
CB20_MAR_31	G263	ATILIR	2	Europe	SubPop2	SubPop2	SubPop2	SubPop5	SubPop5	SubPop6	SubPop6	Admixed	Admixed	AC2
CB20_MAR_310	G264	SEEBE	2	Canada	SubPop2	Admixed	Admixed	Admixed	Admixed	Admixed	Admixed	Admixed	Admixed	AC2
CB20_MAR_311	G265	H01063002 09/2S0009	6	USA	SubPop1	SubPop1	Admixed	Admixed	Admixed	Admixed	Admixed	Admixed	Admixed	AC15
CB20_MAR_312	G266	J02006004 09/2T0095	2	USA	SubPop2	SubPop2	SubPop2	Admixed	Admixed	Admixed	Admixed	SubPop7	SubPop5	AC7
CB20_MAR_313	G267	J02077006 09/2T0166	2	USA	SubPop2	SubPop2	SubPop2	SubPop5	Admixed	Admixed	Admixed	Admixed	Admixed	AC3
CB20_MAR_314	G268	BREA/DL70//CABUYA/3/BREA/DL70//3*CABUYA	6	ICARDA	SubPop1	Admixed	Admixed	Admixed	Admixed	Admixed	Admixed	Admixed	Admixed	AC10
CB20_MAR_315	G269	BISON 218.1/6/P.STO/3/LBIRAN/UNA80//LIGNEE640/4/BLLU/5/PETUNIA 1	6	ICARDA	SubPop1	Admixed	Admixed	Admixed	Admixed	Admixed	Admixed	Admixed	Admixed	AC8
CB20_MAR_316	G270	CONDOR-BAR/3/PATTY.B/RUDA//ALELI/4/ALELI/5/DIAMALT	2	ICARDA	Admixed	Admixed	Admixed	Admixed	Admixed	Admixed	Admixed	Admixed	Admixed	AC7
CB20_MAR_317	G271	ZIGZIG/BLLU//PETUNIA 1	2	ICARDA	Admixed	Admixed	Admixed	Admixed	Admixed	Admixed	Admixed	Admixed	Admixed	AC16
CB20_MAR_318	G272	Defra	2	Europe	SubPop2	SubPop2	Admixed	SubPop5	Admixed	Admixed	Admixed	Admixed	Admixed	AC7
CB20_MAR_319	G273	TR05671	2	Canada	SubPop2	SubPop2	SubPop2	Admixed	Admixed	Admixed	Admixed	SubPop7	SubPop5	AC7
CB20_MAR_320	G274	Braemar	2	Europe	SubPop2	SubPop2	SubPop2	SubPop5	SubPop5	SubPop6	SubPop6	SubPop3	SubPop3	AC2
CB20_MAR_321	G275	R.T.RAMAGE	2	USA	SubPop1	SubPop1	Admixed	Admixed	Admixed	Admixed	Admixed	Admixed	Admixed	AC6
CB20_MAR_322	G276	C 50	2	Landrace	Admixed	Admixed	Admixed	Admixed	Admixed	Admixed	Admixed	Admixed	Admixed	AC15
CB20_MAR_323	G277	Arar/H.spont.19-15//Hml/3/H.spont.41-1/Tadmor/4/Tadmor//ER/Apm	2	ICARDA	Admixed	Admixed	Admixed	Admixed	Admixed	Admixed	Admixed	Admixed	Admixed	AC9
CB20_MAR_324	G278	J04079115 09/3T0039	2	USA	SubPop2	SubPop2	Admixed	Admixed	Admixed	Admixed	Admixed	Admixed	Admixed	AC1
CB20_MAR_325	G279	Alanda-01//Atahualpa/IraqiBlack	2	ICARDA	SubPop2	SubPop2	Admixed	Admixed	Admixed	Admixed	Admixed	Admixed	Admixed	AC4
CB20_MAR_327	G280	Arar/Rhn-03//Kabaa-03/4/Manal/3/Lignee527/NK1272//JLB70-63	6	ICARDA	SubPop1	Admixed	Admixed	Admixed	Admixed	Admixed	Admixed	Admixed	Admixed	AC12
CB20_MAR_329	G281	Aths/Lignee686/4/Avt/Attiki//Aths/3/Giza121/Pue	6	ICARDA	SubPop1	SubPop1	Admixed	SubPop3	SubPop4	SubPop7	SubPop5	SubPop9	SubPop2	AC12
CB20_MAR_330	G282	Lignee527/Aths//Aths/Lignee686/3/Alanda	6	ICARDA	SubPop1	SubPop1	Admixed	SubPop3	SubPop4	SubPop7	SubPop5	SubPop9	SubPop2	AC9
CB20_MAR_333	G283	LACEY/ATILIR	6	ICARDA	SubPop1	Admixed	Admixed	Admixed	Admixed	Admixed	Admixed	Admixed	Admixed	AC12
CB20_MAR_334	G284	M104/PFC 88210//DOÑA JOSEFA	6	ICARDA	SubPop1	Admixed	Admixed	SubPop2	SubPop6	SubPop5	SubPop2	SubPop5	Admixed	AC16
CB20_MAR_335	G285	PENCO/CHEVRON-BAR/6/P.STO/3/LBIRAN/UNA80//LIGNEE640/4/ BLLU/5/PETUNIA 1	6	ICARDA	SubPop1	Admixed	Admixed	Admixed	SubPop6	SubPop5	SubPop2	Admixed	SubPop7	AC15
CB20_MAR_336	G286	FRESA/PETUNIA 1/7/P.STO/3/LBIRAN/UNA80//LIGNEE640/4/ BLLU/5/PETUNIA 1/6/LEGACY//PENCO/CHEVRON-BAR	6	ICARDA	SubPop1	Admixed	Admixed	Admixed	SubPop6	SubPop5	SubPop2	SubPop5	SubPop7	AC16
CB20_MAR_337	G287	P.STO/3/LBIRAN/UNA80//LIGNEE640/4/BLLU/5/PETUNIA 1/6/P.STO/3/LBIRAN/UNA80//LIGNEE640/4/BLLU/5/PETUNIA 1	6	ICARDA	SubPop1	Admixed	Admixed	SubPop2	SubPop6	SubPop5	SubPop2	SubPop5	SubPop7	AC16
CB20_MAR_338	G288	P.STO/3/LBIRAN/UNA80//LIGNEE640/4/BLLU/5/PETUNIA 1/6/TOCTE	6	ICARDA	SubPop1	SubPop3	Admixed	Admixed	Admixed	Admixed	Admixed	Admixed	SubPop7	AC16
CB20_MAR_339	G289	CIRU/3/LEGACY//PENCO/CHEVRON-BAR	6	ICARDA	SubPop1	Admixed	Admixed	Admixed	Admixed	Admixed	Admixed	Admixed	Admixed	AC16
CB20_MAR_34	G290	Moronera	2	Latin-America	SubPop2	SubPop2	SubPop2	SubPop5	SubPop5	SubPop6	SubPop6	SubPop3	SubPop3	AC1
CB20_MAR_340	G291	CIRU/TOCTE	6	ICARDA	SubPop1	SubPop3	Admixed	Admixed	Admixed	Admixed	Admixed	Admixed	Admixed	AC10
CB20_MAR_343	G292	GLORIA-BAR/COPAL/6/P.STO/3/LBIRAN/UNA80 //LIGNEE640/4/BLLU/5/PETUNIA 1	6	ICARDA	SubPop1	SubPop3	Admixed	Admixed	Admixed	Admixed	Admixed	Admixed	SubPop7	AC16
CB20_MAR_344	G293	CIRUELO/6/P.STO/3/LBIRAN/UNA80//LIGNEE640 /4/BLLU/5/PETUNIA 1	6	ICARDA	SubPop1	SubPop3	Admixed	Admixed	Admixed	Admixed	Admixed	Admixed	Admixed	AC15
CB20_MAR_345	G294	RECLA 60/BICHY2000//LIMON/BICHY2000/3/ BCD12DH	2	ICARDA	Admixed	SubPop3	Admixed	Admixed	Admixed	Admixed	Admixed	Admixed	Admixed	AC10
CB20_MAR_346	G295	BLLU/3/BREA/DL70//3*CABUYA	6	ICARDA	SubPop1	Admixed	Admixed	Admixed	Admixed	Admixed	Admixed	Admixed	Admixed	AC15
CB20_MAR_347	G296	CANELA//LIMON/BICHY2000	2	ICARDA	SubPop1	SubPop3	SubPop3	SubPop4	SubPop1	SubPop3	SubPop8	SubPop8	SubPop4	AC15
CB20_MAR_348	G297	LBIRAN/UNA80//LIGNEE640/6/P.STO/3/LBIRAN/UNA80//LIGNEE640/4/BLLU/5/PETUNIA 1	6	ICARDA	SubPop1	Admixed	Admixed	Admixed	Admixed	Admixed	Admixed	Admixed	Admixed	AC15
CB20_MAR_349	G298	CANELA//ATAH92/GOB	2	ICARDA	SubPop1	SubPop3	SubPop3	SubPop4	SubPop1	SubPop3	SubPop8	SubPop8	SubPop4	AC15
CB20_MAR_35	G299	Grignon	2	Latin-America	SubPop2	SubPop2	SubPop2	SubPop5	SubPop5	SubPop6	SubPop6	SubPop3	SubPop3	AC2
CB20_MAR_350	G300	CANELA/DIAMALT	2	ICARDA	Admixed	SubPop3	SubPop3	SubPop4	SubPop1	SubPop3	SubPop8	SubPop8	SubPop4	AC7
CB20_MAR_352	G301	Cerise/Shyri//Aleli/3/Mpyt169.1Y/Laurel//Olmo/4/Canela/5/DWRUB52	2	ICARDA	SubPop1	SubPop3	SubPop3	SubPop4	SubPop1	SubPop3	SubPop8	SubPop8	SubPop4	AC15
CB20_MAR_355	G302	CANELA/DIAMALT	2	ICARDA	Admixed	SubPop3	SubPop3	SubPop4	SubPop1	SubPop3	SubPop8	SubPop8	SubPop4	AC2
CB20_MAR_356	G303	MSEL/ALELI	2	ICARDA	SubPop1	SubPop3	SubPop3	SubPop4	SubPop1	SubPop3	SubPop8	SubPop8	SubPop4	AC15
CB20_MAR_357	G304	SLB15-05/4/H.spont.96-3/3/Roho//Alger/Ceres362-1-1/5/Roho/4/Zanbaka/3/ER/Apm//Lignee131	2	ICARDA	Admixed	Admixed	Admixed	Admixed	Admixed	Admixed	Admixed	Admixed	Admixed	AC9
CB20_MAR_358	G305	Moroc9-75//WI2291/WI2269/3/Nawair 1	2	ICARDA	Admixed	Admixed	SubPop1	Admixed	SubPop2	SubPop4	SubPop4	SubPop2	SubPop6	AC6
CB20_MAR_359	G306	ChiCm/An57//Albert/3/Alger/Ceres362-1-1/4/Arta/5/Nawair 1	2	ICARDA	Admixed	Admixed	SubPop1	Admixed	SubPop2	SubPop4	SubPop4	SubPop2	SubPop6	AC9
CB20_MAR_36	G307	QUINA/MJA//SCARLETT	6	ICARDA	Admixed	Admixed	Admixed	Admixed	Admixed	Admixed	Admixed	Admixed	Admixed	AC16
CB20_MAR_360	G308	ChiCm/An57//Albert/3/Alger/Ceres362-1-1/4/Arta/5/Nawair 1	2	ICARDA	Admixed	Admixed	SubPop1	Admixed	SubPop2	SubPop4	SubPop4	SubPop2	SubPop6	AC9
CB20_MAR_361	G309	Gloria'S'/Copal'S'//As46/Aths/3/Rhn-03/4/Lignee527/Aths//Lignee527/NK1272	6	ICARDA	SubPop1	SubPop1	Admixed	SubPop3	SubPop4	SubPop7	SubPop5	SubPop9	Admixed	AC12
CB20_MAR_362	G310	Hma-02//11012-2/CM67/3/Alanda/5/Rhn-03//Lignee527/NK1272/4/Lignee527/Chn-01/3/Alanda/6/AwBlack/Aths//Rhn-08/3/Malouh	6	ICARDA	SubPop1	SubPop1	Admixed	SubPop3	Admixed	Admixed	Admixed	Admixed	Admixed	AC12
CB20_MAR_363	G311	Gloria'S'/Copal'S'//As46/Aths/3/Rhn-03/5/QB813-2/5/Aths/Lignee686/4/Rhn-03/3/Bc/Rhn//Ky63-1294	6	ICARDA	SubPop1	Admixed	Admixed	SubPop3	SubPop4	SubPop7	SubPop5	Admixed	Admixed	AC9
CB20_MAR_364	G312	Rihane-03/3/As46/Aths*2//Aths/Lignee686/4/Momtaz	6	ICARDA	SubPop1	SubPop1	Admixed	SubPop3	SubPop4	SubPop7	SubPop5	SubPop9	SubPop2	AC9
CB20_MAR_365	G313	Rhn-03/Eldorado/5/Rhn-03//Lignee527/NK1272/4/Lignee527/Chn-01/3/Alanda/6/Rihane-03/4/Lignee527//Bahtim/DL71/3/Api/CM67//Mzq	6	ICARDA	SubPop1	Admixed	Admixed	SubPop3	SubPop4	SubPop7	SubPop5	SubPop9	SubPop2	AC10
CB20_MAR_366	G314	Hma-02//11012-2/CM67/3/Alanda/5/Rhn-03//Lignee527/NK1272/4/Lignee527/Chn-01/3/Alanda/6/Rhn//Bc/Coho/3/DeirAlla106//Api/EB89-8-2-15-4/5/CM67/3/Apro//Sv02109/Mari/4/Carbo	6	ICARDA	SubPop1	SubPop1	Admixed	SubPop3	SubPop4	SubPop7	SubPop5	SubPop9	SubPop2	AC12
CB20_MAR_367	G315	Baca'S'/3/AC253//CI08887/CI05761/4/Cen/Bglo'S'/5/Alanda-01/3/Alanda//Lignee527/Arar	6	ICARDA	SubPop1	Admixed	Admixed	Admixed	Admixed	Admixed	Admixed	Admixed	Admixed	AC10
CB20_MAR_368	G316	Rhn-03/Eldorado/5/Rhn-03//Lignee527/NK1272/4/Lignee527/Chn-01/3/Alanda/6/Aths/Lignee686/4/Avt/Attiki//Aths/3/Giza121/Pue	6	ICARDA	SubPop1	SubPop1	Admixed	SubPop3	SubPop4	SubPop7	SubPop5	SubPop9	SubPop2	AC12
CB20_MAR_37	G317	MSEL/LOGAN-BAR	2	ICARDA	Admixed	Admixed	Admixed	Admixed	Admixed	Admixed	Admixed	Admixed	Admixed	AC15
CB20_MAR_372	G318	Alanda//Ssn/Lignee640/3/QB813-2	6	ICARDA	SubPop1	Admixed	Admixed	Admixed	Admixed	Admixed	Admixed	Admixed	Admixed	AC10
CB20_MAR_373	G319	Avt/Attiki//M-Att-73-337-1/3/Aths/Lignee686/4/Kabaa	6	ICARDA	Admixed	Admixed	Admixed	Admixed	Admixed	Admixed	Admixed	Admixed	Admixed	NA
CB20_MAR_374	G320	Rhn-03//Lignee527/NK1272/3/Lignee527/Chn-01//Alanda/4/Eldorado	6	ICARDA	SubPop1	SubPop1	Admixed	SubPop3	SubPop4	SubPop7	SubPop5	SubPop9	SubPop2	AC12
CB20_MAR_375	G321	CIRU/TOCTE	6	ICARDA	SubPop1	SubPop3	Admixed	Admixed	Admixed	Admixed	Admixed	Admixed	Admixed	AC12
CB20_MAR_376	G322	SVANHALS-BAR/MSEL//AZAF/GOB24DH/3/NE167/CLE176	2	ICARDA	Admixed	Admixed	Admixed	Admixed	Admixed	Admixed	Admixed	Admixed	Admixed	NA
CB20_MAR_377	G323	CIRU//BREA/DL70/3/SUMBARD400	6	ICARDA	SubPop1	Admixed	Admixed	Admixed	Admixed	Admixed	Admixed	Admixed	Admixed	AC15
CB20_MAR_378	G324	TROCHU/VIVAR	6	ICARDA	SubPop1	Admixed	Admixed	Admixed	Admixed	Admixed	Admixed	Admixed	Admixed	NA
CB20_MAR_38	G325	PENCO/CHEVRON-BAR//ATAH92/GOB	6	ICARDA	SubPop1	Admixed	Admixed	Admixed	Admixed	Admixed	Admixed	Admixed	Admixed	AC16
CB20_MAR_380	G326	MSEL//PENCO/CHEVRON-BAR	2	ICARDA	SubPop1	SubPop3	SubPop3	SubPop4	Admixed	Admixed	Admixed	Admixed	Admixed	AC15
CB20_MAR_381	G327	FRANKLIN-BAR//LIMON/BICHY2000	2	ICARDA	SubPop1	SubPop3	SubPop3	Admixed	Admixed	Admixed	Admixed	Admixed	Admixed	AC15
CB20_MAR_382	G328	CHAMICO/TOCTE//CONGONA/3/LEGACY//PENCO/CHEVRON-BAR	6	ICARDA	SubPop1	Admixed	Admixed	Admixed	Admixed	Admixed	Admixed	Admixed	Admixed	AC15
CB20_MAR_383	G329	PENCO/CHEVRON-BAR//FALCON-BAR	2	ICARDA	SubPop1	SubPop3	SubPop3	SubPop4	Admixed	Admixed	Admixed	Admixed	Admixed	AC15
CB20_MAR_384	G330	PETUNIA 1/RITA PELADA	6	ICARDA	SubPop1	Admixed	SubPop4	SubPop2	Admixed	Admixed	Admixed	Admixed	Admixed	AC16
CB20_MAR_386	G331	Granger	2	Australia	SubPop2	SubPop2	Admixed	SubPop5	Admixed	Admixed	Admixed	SubPop3	SubPop3	AC2
CB20_MAR_387	G332	Gairdner	2	Australia	Admixed	Admixed	Admixed	Admixed	Admixed	Admixed	Admixed	Admixed	Admixed	AC2
CB20_MAR_388	G333	Flinders	2	Australia	SubPop2	SubPop2	Admixed	SubPop5	Admixed	Admixed	Admixed	Admixed	Admixed	AC8
CB20_MAR_389	G334	Fleet	2	Australia	Admixed	Admixed	SubPop1	Admixed	SubPop2	SubPop4	SubPop4	Admixed	Admixed	AC9
CB20_MAR_39	G335	AZAF/SCARLETT	2	ICARDA	Admixed	Admixed	Admixed	Admixed	Admixed	Admixed	Admixed	Admixed	Admixed	AC1
CB20_MAR_390	G336	Flagship	2	Australia	SubPop2	Admixed	Admixed	Admixed	Admixed	Admixed	Admixed	Admixed	Admixed	AC9
CB20_MAR_391	G337	Fathom	2	Australia	Admixed	Admixed	SubPop1	Admixed	SubPop2	SubPop4	SubPop4	SubPop2	SubPop6	AC9
CB20_MAR_392	G338	Commander	2	Australia	Admixed	Admixed	Admixed	Admixed	SubPop2	SubPop4	SubPop4	Admixed	Admixed	AC9
CB20_MAR_393	G339	Compass	2	Australia	Admixed	Admixed	Admixed	Admixed	Admixed	Admixed	Admixed	Admixed	Admixed	AC14
CB20_MAR_394	G340	Capstan	2	Australia	Admixed	Admixed	SubPop1	Admixed	SubPop2	SubPop4	SubPop4	SubPop2	SubPop6	AC9
CB20_MAR_395	G341	Buloke	2	Australia	SubPop2	Admixed	Admixed	Admixed	Admixed	Admixed	Admixed	Admixed	Admixed	AC12
CB20_MAR_396	G342	Baudin	2	Australia	SubPop2	SubPop2	Admixed	Admixed	Admixed	Admixed	Admixed	Admixed	Admixed	AC6
CB20_MAR_398	G343	Barque	2	Australia	Admixed	Admixed	SubPop1	Admixed	SubPop2	SubPop4	SubPop4	SubPop2	SubPop6	AC9
CB20_MAR_4	G344	Harmal	2	ICARDA	Admixed	Admixed	Admixed	Admixed	Admixed	Admixed	Admixed	Admixed	Admixed	AC4
CB20_MAR_40	G345	ESMERALDA/3/SLLO/ROBUST//QUINA/4/M104	6	ICARDA	SubPop1	Admixed	Admixed	Admixed	Admixed	Admixed	Admixed	Admixed	Admixed	AC15
CB20_MAR_401	G346	Hindmarsh	2	Australia	SubPop2	Admixed	Admixed	Admixed	Admixed	Admixed	Admixed	Admixed	Admixed	AC9
CB20_MAR_402	G347	Keel	2	Australia	Admixed	Admixed	Admixed	Admixed	SubPop2	Admixed	Admixed	Admixed	Admixed	AC12
CB20_MAR_403	G348	La Trobe	2	Australia	Admixed	Admixed	Admixed	Admixed	Admixed	Admixed	Admixed	Admixed	Admixed	AC9
CB20_MAR_406	G349	Martime	2	Australia	Admixed	Admixed	Admixed	Admixed	Admixed	Admixed	Admixed	Admixed	Admixed	AC12
CB20_MAR_408	G350	Rosalind	2	Australia	SubPop2	SubPop2	Admixed	Admixed	Admixed	Admixed	Admixed	Admixed	Admixed	AC7
CB20_MAR_409	G351	Schooner	2	Australia	SubPop2	Admixed	Admixed	Admixed	SubPop2	SubPop4	SubPop4	Admixed	Admixed	AC12
CB20_MAR_41	G352	BRS195/SCARLETT	2	ICARDA	Admixed	Admixed	Admixed	Admixed	Admixed	Admixed	Admixed	Admixed	Admixed	AC2
CB20_MAR_410	G353	Shepherd	2	Australia	SubPop2	SubPop2	Admixed	SubPop5	Admixed	Admixed	Admixed	Admixed	Admixed	AC2
CB20_MAR_411	G354	Skipper	2	Australia	Admixed	Admixed	Admixed	Admixed	SubPop2	SubPop4	SubPop4	Admixed	Admixed	AC12
CB20_MAR_412	G355	Sloop	2	Australia	Admixed	Admixed	Admixed	Admixed	SubPop2	SubPop4	SubPop4	Admixed	Admixed	AC12
CB20_MAR_416	G356	Westminster	2	Europe	SubPop2	SubPop2	Admixed	SubPop5	Admixed	Admixed	Admixed	Admixed	Admixed	AC2
CB20_MAR_417	G357	BL10	6	India	SubPop1	SubPop3	Admixed	Admixed	Admixed	Admixed	Admixed	Admixed	Admixed	AC16
CB20_MAR_418	G358	BL16	6	India	SubPop1	Admixed	Admixed	Admixed	Admixed	Admixed	Admixed	Admixed	Admixed	AC15
CB20_MAR_419	G359	DWRUB52	2	India	Admixed	Admixed	Admixed	Admixed	Admixed	Admixed	Admixed	Admixed	Admixed	AC10
CB20_MAR_42	G360	PFC9202//LM 844/QUILMES PAMPA/3/CANELA	2	ICARDA	Admixed	Admixed	Admixed	Admixed	Admixed	Admixed	Admixed	Admixed	Admixed	AC7
CB20_MAR_424	G361	Furat-3	2	ICARDA	SubPop2	Admixed	Admixed	Admixed	Admixed	Admixed	Admixed	Admixed	Admixed	AC12
CB20_MAR_427	G362	Kardia	2	USA	SubPop2	Admixed	Admixed	Admixed	Admixed	Admixed	Admixed	Admixed	Admixed	AC3
CB20_MAR_43	G363	PFC9214//PENCO/CHEVRON-BAR	2	ICARDA	SubPop1	SubPop3	Admixed	Admixed	Admixed	Admixed	Admixed	Admixed	Admixed	AC15
CB20_MAR_435	G364	08ARS028-20	2	USA	SubPop2	SubPop2	Admixed	Admixed	Admixed	Admixed	Admixed	Admixed	Admixed	AC2
CB20_MAR_44	G365	LIMON/BICHY2000/4/ALELI/3/ARUPO/K8755//MORA/5/MSEL	2	ICARDA	SubPop2	Admixed	Admixed	Admixed	Admixed	Admixed	Admixed	Admixed	Admixed	AC8
CB20_MAR_45	G366	80.5162/MSEL//GLORIA-BAR/IAR.H.485	2	ICARDA	Admixed	Admixed	Admixed	Admixed	Admixed	Admixed	Admixed	Admixed	Admixed	AC7
CB20_MAR_450	G367	11ARS108-4	2	USA	SubPop2	SubPop2	Admixed	SubPop5	Admixed	Admixed	Admixed	Admixed	Admixed	AC2
CB20_MAR_454	G368	10ARS041-1	2	USA	SubPop2	SubPop2	Admixed	Admixed	Admixed	Admixed	Admixed	Admixed	Admixed	AC2
CB20_MAR_458	G369	Rihane03/Atahualpa	2	ICARDA	SubPop1	Admixed	Admixed	Admixed	Admixed	Admixed	Admixed	Admixed	Admixed	NA
CB20_MAR_461	G370	CHAMICO	6	ICARDA	SubPop1	SubPop3	Admixed	Admixed	Admixed	Admixed	Admixed	Admixed	Admixed	AC15
CB20_MAR_463	G371	LIMON/BICHY2000//CANELA/3/MSEL	2	ICARDA	SubPop1	SubPop3	SubPop3	SubPop4	SubPop1	SubPop3	SubPop8	SubPop8	SubPop4	AC15
CB20_MAR_465	G372	SC 36Z47-L2	2	Europe	SubPop2	SubPop2	Admixed	SubPop5	Admixed	Admixed	Admixed	SubPop3	SubPop3	AC2
CB20_MAR_466	G373	Zeppelin (variedad europea)	2	Europe	SubPop2	SubPop2	Admixed	SubPop5	Admixed	Admixed	Admixed	Admixed	Admixed	AC2
CB20_MAR_468	G374	CANELA//ATAH92/GOB	2	ICARDA	SubPop1	SubPop3	SubPop3	SubPop4	Admixed	Admixed	Admixed	Admixed	Admixed	AC15
CB20_MAR_469	G375	CANELA//ND16680/ND13111	2	ICARDA	Admixed	SubPop3	SubPop3	SubPop4	SubPop1	SubPop3	SubPop8	SubPop8	SubPop4	AC15
CB20_MAR_47	G376	BRS195/ND19098-1	2	ICARDA	Admixed	Admixed	Admixed	Admixed	Admixed	Admixed	Admixed	Admixed	Admixed	AC1
CB20_MAR_470	G377	BISON 216.4/6/P.STO/3/LBIRAN/UNA80//LIGNEE640/4/BLLU/5/PETUNIA 1	2	ICARDA	Admixed	Admixed	Admixed	Admixed	Admixed	Admixed	Admixed	Admixed	Admixed	AC3
CB20_MAR_471	G378	LIMON/BICHY2000/3/ALELI/CANELA//GOB96DH/4/ASAHI 5/2*ALELI	2	ICARDA	SubPop1	SubPop3	SubPop3	SubPop4	SubPop1	SubPop3	SubPop8	SubPop8	SubPop4	AC7
CB20_MAR_472	G379	CIRU/TOCTE	6	ICARDA	SubPop1	SubPop3	Admixed	Admixed	Admixed	Admixed	Admixed	Admixed	Admixed	AC10
CB20_MAR_473	G380	BISON 136/CANELA	2	ICARDA	Admixed	SubPop3	SubPop3	SubPop4	SubPop1	Admixed	Admixed	Admixed	Admixed	AC15
CB20_MAR_474	G381	CIRU/3/LEGACY//PENCO/CHEVRON-BAR	6	ICARDA	SubPop1	Admixed	Admixed	Admixed	Admixed	Admixed	Admixed	Admixed	SubPop7	AC16
CB20_MAR_475	G382	P.STO/3/LBIRAN/UNA80//LIGNEE640/4/BLLU/5/PETUNIA 1/6/KENTUCKY36	6	ICARDA	SubPop1	SubPop3	Admixed	Admixed	Admixed	Admixed	Admixed	Admixed	Admixed	AC15
CB20_MAR_476	G383	MSEL//LIMON/BICHY2000	2	ICARDA	SubPop1	SubPop3	SubPop3	SubPop4	SubPop1	SubPop3	SubPop8	SubPop8	SubPop4	AC15
CB20_MAR_478	G384	Alexis	2	Europe	SubPop2	SubPop2	Admixed	SubPop5	Admixed	Admixed	Admixed	Admixed	Admixed	AC2
CB20_MAR_479	G385	Atribut	2	Europe	SubPop2	SubPop2	Admixed	SubPop5	Admixed	Admixed	Admixed	Admixed	Admixed	AC2
CB20_MAR_48	G386	BICHY2000//GOB/HUMAI10	2	ICARDA	SubPop1	Admixed	Admixed	Admixed	Admixed	Admixed	Admixed	Admixed	Admixed	AC15
CB20_MAR_480	G387	Chanell	2	Europe	SubPop2	SubPop2	Admixed	SubPop5	Admixed	Admixed	Admixed	Admixed	Admixed	AC2
CB20_MAR_482	G388	Derkado	2	Europe	SubPop2	SubPop2	Admixed	SubPop5	Admixed	Admixed	Admixed	Admixed	Admixed	AC2
CB20_MAR_483	G389	Harry	2	USA	SubPop2	SubPop2	Admixed	Admixed	Admixed	Admixed	Admixed	Admixed	Admixed	AC1
CB20_MAR_489	G390	Reem/TR05671	2	ICARDA	Admixed	Admixed	Admixed	Admixed	Admixed	Admixed	Admixed	Admixed	Admixed	AC10
CB20_MAR_49	G391	P.STO/3/LBIRAN/UNA80//LIGNEE640/4/BLLU/5/PETUNIA 1/6/M111/7/LEGACY/3/SVANHALSBAR/MSEL//AZAF/GOB24DH	6	ICARDA	SubPop1	Admixed	Admixed	SubPop2	Admixed	Admixed	Admixed	Admixed	Admixed	AC8
CB20_MAR_490	G392	Xena/Nawair-01	2	ICARDA	SubPop2	Admixed	Admixed	Admixed	Admixed	Admixed	Admixed	Admixed	Admixed	AC5
CB20_MAR_491	G393	MSEL/FNC1//Canela	2	ICARDA	SubPop1	SubPop3	SubPop3	SubPop4	SubPop1	SubPop3	SubPop8	SubPop8	SubPop4	AC15
CB20_MAR_492	G394	Melusine/Aleli/3/Matico/Jet//Shyri/4/Canela/5/Canela	2	ICARDA	SubPop1	SubPop3	SubPop3	SubPop4	SubPop1	SubPop3	SubPop8	SubPop8	SubPop4	AC15
CB20_MAR_493	G395	Melusine/Aleli/3/Matico/Jet//Shyri/4/Canela/5/MSEL//DEFRA/CL128	2	ICARDA	SubPop1	SubPop3	SubPop3	SubPop4	SubPop1	SubPop3	SubPop8	SubPop8	SubPop4	AC15
CB20_MAR_495	G396	ChiCm/An57//Albert/3/Alger/Ceres362-1-1/4/Arta/5/Hml	2	ICARDA	Admixed	Admixed	SubPop1	Admixed	SubPop2	SubPop4	SubPop4	SubPop2	SubPop6	AC12
CB20_MAR_496	G397	Hauran-3/MADRE SELVA	2	ICARDA	Admixed	Admixed	Admixed	Admixed	Admixed	Admixed	Admixed	Admixed	Admixed	AC5
CB20_MAR_497	G398	MADRE SELVA/4/Clipper/Volla/3/Arr/Esp//Alger/Ceres362-1-1/4/Hml	2	ICARDA	Admixed	Admixed	SubPop1	Admixed	SubPop2	SubPop4	SubPop4	SubPop2	SubPop6	AC11
CB20_MAR_498	G399	Cerise/Shyri//Aleli/3/Mpyt169-1Y/Laurel//Olmo/4/Canela/5/Leb71/CBB37//Leb71/CBB29/3/Lignee527/Chn-01	2	ICARDA	Admixed	Admixed	Admixed	Admixed	Admixed	Admixed	Admixed	Admixed	Admixed	AC15
CB20_MAR_499	G400	CompCr229//As46/Pro/3/Srs/4/RWA-M47/5/Carbo/Hamra/4/Rhn-08/3/DeirAlla106//DL71/Strain205	6	ICARDA	SubPop1	SubPop1	Admixed	SubPop3	SubPop4	SubPop7	SubPop5	SubPop9	SubPop2	AC12
CB20_MAR_5	G401	Nawair-01	2	ICARDA	Admixed	Admixed	Admixed	Admixed	Admixed	Admixed	Admixed	Admixed	Admixed	AC9
CB20_MAR_50	G402	MSEL/LA MOLINA 95	2	ICARDA	SubPop1	SubPop3	Admixed	Admixed	Admixed	Admixed	Admixed	Admixed	Admixed	AC15
CB20_MAR_500	G403	Rhn//Bc/Coho/3/DeirAlla106//Api/EB89-8-2-15-4/5/CM67/3/Apro//Sv02109/Mari/4/Carbo/6/Beecher	6	ICARDA	SubPop1	Admixed	Admixed	Admixed	SubPop4	SubPop7	SubPop5	SubPop9	SubPop2	AC12
CB20_MAR_501	G404	Rhn//Bc/Coho/3/DeirAlla106//Api/EB89-8-2-15-4/5/CM67/3/Apro//Sv02109/Mari/4/Carbo/6/IPA7	6	ICARDA	SubPop1	SubPop1	Admixed	SubPop3	SubPop4	SubPop7	SubPop5	SubPop9	SubPop2	AC12
CB20_MAR_502	G405	Aths/IPA7	6	ICARDA	SubPop1	SubPop1	Admixed	SubPop3	SubPop4	SubPop7	SubPop5	SubPop9	SubPop2	AC12
CB20_MAR_503	G406	Manal/6/P.STO/3/LBIRAN/UNA80//LIGNEE640/4/BLLU/5/PETUNIA 1	6	ICARDA	SubPop1	Admixed	Admixed	Admixed	Admixed	Admixed	Admixed	Admixed	Admixed	AC15
CB20_MAR_504	G407	ATACO/COMINO//ALELI/6/P.STO/3/LBIRAN/UNA80//LIGNEE640/4/BLLU/5/PETUNIA 1	6	ICARDA	SubPop1	Admixed	Admixed	Admixed	Admixed	Admixed	Admixed	Admixed	Admixed	AC15
CB20_MAR_505	G408	Giza132/Ishi	6	ICARDA	SubPop1	Admixed	Admixed	Admixed	Admixed	Admixed	Admixed	Admixed	Admixed	AC16
CB20_MAR_506	G409	Momtaz/6/ESMERALDA/LEGACY/6/P.STO/3/LBIRAN/UNA80//LIGNEE640/4/BLLU/5/PETUNIA 1	6	ICARDA	SubPop1	Admixed	Admixed	Admixed	Admixed	Admixed	Admixed	Admixed	Admixed	AC10
CB20_MAR_507	G410	P.STO/3/LBIRAN/UNA80//LIGNEE640/4/BLLU/5/PETUNIA 1/6/LACEY	6	ICARDA	SubPop1	Admixed	Admixed	Admixed	SubPop6	SubPop5	Admixed	Admixed	Admixed	AC16
CB20_MAR_509	G411	Xena/3/MSEL//DEFRA/CL128	2	ICARDA	Admixed	Admixed	Admixed	Admixed	Admixed	Admixed	Admixed	Admixed	Admixed	AC8
CB20_MAR_51	G412	SARA1-BAR/CAPUCHONA 20	6	ICARDA	SubPop1	Admixed	Admixed	SubPop2	SubPop6	SubPop5	SubPop2	SubPop5	Admixed	AC16
CB20_MAR_510	G413	TRIUMPH-BAR/TYRA//ARUPO*2/ABN-B/3/CANELA/4/TOCTE//GOB/HUMAI10/3/ATAH92/ALELI/5/CANELA	2	ICARDA	Admixed	SubPop3	SubPop3	SubPop4	SubPop1	SubPop3	SubPop8	SubPop8	SubPop4	AC15
CB20_MAR_513	G414	BT554/MAHIGAN	6	Other	SubPop1	Admixed	Admixed	Admixed	Admixed	Admixed	Admixed	Admixed	Admixed	NA
CB20_MAR_514	G415	RECLA 86/3/7085-B/ND4994.15//ND7556	2	ICARDA	Admixed	Admixed	Admixed	Admixed	Admixed	Admixed	Admixed	Admixed	Admixed	AC14
CB20_MAR_517	G416	Harmal-02/ArabiAbiad*2/4/Soufara-02/3/RM1508/Por//WI2269	2	ICARDA	Admixed	Admixed	SubPop1	Admixed	SubPop2	SubPop4	SubPop4	SubPop2	SubPop6	AC11
CB20_MAR_518	G417	WI2291//Apm/PI000046/3/Hml-02/4/WI3213	2	ICARDA	Admixed	Admixed	Admixed	Admixed	SubPop2	SubPop4	SubPop4	SubPop2	SubPop6	AC9
CB20_MAR_519	G418	Mzq/Gva//PI002917/3/WI2291/WI2269/4/WI3213	2	ICARDA	SubPop2	SubPop2	SubPop1	Admixed	SubPop2	SubPop4	SubPop4	SubPop2	SubPop6	AC9
CB20_MAR_52	G419	MSEL/ND19098-1//CANELA	2	ICARDA	Admixed	Admixed	Admixed	Admixed	Admixed	Admixed	Admixed	Admixed	Admixed	AC15
CB20_MAR_520	G420	Tidone/8/Pld10342//Cr115/Por/3/Bahtim9/4/Ds/Apro/5/WI2291/6/WI2291/WI2269/7/WI2291/WI2269//WI2291/Bgs	2	ICARDA	Admixed	Admixed	Admixed	Admixed	Admixed	Admixed	Admixed	Admixed	Admixed	AC6
CB20_MAR_521	G421	Clipper//WI2291*2/WI2269/5/Soufara-02/3/RM1508/Por//WI2269/4/Hml-02/ArabiAbiad//ER/Apm	2	ICARDA	Admixed	Admixed	SubPop1	Admixed	SubPop2	SubPop4	SubPop4	SubPop2	SubPop6	AC9
CB20_MAR_522	G422	Mzq/Gva//PI002917/3/WI2291/WI2269/4/WI3213	2	ICARDA	SubPop2	Admixed	SubPop1	Admixed	SubPop2	SubPop4	SubPop4	SubPop2	SubPop6	AC9
CB20_MAR_523	G423	H.spont.41-1/WI3257	2	ICARDA	SubPop2	SubPop2	Admixed	SubPop5	Admixed	Admixed	Admixed	Admixed	Admixed	AC4
CB20_MAR_524	G424	WI2291//Apm/PI000046/3/Hml-02/4/Mzq/Gva//PI002917/3/WI2291/WI2269	2	ICARDA	Admixed	Admixed	SubPop1	Admixed	SubPop2	SubPop4	SubPop4	SubPop2	SubPop6	AC9
CB20_MAR_525	G425	Moroc9-75//WI2291/CI01387/3/H.spont.41-1	2	ICARDA	Admixed	Admixed	Admixed	Admixed	SubPop2	SubPop4	SubPop4	SubPop2	SubPop6	AC6
CB20_MAR_53	G426	PETUNIA 2/M111	6	ICARDA	SubPop1	SubPop1	SubPop4	SubPop2	Admixed	Admixed	Admixed	Admixed	Admixed	AC16
CB20_MAR_56	G427	RD2552	6	India	SubPop1	SubPop1	SubPop4	Admixed	SubPop3	SubPop1	SubPop7	SubPop1	SubPop8	AC12
CB20_MAR_57	G428	RD2592	6	India	SubPop1	Admixed	Admixed	Admixed	Admixed	Admixed	Admixed	Admixed	Admixed	AC10
CB20_MAR_58	G429	CHAKIRA	2	Europe	SubPop2	SubPop2	SubPop2	SubPop5	SubPop5	SubPop6	SubPop6	SubPop3	SubPop3	AC2
CB20_MAR_59	G430	Petunia1//Atahualpa/IraqiBlack	2	ICARDA	Admixed	Admixed	Admixed	Admixed	Admixed	Admixed	Admixed	Admixed	Admixed	AC12
CB20_MAR_6	G431	Momtaz	6	ICARDA	SubPop1	SubPop1	Admixed	Admixed	Admixed	Admixed	Admixed	Admixed	Admixed	AC12
CB20_MAR_61	G432	PENCO/CHEVRON-BAR//ND20493	6	ICARDA	SubPop1	Admixed	Admixed	Admixed	Admixed	Admixed	Admixed	Admixed	Admixed	AC10
CB20_MAR_62	G433	PENCO/CHEVRON-BAR//GRIT	6	ICARDA	SubPop1	Admixed	Admixed	Admixed	Admixed	Admixed	Admixed	Admixed	Admixed	AC16
CB20_MAR_63	G434	BREA/DL70//TOCTE/3/BREA/DL70//CABUYA/4/BREA/DL70//CABUYA	6	ICARDA	SubPop1	Admixed	Admixed	SubPop2	SubPop6	SubPop5	SubPop2	SubPop5	Admixed	AC10
CB20_MAR_64	G435	LEGACY/4/TOCTE//GOB/HUMAI10/3/ATAH92/ALELI/5/CIRUELO	2	ICARDA	SubPop1	Admixed	Admixed	Admixed	Admixed	Admixed	Admixed	Admixed	Admixed	AC8
CB20_MAR_65	G436	LEGACY/CHAMICO//ATAH92/GOB	6	ICARDA	SubPop1	Admixed	Admixed	Admixed	Admixed	Admixed	Admixed	Admixed	SubPop9	AC10
CB20_MAR_66	G437	GADA/PYE//VADA	2	ICARDA	Admixed	Admixed	Admixed	Admixed	Admixed	Admixed	Admixed	Admixed	Admixed	AC6
CB20_MAR_68	G438	ZIG ZIG/PUNGSANCHAPSSALBORI	6	ICARDA	Admixed	Admixed	Admixed	Admixed	Admixed	Admixed	Admixed	Admixed	Admixed	AC10
CB20_MAR_69	G439	BGCLM 157.MBV/ND20493	6	ICARDA	SubPop1	Admixed	Admixed	Admixed	Admixed	Admixed	Admixed	Admixed	Admixed	AC15
CB20_MAR_70	G440	ORCA-BAR/WC46310	6	ICARDA	SubPop1	Admixed	Admixed	SubPop2	SubPop6	SubPop5	SubPop2	SubPop5	Admixed	AC15
CB20_MAR_71	G441	ORCA-BAR/GUAYABA	2	ICARDA	Admixed	Admixed	Admixed	Admixed	Admixed	Admixed	Admixed	Admixed	Admixed	AC15
CB20_MAR_72	G442	SHYRI/3/ZHEDAR#1/SHYRI//OLMO	2	ICARDA	SubPop1	Admixed	Admixed	Admixed	Admixed	Admixed	Admixed	Admixed	Admixed	AC16
CB20_MAR_74	G443	OPS 19/CANELA	6	ICARDA	SubPop1	Admixed	Admixed	Admixed	Admixed	Admixed	Admixed	SubPop5	Admixed	AC15
CB20_MAR_75	G444	TANGO-BAR/MALEBO	2	ICARDA	Admixed	Admixed	Admixed	Admixed	Admixed	Admixed	Admixed	Admixed	Admixed	AC14
CB20_MAR_76	G445	BISON 129/CANELA	2	ICARDA	Admixed	Admixed	Admixed	Admixed	Admixed	Admixed	Admixed	Admixed	Admixed	AC16
CB20_MAR_78	G446	OPS 66/CANELA	2	ICARDA	SubPop1	Admixed	Admixed	Admixed	Admixed	Admixed	Admixed	Admixed	Admixed	AC16
CB20_MAR_79	G447	SICH84.80/BISON 129	2	ICARDA	Admixed	Admixed	Admixed	Admixed	Admixed	Admixed	Admixed	Admixed	Admixed	AC16
CB20_MAR_8	G448	V Morales	6	ICARDA	SubPop1	SubPop1	Admixed	Admixed	SubPop3	SubPop1	SubPop7	SubPop1	SubPop8	AC12
CB20_MAR_80	G449	SICH84.80/BISON 216.4	2	ICARDA	Admixed	Admixed	Admixed	Admixed	Admixed	Admixed	Admixed	Admixed	Admixed	AC14
CB20_MAR_83	G450	STRIDER/3/GRIT/VALERIANA//GLORIA-BAR/COPAL	2	ICARDA	Admixed	Admixed	Admixed	Admixed	Admixed	Admixed	Admixed	Admixed	Admixed	AC3
CB20_MAR_84	G451	BH 75	6	India	SubPop1	SubPop1	Admixed	Admixed	SubPop3	SubPop1	SubPop7	SubPop1	SubPop8	AC12
CB20_MAR_85	G452	BH 393	6	India	SubPop1	SubPop1	Admixed	Admixed	Admixed	SubPop1	SubPop7	SubPop1	Admixed	AC12
CB20_MAR_87	G453	RAJKIRAN	6	India	SubPop1	SubPop1	Admixed	Admixed	Admixed	Admixed	Admixed	Admixed	Admixed	NA
CB20_MAR_88	G454	RD 2035	6	India	SubPop1	Admixed	Admixed	Admixed	SubPop3	SubPop1	SubPop7	SubPop1	SubPop8	AC15
CB20_MAR_89	G455	BCU 73	2	India	Admixed	Admixed	Admixed	Admixed	Admixed	Admixed	Admixed	Admixed	Admixed	AC16
CB20_MAR_9	G456	H96109010	6	Canada	SubPop1	SubPop1	Admixed	Admixed	Admixed	Admixed	Admixed	Admixed	Admixed	AC16
CB20_MAR_90	G457	DL 88	6	India	SubPop1	SubPop1	Admixed	Admixed	Admixed	Admixed	Admixed	Admixed	Admixed	AC12
CB20_MAR_91	G458	K 508	6	India	SubPop1	SubPop1	Admixed	Admixed	SubPop3	SubPop1	SubPop7	SubPop1	SubPop8	AC15
CB20_MAR_92	G459	DWRUB 64	6	India	SubPop1	SubPop1	Admixed	Admixed	Admixed	Admixed	Admixed	Admixed	Admixed	AC12
CB20_MAR_93	G460	DWRB 91	2	India	SubPop1	Admixed	Admixed	Admixed	Admixed	Admixed	Admixed	Admixed	Admixed	AC12
CB20_MAR_94	G461	ALFA 93	2	Latin-America	SubPop2	SubPop2	Admixed	SubPop5	Admixed	Admixed	Admixed	Admixed	Admixed	AC9
CB20_MAR_95	G462	DWRB 73	2	India	SubPop1	Admixed	Admixed	Admixed	Admixed	Admixed	Admixed	Admixed	Admixed	AC15
CB20_MAR_97	G463	DWRB 92	2	India	Admixed	Admixed	Admixed	Admixed	Admixed	Admixed	Admixed	Admixed	Admixed	AC10
CB20_MAR_98	G464	HUB 113 (BCU-8017)	6	India	SubPop1	SubPop1	SubPop4	Admixed	SubPop3	SubPop1	SubPop7	SubPop1	SubPop8	AC12
CB20_MAR_99	G465	BH 885	2	India	Admixed	Admixed	Admixed	Admixed	Admixed	Admixed	Admixed	Admixed	Admixed	AC15
CB21_MAR_478	G466	Frontier/RD2668	2	ICARDA	Admixed	Admixed	SubPop1	Admixed	SubPop2	SubPop4	SubPop4	SubPop2	SubPop6	AC12
CB21_MAR_479	G467	San cristobal/DWR28	2	ICARDA	Admixed	Admixed	Admixed	Admixed	Admixed	Admixed	Admixed	Admixed	Admixed	AC5
CB21_MAR_480	G468	Moroc9-75/Hml/5/Roho/4/Zanbaka/3/ER/Apm//Lignee131/6/WI2291/3/CI03309/Attiki//Hja33/4/Gustoe/5/Arar/H.spont.19-15//Hml/3/H.spont.41-1/Tadmor	2	ICARDA	Admixed	Admixed	SubPop1	Admixed	SubPop2	SubPop4	SubPop4	SubPop2	SubPop6	AC13
CB21_MAR_481	G469	ArabiAbiad/Arar//H.spont.41-5/Tadmor/3/ArabiAbiad/Arar//H.spont.41-5/Tadmor/4/Weeah11//WI2291/Bgs/3/ER/Apm//AC253	2	ICARDA	Admixed	Admixed	Admixed	Admixed	Admixed	Admixed	Admixed	Admixed	Admixed	AC13
CB21_MAR_482	G470	DWR28/RD2668	2	ICARDA	SubPop1	Admixed	Admixed	Admixed	Admixed	Admixed	Admixed	Admixed	Admixed	AC10
CB21_MAR_483	G471	T-6669//Arda/Moroc9-75	2	ICARDA	SubPop2	SubPop2	SubPop1	Admixed	SubPop2	SubPop4	SubPop4	SubPop2	SubPop6	AC9
CB21_MAR_484	G472	WI2291/Nawair-1	2	ICARDA	SubPop2	SubPop2	Admixed	Admixed	SubPop2	SubPop4	SubPop4	SubPop2	SubPop6	AC4
CB21_MAR_485	G473	Weeah11//WI2291/Bgs/3/ER/Apm//AC253/4/Harmal	2	ICARDA	Admixed	Admixed	Admixed	Admixed	SubPop2	SubPop4	Admixed	Admixed	Admixed	AC13
CB21_MAR_486	G474	Leb71/CBB37//Leb71/CBB29/3/Lignee527/Chn-01/6/WI2291/4/7028/2759/3/69-82//Ds/Apro/5/Zanbaka/3/ER/Apm//Lignee131	2	ICARDA	Admixed	Admixed	Admixed	Admixed	Admixed	Admixed	Admixed	Admixed	Admixed	NA
CB21_MAR_489	G475	Arta/3/Legia/Laurel'S//Aleli/4/Arar/H.spont.19-15//Hml/3/H.spont.41-1/Tadmor/5/Zanbakian/6/Arta/WI3167	2	ICARDA	Admixed	Admixed	Admixed	Admixed	Admixed	Admixed	Admixed	Admixed	Admixed	AC12
CB21_MAR_490	G476	WI2198/Hml-02//INRA55-86-2/Rt1703/3/Hml/4/Weeah11//WI2291/Bgs/3/ER/Apm//AC253	2	ICARDA	Admixed	Admixed	SubPop1	Admixed	Admixed	Admixed	Admixed	Admixed	Admixed	NA
CB21_MAR_491	G477	Gobernadora/Nawair-1	2	ICARDA	Admixed	Admixed	Admixed	Admixed	Admixed	Admixed	Admixed	Admixed	Admixed	AC12
CB21_MAR_492	G478	Rhn-03/3/Mr25-84/Att//Mari/Aths*3-02/4/Alanda-01/5/Rhn-03/3/Mr25-84/Att//Mari/Aths*3-02/4/Ssn/Badia//Arar/3/Gloria'S'/Copal'S'	6	ICARDA	SubPop1	SubPop1	Admixed	SubPop3	SubPop4	SubPop7	SubPop5	SubPop9	SubPop2	AC9
CB21_MAR_493	G479	Nadawa/Rhn-03/3/Lignee527/Rihane//Arar/5/Lignee527/NK1272/4/Avt/Attiki//Aths/3/Giza121/Pue	6	ICARDA	SubPop1	SubPop1	Admixed	SubPop3	Admixed	Admixed	Admixed	Admixed	Admixed	AC12
CB21_MAR_494	G480	QB813-2/5/Aths/Lignee686/4/Rhn-03/3/Bc/Rhn//Ky63-1294/7/Rhn-03/3/Mr25-84/Att//Mari/Aths*3-02/6/Lignee527//Bahtim/DL71/3/Api/CM67//Mzq/5/Alanda-01/4/WI2291/3/Api/CM67//L2966-69	6	ICARDA	SubPop1	Admixed	Admixed	Admixed	Admixed	Admixed	Admixed	Admixed	Admixed	AC14
CB21_MAR_495	G481	H.spont.41-3/SLB34-40/7/Lignee527//Bahtim/DL71/3/Api/CM67//Mzq/5/Alanda-01/4/WI2291/3/Api/CM67//L2966-69/6/Lignee527/Chn-01//Arar/Rhn-03	6	ICARDA	Admixed	Admixed	Admixed	Admixed	Admixed	Admixed	Admixed	Admixed	Admixed	AC9
CB21_MAR_496	G482	Alanda//Lignee527/Arar/6/Multan/M23/4/HopRo/3/Md/AT//CM/5/24569/7/U.Sask.1766/Api//Cel/3/Weeah/4/Arar/5/Aths	6	ICARDA	SubPop1	Admixed	Admixed	Admixed	Admixed	Admixed	Admixed	Admixed	Admixed	AC9
CB21_MAR_497	G483	Zanbaka/H.spont.41-2/4/Arar/H.spont.19-15//Hml/3/H.spont.41-1/Tadmor/5/Zanbakian/7/Lignee527//Bahtim/DL71/3/Api/CM67//Mzq/5/Alanda-01/4/WI2291/3/Api/CM67//L2966-69/6/Lignee527/Chn-01//Arar/Rhn-03	6	ICARDA	SubPop1	Admixed	Admixed	Admixed	Admixed	Admixed	Admixed	Admixed	Admixed	AC12
CB21_MAR_498	G484	Arig8/Imperial//M7/3/Rt013/4/Alanda-01/5/Lignee527/NK1272//JLB70-063/3/IPA99	6	ICARDA	SubPop1	SubPop1	Admixed	SubPop3	SubPop4	SubPop7	SubPop5	SubPop9	Admixed	AC9
CB21_MAR_499	G485	Hma-02//11012-2/CM67/3/Alanda/5/Rhn-03//Lignee527/NK1272/4/Lignee527/Chn-01/3/Alanda/6/Rhn-03/Eldorado/5/Rhn-03//Lignee527/NK1272/4/Lignee527/Chn-01/3/Alanda	6	ICARDA	SubPop1	SubPop1	Admixed	SubPop3	SubPop4	SubPop7	SubPop5	SubPop9	SubPop2	AC12
CB21_MAR_500	G486	Lignee527/Chn-01//Alanda/3/As57/Kc/6/Lignee527/Chn-01//Alanda/5/Arizona5908/Aths//Avt/Attiki/3/S.T.Barley/4/Aths/Lignee686	6	ICARDA	SubPop1	SubPop1	Admixed	Admixed	Admixed	Admixed	Admixed	Admixed	Admixed	AC16
CB21_MAR_501	G487	Rihane-03/3/As46/Aths*2//Aths/Lignee686/6/Rhn-03/Eldorado/5/Rhn-03//Lignee527/NK1272/4/Lignee527/Chn-01/3/Alanda	6	ICARDA	SubPop1	SubPop1	Admixed	SubPop3	SubPop4	SubPop7	SubPop5	SubPop9	SubPop2	AC12
CB21_MAR_502	G488	Aths/Lignee686/4/Avt/Attiki//Aths/3/Giza121/Pue/6/Lignee527/Chn-01//Alanda/5/Arizona5908/Aths//Avt/Attiki/3/S.T.Barley/4/Aths/Lignee686	6	ICARDA	SubPop1	SubPop1	Admixed	SubPop3	Admixed	SubPop7	SubPop5	SubPop9	Admixed	AC9
CB21_MAR_503	G489	Avt/Attiki//M-Att-73-337-1/3/Aths/Lignee686/4/Kabaa/5/Alanda-01/3/Alanda//Lignee527/Arar	6	ICARDA	SubPop1	SubPop1	Admixed	SubPop3	SubPop4	SubPop7	SubPop5	SubPop9	SubPop2	AC9
CB21_MAR_504	G490	SLB21-81/SLB22-74//Soffet no.9	6	ICARDA	SubPop1	SubPop1	Admixed	Admixed	Admixed	Admixed	Admixed	Admixed	Admixed	AC12
CB21_MAR_505	G491	Lignee527/NK1272//JLB70-063/3/IPA99/5/Arig8/Imperial//M7/3/Rt013/4/Alanda-01	6	ICARDA	SubPop1	SubPop1	Admixed	Admixed	Admixed	Admixed	Admixed	Admixed	Admixed	AC9
CB21_MAR_506	G492	10HBSN26 // MADERA / UC937	6	ICARDA	SubPop1	Admixed	Admixed	Admixed	Admixed	Admixed	Admixed	Admixed	Admixed	AC15
CB21_MAR_507	G493	UC1134/11HB44	6	ICARDA	SubPop1	Admixed	Admixed	Admixed	Admixed	Admixed	Admixed	Admixed	Admixed	AC15
CB21_MAR_508	G494	ISHI / 11HBSN44	6	ICARDA	SubPop1	Admixed	Admixed	Admixed	Admixed	Admixed	Admixed	Admixed	Admixed	AC15
CB21_MAR_509	G495	11HB13//UC1134/1047	6	ICARDA	SubPop1	Admixed	Admixed	Admixed	Admixed	Admixed	Admixed	Admixed	Admixed	AC15
CB21_MAR_510	G496	Giza130/4/Alanda-01//Gerbel/Harma/3/Gloria'S'/Celo'S'//Teran78	6	ICARDA	SubPop1	Admixed	Admixed	Admixed	Admixed	Admixed	Admixed	Admixed	Admixed	AC15
CB21_MAR_511	G497	UC1115 / 11HBSN44	6	ICARDA	SubPop1	Admixed	Admixed	Admixed	Admixed	Admixed	Admixed	Admixed	Admixed	AC8
CB21_MAR_512	G498	Atahualpa/Chigwell	2	ICARDA	SubPop1	SubPop3	Admixed	Admixed	Admixed	Admixed	Admixed	Admixed	Admixed	AC15
CB21_MAR_513	G499	WI3167/6/ANCA/2469//TOJI/3/SHYRI/4/ATACO/5/ALELI/7/Hml/Tadmor	2	ICARDA	Admixed	Admixed	Admixed	Admixed	Admixed	Admixed	Admixed	Admixed	Admixed	AC6
CB21_MAR_514	G500	11HB13 // UC 1134/ UC 1047	6	ICARDA	SubPop1	Admixed	Admixed	Admixed	Admixed	Admixed	Admixed	Admixed	Admixed	AC15
CB21_MAR_515	G501	UC 1047 / 11HB44	6	ICARDA	SubPop1	Admixed	Admixed	Admixed	Admixed	Admixed	Admixed	Admixed	Admixed	AC15
CB21_MAR_516	G502	WI3167/6/ANCA/2469//TOJI/3/SHYRI/4/ATACO/5/ALELI/7/BKFMaguelone1604/3/Apro//Sv.02109/Mari/4/Giza119/5/Shyri	2	ICARDA	Admixed	Admixed	Admixed	Admixed	Admixed	Admixed	Admixed	Admixed	Admixed	AC10
CB21_MAR_517	G503	TAMALPAIS / 11HBSN44	6	ICARDA	SubPop1	Admixed	Admixed	Admixed	Admixed	Admixed	Admixed	Admixed	Admixed	AC15
CB21_MAR_518	G504	MP30/UC1323	2	ICARDA	Admixed	Admixed	Admixed	Admixed	Admixed	Admixed	Admixed	Admixed	Admixed	AC2
CB21_MAR_519	G505	Tocada/DWRUB52	2	ICARDA	Admixed	Admixed	Admixed	Admixed	Admixed	Admixed	Admixed	Admixed	Admixed	AC11
CB21_MAR_520	G506	29IBON20// COORS 393 / ND 22202-C	2	ICARDA	Admixed	Admixed	Admixed	Admixed	Admixed	Admixed	Admixed	Admixed	Admixed	AC15
CB21_MAR_521	G507	Frontier/RD2668	2	ICARDA	Admixed	Admixed	Admixed	Admixed	Admixed	Admixed	Admixed	Admixed	Admixed	AC15
CB21_MAR_522	G508	HB120/DWR28	2	ICARDA	SubPop1	Admixed	Admixed	Admixed	Admixed	Admixed	Admixed	Admixed	Admixed	AC10
CB21_MAR_523	G509	STANDER-BAR//CALI92/ROBUST/3/LOGAN-BAR/MSEL//AZAF	2	ICARDA	SubPop1	Admixed	Admixed	Admixed	Admixed	Admixed	Admixed	Admixed	Admixed	AC16
CB21_MAR_524	G510	P.STO/3/LBIRAN/UNA80//LIGNEE640/4/BLLU/5/PETUNIA 1/6/LEGACY/7/MERIT,B//CLE150/W89.11369/3/CANELA	2	ICARDA	SubPop1	SubPop3	Admixed	Admixed	Admixed	Admixed	Admixed	Admixed	Admixed	AC3
CB21_MAR_525	G511	HB120/Harmal	2	ICARDA	SubPop1	SubPop3	SubPop3	SubPop4	SubPop1	SubPop3	SubPop8	SubPop8	SubPop4	AC15
CB21_MAR_526	G512	P.STO/3/LBIRAN/UNA80//LIGNEE640/4/BLLU/5/PETUNIA 1/6/CIRU/7/P.STO/3/LBIRAN/UNA80//LIGNEE640/4/BLLU/5/PETUNIA 1/6/IBTA80/8/LIMON/BICHY2000//CANELA/3/MSEL	2	ICARDA	SubPop1	SubPop3	SubPop3	Admixed	Admixed	Admixed	Admixed	Admixed	Admixed	AC16
CB21_MAR_527	G513	29IBON20//ORCA/ND 22202	2	ICARDA	SubPop1	SubPop3	SubPop3	SubPop4	SubPop1	Admixed	Admixed	Admixed	Admixed	AC15
CB21_MAR_528	G514	P.STO/3/LBIRAN/UNA80//LIGNEE640/4/BLLU/5/PETUNIA 1/6/LEGACY/7/MADRE SELVA	2	ICARDA	Admixed	Admixed	Admixed	Admixed	Admixed	Admixed	Admixed	Admixed	Admixed	NA
CB21_MAR_529	G515	P.STO/3/LBIRAN/UNA80//LIGNEE640/4/BLLU/5/PETUNIA 1/6/LEGACY/7/MADRE SELVA	6	ICARDA	SubPop1	SubPop3	SubPop3	Admixed	Admixed	Admixed	Admixed	Admixed	Admixed	AC16
CB21_MAR_530	G516	ZACATECAS 4 (LEGACY/CHAMICO)//CIRU/BLLU	6	ICARDA	SubPop1	Admixed	Admixed	Admixed	Admixed	Admixed	Admixed	Admixed	Admixed	AC15
CB21_MAR_531	G517	ZACATECAS 4 (LEGACY/CHAMICO)/5/EXCEL-BAR/4/GLORIA-BAR/COME//LIGNEE640/3/S.P-B	6	ICARDA	SubPop1	Admixed	Admixed	Admixed	Admixed	SubPop5	Admixed	Admixed	Admixed	AC16
CB21_MAR_532	G518	ZARZA//ATAH92/GOB/7/GLORIA-BAR/COPAL/6/P.STO/3/LBIRAN/UNA80//LIGNEE640/4/BLLU/5/PETUNIA 1	6	ICARDA	SubPop1	SubPop3	Admixed	Admixed	Admixed	Admixed	Admixed	Admixed	Admixed	AC15
CB21_MAR_533	G519	ZARZA//ATAH92/GOB/7/P.STO/3/LBIRAN/UNA80//LIGNEE640/4/BLLU/5/PETUNIA 1/6/P.STO/3/LBIRAN/UNA80//LIGNEE640/4/BLLU/5/PETUNIA 1	6	ICARDA	SubPop1	Admixed	Admixed	Admixed	Admixed	Admixed	Admixed	Admixed	Admixed	AC16
CB21_MAR_534	G520	UC 1047 / BELLA UNION	6	ICARDA	SubPop1	Admixed	Admixed	Admixed	Admixed	Admixed	Admixed	Admixed	Admixed	AC16
CB21_MAR_535	G521	P.STO/3/LBIRAN/UNA80//LIGNEE640/4/BLLU/5/PETUNIA 1/6/CIRU/7/P.STO/3/LBIRAN/UNA80//LIGNEE640/4/BLLU/5/PETUNIA 1/6/IBTA80/8/CABUYA	6	ICARDA	SubPop1	Admixed	Admixed	Admixed	SubPop6	SubPop5	SubPop2	SubPop5	SubPop7	AC16
CB21_MAR_536	G522	X // INDIAN BBARLEY/3*NK 1272	6	ICARDA	SubPop1	Admixed	Admixed	Admixed	Admixed	Admixed	Admixed	Admixed	Admixed	AC16
CB21_MAR_537	G523	UC1118 // UC1116 / YUMA	6	ICARDA	SubPop1	Admixed	Admixed	Admixed	Admixed	Admixed	Admixed	Admixed	Admixed	AC16
CB21_MAR_538	G524	22IBYT7 / UC 1047 // UC 1108	6	ICARDA	SubPop1	SubPop1	Admixed	Admixed	Admixed	Admixed	Admixed	Admixed	Admixed	AC16
CB21_MAR_539	G525	SVANHALS-BAR/MSEL//AZAF/GOB24DH/3/NE167/CLE176	2	ICARDA	SubPop1	SubPop3	Admixed	Admixed	Admixed	Admixed	Admixed	Admixed	Admixed	AC8
CB21_MAR_540	G526	Xena/DWRUB52	2	ICARDA	Admixed	Admixed	Admixed	Admixed	Admixed	Admixed	Admixed	Admixed	Admixed	AC11
CB21_MAR_559	G527	Ishi *2/Giza 132	6	ICARDA	SubPop1	Admixed	Admixed	Admixed	Admixed	Admixed	Admixed	Admixed	Admixed	AC16
CB21_MAR_560	G528	Rhn//Bc/Coho/3/DeirAlla106//Api/EB89-8-2-15-4/5/CM67/3/Apro//Sv02109/Mari/4/Carbo/6/Lignee527/NK1272//JLB70-063/3/Rhn-03	6	ICARDA	SubPop1	Admixed	Admixed	SubPop3	SubPop4	SubPop7	SubPop5	SubPop9	SubPop2	AC12
CB21_MAR_561	G529	Ishi//Rihane/221BYT7	6	ICARDA	SubPop1	Admixed	Admixed	Admixed	Admixed	Admixed	Admixed	Admixed	Admixed	AC10
CB21_MAR_562	G530	DOÑA JOSEFA/3/BREA/DL70//3*CABUYA	6	ICARDA	SubPop1	Admixed	Admixed	Admixed	SubPop6	SubPop5	Admixed	Admixed	SubPop7	AC15
