# Supplementary material for: CGIAR Barley Breeding Toolbox: A diversity panel to facilitate breeding and genomic research in the developing world
Source: Front Plant Sci. 2022 Nov 14;13:1034322. doi: 10.3389/fpls.2022.1034322 (PMC9702823; doi:10.3389/fpls.2022.1034322)
Supplement: Supplementary file 8 [file Table_6.xlsx]

## Sheet: Supplementary Table 6 (2)
Supplementary Table 6: List of the 250 entries of the CGGIAR Barley Breeding Toolbox. The pedigree, row-type, origin and population belonging from 2 to 10 population is also shown. The phenology allelic combination of every line is included
Genotype	Pedigree	Row Type	Origin	K=2	K=3	K=4	K=5	K=6	K=7	K=8	K=9	K=10	Allelic Combination
G01	CI7584	6	Landrace	SubPop1	Admixed	Admixed	Admixed	Admixed	Admixed	Admixed	Admixed	Admixed	AC10
G03	P.STO/3/LBIRAN/UNA80//LIGNEE640/4/BLLU/5/PETUNIA 1/6/ZIGZIG/4/EGYPT4/TERAN78//P.STO/3/QUINA	6	ICARDA	SubPop1	Admixed	Admixed	Admixed	Admixed	Admixed	Admixed	Admixed	SubPop9	AC16
G04	C-84	6	Landrace	SubPop2	Admixed	Admixed	Admixed	Admixed	Admixed	Admixed	Admixed	Admixed	NA
G05	Arta	6	ICARDA	SubPop1	SubPop1	Admixed	Admixed	SubPop3	SubPop1	SubPop7	SubPop1	SubPop8	AC10
G10	MADRE SELVA/Keel	6	ICARDA	SubPop1	SubPop1	Admixed	Admixed	Admixed	Admixed	Admixed	Admixed	Admixed	AC12
G12	Alanda-01/Petunia1	2	ICARDA	Admixed	Admixed	Admixed	Admixed	Admixed	Admixed	Admixed	Admixed	Admixed	AC7
G15	BREA/DL70//3*TOCTE/3/6B89.2027/CHAMICO	6	ICARDA	SubPop1	SubPop1	SubPop4	SubPop2	Admixed	Admixed	SubPop3	SubPop6	SubPop1	AC15
G16	LEGACY/CHAMICO//TRADITION	6	ICARDA	SubPop1	SubPop1	SubPop4	SubPop2	Admixed	Admixed	Admixed	Admixed	Admixed	AC15
G17	LEGACY/4/TOCTE//GOB/HUMAI10/3/ATAH92/ALELI/5/LEGACY/CHAMICO	6	ICARDA	SubPop1	SubPop1	SubPop4	SubPop2	Admixed	Admixed	Admixed	Admixed	Admixed	AC16
G18	WI3167/6/ANCA/2469//TOJI/3/SHYRI/4/ATACO/5/ALELI/7/Arar/Lignee527//Zy/DL69	2	ICARDA	Admixed	Admixed	Admixed	Admixed	Admixed	Admixed	Admixed	Admixed	Admixed	AC9
G19	BREA/DL70/M97.106	6	ICARDA	SubPop1	Admixed	Admixed	Admixed	Admixed	Admixed	Admixed	Admixed	Admixed	AC10
G20	BISON 217/3/SVANHALS-BAR/MSEL//AZAF/GOB24DH	2	ICARDA	SubPop1	Admixed	Admixed	Admixed	Admixed	Admixed	Admixed	Admixed	Admixed	AC8
G21	Alanda/5/Aths/4/Pro/TolI//Cer12/TolI/3/5106/6/Aths/7/Giza129	6	ICARDA	SubPop1	SubPop1	Admixed	Admixed	Admixed	Admixed	Admixed	Admixed	Admixed	AC12
G22	STAB33/PASION	2	ICARDA	Admixed	Admixed	Admixed	Admixed	Admixed	Admixed	Admixed	Admixed	Admixed	AC14
G29	VLB 118	6	India	SubPop1	Admixed	Admixed	Admixed	Admixed	Admixed	Admixed	Admixed	Admixed	AC14
G36	BHS 400 (BCU-8019)	6	India	SubPop1	Admixed	Admixed	Admixed	Admixed	Admixed	Admixed	Admixed	Admixed	AC10
G39	IQBA07-22	6	ICARDA	SubPop1	SubPop1	Admixed	Admixed	Admixed	Admixed	Admixed	Admixed	Admixed	AC16
G40	Zanbaka/5/Pyo/Cam//Avt/RM1508/3/Pon/4/Mona/Ben//Cam/6/Mundah	2	ICARDA	Admixed	Admixed	Admixed	Admixed	Admixed	Admixed	Admixed	Admixed	Admixed	NA
G41	Carina/Moroc9-75//WI3257	2	ICARDA	SubPop2	SubPop2	Admixed	Admixed	Admixed	Admixed	Admixed	Admixed	Admixed	AC9
G44	WI3180/4/ALISO/CI3909.2//HB602/3/MOLA/SHYRI//ARUPO*2/JET	6	ICARDA	Admixed	Admixed	Admixed	Admixed	Admixed	Admixed	Admixed	Admixed	Admixed	AC16
G48	IG 144015	6	Landrace	SubPop1	SubPop1	Admixed	Admixed	Admixed	Admixed	Admixed	Admixed	Admixed	AC12
G49	IG 144107	6	Landrace	SubPop1	SubPop1	Admixed	Admixed	Admixed	Admixed	Admixed	Admixed	Admixed	AC12
G50	IG 144146	6	Landrace	Admixed	Admixed	Admixed	Admixed	Admixed	Admixed	Admixed	Admixed	Admixed	AC13
G51	IG 144149	6	Landrace	SubPop1	Admixed	Admixed	Admixed	Admixed	Admixed	Admixed	Admixed	Admixed	AC15
G52	IG 143951	6	Landrace	SubPop1	Admixed	Admixed	Admixed	Admixed	Admixed	Admixed	Admixed	Admixed	AC15
G53	IG 144146	6	Landrace	SubPop1	Admixed	Admixed	Admixed	Admixed	Admixed	Admixed	Admixed	Admixed	AC15
G54	Mari/aths*2	6	ICARDA	SubPop1	SubPop1	Admixed	Admixed	Admixed	Admixed	Admixed	Admixed	Admixed	AC11
G55	IG 26731	6	Landrace	SubPop1	Admixed	Admixed	Admixed	Admixed	SubPop1	SubPop7	SubPop1	Admixed	AC10
G56	IG 26051	6	Landrace	SubPop1	Admixed	Admixed	Admixed	Admixed	Admixed	SubPop7	SubPop1	Admixed	AC10
G57	IG 24770	6	Landrace	SubPop1	SubPop1	Admixed	Admixed	Admixed	Admixed	Admixed	Admixed	Admixed	AC12
G58	IG 24414	6	Landrace	SubPop1	SubPop1	Admixed	Admixed	Admixed	Admixed	Admixed	Admixed	Admixed	AC11
G59	Coss/OWB71080-44-1H//Viringa'S'/3/WI3180	2	ICARDA	Admixed	Admixed	Admixed	Admixed	Admixed	Admixed	Admixed	Admixed	Admixed	AC16
G62	CABUYA/MJA//PETUNIA1/5/PENCO/CHEVRON-BAR/3/ATACO/BERMEJO//HIGO/4/PETUNIA1	6	ICARDA	SubPop1	SubPop1	Admixed	Admixed	Admixed	Admixed	Admixed	Admixed	Admixed	AC16
G64	Atahualpa	2	ICARDA	SubPop1	Admixed	Admixed	Admixed	Admixed	Admixed	Admixed	Admixed	Admixed	AC15
G66	VMorales/6/ZIGZIG/4/EGYPT4/TERAN78//P.STO/3/QUINA CBSS04B00042S-0M-0Y-0M-0Y-1M-0AP	6	ICARDA	SubPop1	Admixed	Admixed	Admixed	Admixed	Admixed	Admixed	Admixed	SubPop9	AC16
G67	BBSC/CONGONA//FRESA CBSS05Y00126S-20Y-0M-0Y-0M-2AP	6	ICARDA	SubPop1	Admixed	Admixed	Admixed	Admixed	Admixed	Admixed	Admixed	Admixed	AC15
G68	MSEL/LOGAN-BAR CBSS03B00016S-0M-0Y-0M-0Y-1M-0Y	2	ICARDA	Admixed	Admixed	Admixed	Admixed	Admixed	Admixed	Admixed	Admixed	Admixed	AC15
G73	CIRU/ZIGZIG	6	ICARDA	SubPop1	Admixed	Admixed	Admixed	Admixed	Admixed	Admixed	Admixed	SubPop9	AC15
G74	ICARDA SN326	6	ICARDA	SubPop1	Admixed	Admixed	Admixed	Admixed	Admixed	Admixed	Admixed	Admixed	AC8
G80	ALELI/SCARLETT CBSS05M00148S-2M-0Y-0M-0AP-0TR	2	ICARDA	Admixed	Admixed	Admixed	Admixed	Admixed	Admixed	Admixed	Admixed	Admixed	AC7
G90	Hooded 4	6	Landrace	SubPop1	Admixed	Admixed	Admixed	Admixed	Admixed	Admixed	Admixed	Admixed	AC15
G91	Hooded 5	6	Landrace	SubPop1	Admixed	Admixed	SubPop2	Admixed	Admixed	Admixed	Admixed	SubPop9	AC15
G92	Hooded 6	6	Landrace	SubPop1	Admixed	SubPop4	Admixed	Admixed	Admixed	Admixed	Admixed	Admixed	AC16
G106	AC-6629	6	ICARDA	SubPop1	SubPop1	Admixed	Admixed	Admixed	Admixed	Admixed	Admixed	Admixed	AC6
G108	Alanda//Lignee527/Arar/3/BF891M-617	6	ICARDA	SubPop1	Admixed	Admixed	Admixed	Admixed	Admixed	Admixed	Admixed	Admixed	AC10
G109	Arbayan/NK1272/6/CI01021/4/CM67/U.Sask.1800//Pro/CM67/3/DL70/5/Nacha2	6	ICARDA	SubPop1	SubPop1	Admixed	Admixed	Admixed	Admixed	Admixed	Admixed	Admixed	AC10
G110	ATACO/COMINO//ALELI	6	ICARDA	SubPop1	Admixed	Admixed	Admixed	Admixed	Admixed	Admixed	Admixed	Admixed	AC8
G112	CWB117-9-7/3/Roho//Alger/Ceres362-1-1/4/Pamir-147/Sonata	2	ICARDA	Admixed	Admixed	Admixed	Admixed	Admixed	Admixed	Admixed	Admixed	Admixed	AC8
G113	Katara//SLB34-65/Arar	6	ICARDA	SubPop1	Admixed	Admixed	Admixed	Admixed	Admixed	Admixed	Admixed	Admixed	AC6
G114	Massine/BF891M-596	6	ICARDA	Admixed	Admixed	Admixed	Admixed	Admixed	Admixed	Admixed	Admixed	Admixed	AC12
G115	NT111//Sonata/Arta	2	ICARDA	Admixed	Admixed	Admixed	Admixed	Admixed	Admixed	Admixed	Admixed	Admixed	NA
G116	PETUNIA1/TITIRIBI	6	ICARDA	SubPop1	Admixed	Admixed	Admixed	SubPop6	Admixed	Admixed	Admixed	Admixed	AC15
G117	Tipper/Moroc9-75	2	ICARDA	Admixed	Admixed	Admixed	Admixed	Admixed	Admixed	Admixed	Admixed	Admixed	AC6
G118	WI2269/Espe/3/WI2291/Bgs//Hml-02	2	ICARDA	Admixed	Admixed	SubPop1	Admixed	SubPop2	SubPop4	SubPop4	SubPop2	SubPop6	AC5
G119	ZIGZIG/4/BBSC/CONGONA/3/ATACO/BERMEJO//HIGO	6	ICARDA	SubPop1	Admixed	Admixed	Admixed	Admixed	Admixed	Admixed	Admixed	Admixed	AC10
G121	U.Sask.1766/Api//Cel/3/Weeah/4/Giza121/Pue	6	ICARDA	SubPop1	Admixed	Admixed	Admixed	Admixed	Admixed	Admixed	Admixed	Admixed	AC16
G125	ACSAD68	6	ICARDA	SubPop1	SubPop1	Admixed	Admixed	Admixed	Admixed	Admixed	Admixed	Admixed	AC9
G129	TISSA	2	Africa	SubPop2	SubPop2	SubPop2	SubPop5	Admixed	Admixed	Admixed	Admixed	Admixed	AC2
G130	TAMELLALT	2	Africa	SubPop2	SubPop2	Admixed	SubPop5	Admixed	Admixed	Admixed	Admixed	Admixed	AC2
G131	MASSINE	6	Africa	SubPop1	SubPop1	Admixed	Admixed	Admixed	Admixed	Admixed	Admixed	Admixed	AC12
G134	Furat-1	6	ICARDA	SubPop1	SubPop1	Admixed	SubPop3	Admixed	Admixed	Admixed	Admixed	Admixed	AC13
G140	Alanda//Lignee527/Arar/3/Asal/4/AwBlack/Aths//Rhn-08/7/Man/4/Bal16/Pro//Apm/DwII-1Y/3/Api/CM67/5/Gas/OreS/6/Atahualpa	6	ICARDA	SubPop1	Admixed	Admixed	Admixed	Admixed	Admixed	Admixed	Admixed	Admixed	AC16
G143	BICHY2000/PRTL	2	ICARDA	Admixed	Admixed	Admixed	SubPop1	Admixed	SubPop2	SubPop1	SubPop4	SubPop10	AC5
G144	Clipper//WI2291*2/WI2269/7/Hml-02/5/Cq/Cm//Apm/3/12410/4/Giza134-2L/6/Clipper/Volla/3/Arr/Esp//Alger/Ceres362-1-1/4/Hml	2	ICARDA	Admixed	Admixed	SubPop1	Admixed	SubPop2	SubPop4	SubPop4	SubPop2	SubPop6	AC9
G158	PETUNIA 1	6	ICARDA	SubPop1	Admixed	SubPop4	SubPop2	SubPop6	SubPop5	SubPop2	SubPop5	Admixed	AC15
G190	ESMERALDA/LEGACY/6/P.STO/3/LBIRAN/UNA80//LIGNEE640/4/BLLU/5/PETUNIA 1	6	ICARDA	SubPop1	Admixed	SubPop4	SubPop2	Admixed	Admixed	Admixed	Admixed	Admixed	AC15
G198	LOGAN-BAR/MSEL//AZAF	2	ICARDA	Admixed	Admixed	Admixed	Admixed	Admixed	Admixed	Admixed	Admixed	Admixed	AC16
G209	MERIT,B/4/AZAF/3/ARUPO/K8755//MORA/5/MSEL	2	ICARDA	Admixed	Admixed	Admixed	Admixed	Admixed	Admixed	Admixed	Admixed	Admixed	AC15
G219	ACUARIO T95/BCD12DH	2	ICARDA	SubPop2	SubPop2	Admixed	Admixed	Admixed	Admixed	Admixed	Admixed	Admixed	AC2
G225	MADRE SELVA/Malt 1	6	ICARDA	Admixed	Admixed	Admixed	Admixed	Admixed	Admixed	Admixed	Admixed	Admixed	AC13
G226	Harrington/Arta//Malt 1	6	ICARDA	SubPop1	SubPop1	SubPop4	SubPop2	Admixed	Admixed	Admixed	Admixed	Admixed	AC16
G228	MADRE SELVA/Malt 2	6	ICARDA	SubPop1	Admixed	SubPop4	SubPop2	SubPop6	SubPop5	SubPop2	SubPop5	Admixed	AC16
G229	MSEL//DEFRA/CL128	2	ICARDA	Admixed	Admixed	Admixed	Admixed	Admixed	Admixed	Admixed	Admixed	Admixed	AC8
G232	PETUNIA2/M111//QUINA/M112	2	ICARDA	Admixed	Admixed	SubPop1	Admixed	SubPop2	SubPop4	SubPop4	SubPop2	SubPop6	AC5
G233	CC33MS/5/NY65005-18/3/13929/NUM/ASSE/4/KBR	6	ICARDA	SubPop1	Admixed	Admixed	Admixed	Admixed	Admixed	Admixed	Admixed	Admixed	AC8
G242	WI3167/6/ANCA/2469//TOJI/3/SHYRI/4/ATACO/5/ALELI/7/Schooner/Babunj//Noor68/Kataf	2	ICARDA	Admixed	Admixed	Admixed	Admixed	Admixed	Admixed	Admixed	Admixed	Admixed	AC10
G243	DD-21/3/Harmal-02/ArabiAbiad//ER/Apm	2	ICARDA	Admixed	Admixed	Admixed	Admixed	Admixed	Admixed	Admixed	Admixed	Admixed	AC7
G244	DD-21/4/ALISO/CI3909.2//HB602/3/MOLA/SHYRI//ARUPO*2/JET	6	ICARDA	SubPop1	Admixed	Admixed	Admixed	Admixed	Admixed	Admixed	Admixed	Admixed	AC15
G245	Rt013/Nainaa/4/Lignee527/Chn-01//Gustoe/3/Atahualpa	2	ICARDA	Admixed	Admixed	Admixed	Admixed	Admixed	Admixed	Admixed	Admixed	Admixed	AC6
G246	Rhn-03//Lignee527/As45/4/Manitou/3/Arbayan-01//CI07117-9/DeirAlla106	6	ICARDA	SubPop1	SubPop1	Admixed	SubPop3	SubPop4	SubPop7	SubPop5	SubPop9	Admixed	AC9
G247	GK58/3/Kc/MullersHeydla//Sls/4/Wieselbuger//Ahor1303-61//Ste/Antares	2	ICARDA	Admixed	Admixed	Admixed	Admixed	Admixed	Admixed	Admixed	Admixed	Admixed	AC6
G248	Nadawa/Rhn-03//Saida	6	ICARDA	SubPop1	SubPop1	Admixed	SubPop3	Admixed	Admixed	SubPop5	Admixed	Admixed	AC12
G250	BICHY2000/SHENMAINO.3	2	ICARDA	SubPop1	SubPop3	Admixed	Admixed	Admixed	Admixed	Admixed	Admixed	Admixed	AC15
G251	Demhay/4/Viringa'S'//WI2291/WI2269/3/Viringa'S'	2	ICARDA	SubPop1	SubPop1	Admixed	Admixed	Admixed	Admixed	Admixed	Admixed	Admixed	AC12
G252	Alanda/Zafraa//Gloria'S'/Copal'S'/3/F6NB_7	6	ICARDA	SubPop1	SubPop1	Admixed	Admixed	Admixed	Admixed	Admixed	Admixed	Admixed	AC12
G254	Clipper//WI2291*2/WI2269/5/Soufara-02/3/RM1508/Por//WI2269/4/Hml-02/ArabiAbiad//ER/Apm	2	ICARDA	SubPop2	Admixed	SubPop1	Admixed	SubPop2	SubPop4	SubPop4	SubPop2	SubPop6	AC12
G255	Soufara-02/3/RM1508/Por//WI2269/4/Hml-02/ArabiAbiad//ER/Apm/5/((GalleonxRichard)/5)xTilga	2	ICARDA	SubPop2	Admixed	SubPop1	Admixed	SubPop2	SubPop4	SubPop4	SubPop2	SubPop6	AC12
G264	SEEBE	2	Canada	SubPop2	Admixed	Admixed	Admixed	Admixed	Admixed	Admixed	Admixed	Admixed	AC2
G268	BREA/DL70//CABUYA/3/BREA/DL70//3*CABUYA	6	ICARDA	SubPop1	Admixed	Admixed	Admixed	Admixed	Admixed	Admixed	Admixed	Admixed	AC10
G269	BISON 218.1/6/P.STO/3/LBIRAN/UNA80//LIGNEE640/4/BLLU/5/PETUNIA 1	6	ICARDA	SubPop1	Admixed	Admixed	Admixed	Admixed	Admixed	Admixed	Admixed	Admixed	AC8
G270	CONDOR-BAR/3/PATTY.B/RUDA//ALELI/4/ALELI/5/DIAMALT	2	ICARDA	Admixed	Admixed	Admixed	Admixed	Admixed	Admixed	Admixed	Admixed	Admixed	AC7
G271	ZIGZIG/BLLU//PETUNIA 1	2	ICARDA	Admixed	Admixed	Admixed	Admixed	Admixed	Admixed	Admixed	Admixed	Admixed	AC16
G276	C 50	2	Landrace	Admixed	Admixed	Admixed	Admixed	Admixed	Admixed	Admixed	Admixed	Admixed	AC15
G277	Arar/H.spont.19-15//Hml/3/H.spont.41-1/Tadmor/4/Tadmor//ER/Apm	2	ICARDA	Admixed	Admixed	Admixed	Admixed	Admixed	Admixed	Admixed	Admixed	Admixed	AC9
G279	Alanda-01//Atahualpa/IraqiBlack	2	ICARDA	SubPop2	SubPop2	Admixed	Admixed	Admixed	Admixed	Admixed	Admixed	Admixed	AC4
G280	Arar/Rhn-03//Kabaa-03/4/Manal/3/Lignee527/NK1272//JLB70-63	6	ICARDA	SubPop1	Admixed	Admixed	Admixed	Admixed	Admixed	Admixed	Admixed	Admixed	AC12
G281	Aths/Lignee686/4/Avt/Attiki//Aths/3/Giza121/Pue	6	ICARDA	SubPop1	SubPop1	Admixed	SubPop3	SubPop4	SubPop7	SubPop5	SubPop9	SubPop2	AC12
G282	Lignee527/Aths//Aths/Lignee686/3/Alanda	6	ICARDA	SubPop1	SubPop1	Admixed	SubPop3	SubPop4	SubPop7	SubPop5	SubPop9	SubPop2	AC9
G283	LACEY/ATILIR	6	ICARDA	SubPop1	Admixed	Admixed	Admixed	Admixed	Admixed	Admixed	Admixed	Admixed	AC12
G284	M104/PFC 88210//DOÑA JOSEFA	6	ICARDA	SubPop1	Admixed	Admixed	SubPop2	SubPop6	SubPop5	SubPop2	SubPop5	Admixed	AC16
G285	PENCO/CHEVRON-BAR/6/P.STO/3/LBIRAN/UNA80//LIGNEE640/4/ BLLU/5/PETUNIA 1	6	ICARDA	SubPop1	Admixed	Admixed	Admixed	SubPop6	SubPop5	SubPop2	Admixed	SubPop7	AC15
G288	P.STO/3/LBIRAN/UNA80//LIGNEE640/4/BLLU/5/PETUNIA 1/6/TOCTE	6	ICARDA	SubPop1	SubPop3	Admixed	Admixed	Admixed	Admixed	Admixed	Admixed	SubPop7	AC16
G289	CIRU/3/LEGACY//PENCO/CHEVRON-BAR	6	ICARDA	SubPop1	Admixed	Admixed	Admixed	Admixed	Admixed	Admixed	Admixed	Admixed	AC16
G290	Moronera	2	Latin-America	SubPop2	SubPop2	SubPop2	SubPop5	SubPop5	SubPop6	SubPop6	SubPop3	SubPop3	AC1
G291	CIRU/TOCTE	6	ICARDA	SubPop1	SubPop3	Admixed	Admixed	Admixed	Admixed	Admixed	Admixed	Admixed	AC10
G293	CIRUELO/6/P.STO/3/LBIRAN/UNA80//LIGNEE640 /4/BLLU/5/PETUNIA 1	6	ICARDA	SubPop1	SubPop3	Admixed	Admixed	Admixed	Admixed	Admixed	Admixed	Admixed	AC15
G295	BLLU/3/BREA/DL70//3*CABUYA	6	ICARDA	SubPop1	Admixed	Admixed	Admixed	Admixed	Admixed	Admixed	Admixed	Admixed	AC15
G297	LBIRAN/UNA80//LIGNEE640/6/P.STO/3/LBIRAN/UNA80//LIGNEE640/4/BLLU/5/PETUNIA 1	6	ICARDA	SubPop1	Admixed	Admixed	Admixed	Admixed	Admixed	Admixed	Admixed	Admixed	AC15
G298	CANELA//ATAH92/GOB	2	ICARDA	SubPop1	SubPop3	SubPop3	SubPop4	SubPop1	SubPop3	SubPop8	SubPop8	SubPop4	AC15
G300	CANELA/DIAMALT	2	ICARDA	Admixed	SubPop3	SubPop3	SubPop4	SubPop1	SubPop3	SubPop8	SubPop8	SubPop4	AC7
G302	CANELA/DIAMALT	2	ICARDA	Admixed	SubPop3	SubPop3	SubPop4	SubPop1	SubPop3	SubPop8	SubPop8	SubPop4	AC2
G304	SLB15-05/4/H.spont.96-3/3/Roho//Alger/Ceres362-1-1/5/Roho/4/Zanbaka/3/ER/Apm//Lignee131	2	ICARDA	Admixed	Admixed	Admixed	Admixed	Admixed	Admixed	Admixed	Admixed	Admixed	AC9
G305	Moroc9-75//WI2291/WI2269/3/Nawair 1	2	ICARDA	Admixed	Admixed	SubPop1	Admixed	SubPop2	SubPop4	SubPop4	SubPop2	SubPop6	AC6
G306	ChiCm/An57//Albert/3/Alger/Ceres362-1-1/4/Arta/5/Nawair 1	2	ICARDA	Admixed	Admixed	SubPop1	Admixed	SubPop2	SubPop4	SubPop4	SubPop2	SubPop6	AC9
G307	QUINA/MJA//SCARLETT	6	ICARDA	Admixed	Admixed	Admixed	Admixed	Admixed	Admixed	Admixed	Admixed	Admixed	AC16
G308	ChiCm/An57//Albert/3/Alger/Ceres362-1-1/4/Arta/5/Nawair 1	2	ICARDA	Admixed	Admixed	SubPop1	Admixed	SubPop2	SubPop4	SubPop4	SubPop2	SubPop6	AC9
G309	Gloria'S'/Copal'S'//As46/Aths/3/Rhn-03/4/Lignee527/Aths//Lignee527/NK1272	6	ICARDA	SubPop1	SubPop1	Admixed	SubPop3	SubPop4	SubPop7	SubPop5	SubPop9	Admixed	AC12
G310	Hma-02//11012-2/CM67/3/Alanda/5/Rhn-03//Lignee527/NK1272/4/Lignee527/Chn-01/3/Alanda/6/AwBlack/Aths//Rhn-08/3/Malouh	6	ICARDA	SubPop1	SubPop1	Admixed	SubPop3	Admixed	Admixed	Admixed	Admixed	Admixed	AC12
G311	Gloria'S'/Copal'S'//As46/Aths/3/Rhn-03/5/QB813-2/5/Aths/Lignee686/4/Rhn-03/3/Bc/Rhn//Ky63-1294	6	ICARDA	SubPop1	Admixed	Admixed	SubPop3	SubPop4	SubPop7	SubPop5	Admixed	Admixed	AC9
G312	Rihane-03/3/As46/Aths*2//Aths/Lignee686/4/Momtaz	6	ICARDA	SubPop1	SubPop1	Admixed	SubPop3	SubPop4	SubPop7	SubPop5	SubPop9	SubPop2	AC9
G313	Rhn-03/Eldorado/5/Rhn-03//Lignee527/NK1272/4/Lignee527/Chn-01/3/Alanda/6/Rihane-03/4/Lignee527//Bahtim/DL71/3/Api/CM67//Mzq	6	ICARDA	SubPop1	Admixed	Admixed	SubPop3	SubPop4	SubPop7	SubPop5	SubPop9	SubPop2	AC10
G314	Hma-02//11012-2/CM67/3/Alanda/5/Rhn-03//Lignee527/NK1272/4/Lignee527/Chn-01/3/Alanda/6/Rhn//Bc/Coho/3/DeirAlla106//Api/EB89-8-2-15-4/5/CM67/3/Apro//Sv02109/Mari/4/Carbo	6	ICARDA	SubPop1	SubPop1	Admixed	SubPop3	SubPop4	SubPop7	SubPop5	SubPop9	SubPop2	AC12
G315	Baca'S'/3/AC253//CI08887/CI05761/4/Cen/Bglo'S'/5/Alanda-01/3/Alanda//Lignee527/Arar	6	ICARDA	SubPop1	Admixed	Admixed	Admixed	Admixed	Admixed	Admixed	Admixed	Admixed	AC10
G316	Rhn-03/Eldorado/5/Rhn-03//Lignee527/NK1272/4/Lignee527/Chn-01/3/Alanda/6/Aths/Lignee686/4/Avt/Attiki//Aths/3/Giza121/Pue	6	ICARDA	SubPop1	SubPop1	Admixed	SubPop3	SubPop4	SubPop7	SubPop5	SubPop9	SubPop2	AC12
G317	MSEL/LOGAN-BAR	2	ICARDA	Admixed	Admixed	Admixed	Admixed	Admixed	Admixed	Admixed	Admixed	Admixed	AC15
G318	Alanda//Ssn/Lignee640/3/QB813-2	6	ICARDA	SubPop1	Admixed	Admixed	Admixed	Admixed	Admixed	Admixed	Admixed	Admixed	AC10
G319	Avt/Attiki//M-Att-73-337-1/3/Aths/Lignee686/4/Kabaa	6	ICARDA	Admixed	Admixed	Admixed	Admixed	Admixed	Admixed	Admixed	Admixed	Admixed	NA
G320	Rhn-03//Lignee527/NK1272/3/Lignee527/Chn-01//Alanda/4/Eldorado	6	ICARDA	SubPop1	SubPop1	Admixed	SubPop3	SubPop4	SubPop7	SubPop5	SubPop9	SubPop2	AC12
G322	SVANHALS-BAR/MSEL//AZAF/GOB24DH/3/NE167/CLE176	2	ICARDA	Admixed	Admixed	Admixed	Admixed	Admixed	Admixed	Admixed	Admixed	Admixed	NA
G323	CIRU//BREA/DL70/3/SUMBARD400	6	ICARDA	SubPop1	Admixed	Admixed	Admixed	Admixed	Admixed	Admixed	Admixed	Admixed	AC15
G324	TROCHU/VIVAR	6	ICARDA	SubPop1	Admixed	Admixed	Admixed	Admixed	Admixed	Admixed	Admixed	Admixed	NA
G325	PENCO/CHEVRON-BAR//ATAH92/GOB	6	ICARDA	SubPop1	Admixed	Admixed	Admixed	Admixed	Admixed	Admixed	Admixed	Admixed	AC16
G327	FRANKLIN-BAR//LIMON/BICHY2000	2	ICARDA	SubPop1	SubPop3	SubPop3	Admixed	Admixed	Admixed	Admixed	Admixed	Admixed	AC15
G328	CHAMICO/TOCTE//CONGONA/3/LEGACY//PENCO/CHEVRON-BAR	6	ICARDA	SubPop1	Admixed	Admixed	Admixed	Admixed	Admixed	Admixed	Admixed	Admixed	AC15
G330	PETUNIA 1/RITA PELADA	6	ICARDA	SubPop1	Admixed	SubPop4	SubPop2	Admixed	Admixed	Admixed	Admixed	Admixed	AC16
G335	AZAF/SCARLETT	2	ICARDA	Admixed	Admixed	Admixed	Admixed	Admixed	Admixed	Admixed	Admixed	Admixed	AC1
G344	Harmal	2	ICARDA	Admixed	Admixed	Admixed	Admixed	Admixed	Admixed	Admixed	Admixed	Admixed	AC4
G345	ESMERALDA/3/SLLO/ROBUST//QUINA/4/M104	6	ICARDA	SubPop1	Admixed	Admixed	Admixed	Admixed	Admixed	Admixed	Admixed	Admixed	AC15
G352	BRS195/SCARLETT	2	ICARDA	Admixed	Admixed	Admixed	Admixed	Admixed	Admixed	Admixed	Admixed	Admixed	AC2
G360	PFC9202//LM 844/QUILMES PAMPA/3/CANELA	2	ICARDA	Admixed	Admixed	Admixed	Admixed	Admixed	Admixed	Admixed	Admixed	Admixed	AC7
G361	Furat-3	2	ICARDA	SubPop2	Admixed	Admixed	Admixed	Admixed	Admixed	Admixed	Admixed	Admixed	AC12
G365	LIMON/BICHY2000/4/ALELI/3/ARUPO/K8755//MORA/5/MSEL	2	ICARDA	SubPop2	Admixed	Admixed	Admixed	Admixed	Admixed	Admixed	Admixed	Admixed	AC8
G366	80.5162/MSEL//GLORIA-BAR/IAR.H.485	2	ICARDA	Admixed	Admixed	Admixed	Admixed	Admixed	Admixed	Admixed	Admixed	Admixed	AC7
G369	Rihane03/Atahualpa	2	ICARDA	SubPop1	Admixed	Admixed	Admixed	Admixed	Admixed	Admixed	Admixed	Admixed	NA
G374	CANELA//ATAH92/GOB	2	ICARDA	SubPop1	SubPop3	SubPop3	SubPop4	Admixed	Admixed	Admixed	Admixed	Admixed	AC15
G375	CANELA//ND16680/ND13111	2	ICARDA	Admixed	SubPop3	SubPop3	SubPop4	SubPop1	SubPop3	SubPop8	SubPop8	SubPop4	AC15
G376	BRS195/ND19098-1	2	ICARDA	Admixed	Admixed	Admixed	Admixed	Admixed	Admixed	Admixed	Admixed	Admixed	AC1
G377	BISON 216.4/6/P.STO/3/LBIRAN/UNA80//LIGNEE640/4/BLLU/5/PETUNIA 1	2	ICARDA	Admixed	Admixed	Admixed	Admixed	Admixed	Admixed	Admixed	Admixed	Admixed	AC3
G378	LIMON/BICHY2000/3/ALELI/CANELA//GOB96DH/4/ASAHI 5/2*ALELI	2	ICARDA	SubPop1	SubPop3	SubPop3	SubPop4	SubPop1	SubPop3	SubPop8	SubPop8	SubPop4	AC7
G379	CIRU/TOCTE	6	ICARDA	SubPop1	SubPop3	Admixed	Admixed	Admixed	Admixed	Admixed	Admixed	Admixed	AC10
G380	BISON 136/CANELA	2	ICARDA	Admixed	SubPop3	SubPop3	SubPop4	SubPop1	Admixed	Admixed	Admixed	Admixed	AC15
G382	P.STO/3/LBIRAN/UNA80//LIGNEE640/4/BLLU/5/PETUNIA 1/6/KENTUCKY36	6	ICARDA	SubPop1	SubPop3	Admixed	Admixed	Admixed	Admixed	Admixed	Admixed	Admixed	AC15
G386	BICHY2000//GOB/HUMAI10	2	ICARDA	SubPop1	Admixed	Admixed	Admixed	Admixed	Admixed	Admixed	Admixed	Admixed	AC15
G390	Reem/TR05671	2	ICARDA	Admixed	Admixed	Admixed	Admixed	Admixed	Admixed	Admixed	Admixed	Admixed	AC10
G391	P.STO/3/LBIRAN/UNA80//LIGNEE640/4/BLLU/5/PETUNIA 1/6/M111/7/LEGACY/3/SVANHALSBAR/MSEL//AZAF/GOB24DH	6	ICARDA	SubPop1	Admixed	Admixed	SubPop2	Admixed	Admixed	Admixed	Admixed	Admixed	AC8
G392	Xena/Nawair-01	2	ICARDA	SubPop2	Admixed	Admixed	Admixed	Admixed	Admixed	Admixed	Admixed	Admixed	AC5
G396	ChiCm/An57//Albert/3/Alger/Ceres362-1-1/4/Arta/5/Hml	2	ICARDA	Admixed	Admixed	SubPop1	Admixed	SubPop2	SubPop4	SubPop4	SubPop2	SubPop6	AC12
G397	Hauran-3/MADRE SELVA	2	ICARDA	Admixed	Admixed	Admixed	Admixed	Admixed	Admixed	Admixed	Admixed	Admixed	AC5
G398	MADRE SELVA/4/Clipper/Volla/3/Arr/Esp//Alger/Ceres362-1-1/4/Hml	2	ICARDA	Admixed	Admixed	SubPop1	Admixed	SubPop2	SubPop4	SubPop4	SubPop2	SubPop6	AC11
G399	Cerise/Shyri//Aleli/3/Mpyt169-1Y/Laurel//Olmo/4/Canela/5/Leb71/CBB37//Leb71/CBB29/3/Lignee527/Chn-01	2	ICARDA	Admixed	Admixed	Admixed	Admixed	Admixed	Admixed	Admixed	Admixed	Admixed	AC15
G400	CompCr229//As46/Pro/3/Srs/4/RWA-M47/5/Carbo/Hamra/4/Rhn-08/3/DeirAlla106//DL71/Strain205	6	ICARDA	SubPop1	SubPop1	Admixed	SubPop3	SubPop4	SubPop7	SubPop5	SubPop9	SubPop2	AC12
G401	Nawair-01	2	ICARDA	Admixed	Admixed	Admixed	Admixed	Admixed	Admixed	Admixed	Admixed	Admixed	AC9
G402	MSEL/LA MOLINA 95	2	ICARDA	SubPop1	SubPop3	Admixed	Admixed	Admixed	Admixed	Admixed	Admixed	Admixed	AC15
G403	Rhn//Bc/Coho/3/DeirAlla106//Api/EB89-8-2-15-4/5/CM67/3/Apro//Sv02109/Mari/4/Carbo/6/Beecher	6	ICARDA	SubPop1	Admixed	Admixed	Admixed	SubPop4	SubPop7	SubPop5	SubPop9	SubPop2	AC12
G405	Aths/IPA7	6	ICARDA	SubPop1	SubPop1	Admixed	SubPop3	SubPop4	SubPop7	SubPop5	SubPop9	SubPop2	AC12
G407	ATACO/COMINO//ALELI/6/P.STO/3/LBIRAN/UNA80//LIGNEE640/4/BLLU/5/PETUNIA 1	6	ICARDA	SubPop1	Admixed	Admixed	Admixed	Admixed	Admixed	Admixed	Admixed	Admixed	AC15
G409	Momtaz/6/ESMERALDA/LEGACY/6/P.STO/3/LBIRAN/UNA80//LIGNEE640/4/BLLU/5/PETUNIA 1	6	ICARDA	SubPop1	Admixed	Admixed	Admixed	Admixed	Admixed	Admixed	Admixed	Admixed	AC10
G410	P.STO/3/LBIRAN/UNA80//LIGNEE640/4/BLLU/5/PETUNIA 1/6/LACEY	6	ICARDA	SubPop1	Admixed	Admixed	Admixed	SubPop6	SubPop5	Admixed	Admixed	Admixed	AC16
G411	Xena/3/MSEL//DEFRA/CL128	2	ICARDA	Admixed	Admixed	Admixed	Admixed	Admixed	Admixed	Admixed	Admixed	Admixed	AC8
G412	SARA1-BAR/CAPUCHONA 20	6	ICARDA	SubPop1	Admixed	Admixed	SubPop2	SubPop6	SubPop5	SubPop2	SubPop5	Admixed	AC16
G415	RECLA 86/3/7085-B/ND4994.15//ND7556	2	ICARDA	Admixed	Admixed	Admixed	Admixed	Admixed	Admixed	Admixed	Admixed	Admixed	AC14
G416	Harmal-02/ArabiAbiad*2/4/Soufara-02/3/RM1508/Por//WI2269	2	ICARDA	Admixed	Admixed	SubPop1	Admixed	SubPop2	SubPop4	SubPop4	SubPop2	SubPop6	AC11
G417	WI2291//Apm/PI000046/3/Hml-02/4/WI3213	2	ICARDA	Admixed	Admixed	Admixed	Admixed	SubPop2	SubPop4	SubPop4	SubPop2	SubPop6	AC9
G418	Mzq/Gva//PI002917/3/WI2291/WI2269/4/WI3213	2	ICARDA	SubPop2	SubPop2	SubPop1	Admixed	SubPop2	SubPop4	SubPop4	SubPop2	SubPop6	AC9
G420	Tidone/8/Pld10342//Cr115/Por/3/Bahtim9/4/Ds/Apro/5/WI2291/6/WI2291/WI2269/7/WI2291/WI2269//WI2291/Bgs	2	ICARDA	Admixed	Admixed	Admixed	Admixed	Admixed	Admixed	Admixed	Admixed	Admixed	AC6
G421	Clipper//WI2291*2/WI2269/5/Soufara-02/3/RM1508/Por//WI2269/4/Hml-02/ArabiAbiad//ER/Apm	2	ICARDA	Admixed	Admixed	SubPop1	Admixed	SubPop2	SubPop4	SubPop4	SubPop2	SubPop6	AC9
G422	Mzq/Gva//PI002917/3/WI2291/WI2269/4/WI3213	2	ICARDA	SubPop2	Admixed	SubPop1	Admixed	SubPop2	SubPop4	SubPop4	SubPop2	SubPop6	AC9
G424	WI2291//Apm/PI000046/3/Hml-02/4/Mzq/Gva//PI002917/3/WI2291/WI2269	2	ICARDA	Admixed	Admixed	SubPop1	Admixed	SubPop2	SubPop4	SubPop4	SubPop2	SubPop6	AC9
G426	PETUNIA 2/M111	6	ICARDA	SubPop1	SubPop1	SubPop4	SubPop2	Admixed	Admixed	Admixed	Admixed	Admixed	AC16
G430	Petunia1//Atahualpa/IraqiBlack	2	ICARDA	Admixed	Admixed	Admixed	Admixed	Admixed	Admixed	Admixed	Admixed	Admixed	AC12
G431	Momtaz	6	ICARDA	SubPop1	SubPop1	Admixed	Admixed	Admixed	Admixed	Admixed	Admixed	Admixed	AC12
G432	PENCO/CHEVRON-BAR//ND20493	6	ICARDA	SubPop1	Admixed	Admixed	Admixed	Admixed	Admixed	Admixed	Admixed	Admixed	AC10
G433	PENCO/CHEVRON-BAR//GRIT	6	ICARDA	SubPop1	Admixed	Admixed	Admixed	Admixed	Admixed	Admixed	Admixed	Admixed	AC16
G435	LEGACY/4/TOCTE//GOB/HUMAI10/3/ATAH92/ALELI/5/CIRUELO	2	ICARDA	SubPop1	Admixed	Admixed	Admixed	Admixed	Admixed	Admixed	Admixed	Admixed	AC8
G436	LEGACY/CHAMICO//ATAH92/GOB	6	ICARDA	SubPop1	Admixed	Admixed	Admixed	Admixed	Admixed	Admixed	Admixed	SubPop9	AC10
G437	GADA/PYE//VADA	2	ICARDA	Admixed	Admixed	Admixed	Admixed	Admixed	Admixed	Admixed	Admixed	Admixed	AC6
G438	ZIG ZIG/PUNGSANCHAPSSALBORI	6	ICARDA	Admixed	Admixed	Admixed	Admixed	Admixed	Admixed	Admixed	Admixed	Admixed	AC10
G440	ORCA-BAR/WC46310	6	ICARDA	SubPop1	Admixed	Admixed	SubPop2	SubPop6	SubPop5	SubPop2	SubPop5	Admixed	AC15
G441	ORCA-BAR/GUAYABA	2	ICARDA	Admixed	Admixed	Admixed	Admixed	Admixed	Admixed	Admixed	Admixed	Admixed	AC15
G442	SHYRI/3/ZHEDAR#1/SHYRI//OLMO	2	ICARDA	SubPop1	Admixed	Admixed	Admixed	Admixed	Admixed	Admixed	Admixed	Admixed	AC16
G443	OPS 19/CANELA	6	ICARDA	SubPop1	Admixed	Admixed	Admixed	Admixed	Admixed	Admixed	SubPop5	Admixed	AC15
G444	TANGO-BAR/MALEBO	2	ICARDA	Admixed	Admixed	Admixed	Admixed	Admixed	Admixed	Admixed	Admixed	Admixed	AC14
G445	BISON 129/CANELA	2	ICARDA	Admixed	Admixed	Admixed	Admixed	Admixed	Admixed	Admixed	Admixed	Admixed	AC16
G446	OPS 66/CANELA	2	ICARDA	SubPop1	Admixed	Admixed	Admixed	Admixed	Admixed	Admixed	Admixed	Admixed	AC16
G447	SICH84.80/BISON 129	2	ICARDA	Admixed	Admixed	Admixed	Admixed	Admixed	Admixed	Admixed	Admixed	Admixed	AC16
G448	V Morales	6	ICARDA	SubPop1	SubPop1	Admixed	Admixed	SubPop3	SubPop1	SubPop7	SubPop1	SubPop8	AC12
G450	STRIDER/3/GRIT/VALERIANA//GLORIA-BAR/COPAL	2	ICARDA	Admixed	Admixed	Admixed	Admixed	Admixed	Admixed	Admixed	Admixed	Admixed	AC3
G455	BCU 73	2	India	Admixed	Admixed	Admixed	Admixed	Admixed	Admixed	Admixed	Admixed	Admixed	AC16
G460	DWRB 91	2	India	SubPop1	Admixed	Admixed	Admixed	Admixed	Admixed	Admixed	Admixed	Admixed	AC12
G466	Frontier/RD2668	2	ICARDA	Admixed	Admixed	SubPop1	Admixed	SubPop2	SubPop4	SubPop4	SubPop2	SubPop6	AC12
G467	San cristobal/DWR28	2	ICARDA	Admixed	Admixed	Admixed	Admixed	Admixed	Admixed	Admixed	Admixed	Admixed	AC5
G468	Moroc9-75/Hml/5/Roho/4/Zanbaka/3/ER/Apm//Lignee131/6/WI2291/3/CI03309/Attiki//Hja33/4/Gustoe/5/Arar/H.spont.19-15//Hml/3/H.spont.41-1/Tadmor	2	ICARDA	Admixed	Admixed	SubPop1	Admixed	SubPop2	SubPop4	SubPop4	SubPop2	SubPop6	AC13
G469	ArabiAbiad/Arar//H.spont.41-5/Tadmor/3/ArabiAbiad/Arar//H.spont.41-5/Tadmor/4/Weeah11//WI2291/Bgs/3/ER/Apm//AC253	2	ICARDA	Admixed	Admixed	Admixed	Admixed	Admixed	Admixed	Admixed	Admixed	Admixed	AC13
G470	DWR28/RD2668	2	ICARDA	SubPop1	Admixed	Admixed	Admixed	Admixed	Admixed	Admixed	Admixed	Admixed	AC10
G472	WI2291/Nawair-1	2	ICARDA	SubPop2	SubPop2	Admixed	Admixed	SubPop2	SubPop4	SubPop4	SubPop2	SubPop6	AC4
G473	Weeah11//WI2291/Bgs/3/ER/Apm//AC253/4/Harmal	2	ICARDA	Admixed	Admixed	Admixed	Admixed	SubPop2	SubPop4	Admixed	Admixed	Admixed	AC13
G474	Leb71/CBB37//Leb71/CBB29/3/Lignee527/Chn-01/6/WI2291/4/7028/2759/3/69-82//Ds/Apro/5/Zanbaka/3/ER/Apm//Lignee131	2	ICARDA	Admixed	Admixed	Admixed	Admixed	Admixed	Admixed	Admixed	Admixed	Admixed	NA
G475	Arta/3/Legia/Laurel'S//Aleli/4/Arar/H.spont.19-15//Hml/3/H.spont.41-1/Tadmor/5/Zanbakian/6/Arta/WI3167	2	ICARDA	Admixed	Admixed	Admixed	Admixed	Admixed	Admixed	Admixed	Admixed	Admixed	AC12
G476	WI2198/Hml-02//INRA55-86-2/Rt1703/3/Hml/4/Weeah11//WI2291/Bgs/3/ER/Apm//AC253	2	ICARDA	Admixed	Admixed	SubPop1	Admixed	Admixed	Admixed	Admixed	Admixed	Admixed	NA
G477	Gobernadora/Nawair-1	2	ICARDA	Admixed	Admixed	Admixed	Admixed	Admixed	Admixed	Admixed	Admixed	Admixed	AC12
G478	Rhn-03/3/Mr25-84/Att//Mari/Aths*3-02/4/Alanda-01/5/Rhn-03/3/Mr25-84/Att//Mari/Aths*3-02/4/Ssn/Badia//Arar/3/Gloria'S'/Copal'S'	6	ICARDA	SubPop1	SubPop1	Admixed	SubPop3	SubPop4	SubPop7	SubPop5	SubPop9	SubPop2	AC9
G479	Nadawa/Rhn-03/3/Lignee527/Rihane//Arar/5/Lignee527/NK1272/4/Avt/Attiki//Aths/3/Giza121/Pue	6	ICARDA	SubPop1	SubPop1	Admixed	SubPop3	Admixed	Admixed	Admixed	Admixed	Admixed	AC12
G480	QB813-2/5/Aths/Lignee686/4/Rhn-03/3/Bc/Rhn//Ky63-1294/7/Rhn-03/3/Mr25-84/Att//Mari/Aths*3-02/6/Lignee527//Bahtim/DL71/3/Api/CM67//Mzq/5/Alanda-01/4/WI2291/3/Api/CM67//L2966-69	6	ICARDA	SubPop1	Admixed	Admixed	Admixed	Admixed	Admixed	Admixed	Admixed	Admixed	AC14
G481	H.spont.41-3/SLB34-40/7/Lignee527//Bahtim/DL71/3/Api/CM67//Mzq/5/Alanda-01/4/WI2291/3/Api/CM67//L2966-69/6/Lignee527/Chn-01//Arar/Rhn-03	6	ICARDA	Admixed	Admixed	Admixed	Admixed	Admixed	Admixed	Admixed	Admixed	Admixed	AC9
G482	Alanda//Lignee527/Arar/6/Multan/M23/4/HopRo/3/Md/AT//CM/5/24569/7/U.Sask.1766/Api//Cel/3/Weeah/4/Arar/5/Aths	6	ICARDA	SubPop1	Admixed	Admixed	Admixed	Admixed	Admixed	Admixed	Admixed	Admixed	AC9
G483	Zanbaka/H.spont.41-2/4/Arar/H.spont.19-15//Hml/3/H.spont.41-1/Tadmor/5/Zanbakian/7/Lignee527//Bahtim/DL71/3/Api/CM67//Mzq/5/Alanda-01/4/WI2291/3/Api/CM67//L2966-69/6/Lignee527/Chn-01//Arar/Rhn-03	6	ICARDA	SubPop1	Admixed	Admixed	Admixed	Admixed	Admixed	Admixed	Admixed	Admixed	AC12
G485	Hma-02//11012-2/CM67/3/Alanda/5/Rhn-03//Lignee527/NK1272/4/Lignee527/Chn-01/3/Alanda/6/Rhn-03/Eldorado/5/Rhn-03//Lignee527/NK1272/4/Lignee527/Chn-01/3/Alanda	6	ICARDA	SubPop1	SubPop1	Admixed	SubPop3	SubPop4	SubPop7	SubPop5	SubPop9	SubPop2	AC12
G486	Lignee527/Chn-01//Alanda/3/As57/Kc/6/Lignee527/Chn-01//Alanda/5/Arizona5908/Aths//Avt/Attiki/3/S.T.Barley/4/Aths/Lignee686	6	ICARDA	SubPop1	SubPop1	Admixed	Admixed	Admixed	Admixed	Admixed	Admixed	Admixed	AC16
G487	Rihane-03/3/As46/Aths*2//Aths/Lignee686/6/Rhn-03/Eldorado/5/Rhn-03//Lignee527/NK1272/4/Lignee527/Chn-01/3/Alanda	6	ICARDA	SubPop1	SubPop1	Admixed	SubPop3	SubPop4	SubPop7	SubPop5	SubPop9	SubPop2	AC12
G488	Aths/Lignee686/4/Avt/Attiki//Aths/3/Giza121/Pue/6/Lignee527/Chn-01//Alanda/5/Arizona5908/Aths//Avt/Attiki/3/S.T.Barley/4/Aths/Lignee686	6	ICARDA	SubPop1	SubPop1	Admixed	SubPop3	Admixed	SubPop7	SubPop5	SubPop9	Admixed	AC9
G489	Avt/Attiki//M-Att-73-337-1/3/Aths/Lignee686/4/Kabaa/5/Alanda-01/3/Alanda//Lignee527/Arar	6	ICARDA	SubPop1	SubPop1	Admixed	SubPop3	SubPop4	SubPop7	SubPop5	SubPop9	SubPop2	AC9
G490	SLB21-81/SLB22-74//Soffet no.9	6	ICARDA	SubPop1	SubPop1	Admixed	Admixed	Admixed	Admixed	Admixed	Admixed	Admixed	AC12
G491	Lignee527/NK1272//JLB70-063/3/IPA99/5/Arig8/Imperial//M7/3/Rt013/4/Alanda-01	6	ICARDA	SubPop1	SubPop1	Admixed	Admixed	Admixed	Admixed	Admixed	Admixed	Admixed	AC9
G492	10HBSN26 // MADERA / UC937	6	ICARDA	SubPop1	Admixed	Admixed	Admixed	Admixed	Admixed	Admixed	Admixed	Admixed	AC15
G494	ISHI / 11HBSN44	6	ICARDA	SubPop1	Admixed	Admixed	Admixed	Admixed	Admixed	Admixed	Admixed	Admixed	AC15
G495	11HB13//UC1134/1047	6	ICARDA	SubPop1	Admixed	Admixed	Admixed	Admixed	Admixed	Admixed	Admixed	Admixed	AC15
G496	Giza130/4/Alanda-01//Gerbel/Harma/3/Gloria'S'/Celo'S'//Teran78	6	ICARDA	SubPop1	Admixed	Admixed	Admixed	Admixed	Admixed	Admixed	Admixed	Admixed	AC15
G497	UC1115 / 11HBSN44	6	ICARDA	SubPop1	Admixed	Admixed	Admixed	Admixed	Admixed	Admixed	Admixed	Admixed	AC8
G499	WI3167/6/ANCA/2469//TOJI/3/SHYRI/4/ATACO/5/ALELI/7/Hml/Tadmor	2	ICARDA	Admixed	Admixed	Admixed	Admixed	Admixed	Admixed	Admixed	Admixed	Admixed	AC6
G500	11HB13 // UC 1134/ UC 1047	6	ICARDA	SubPop1	Admixed	Admixed	Admixed	Admixed	Admixed	Admixed	Admixed	Admixed	AC15
G501	UC 1047 / 11HB44	6	ICARDA	SubPop1	Admixed	Admixed	Admixed	Admixed	Admixed	Admixed	Admixed	Admixed	AC15
G502	WI3167/6/ANCA/2469//TOJI/3/SHYRI/4/ATACO/5/ALELI/7/BKFMaguelone1604/3/Apro//Sv.02109/Mari/4/Giza119/5/Shyri	2	ICARDA	Admixed	Admixed	Admixed	Admixed	Admixed	Admixed	Admixed	Admixed	Admixed	AC10
G504	MP30/UC1323	2	ICARDA	Admixed	Admixed	Admixed	Admixed	Admixed	Admixed	Admixed	Admixed	Admixed	AC2
G505	Tocada/DWRUB52	2	ICARDA	Admixed	Admixed	Admixed	Admixed	Admixed	Admixed	Admixed	Admixed	Admixed	AC11
G506	29IBON20// COORS 393 / ND 22202-C	2	ICARDA	Admixed	Admixed	Admixed	Admixed	Admixed	Admixed	Admixed	Admixed	Admixed	AC15
G507	Frontier/RD2668	2	ICARDA	Admixed	Admixed	Admixed	Admixed	Admixed	Admixed	Admixed	Admixed	Admixed	AC15
G509	STANDER-BAR//CALI92/ROBUST/3/LOGAN-BAR/MSEL//AZAF	2	ICARDA	SubPop1	Admixed	Admixed	Admixed	Admixed	Admixed	Admixed	Admixed	Admixed	AC16
G511	HB120/Harmal	2	ICARDA	SubPop1	SubPop3	SubPop3	SubPop4	SubPop1	SubPop3	SubPop8	SubPop8	SubPop4	AC15
G512	P.STO/3/LBIRAN/UNA80//LIGNEE640/4/BLLU/5/PETUNIA 1/6/CIRU/7/P.STO/3/LBIRAN/UNA80//LIGNEE640/4/BLLU/5/PETUNIA 1/6/IBTA80/8/LIMON/BICHY2000//CANELA/3/MSEL	2	ICARDA	SubPop1	SubPop3	SubPop3	Admixed	Admixed	Admixed	Admixed	Admixed	Admixed	AC16
G513	29IBON20//ORCA/ND 22202	2	ICARDA	SubPop1	SubPop3	SubPop3	SubPop4	SubPop1	Admixed	Admixed	Admixed	Admixed	AC15
G516	ZACATECAS 4 (LEGACY/CHAMICO)//CIRU/BLLU	6	ICARDA	SubPop1	Admixed	Admixed	Admixed	Admixed	Admixed	Admixed	Admixed	Admixed	AC15
G517	ZACATECAS 4 (LEGACY/CHAMICO)/5/EXCEL-BAR/4/GLORIA-BAR/COME//LIGNEE640/3/S.P-B	6	ICARDA	SubPop1	Admixed	Admixed	Admixed	Admixed	SubPop5	Admixed	Admixed	Admixed	AC16
G519	ZARZA//ATAH92/GOB/7/P.STO/3/LBIRAN/UNA80//LIGNEE640/4/BLLU/5/PETUNIA 1/6/P.STO/3/LBIRAN/UNA80//LIGNEE640/4/BLLU/5/PETUNIA 1	6	ICARDA	SubPop1	Admixed	Admixed	Admixed	Admixed	Admixed	Admixed	Admixed	Admixed	AC16
G520	UC 1047 / BELLA UNION	6	ICARDA	SubPop1	Admixed	Admixed	Admixed	Admixed	Admixed	Admixed	Admixed	Admixed	AC16
G521	P.STO/3/LBIRAN/UNA80//LIGNEE640/4/BLLU/5/PETUNIA 1/6/CIRU/7/P.STO/3/LBIRAN/UNA80//LIGNEE640/4/BLLU/5/PETUNIA 1/6/IBTA80/8/CABUYA	6	ICARDA	SubPop1	Admixed	Admixed	Admixed	SubPop6	SubPop5	SubPop2	SubPop5	SubPop7	AC16
G522	X // INDIAN BBARLEY/3*NK 1272	6	ICARDA	SubPop1	Admixed	Admixed	Admixed	Admixed	Admixed	Admixed	Admixed	Admixed	AC16
G523	UC1118 // UC1116 / YUMA	6	ICARDA	SubPop1	Admixed	Admixed	Admixed	Admixed	Admixed	Admixed	Admixed	Admixed	AC16
G524	22IBYT7 / UC 1047 // UC 1108	6	ICARDA	SubPop1	SubPop1	Admixed	Admixed	Admixed	Admixed	Admixed	Admixed	Admixed	AC16
G525	SVANHALS-BAR/MSEL//AZAF/GOB24DH/3/NE167/CLE176	2	ICARDA	SubPop1	SubPop3	Admixed	Admixed	Admixed	Admixed	Admixed	Admixed	Admixed	AC8
G526	Xena/DWRUB52	2	ICARDA	Admixed	Admixed	Admixed	Admixed	Admixed	Admixed	Admixed	Admixed	Admixed	AC11
